# Supplementary material for: Strip1 regulates retinal ganglion cell survival by suppressing Jun-mediated apoptosis to promote retinal neural circuit formation
Source: eLife. 2022 Mar 22;11:e74650. doi: 10.7554/eLife.74650 (PMC8940179; doi:10.7554/eLife.74650)
Supplement: Figure 1—figure supplement 1—source data 3. [file elife-74650-fig1-figsupp1-data3.xlsx]

## Sheet: Figure 1-figure supplement 1I
Percentage of embryos/total progeny
	WT morphology with normal retinal layers	Mutant-like morphology with normal retinal layers	Mutant-like morphology with defective retinal layers
Strip1rw147 line (Tg-)	78.9% (101/128)	0% (0/128)	21.09%(27/128)
Strip1rw147 line + hsp: wt.strip1-GFP	92% (57/62)	8% (5/62)	0% (0/62)
Strip1rw147 line + hsp: mut.strip1-GFP	67% (12/18)	0% (0/18)	33% (6/18)
