# Supplementary material for: Strip1 regulates retinal ganglion cell survival by suppressing Jun-mediated apoptosis to promote retinal neural circuit formation
Source: eLife. 2022 Mar 22;11:e74650. doi: 10.7554/eLife.74650 (PMC8940179; doi:10.7554/eLife.74650)
Supplement: Figure 2—figure supplement 1—source data 1. [file elife-74650-fig2-figsupp1-data1.xlsx]

## Sheet: Figure 2-figure supplement 1B
Total retina area in μm2			Mann Whitney test			Difference between medians
wt	strip1rw147		P value	0.0159		Median of column A	43420, n=4
46425.2	37031.6		Exact or approximate P value?	Exact		Median of column B	37859, n=5
41937.8	39323.9		P value summary	*		Difference: Actual	-5561
42417.3	35195.7		Significantly different (P < 0.05)?	Yes		Difference: Hodges-Lehmann	-5960
44422.5	39891.1		One- or two-tailed P value?	Two-tailed
	37859.3		Sum of ranks in column A,B	30 , 15
			Mann-Whitney U	0

## Sheet: Figure 2-figure supplement 1F
No. of parvalbumin+ cells (values represent average numbers from 2 different sections/biological replicate)			Unpaired t test with Welch's correction
wt	strip1rw147		P value	0.2349
55	32.5		P value summary	ns
48	47.5		Significantly different (P < 0.05)?	No
32	22.5		One- or two-tailed P value?	Two-tailed
	29.5		Welch-corrected t, df	t=1.432, df=3.502
	36

## Sheet: Figure 2-figure supplement 1G
Distribution of Parvalbumin+ ACs (%)
	INL+ve					GCL +ve
wt	56.3636	61.4583	59.375			43.6364	38.5417	40.625
strip1rw147	29.2308	15.2542	28.8889	37.5	43.1579	70.7692	84.7458	71.1111	62.5	56.8421
Tukey's multiple comparisons test	Predicted (LS) mean diff.	95.00% CI of diff.	Below threshold?	Summary	Adjusted P Value
wt:INL+ve vs. wt:GCL +ve	18.13	-3.060 to 39.32	No	ns	0.1034
wt:INL+ve vs. strip1rw147:INL+ve	28.26	9.306 to 47.21	Yes	**	0.004
wt:INL+ve vs. strip1rw147:GCL +ve	-10.13	-29.08 to 8.826	No	ns	0.4215
wt:GCL +ve vs. strip1rw147:INL+ve	10.13	-8.826 to 29.08	No	ns	0.4215
wt:GCL +ve vs. strip1rw147:GCL +ve	-28.26	-47.21 to -9.306	Yes	**	0.004
strip1rw147:INL+ve vs. strip1rw147:GCL +ve	-38.39	-54.80 to -21.97	Yes	****	<0.0001
