# Supplementary material for: Strip1 regulates retinal ganglion cell survival by suppressing Jun-mediated apoptosis to promote retinal neural circuit formation
Source: eLife. 2022 Mar 22;11:e74650. doi: 10.7554/eLife.74650 (PMC8940179; doi:10.7554/eLife.74650)
Supplement: Figure 2—source data 1. [file elife-74650-fig2-data1.xlsx]

## Sheet: Figure 2B
Percentage of ath5+ area/ total retina area			Unpaired t test with Welch's correction
wild-type sibling	strip1rw147		P value	<0.0001
23.4092	8.0436		P value summary	****
24.8229	4.76145		Significantly different (P < 0.05)?	Yes
25.9167	11.4418		One- or two-tailed P value?	Two-tailed
22.5751	8.48513		Welch-corrected t, df	t=11.26, df=6.185
	4.51809

## Sheet: Figure 2C
Number of ptf1a+ cells/ unified area			Unpaired t test with Welch's correction
wild-type sibling	strip1rw147		P value	0.6179
25	41		P value summary	ns
29	26		Significantly different (P < 0.05)?	No
35	20		One- or two-tailed P value?	Two-tailed
	22		Welch-corrected t, df	t=0.5261, df=5.931
	27

## Sheet: Figure 2D
Distribution of ptf1a+ cells/ unified area (n)
	INL					GCL
wild-type sibling	19	20	23			6	9	12
strip1rw147	13	4	5	7	6	28	22	15	15	21
Tukey's multiple comparisons test	Predicted (LS) mean diff.	95.00% CI of diff.	Below threshold?	Summary	Adjusted P Value
WT:INL vs. WT:GCL	11.67	1.883 to 21.45	Yes	*	0.0184
WT:INL vs. Strip1rw147:INL	13.67	4.916 to 22.42	Yes	**	0.0028
WT:INL vs. Strip1rw147:GCL	0.4667	-8.284 to 9.217	No	ns	0.9985
WT:GCL vs. Strip1rw147:INL	2	-6.751 to 10.75	No	ns	0.9032
WT:GCL vs. Strip1rw147:GCL	-11.2	-19.95 to -2.449	Yes	*	0.0117
Strip1rw147:INL vs. Strip1rw147:GCL	-13.2	-20.78 to -5.622	Yes	**	0.0011

## Sheet: Figure 2F
Number of Pax6+ cells/ retina				Unpaired t test with Welch's correction
wild-type sibling	strip1rw147			P value	0.6848
118	115			P value summary	ns
72	92			Significantly different (P < 0.05)?	No
61	75			One- or two-tailed P value?	Two-tailed
74	57			Welch-corrected t, df	t=0.4211, df=8.000
78	93

## Sheet: Figure 2G
Distribution of Pax6+ cells/ retina (%)
	INL+ve					GCL +ve
wild-type sibling	83.7209	88.4615	92.6471	91.8919	94.0299	16.2791	11.5385	7.35294	8.10811	5.97015
strip1rw147	34.8837	48.8095	72.8571	75.8065	46.9136	65.1163	51.1905	27.1429	24.1935	53.0864
Tukey's multiple comparisons test	Mean Diff.	95.00% CI of diff.	Below threshold?	Summary	Adjusted P Value
wt:INL+ve vs. wt:GCL +ve	80.3	57.01 to 103.6	Yes	****	<0.0001
wt:INL+ve vs. strip1rw147:INL+ve	34.3	11.01 to 57.58	Yes	**	0.0033
wt:INL+ve vs. strip1rw147:GCL +ve	46	22.72 to 69.29	Yes	***	0.0002
wt:GCL +ve vs. strip1rw147:INL+ve	-46	-69.29 to -22.72	Yes	***	0.0002
wt:GCL +ve vs. strip1rw147:GCL +ve	-34.3	-57.58 to -11.01	Yes	**	0.0033
strip1rw147:INL+ve vs. strip1rw147:GCL +ve	11.71	-11.58 to 35.00	No	ns	0.495

## Sheet: Figure 2I
Number of Prox1+ cells/ retina			Unpaired t test with Welch's correction
wild-type sibling	strip1rw147		P value	0.5298
241	229		P value summary	ns
176	260		Significantly different (P < 0.05)?	No
178	159		One- or two-tailed P value?	Two-tailed
184	168		Welch-corrected t, df	t=0.6578, df=7.700
145	189

## Sheet: Figure 2J
Distribution of Prox1+ cells/ retina (%)
	INL+ve					GCL +ve
wild-type sibling	100	100	100	100	100	0	0	0	0	0
strip1rw147	80.2083	93.0556	89.2086	96.875	87.6404	19.7917	6.94444	10.7914	3.125	12.3596
Tukey's multiple comparisons test	Mean Diff.	95.00% CI of diff.	Below threshold?	Summary	Adjusted P Value
wt:INL+ve vs. wt:GCL +ve	100	91.99 to 108.0	Yes	****	<0.0001
wt:INL+ve vs. strip1rw147:INL+ve	10.6	2.590 to 18.61	Yes	**	0.0079
wt:INL+ve vs. strip1rw147:GCL +ve	89.4	81.39 to 97.41	Yes	****	<0.0001
wt:GCL +ve vs. strip1rw147:INL+ve	-89.4	-97.41 to -81.39	Yes	****	<0.0001
wt:GCL +ve vs. strip1rw147:GCL +ve	-10.6	-18.61 to -2.590	Yes	**	0.0079
strip1rw147:INL+ve vs. strip1rw147:GCL +ve	78.8	70.78 to 86.81	Yes	****	<0.0001
