# Supplementary material for: Strip1 regulates retinal ganglion cell survival by suppressing Jun-mediated apoptosis to promote retinal neural circuit formation
Source: eLife. 2022 Mar 22;11:e74650. doi: 10.7554/eLife.74650 (PMC8940179; doi:10.7554/eLife.74650)
Supplement: Figure 3—figure supplement 1—source data 1. [file elife-74650-fig3-figsupp1-data1.xlsx]

## Sheet: Figure 3-figure supplement 1A
Number of TUNEL+ cells in GCL vs. rest of the retina in strip1rw147 mutant
	GCL					Rest of retina
36 hpf	1	5	0			0	0	0
48 hpf	35	24	35	11		5	1	0	3
60 hpf	46	59	29			1	12	5
72 hpf	49	20	29	52	45	10	26	7	12	4
96 hpf	1	2	0	3	0	13	18	2	5	5
Tukey's multiple comparisons test	Predicted (LS) mean diff.	95.00% CI of diff.	Below threshold?	Summary	Adjusted P Value
36 hpf:GCL vs. 36 hpf:Rest of retina	2	-21.70 to 25.70	No	ns	>0.9999
36 hpf:GCL vs. 48 hpf:GCL	-24.25	-46.42 to -2.077	Yes	*	0.0234
36 hpf:GCL vs. 48 hpf:Rest of retina	-0.25	-22.42 to 21.92	No	ns	>0.9999
36 hpf:GCL vs. 60 hpf :GCL	-42.67	-66.37 to -18.96	Yes	****	<0.0001
36 hpf:GCL vs. 60 hpf :Rest of retina	-4	-27.70 to 19.70	No	ns	0.9999
36 hpf:GCL vs. 72 hpf:GCL	-37	-58.20 to -15.80	Yes	****	<0.0001
36 hpf:GCL vs. 72 hpf:Rest of retina	-9.8	-31.00 to 11.40	No	ns	0.8487
36 hpf:GCL vs. 96 hpf:GCL	0.8	-20.40 to 22.00	No	ns	>0.9999
36 hpf:GCL vs. 96 hpf:Rest of retina	-6.6	-27.80 to 14.60	No	ns	0.9849
36 hpf:Rest of retina vs. 48 hpf:GCL	-26.25	-48.42 to -4.077	Yes	*	0.0108
36 hpf:Rest of retina vs. 48 hpf:Rest of retina	-2.25	-24.42 to 19.92	No	ns	>0.9999
36 hpf:Rest of retina vs. 60 hpf :GCL	-44.67	-68.37 to -20.96	Yes	****	<0.0001
36 hpf:Rest of retina vs. 60 hpf :Rest of retina	-6	-29.70 to 17.70	No	ns	0.9965
36 hpf:Rest of retina vs. 72 hpf:GCL	-39	-60.20 to -17.80	Yes	****	<0.0001
36 hpf:Rest of retina vs. 72 hpf:Rest of retina	-11.8	-33.00 to 9.402	No	ns	0.6699
36 hpf:Rest of retina vs. 96 hpf:GCL	-1.2	-22.40 to 20.00	No	ns	>0.9999
36 hpf:Rest of retina vs. 96 hpf:Rest of retina	-8.6	-29.80 to 12.60	No	ns	0.9229
48 hpf:GCL vs. 48 hpf:Rest of retina	24	3.472 to 44.53	Yes	*	0.0123
48 hpf:GCL vs. 60 hpf :GCL	-18.42	-40.59 to 3.757	No	ns	0.1706
48 hpf:GCL vs. 60 hpf :Rest of retina	20.25	-1.923 to 42.42	No	ns	0.0963
48 hpf:GCL vs. 72 hpf:GCL	-12.75	-32.22 to 6.725	No	ns	0.4577
48 hpf:GCL vs. 72 hpf:Rest of retina	14.45	-5.025 to 33.92	No	ns	0.293
48 hpf:GCL vs. 96 hpf:GCL	25.05	5.575 to 44.52	Yes	**	0.0044
48 hpf:GCL vs. 96 hpf:Rest of retina	17.65	-1.825 to 37.12	No	ns	0.1013
48 hpf:Rest of retina vs. 60 hpf :GCL	-42.42	-64.59 to -20.24	Yes	****	<0.0001
48 hpf:Rest of retina vs. 60 hpf :Rest of retina	-3.75	-25.92 to 18.42	No	ns	0.9999
48 hpf:Rest of retina vs. 72 hpf:GCL	-36.75	-56.22 to -17.28	Yes	****	<0.0001
48 hpf:Rest of retina vs. 72 hpf:Rest of retina	-9.55	-29.02 to 9.925	No	ns	0.8014
48 hpf:Rest of retina vs. 96 hpf:GCL	1.05	-18.42 to 20.52	No	ns	>0.9999
48 hpf:Rest of retina vs. 96 hpf:Rest of retina	-6.35	-25.82 to 13.12	No	ns	0.9795
60 hpf :GCL vs. 60 hpf :Rest of retina	38.67	14.96 to 62.37	Yes	***	0.0002
60 hpf :GCL vs. 72 hpf:GCL	5.667	-15.54 to 26.87	No	ns	0.9948
60 hpf :GCL vs. 72 hpf:Rest of retina	32.87	11.66 to 54.07	Yes	***	0.0004
60 hpf :GCL vs. 96 hpf:GCL	43.47	22.26 to 64.67	Yes	****	<0.0001
60 hpf :GCL vs. 96 hpf:Rest of retina	36.07	14.86 to 57.27	Yes	****	<0.0001
60 hpf :Rest of retina vs. 72 hpf:GCL	-33	-54.20 to -11.80	Yes	***	0.0004
60 hpf :Rest of retina vs. 72 hpf:Rest of retina	-5.8	-27.00 to 15.40	No	ns	0.9939
60 hpf :Rest of retina vs. 96 hpf:GCL	4.8	-16.40 to 26.00	No	ns	0.9985
60 hpf :Rest of retina vs. 96 hpf:Rest of retina	-2.6	-23.80 to 18.60	No	ns	>0.9999
72 hpf:GCL vs. 72 hpf:Rest of retina	27.2	8.839 to 45.56	Yes	***	0.0007
72 hpf:GCL vs. 96 hpf:GCL	37.8	19.44 to 56.16	Yes	****	<0.0001
72 hpf:GCL vs. 96 hpf:Rest of retina	30.4	12.04 to 48.76	Yes	***	0.0001
72 hpf:Rest of retina vs. 96 hpf:GCL	10.6	-7.761 to 28.96	No	ns	0.6251
72 hpf:Rest of retina vs. 96 hpf:Rest of retina	3.2	-15.16 to 21.56	No	ns	0.9998
96 hpf:GCL vs. 96 hpf:Rest of retina	-7.4	-25.76 to 10.96	No	ns	0.9256

## Sheet: Figure 3-figure supplement 1B
Percentage of area of GCL/total retina area
	wild-type sibling					strip1rw147
36 hpf	21.776	21.4317	28.1196			22.5612	13.4631	19.0569
48 hpf	24.6647	21.6642	20.295			20.1721	20.2138	27.1098
60 hpf	21.4708	20.0063	24.1588			16.5348	20.3838	23.089
72 hpf	23.4257	24.1701	20.6432	21.8278	22.6816	32.2568	27.1564	26.6253	19.987	19.8211
96 hpf	18.5122	26.4004	19.202			18.9736	15.6109	24.2794	17.3795
Tukey's multiple comparisons test	Predicted (LS) mean diff.	95.00% CI of diff.	Below threshold?	Summary	Adjusted P Value
36 hpf:WT vs. 36 hpf:strip1rw147	5.415	-5.048 to 15.88	No	ns	0.7338
36 hpf:WT vs. 48 hpf:WT	1.568	-8.895 to 12.03	No	ns	>0.9999
36 hpf:WT vs. 48 hpf:strip1rw147	1.277	-9.186 to 11.74	No	ns	>0.9999
36 hpf:WT vs. 60 hpf :WT	1.897	-8.566 to 12.36	No	ns	0.9997
36 hpf:WT vs. 60 hpf :strip1rw147	3.773	-6.690 to 14.24	No	ns	0.9562
36 hpf:WT vs. 72 hpf:WT	1.226	-8.132 to 10.58	No	ns	>0.9999
36 hpf:WT vs. 72 hpf:strip1rw147	-1.394	-10.75 to 7.965	No	ns	>0.9999
36 hpf:WT vs. 96 hpf:WT	2.404	-8.059 to 12.87	No	ns	0.998
36 hpf:WT vs. 96 hpf:strip1rw147	4.715	-5.072 to 14.50	No	ns	0.8023
36 hpf:strip1rw147 vs. 48 hpf:WT	-3.848	-14.31 to 6.615	No	ns	0.9508
36 hpf:strip1rw147 vs. 48 hpf:strip1rw147	-4.138	-14.60 to 6.325	No	ns	0.9255
36 hpf:strip1rw147 vs. 60 hpf :WT	-3.518	-13.98 to 6.945	No	ns	0.9714
36 hpf:strip1rw147 vs. 60 hpf :strip1rw147	-1.642	-12.11 to 8.821	No	ns	>0.9999
36 hpf:strip1rw147 vs. 72 hpf:WT	-4.189	-13.55 to 5.169	No	ns	0.8588
36 hpf:strip1rw147 vs. 72 hpf:strip1rw147	-6.809	-16.17 to 2.550	No	ns	0.3057
36 hpf:strip1rw147 vs. 96 hpf:WT	-3.011	-13.47 to 7.452	No	ns	0.9898
36 hpf:strip1rw147 vs. 96 hpf:strip1rw147	-0.7004	-10.49 to 9.087	No	ns	>0.9999
48 hpf:WT vs. 48 hpf:strip1rw147	-0.2906	-10.75 to 10.17	No	ns	>0.9999
48 hpf:WT vs. 60 hpf :WT	0.3294	-10.13 to 10.79	No	ns	>0.9999
48 hpf:WT vs. 60 hpf :strip1rw147	2.205	-8.258 to 12.67	No	ns	0.999
48 hpf:WT vs. 72 hpf:WT	-0.3417	-9.700 to 9.017	No	ns	>0.9999
48 hpf:WT vs. 72 hpf:strip1rw147	-2.961	-12.32 to 6.397	No	ns	0.9807
48 hpf:WT vs. 96 hpf:WT	0.8364	-9.627 to 11.30	No	ns	>0.9999
48 hpf:WT vs. 96 hpf:strip1rw147	3.147	-6.640 to 12.93	No	ns	0.9785
48 hpf:strip1rw147 vs. 60 hpf :WT	0.62	-9.843 to 11.08	No	ns	>0.9999
48 hpf:strip1rw147 vs. 60 hpf :strip1rw147	2.496	-7.967 to 12.96	No	ns	0.9974
48 hpf:strip1rw147 vs. 72 hpf:WT	-0.05107	-9.410 to 9.307	No	ns	>0.9999
48 hpf:strip1rw147 vs. 72 hpf:strip1rw147	-2.671	-12.03 to 6.688	No	ns	0.9904
48 hpf:strip1rw147 vs. 96 hpf:WT	1.127	-9.336 to 11.59	No	ns	>0.9999
48 hpf:strip1rw147 vs. 96 hpf:strip1rw147	3.438	-6.350 to 13.23	No	ns	0.9626
60 hpf :WT vs. 60 hpf :strip1rw147	1.876	-8.587 to 12.34	No	ns	0.9997
60 hpf :WT vs. 72 hpf:WT	-0.6711	-10.03 to 8.687	No	ns	>0.9999
60 hpf :WT vs. 72 hpf:strip1rw147	-3.291	-12.65 to 6.068	No	ns	0.9623
60 hpf :WT vs. 96 hpf:WT	0.5071	-9.956 to 10.97	No	ns	>0.9999
60 hpf :WT vs. 96 hpf:strip1rw147	2.818	-6.970 to 12.61	No	ns	0.9898
60 hpf :strip1rw147 vs. 72 hpf:WT	-2.547	-11.91 to 6.811	No	ns	0.9931
60 hpf :strip1rw147 vs. 72 hpf:strip1rw147	-5.167	-14.53 to 4.192	No	ns	0.6619
60 hpf :strip1rw147 vs. 96 hpf:WT	-1.369	-11.83 to 9.094	No	ns	>0.9999
60 hpf :strip1rw147 vs. 96 hpf:strip1rw147	0.9417	-8.846 to 10.73	No	ns	>0.9999
72 hpf:WT vs. 72 hpf:strip1rw147	-2.62	-10.72 to 5.485	No	ns	0.9778
72 hpf:WT vs. 96 hpf:WT	1.178	-8.180 to 10.54	No	ns	>0.9999
72 hpf:WT vs. 96 hpf:strip1rw147	3.489	-5.107 to 12.09	No	ns	0.9143
72 hpf:strip1rw147 vs. 96 hpf:WT	3.798	-5.561 to 13.16	No	ns	0.9143
72 hpf:strip1rw147 vs. 96 hpf:strip1rw147	6.108	-2.488 to 14.70	No	ns	0.3349
96 hpf:WT vs. 96 hpf:strip1rw147	2.311	-7.477 to 12.10	No	ns	0.9976

## Sheet: Figure 3-figure supplement 1D
Percentage of AO+ area/ total retina area				Mann Whitney test
wild-type sibling	strip1crisprΔ10			P value	0.0159
0.357184	2.72564			Exact or approximate P value?	Exact
0.243135	1.89032			P value summary	*
0.11663	3.88569			Significantly different (P < 0.05)?	Yes
0.318207	1.98857			One- or two-tailed P value?	Two-tailed
	1.80804			Sum of ranks in column A,B	10 , 35
				Mann-Whitney U	0

## Sheet: Figure 3-figure supplement 1F
Number of TUNEL+ cells in the optic tectum				Unpaired t test with Welch's correction
wt	strip1rw147			P value	0.034
16	33			P value summary	*
19	49			Significantly different (P < 0.05)?	Yes
3	30			One- or two-tailed P value?	Two-tailed
				Welch-corrected t, df	t=3.214, df=3.873
