# Supplementary material for: Strip1 regulates retinal ganglion cell survival by suppressing Jun-mediated apoptosis to promote retinal neural circuit formation
Source: eLife. 2022 Mar 22;11:e74650. doi: 10.7554/eLife.74650 (PMC8940179; doi:10.7554/eLife.74650)
Supplement: Figure 3—source data 1. [file elife-74650-fig3-data1.xlsx]

## Sheet: Figure 3B
Number of TUNEL+ cells in GCL
	wild-type sibling					strip1rw147
36 hpf	0	1	0			1	5	0
48 hpf	0	0	0			35	24	35	11
60 hpf	0	2	1			46	59	29
72 hpf	1	2	3	1	0	49	20	29	52	45
96 hpf	2	0	0	1		1	2	0	3	0
Tukey's multiple comparisons test	Predicted (LS) mean diff.	95.00% CI of diff.	Below threshold?	Summary	Adjusted P Value
36 hpf:WT vs. 36 hpf:strip1rw147	-1.667	-23.10 to 19.77	No	ns	>0.9999
36 hpf:WT vs. 48 hpf:WT	0.3333	-21.10 to 21.77	No	ns	>0.9999
36 hpf:WT vs. 48 hpf:strip1rw147	-25.92	-45.97 to -5.865	Yes	**	0.0043
36 hpf:WT vs. 60 hpf :WT	-0.6667	-22.10 to 20.77	No	ns	>0.9999
36 hpf:WT vs. 60 hpf :strip1rw147	-44.33	-65.77 to -22.90	Yes	****	<0.0001
36 hpf:WT vs. 72 hpf:WT	-1.067	-20.24 to 18.11	No	ns	>0.9999
36 hpf:WT vs. 72 hpf:strip1rw147	-38.67	-57.84 to -19.49	Yes	****	<0.0001
36 hpf:WT vs. 96 hpf:WT	-0.4167	-20.47 to 19.63	No	ns	>0.9999
36 hpf:WT vs. 96 hpf:strip1rw147	-0.8667	-20.04 to 18.31	No	ns	>0.9999
36 hpf:strip1rw147 vs. 48 hpf:WT	2	-19.44 to 23.44	No	ns	>0.9999
36 hpf:strip1rw147 vs. 48 hpf:strip1rw147	-24.25	-44.30 to -4.199	Yes	**	0.0089
36 hpf:strip1rw147 vs. 60 hpf :WT	1	-20.44 to 22.44	No	ns	>0.9999
36 hpf:strip1rw147 vs. 60 hpf :strip1rw147	-42.67	-64.10 to -21.23	Yes	****	<0.0001
36 hpf:strip1rw147 vs. 72 hpf:WT	0.6	-18.57 to 19.77	No	ns	>0.9999
36 hpf:strip1rw147 vs. 72 hpf:strip1rw147	-37	-56.17 to -17.83	Yes	****	<0.0001
36 hpf:strip1rw147 vs. 96 hpf:WT	1.25	-18.80 to 21.30	No	ns	>0.9999
36 hpf:strip1rw147 vs. 96 hpf:strip1rw147	0.8	-18.37 to 19.97	No	ns	>0.9999
48 hpf:WT vs. 48 hpf:strip1rw147	-26.25	-46.30 to -6.199	Yes	**	0.0037
48 hpf:WT vs. 60 hpf :WT	-1	-22.44 to 20.44	No	ns	>0.9999
48 hpf:WT vs. 60 hpf :strip1rw147	-44.67	-66.10 to -23.23	Yes	****	<0.0001
48 hpf:WT vs. 72 hpf:WT	-1.4	-20.57 to 17.77	No	ns	>0.9999
48 hpf:WT vs. 72 hpf:strip1rw147	-39	-58.17 to -19.83	Yes	****	<0.0001
48 hpf:WT vs. 96 hpf:WT	-0.75	-20.80 to 19.30	No	ns	>0.9999
48 hpf:WT vs. 96 hpf:strip1rw147	-1.2	-20.37 to 17.97	No	ns	>0.9999
48 hpf:strip1rw147 vs. 60 hpf :WT	25.25	5.199 to 45.30	Yes	**	0.0058
48 hpf:strip1rw147 vs. 60 hpf :strip1rw147	-18.42	-38.47 to 1.635	No	ns	0.0921
48 hpf:strip1rw147 vs. 72 hpf:WT	24.85	7.239 to 42.46	Yes	**	0.0015
48 hpf:strip1rw147 vs. 72 hpf:strip1rw147	-12.75	-30.36 to 4.861	No	ns	0.3193
48 hpf:strip1rw147 vs. 96 hpf:WT	25.5	6.936 to 44.06	Yes	**	0.0021
48 hpf:strip1rw147 vs. 96 hpf:strip1rw147	25.05	7.439 to 42.66	Yes	**	0.0014
60 hpf :WT vs. 60 hpf :strip1rw147	-43.67	-65.10 to -22.23	Yes	****	<0.0001
60 hpf :WT vs. 72 hpf:WT	-0.4	-19.57 to 18.77	No	ns	>0.9999
60 hpf :WT vs. 72 hpf:strip1rw147	-38	-57.17 to -18.83	Yes	****	<0.0001
60 hpf :WT vs. 96 hpf:WT	0.25	-19.80 to 20.30	No	ns	>0.9999
60 hpf :WT vs. 96 hpf:strip1rw147	-0.2	-19.37 to 18.97	No	ns	>0.9999
60 hpf :strip1rw147 vs. 72 hpf:WT	43.27	24.09 to 62.44	Yes	****	<0.0001
60 hpf :strip1rw147 vs. 72 hpf:strip1rw147	5.667	-13.51 to 24.84	No	ns	0.9889
60 hpf :strip1rw147 vs. 96 hpf:WT	43.92	23.87 to 63.97	Yes	****	<0.0001
60 hpf :strip1rw147 vs. 96 hpf:strip1rw147	43.47	24.29 to 62.64	Yes	****	<0.0001
72 hpf:WT vs. 72 hpf:strip1rw147	-37.6	-54.20 to -21.00	Yes	****	<0.0001
72 hpf:WT vs. 96 hpf:WT	0.65	-16.96 to 18.26	No	ns	>0.9999
72 hpf:WT vs. 96 hpf:strip1rw147	0.2	-16.40 to 16.80	No	ns	>0.9999
72 hpf:strip1rw147 vs. 96 hpf:WT	38.25	20.64 to 55.86	Yes	****	<0.0001
72 hpf:strip1rw147 vs. 96 hpf:strip1rw147	37.8	21.20 to 54.40	Yes	****	<0.0001
96 hpf:WT vs. 96 hpf:strip1rw147	-0.45	-18.06 to 17.16	No	ns	>0.9999

## Sheet: Figure 3C
Percentage of ath5+ area/ total retina area
	wild-type sibling					strip1rw147
36 hpf	15.7493	10.3869	15.7139			16.3223	8.90237	16.3906
48 hpf	16.0099	17.6326	16.3483			9.53855	16.6114	12.0617	12.0526
60 hpf	19.0753	21.1477	17.152			9.67189	11.3797	6.94773
72 hpf	20.5373	20.2968	17.3038	19.2168	20.5245	7.27353	3.92397	8.87002	8.47411	11.0874
96 hpf	21.9998	17.0873	25.3855			2.80994	6.49341	7.95162	3.40977
Tukey's multiple comparisons test	Predicted (LS) mean diff.	95.00% CI of diff.	Below threshold?	Summary	Adjusted P Value
36 hpf:WT vs. 36 hpf:strip1rw147	0.0783	-7.535 to 7.691	No	ns	>0.9999
36 hpf:WT vs. 48 hpf:WT	-2.714	-10.33 to 4.899	No	ns	0.9602
36 hpf:WT vs. 48 hpf:strip1rw147	1.384	-5.737 to 8.505	No	ns	0.9995
36 hpf:WT vs. 60 hpf :WT	-5.175	-12.79 to 2.438	No	ns	0.3953
36 hpf:WT vs. 60 hpf :strip1rw147	4.617	-2.996 to 12.23	No	ns	0.5478
36 hpf:WT vs. 72 hpf:WT	-5.626	-12.43 to 1.183	No	ns	0.1711
36 hpf:WT vs. 72 hpf:strip1rw147	6.024	-0.7849 to 12.83	No	ns	0.1158
36 hpf:WT vs. 96 hpf:WT	-7.541	-15.15 to 0.07206	No	ns	0.0537
36 hpf:WT vs. 96 hpf:strip1rw147	8.784	1.663 to 15.91	Yes	**	0.0075
36 hpf:strip1rw147 vs. 48 hpf:WT	-2.792	-10.40 to 4.821	No	ns	0.9528
36 hpf:strip1rw147 vs. 48 hpf:strip1rw147	1.306	-5.816 to 8.427	No	ns	0.9997
36 hpf:strip1rw147 vs. 60 hpf :WT	-5.253	-12.87 to 2.360	No	ns	0.3755
36 hpf:strip1rw147 vs. 60 hpf :strip1rw147	4.539	-3.074 to 12.15	No	ns	0.5702
36 hpf:strip1rw147 vs. 72 hpf:WT	-5.704	-12.51 to 1.105	No	ns	0.1588
36 hpf:strip1rw147 vs. 72 hpf:strip1rw147	5.946	-0.8632 to 12.76	No	ns	0.1253
36 hpf:strip1rw147 vs. 96 hpf:WT	-7.619	-15.23 to -0.006244	Yes	*	0.0497
36 hpf:strip1rw147 vs. 96 hpf:strip1rw147	8.706	1.584 to 15.83	Yes	**	0.0083
48 hpf:WT vs. 48 hpf:strip1rw147	4.098	-3.024 to 11.22	No	ns	0.6155
48 hpf:WT vs. 60 hpf :WT	-2.461	-10.07 to 5.152	No	ns	0.9784
48 hpf:WT vs. 60 hpf :strip1rw147	7.331	-0.2824 to 14.94	No	ns	0.0661
48 hpf:WT vs. 72 hpf:WT	-2.912	-9.721 to 3.897	No	ns	0.8897
48 hpf:WT vs. 72 hpf:strip1rw147	8.738	1.929 to 15.55	Yes	**	0.0049
48 hpf:WT vs. 96 hpf:WT	-4.827	-12.44 to 2.786	No	ns	0.4884
48 hpf:WT vs. 96 hpf:strip1rw147	11.5	4.376 to 18.62	Yes	***	0.0003
48 hpf:strip1rw147 vs. 60 hpf :WT	-6.559	-13.68 to 0.5623	No	ns	0.0897
48 hpf:strip1rw147 vs. 60 hpf :strip1rw147	3.233	-3.888 to 10.35	No	ns	0.8519
48 hpf:strip1rw147 vs. 72 hpf:WT	-7.01	-13.26 to -0.7551	Yes	*	0.0193
48 hpf:strip1rw147 vs. 72 hpf:strip1rw147	4.64	-1.614 to 10.89	No	ns	0.2848
48 hpf:strip1rw147 vs. 96 hpf:WT	-8.925	-16.05 to -1.804	Yes	**	0.0064
48 hpf:strip1rw147 vs. 96 hpf:strip1rw147	7.4	0.8069 to 13.99	Yes	*	0.019
60 hpf :WT vs. 60 hpf :strip1rw147	9.792	2.179 to 17.40	Yes	**	0.0048
60 hpf :WT vs. 72 hpf:WT	-0.4508	-7.260 to 6.358	No	ns	>0.9999
60 hpf :WT vs. 72 hpf:strip1rw147	11.2	4.390 to 18.01	Yes	***	0.0002
60 hpf :WT vs. 96 hpf:WT	-2.366	-9.979 to 5.247	No	ns	0.9834
60 hpf :WT vs. 96 hpf:strip1rw147	13.96	6.838 to 21.08	Yes	****	<0.0001
60 hpf :strip1rw147 vs. 72 hpf:WT	-10.24	-17.05 to -3.434	Yes	***	0.0007
60 hpf :strip1rw147 vs. 72 hpf:strip1rw147	1.407	-5.402 to 8.216	No	ns	0.9992
60 hpf :strip1rw147 vs. 96 hpf:WT	-12.16	-19.77 to -4.545	Yes	***	0.0003
60 hpf :strip1rw147 vs. 96 hpf:strip1rw147	4.167	-2.954 to 11.29	No	ns	0.5943
72 hpf:WT vs. 72 hpf:strip1rw147	11.65	5.753 to 17.55	Yes	****	<0.0001
72 hpf:WT vs. 96 hpf:WT	-1.915	-8.724 to 4.894	No	ns	0.9916
72 hpf:WT vs. 96 hpf:strip1rw147	14.41	8.155 to 20.66	Yes	****	<0.0001
72 hpf:strip1rw147 vs. 96 hpf:WT	-13.57	-20.37 to -6.756	Yes	****	<0.0001
72 hpf:strip1rw147 vs. 96 hpf:strip1rw147	2.76	-3.495 to 9.014	No	ns	0.871
96 hpf:WT vs. 96 hpf:strip1rw147	16.32	9.203 to 23.45	Yes	****	<0.0001

## Sheet: Figure 3F
Percentage of TUNEL+ donor RGCs/total donor RGCs				Mann Whitney test
WT to WT	strip1rw147 to WT			P value	0.0286
0	22.2222			Exact or approximate P value?	Exact
0	30			P value summary	*
0	18.1818			Significantly different (P < 0.05)?	Yes
0	22.2222			One- or two-tailed P value?	Two-tailed
				Sum of ranks in column A,B	10 , 26
				Mann-Whitney U	0
