# Supplementary material for: Strip1 regulates retinal ganglion cell survival by suppressing Jun-mediated apoptosis to promote retinal neural circuit formation
Source: eLife. 2022 Mar 22;11:e74650. doi: 10.7554/eLife.74650 (PMC8940179; doi:10.7554/eLife.74650)
Supplement: Figure 4—source data 1. [file elife-74650-fig4-data1.xlsx]

## Sheet: Figure 4D
Distribution of transplanted ptf1a+ cells/ transplanted colomn (%)
	Apical side						Basal side
WT to WT	100	87.5	100	75			0	12.5	0	25
WT to strip1rw147	36.3636	38.8889	33.3333	28.5714			54.5455	61.1111	66.6667	71.4286
strip1rw147 to WT	90	71.4286	61.5385	82.3529	84.6154	92.3077	10	28.5714	38.4615	15.3846	7.69231	17.6471
Tukey's multiple comparisons test	Predicted (LS) mean diff.	95.00% CI of diff.	Below threshold?	Summary	Adjusted P Value
WT to WT:Apical side vs. WT to WT:Basal side	81.25	57.95 to 104.5	Yes	****	<0.0001
WT to WT:Apical side vs. WT to strip1rw147:Apical side	56.34	33.04 to 79.63	Yes	****	<0.0001
WT to WT:Apical side vs. WT to strip1rw147:Basal side	27.19	3.891 to 50.48	Yes	*	0.016
WT to WT:Apical side vs. strip1rw147 to WT:Apical side	10.25	-11.02 to 31.52	No	ns	0.6668
WT to WT:Apical side vs. strip1rw147 to WT:Basal side	71	49.73 to 92.27	Yes	****	<0.0001
WT to WT:Basal side vs. WT to strip1rw147:Apical side	-24.91	-48.21 to -1.618	Yes	*	0.0315
WT to WT:Basal side vs. WT to strip1rw147:Basal side	-54.06	-77.36 to -30.77	Yes	****	<0.0001
WT to WT:Basal side vs. strip1rw147 to WT:Apical side	-71	-92.27 to -49.73	Yes	****	<0.0001
WT to WT:Basal side vs. strip1rw147 to WT:Basal side	-10.25	-31.52 to 11.02	No	ns	0.6668
WT to strip1rw147:Apical side vs. WT to strip1rw147:Basal side	-29.15	-52.44 to -5.852	Yes	**	0.0088
WT to strip1rw147:Apical side vs. strip1rw147 to WT:Apical side	-46.08	-67.35 to -24.82	Yes	****	<0.0001
WT to strip1rw147:Apical side vs. strip1rw147 to WT:Basal side	14.66	-6.603 to 35.93	No	ns	0.3006
WT to strip1rw147:Basal side vs. strip1rw147 to WT:Apical side	-16.94	-38.20 to 4.331	No	ns	0.1729
WT to strip1rw147:Basal side vs. strip1rw147 to WT:Basal side	43.81	22.55 to 65.08	Yes	****	<0.0001
strip1rw147 to WT:Apical side vs. strip1rw147 to WT:Basal side	60.75	41.73 to 79.77	Yes	****	<0.0001
