# Supplementary material for: Strip1 regulates retinal ganglion cell survival by suppressing Jun-mediated apoptosis to promote retinal neural circuit formation
Source: eLife. 2022 Mar 22;11:e74650. doi: 10.7554/eLife.74650 (PMC8940179; doi:10.7554/eLife.74650)
Supplement: Figure 5—figure supplement 2—source data 2. [file elife-74650-fig5-figsupp2-data2.xlsx]

## Sheet: Recovered_Sheet1
Normalized band intensity to β-actin loading control				Mann Whitney test
STD-MO	MO-strn3			P value	0.0286
1	0.30243			Exact or approximate P value?	Exact
1.75245	0.259189			P value summary	*
2.21771	0.38271			Significantly different (P < 0.05)?	Yes
1.40008	0.185675			One- or two-tailed P value?	Two-tailed
				Sum of ranks in column A,B	26 , 10
				Mann-Whitney U	0
