# Supplementary material for: Strip1 regulates retinal ganglion cell survival by suppressing Jun-mediated apoptosis to promote retinal neural circuit formation
Source: eLife. 2022 Mar 22;11:e74650. doi: 10.7554/eLife.74650 (PMC8940179; doi:10.7554/eLife.74650)
Supplement: Figure 5—source data 2. [file elife-74650-fig5-data2.xlsx]

## Sheet: 6 ptns enriched in both
Protein FDR Confidence: Combined	Exp. q-value: Combined	Accession	Description	Gene name	Abundance Ratio: (WT) / (CTRL)	Abundance Ratio: (WT) / (MUT)	Abundance Ratio Adj. P-Value: (WT) / (CTRL)	Abundance Ratio Adj. P-Value: (WT) / (MUT)	Abundances (Normalized): F1: Sample, CTRL, 1	Abundances (Normalized): F2: Sample, CTRL, 2	Abundances (Normalized): F3: Sample, MUT, 3	Abundances (Normalized): F4: Sample, MUT, 4	Abundances (Normalized): F5: Sample, MUT, 5	Abundances (Normalized): F6: Sample, WT, 6	Abundances (Normalized): F7: Sample, WT, 7	Abundances (Normalized): F8: Sample, WT, 8	Abundance: F1: Sample, CTRL, 1	Abundance: F2: Sample, CTRL, 2	Abundance: F3: Sample, MUT, 3	Abundance: F4: Sample, MUT, 4	Abundance: F5: Sample, MUT, 5	Abundance: F6: Sample, WT, 6	Abundance: F7: Sample, WT, 7	Abundance: F8: Sample, WT, 8
High	0	F1R1W1	Striatin, calmodulin-binding protein 3 OS=Danio rerio OX=7955 GN=strn3 PE=1 SV=1	strn3	27.748	7.824	1.21569e-16	3.46667e-16	17511.3	10237.9	16135.1	62393.2	47485	1.63256e+06	222385	973913	13090	7207.39	12700.5	34346.3	27776.4	1.14197e+06	222385	622128
High	0	A0A2R8QGU6	Striatin, calmodulin-binding protein 4 OS=Danio rerio OX=7955 GN=strn4 PE=1 SV=1	strn4	100	100	1.21569e-16	3.46667e-16						166267	119676	60095.3						116303	119676	38388.4
High	0	A0A2R8RT71	CTTNBP2 N-terminal-like b OS=Danio rerio OX=7955 GN=cttnbp2nlb PE=1 SV=1	cttnbp2nlb	14.103	3.698	2.7014e-13	4.34669e-08		17757.4	60726.1	86436.4		747001	246467	516072		12501	47799.7	47581.6		522524	246467	329663
Medium	0.015	A0A0R4ISE8	Im:6912630 OS=Danio rerio OX=7955 GN=im:6912630 PE=3 SV=1	SIKE1	5.575	2.952	1.63197e-05	3.67509e-06	28560		32498.1	74178.6	65555.6	159013	159209	218960	21349.1		25580.4	40834	38346.8	111229	159209	139870
Medium	0.022	E7FGC2	Structural maintenance of chromosomes protein OS=Danio rerio OX=7955 GN=smc4 PE=1 SV=2	smc4	100	2.092	1.21569e-16	0.000964438			40554.9	65628.6	96061.6	80156.1		212782			31922.2	36127.3	56191.3	56068.9		135924
Medium	0.026	F1QFV1	Cortactin-binding protein 2 OS=Danio rerio OX=7955 GN=cttnbp2 PE=4 SV=1	cttnbp2	100	100	1.21569e-16	3.46667e-16						133800	17125.9	125775						93592.9	17125.9	80344.2

## Sheet: 47 ptns enriched in wt to ctrl
Protein FDR Confidence: Combined	Exp. q-value: Combined	Accession	Description	Abundance Ratio: (WT) / (CTRL)	Abundance Ratio: (WT) / (MUT)	Abundance Ratio Adj. P-Value: (WT) / (CTRL)	Abundance Ratio Adj. P-Value: (WT) / (MUT)	Abundances (Normalized): F1: Sample, CTRL, 1	Abundances (Normalized): F2: Sample, CTRL, 2	Abundances (Normalized): F3: Sample, MUT, 3	Abundances (Normalized): F4: Sample, MUT, 4	Abundances (Normalized): F5: Sample, MUT, 5	Abundances (Normalized): F6: Sample, WT, 6	Abundances (Normalized): F7: Sample, WT, 7	Abundances (Normalized): F8: Sample, WT, 8	Abundance: F1: Sample, CTRL, 1	Abundance: F2: Sample, CTRL, 2	Abundance: F3: Sample, MUT, 3	Abundance: F4: Sample, MUT, 4	Abundance: F5: Sample, MUT, 5	Abundance: F6: Sample, WT, 6	Abundance: F7: Sample, WT, 7	Abundance: F8: Sample, WT, 8
High	0	F1R2T3	Phosvitin OS=Danio rerio OX=7955 GN=vtg7 PE=1 SV=1	100	0.256	1.2157e-16	0.0456992			64642.6	125059	346729	54505.5	7904.62	88918.4			50882.5	68842.9	202820	38126.4	7904.62	56800.5
High	0	F1R9D2	Premelanosome protein a OS=Danio rerio OX=7955 GN=pmela PE=4 SV=1	100	0.226	1.2157e-16	0.0119394			51782.1	147184	865626	120137	58713.5	40623.5			40759.6	81022	506349	84035.2	58713.5	25950
High	0	Q6PBT1	40S ribosomal protein S27 OS=Danio rerio OX=7955 GN=rps27.2 PE=1 SV=1	100	0.557	1.2157e-16	0.976887			225260	643219	678031	358536	92692	592798			177310	354080	396615	250794	92692	378675
High	0	A0A2R8QGU6	Striatin, calmodulin-binding protein 4 OS=Danio rerio OX=7955 GN=strn4 PE=1 SV=1	100	100	1.2157e-16	3.4667e-16						166267	119676	60095.3						116303	119676	38388.4
High	0	Q6DRK7	Serine/threonine-protein kinase PLK OS=Danio rerio OX=7955 GN=plk1 PE=1 SV=1	100	0.916	1.2157e-16	0.924552			212042	895174	230329	236570	194189	226358			166906	492777	134731	165480	194189	144596
High	0	Q5U386	Protein-serine/threonine phosphatase OS=Danio rerio OX=7955 GN=ppm1bb PE=1 SV=1	100	0.514	1.2157e-16	0.960447			425133	384742	710195	307714	95218.8	306732			334638	211793	415430	215245	95218.8	195938
High	0	Q6NYF7	ATP synthase-coupling factor 6, mitochondrial OS=Danio rerio OX=7955 GN=atp5pf PE=1 SV=1	100	0.463	1.2157e-16	0.960447			114467	361016	485000	138827	52960	257543			90101.4	198733	283701	97109	52960	164517
High	0.001	A0A2R8QHP5	Abasic site processing protein HMCES OS=Danio rerio OX=7955 GN=hmces PE=1 SV=1	100	1.601	1.2157e-16	0.0265083			49277	250900	262580	401580	53251.4	433668			38787.7	138116	153597	280904	53251.4	277024
High	0.001	Q7ZUG6	60S ribosomal protein L30 OS=Danio rerio OX=7955 GN=rpl30 PE=1 SV=1	100	0.699	1.2157e-16	0.976887			404069	725157	1.02901e+06	507041	406008	580741			318057	399186	601919	354673	406008	370973
High	0.001	B3DK73	Poly(U)-specific endoribonuclease OS=Danio rerio OX=7955 GN=si:dkey-222f8.3 PE=1 SV=1	100	0.641	1.2157e-16	0.993002			235311	322417	245416	181694	25595.9	206732			185222	177485	143557	127094	25595.9	132059
High	0.002	E7F5B6	Si:ch211-235e9.8 OS=Danio rerio OX=7955 GN=mgarpa PE=4 SV=1	100	0.509	1.2157e-16	0.960447			433460	572888	903302	307293	220539	382775			341192	315364	528388	214950	220539	244514
High	0.003	Q5RH85	Activating transcription factor 6 OS=Danio rerio OX=7955 GN=atf6 PE=4 SV=2	100	1.424	1.2157e-16	0.080079			330253	1.03811e+06	1.22869e+06	1.54022e+06		1.41955e+06			259954	571460	718724	1.07738e+06		906799
High	0.007	F1QYY6	CREB-regulated transcription coactivator 1b OS=Danio rerio OX=7955 GN=crtc1b PE=3 SV=3	100	0.478	1.2157e-16	0.960447			226895	298669	486049		119769	210446			178597	164412	284315		119769	134432
High	0.007	B0S6J8	Ankyrin repeat domain 10b OS=Danio rerio OX=7955 GN=ankrd10b PE=4 SV=1	100	0.393	1.2157e-16	0.787093			210813	336181	137667	131978	61867.3	73834.4			165938	185061	80528.7	92318.2	61867.3	47164.9
High	0.01	Q3B732	High mobility group nucleosomal-binding domain 2 OS=Danio rerio OX=7955 GN=hmgn2 PE=1 SV=1	100	0.264	1.2157e-16	0.0603331			465953	1.33603e+06	977554	198818	123155	359419			366769	735459	571821	139073	123155	229594
High	0.01	F1Q8U2	Ubiquilin 4 OS=Danio rerio OX=7955 GN=ubqln4 PE=1 SV=1	100	0.223	1.2157e-16	0.0106961			247963	376092	163685	108356		28238.6			195180	207032	95747.8	75794.5		18038.6
Medium	0.012	A0A0B4J1A6	IGF-II mRNA-binding protein 1 OS=Danio rerio OX=7955 GN=igf2bp1 PE=1 SV=1	100	0.352	1.2157e-16	0.500151			58107	189046	215168	128598	12071.8				45738.1	104066	125863	89953.7	12071.8
Medium	0.015	A0A140LGC3	Si:ch211-276i12.11 OS=Danio rerio OX=7955 GN=si:ch211-276i12.11 PE=1 SV=1	100	0.884	1.2157e-16	0.960447			344385	1.04569e+06	499496	742538	304326	504240			271078	575635	292181	519402	304326	322105
Medium	0.015	Q6P937	Clathrin light chain OS=Danio rerio OX=7955 GN=clta PE=1 SV=1	100	0.786	1.2157e-16	0.960447			540885	1.00211e+06	1.67336e+06	787723	431816	1.05015e+06			425750	551642	978832	551009	431816	670826
Medium	0.015	Q5TYY5	Aldo-keto reductase family 1, member B1 (aldose reductase), tandem duplicate 1 OS=Danio rerio OX=7955 GN=akr1b1.1 PE=1 SV=2	100	0.418	1.2157e-16	0.893231			41986.6	27042.4	116384			17566.6			33049.2	14886.3	68079.1			11221.4
Medium	0.022	E7FGC2	Structural maintenance of chromosomes protein OS=Danio rerio OX=7955 GN=smc4 PE=1 SV=2	100	2.092	1.2157e-16	0.00096444			40554.9	65628.6	96061.6	80156.1		212782			31922.2	36127.3	56191.3	56068.9		135924
Medium	0.022	F1Q5J2	Mitogen-activated protein kinase kinase kinase OS=Danio rerio OX=7955 GN=map3k10 PE=3 SV=1	100	0.968	1.2157e-16	0.857614		12762.3	1.1467e+06	1.3449e+06	1.95117e+06	1.88934e+06	107738	1.73309e+06		8984.52	902608	740340	1.14134e+06	1.32159e+06	107738	1.10708e+06
Medium	0.026	F1QFV1	Cortactin-binding protein 2 OS=Danio rerio OX=7955 GN=cttnbp2 PE=4 SV=1	100	100	1.2157e-16	3.4667e-16						133800	17125.9	125775						93592.9	17125.9	80344.2
Medium	0.026	E7F111	Guanylate cyclase OS=Danio rerio OX=7955 GN=gc2 PE=3 SV=1	100	0.739	1.2157e-16	0.960447			722981	1.24483e+06	1.39423e+06	919458	650685	953992			569084	685258	815555	643158	650685	609403
Medium	0.026	A0A2R8Q185	Eukaryotic translation initiation factor 4E-binding protein 1 OS=Danio rerio OX=7955 GN=eif4ebp1 PE=1 SV=1	100	0.642	1.2157e-16	0.993002			141587	398104	316829	255503	55871.3	212352			111448	219149	185329	178724	55871.3	135649
Medium	0.029	F1Q632	HECT-type E3 ubiquitin transferase OS=Danio rerio OX=7955 GN=nedd4l PE=1 SV=1	100	0.933	1.2157e-16	0.893231			239094	833970	325671	383166	223059	327373			188200	459085	190502	268023	223059	209123
Medium	0.032	F1Q9D6	Retinoblastoma 1 OS=Danio rerio OX=7955 GN=rb1 PE=1 SV=1	100	0.768	1.2157e-16	0.960447				51679.7	42320.6	32330.5		39900.6				28448.7	24755.5	22615		25488.2
Medium	0.036	F1QGG3	Vesicle-fusing ATPase OS=Danio rerio OX=7955 GN=nsfb PE=1 SV=1	100	0.476	1.2157e-16	0.960447			79446.2	123561	297035	108174	29897	141499			62535	68018.3	173751	75667	29897	90388.3
Medium	0.039	Q5RG82	Influenza virus NS1A-binding protein homolog A OS=Danio rerio OX=7955 GN=ivns1abpa PE=2 SV=1	100	0.404	1.2157e-16	0.857614				215978	15348.6	25344.1		21341.3				118892	8978.17	17728.1		13632.6
Medium	0.039	Q6IQ97	RNA-binding protein 4.1 OS=Danio rerio OX=7955 GN=rbm4.1 PE=1 SV=1	100	0.586	1.2157e-16	0.993002			44713.4	85955.4	139811	50364.5	41861.7	79639.2			35195.5	47316.9	81782.5	35229.8	41861.7	50872.9
Medium	0.042	F1QF45	Carbonyl reductase family member 4 OS=Danio rerio OX=7955 GN=cbr4 PE=1 SV=1	100	0.467	1.2157e-16	0.960447			246843	378778	609818	275346	115182	280647			194299	208510	356714	192603	115182	179275
Medium	0.043	F1QFI0	Si:ch73-256j6.4 (Fragment) OS=Danio rerio OX=7955 GN=si:ch73-256j6.4 PE=4 SV=1	100	0.786	1.2157e-16	0.960447				133215	217613	165168	7662.61	177116				73332.6	127293	115534	7662.61	113140
Medium	0.043	A2CG95	Medium-chain specific acyl-CoA dehydrogenase, mitochondrial OS=Danio rerio OX=7955 GN=acadm PE=1 SV=1	100	0.558	1.2157e-16	0.976887			37751.8	97880.4	149560	67476.9		33807.8			29715.8	53881.4	87485.2	47199.8		21596.2
Medium	0.044	E7EY20	Integrin-linked kinase-associated serine/threonine phosphatase OS=Danio rerio OX=7955 GN=ilkap PE=3 SV=1	100	0.79	1.2157e-16	0.960447			192731	282041	427198	242650	152222	232576			151705	155258	249890	169733	152222	148568
High	0	K7DXZ3	Striatin-interacting protein 1 homolog OS=Danio rerio OX=7955 GN=strip1 PE=1 SV=1	77.254	0.346	1.2157e-16	0.461015	29479.2	12885.1	3.59003e+07	2.36496e+07	1.00922e+07	9.81017e+06	8.98647e+06	4.50057e+06	22036.2	9070.96	2.82584e+07	1.30187e+07	5903431	6.86217e+06	8.98647e+06	2.87493e+06
High	0	F1R1W1	Striatin, calmodulin-binding protein 3 OS=Danio rerio OX=7955 GN=strn3 PE=1 SV=1	27.748	7.824	1.2157e-16	3.4667e-16	17511.3	10237.9	16135.1	62393.2	47485	1.63256e+06	222385	973913	13090	7207.39	12700.5	34346.3	27776.4	1.14197e+06	222385	622128
Medium	0.027	F1QP23	Glutamyl-tRNA synthetase OS=Danio rerio OX=7955 GN=eprs1 PE=1 SV=1	23.9	0.838	1.2157e-16	0.960447	12820.2		163008	330439	721935	333118	136608	306399	9583.29		128309	181901	422297	233015	136608	195726
High	0	A0A2R8RT71	CTTNBP2 N-terminal-like b OS=Danio rerio OX=7955 GN=cttnbp2nlb PE=1 SV=1	14.103	3.698	2.7014e-13	4.3467e-08		17757.4	60726.1	86436.4		747001	246467	516072		12501	47799.7	47581.6		522524	246467	329663
High	0	F1QV15	Phosvitin (Fragment) OS=Danio rerio OX=7955 GN=vtg6 PE=1 SV=1	9.109	0.433	3.3908e-09	0.960447	9767.68		106799	468490	555276	228072		75209.3	7301.51		84065.4	257895	324809	159536		48043.2
Medium	0.021	E7F8T6	Nicotinamide phosphoribosyltransferase OS=Danio rerio OX=7955 GN=nampt1 PE=1 SV=1	7.732	0.522	7.4552e-08	0.960447	32888.9			162862	547066	269853	89966.1	254287	24585			89652.6	320007	188761	89966.1	162437
High	0	F1Q7L0	Phosvitin (Fragment) OS=Danio rerio OX=7955 GN=vtg4 PE=1 SV=1	6.511	0.33	1.4413e-06	0.37443	191341	74415.9	2.3908e+06	6628623	7.38127e+06	2.70509e+06	406002	2.22077e+06	143031	52388	1.88189e+06	3.64894e+06	4.31768e+06	1.8922e+06	406002	1.41861e+06
High	0	F1R2S5	Phosvitin (Fragment) OS=Danio rerio OX=7955 GN=vtg5 PE=1 SV=1	6.096	0.321	4.1634e-06	0.327263	88839.8	30461.7	633754	2.16498e+06	2.14106e+06	846181	123602	556888	66409.3	21444.7	498851	1.19178e+06	1.25241e+06	591900	123602	355736
Medium	0.015	A0A0R4ISE8	Im:6912630 OS=Danio rerio OX=7955 GN=im:6912630 PE=3 SV=1	5.575	2.952	1.632e-05	3.6751e-06	28560		32498.1	74178.6	65555.6	159013	159209	218960	21349.1		25580.4	40834	38346.8	111229	159209	139870
Medium	0.038	A8WGB1	Collagen and calcium-binding EGF domain-containing protein 1 OS=Danio rerio OX=7955 GN=ccbe1 PE=1 SV=2	5.138	0.975	5.4081e-05	0.847981	19964.4	429976	214455	581578	1.83702e+06	1.08404e+06	209033	1.04617e+06	14923.7	302699	168805	320148	1.07457e+06	758279	209033	668285
High	0	Q6P6X9	Nucleoporin NUP35 OS=Danio rerio OX=7955 GN=nup35 PE=1 SV=1	4.713	0.838	0.00017994	0.960447		28073.9	110406	330250	150160	191600	92495.5	132325		19763.7	86904.2	181797	87836.2	134023	92495.5	84528.3
High	0	F1QHT9	RNA helicase OS=Danio rerio OX=7955 GN=ddx19 PE=1 SV=1	3.022	0.669	0.0269038	0.992008	698768	706109	589344	945808	2.35601e+06	626141	542201	928090	522341	497093	463894	520650	1.37815e+06	437983	542201	592857
Medium	0.021	Q6DRC4	Eukaryotic translation initiation factor 3 subunit G OS=Danio rerio OX=7955 GN=eif3g PE=1 SV=1	2.931	1.132	0.0353464	0.453011	102721	25126.8	12760.2	131536	208146	167843		132084	76785.9	17689	10044	72408.2	121755	117405		84374.3

## Sheet: 8 ptns enriched in WT to mut
Protein FDR Confidence: Combined	Exp. q-value: Combined	Accession	Description	Abundance Ratio: (WT) / (CTRL)	Abundance Ratio: (WT) / (MUT)	Abundance Ratio Adj. P-Value: (WT) / (CTRL)	Abundance Ratio Adj. P-Value: (WT) / (MUT)	Abundances (Normalized): F1: Sample, CTRL, 1	Abundances (Normalized): F2: Sample, CTRL, 2	Abundances (Normalized): F3: Sample, MUT, 3	Abundances (Normalized): F4: Sample, MUT, 4	Abundances (Normalized): F5: Sample, MUT, 5	Abundances (Normalized): F6: Sample, WT, 6	Abundances (Normalized): F7: Sample, WT, 7	Abundances (Normalized): F8: Sample, WT, 8	Abundance: F1: Sample, CTRL, 1	Abundance: F2: Sample, CTRL, 2	Abundance: F3: Sample, MUT, 3	Abundance: F4: Sample, MUT, 4	Abundance: F5: Sample, MUT, 5	Abundance: F6: Sample, WT, 6	Abundance: F7: Sample, WT, 7	Abundance: F8: Sample, WT, 8
High	0	A0A2R8QGU6	Striatin, calmodulin-binding protein 4 OS=Danio rerio OX=7955 GN=strn4 PE=1 SV=1	100	100	1.21569e-16	3.46667e-16						166267	119676	60095.3						116303	119676	38388.4
High	0.007	F1RCN0	DNA (cytosine-5)-methyltransferase OS=Danio rerio OX=7955 GN=dnmt1 PE=1 SV=1	0.537	100	0.11445	3.46667e-16	76506.9	62305					15488.5	88800.8	57190.3	43862					15488.5	56725.3
Medium	0.026	F1QFV1	Cortactin-binding protein 2 OS=Danio rerio OX=7955 GN=cttnbp2 PE=4 SV=1	100	100	1.21569e-16	3.46667e-16						133800	17125.9	125775						93592.9	17125.9	80344.2
Medium	0.029	A0A1D5NSS6	Si:ch73-335l21.2 OS=Danio rerio OX=7955 GN=si:ch73-335l21.2 PE=4 SV=1	1.095	100	0.984174	3.46667e-16	107587	115652				149848	81903.3	122108	80422.9	81417.7				104818	81903.3	78001.6
High	0	F1R1W1	Striatin, calmodulin-binding protein 3 OS=Danio rerio OX=7955 GN=strn3 PE=1 SV=1	27.748	7.824	1.21569e-16	3.46667e-16	17511.3	10237.9	16135.1	62393.2	47485	1.63256e+06	222385	973913	13090	7207.39	12700.5	34346.3	27776.4	1.14197e+06	222385	622128
High	0	A0A2R8RT71	CTTNBP2 N-terminal-like b OS=Danio rerio OX=7955 GN=cttnbp2nlb PE=1 SV=1	14.103	3.698	2.7014e-13	4.34669e-08		17757.4	60726.1	86436.4		747001	246467	516072		12501	47799.7	47581.6		522524	246467	329663
Medium	0.015	A0A0R4ISE8	Im:6912630 OS=Danio rerio OX=7955 GN=im:6912630 PE=3 SV=1	5.575	2.952	1.63197e-05	3.67509e-06	28560		32498.1	74178.6	65555.6	159013	159209	218960	21349.1		25580.4	40834	38346.8	111229	159209	139870
Medium	0.022	E7FGC2	Structural maintenance of chromosomes protein OS=Danio rerio OX=7955 GN=smc4 PE=1 SV=2	100	2.092	1.21569e-16	0.000964438			40554.9	65628.6	96061.6	80156.1		212782			31922.2	36127.3	56191.3	56068.9		135924

## Sheet: all
Protein FDR Confidence: Combined	Exp. q-value: Combined	Accession	Description	Abundance Ratio: (WT) / (CTRL)	Abundance Ratio: (WT) / (MUT)	Abundance Ratio Adj. P-Value: (WT) / (CTRL)	Abundance Ratio Adj. P-Value: (WT) / (MUT)	Abundances (Normalized): F1: Sample, CTRL, 1	Abundances (Normalized): F2: Sample, CTRL, 2	Abundances (Normalized): F3: Sample, MUT, 3	Abundances (Normalized): F4: Sample, MUT, 4	Abundances (Normalized): F5: Sample, MUT, 5	Abundances (Normalized): F6: Sample, WT, 6	Abundances (Normalized): F7: Sample, WT, 7	Abundances (Normalized): F8: Sample, WT, 8	Abundance: F1: Sample, CTRL, 1	Abundance: F2: Sample, CTRL, 2	Abundance: F3: Sample, MUT, 3	Abundance: F4: Sample, MUT, 4	Abundance: F5: Sample, MUT, 5	Abundance: F6: Sample, WT, 6	Abundance: F7: Sample, WT, 7	Abundance: F8: Sample, WT, 8
High	0	A0A2R8QGU6	Striatin, calmodulin-binding protein 4 OS=Danio rerio OX=7955 GN=strn4 PE=1 SV=1	100	100	1.21569e-16	3.46667e-16						166267	119676	60095.3						116303	119676	38388.4
Medium	0.026	F1QFV1	Cortactin-binding protein 2 OS=Danio rerio OX=7955 GN=cttnbp2 PE=4 SV=1	100	100	1.21569e-16	3.46667e-16						133800	17125.9	125775						93592.9	17125.9	80344.2
High	0	F1R1W1	Striatin, calmodulin-binding protein 3 OS=Danio rerio OX=7955 GN=strn3 PE=1 SV=1	27.748	7.824	1.21569e-16	3.46667e-16	17511.3	10237.9	16135.1	62393.2	47485	1.63256e+06	222385	973913	13090	7207.39	12700.5	34346.3	27776.4	1.14197e+06	222385	622128
High	0	E7EYW5	Cystatin 14a, tandem duplicate 1 OS=Danio rerio OX=7955 GN=cst14a.1 PE=1 SV=1	0.01	0.01	1.21569e-16	3.46667e-16	195115	41733.2	99287.3	149481	431976				145852	29379.7	78152.6	82286.3	252685
High	0	Q90WA5	Protein disulfide-isomerase A6 OS=Danio rerio OX=7955 GN=pdia6 PE=1 SV=1	0.01	0.01	1.21569e-16	3.46667e-16	261936	363685	19771.9	31033.8	26754.4				195802	256030	15563.1	17083.6	15650
High	0	Q6NZV2	DNA helicase OS=Danio rerio OX=7955 GN=mcm4 PE=1 SV=1	0.01	0.01	1.21569e-16	3.46667e-16	15936.7		58038	40063	113092				11912.9		45683.8	22053.9	66153.6
Medium	0.021	F1QPA7	Alanyl-tRNA-editing protein Aarsd1 OS=Danio rerio OX=7955 GN=aarsd1 PE=1 SV=1	0.01	0.01	1.21569e-16	3.46667e-16	57835.5	57133.2			227120				43233	40221.1			132854
Medium	0.021	F1Q5X0	Synaptosome-associated protein 29 OS=Danio rerio OX=7955 GN=snap29 PE=1 SV=1	0.01	0.01	1.21569e-16	3.46667e-16		12634	178915	260210	334336					8894.19	140830	143241	195570
Medium	0.042	C00009	K1C10_HUMAN	0.01	0.01	1.21569e-16	3.46667e-16	49921.1	50960.2	79219.1	41944.8	95865.3				37316.8	35875.5	62356.2	23089.9	56076.5
High	0.007	F1RCN0	DNA (cytosine-5)-methyltransferase OS=Danio rerio OX=7955 GN=dnmt1 PE=1 SV=1	0.537	100	0.11445	3.46667e-16	76506.9	62305					15488.5	88800.8	57190.3	43862					15488.5	56725.3
Medium	0.029	A0A1D5NSS6	Si:ch73-335l21.2 OS=Danio rerio OX=7955 GN=si:ch73-335l21.2 PE=4 SV=1	1.095	100	0.984174	3.46667e-16	107587	115652				149848	81903.3	122108	80422.9	81417.7				104818	81903.3	78001.6
High	0	Q1LWX6	FabG (Beta-ketoacyl-[acyl-carrier-protein] reductase, E. coli) like OS=Danio rerio OX=7955 GN=hsd17b8 PE=1 SV=1		0.01		3.46667e-16					174133								101859
High	0	F8W445	Doublecortin-like kinase 2b (Fragment) OS=Danio rerio OX=7955 GN=dclk2b PE=4 SV=1		0.01		3.46667e-16			113293	285995	105644						89176.8	157435	61796.4
High	0.007	Q6PC14	60S ribosomal protein L23 OS=Danio rerio OX=7955 GN=rpl23 PE=2 SV=1		0.01		3.46667e-16				177906								97933.8
High	0.01	X1WE18	KN motif and ankyrin repeat domain-containing protein 2 OS=Danio rerio OX=7955 GN=kank2 PE=3 SV=1		0.01		3.46667e-16			34441.9	107580							27110.5	59221
Medium	0.016	A0A0R4IW96	Peptidylprolyl isomerase OS=Danio rerio OX=7955 GN=aip PE=1 SV=1		0.01		3.46667e-16			38203.2	182301	42445.9						30071.1	100353	24828.8
High	0	A0A2R8RT71	CTTNBP2 N-terminal-like b OS=Danio rerio OX=7955 GN=cttnbp2nlb PE=1 SV=1	14.103	3.698	2.7014e-13	4.34669e-08		17757.4	60726.1	86436.4		747001	246467	516072		12501	47799.7	47581.6		522524	246467	329663
Medium	0.015	A0A0R4ISE8	Im:6912630 OS=Danio rerio OX=7955 GN=im:6912630 PE=3 SV=1	5.575	2.952	1.63197e-05	3.67509e-06	28560		32498.1	74178.6	65555.6	159013	159209	218960	21349.1		25580.4	40834	38346.8	111229	159209	139870
Medium	0.029	Q568V3	F-box only protein 50 OS=Danio rerio OX=7955 GN=nccrp1 PE=2 SV=2	0.195	0.159	5.07357e-07	9.50706e-05	74211.5	195381	172249	176527	122902	114728	4793.87		55474.4	137546	135584	97174.7	71891.6	80251.7	4793.87
High	0.01	Q9YH61	[Tau protein] kinase OS=Danio rerio OX=7955 GN=gsk3ab PE=1 SV=1	0.519	0.176	0.0949497	0.000458057	42419.1	63079.2			152208			26821.2	31709	44407.1			89034.4			17133.2
Medium	0.022	E7FGC2	Structural maintenance of chromosomes protein OS=Danio rerio OX=7955 GN=smc4 PE=1 SV=2	100	2.092	1.21569e-16	0.000964438			40554.9	65628.6	96061.6	80156.1		212782			31922.2	36127.3	56191.3	56068.9		135924
Medium	0.014	A0A2R8QNS5	Uncharacterized protein OS=Danio rerio OX=7955 GN=psmg4 PE=1 SV=1	2.507	1.893	0.114833	0.00371995	24167.4		23626.7	22007	90780.1	85074.3		43153.6	18065.6		18597.4	12114.4	53101.9	59509.1		27566.2
High	0.01	F1Q8U2	Ubiquilin 4 OS=Danio rerio OX=7955 GN=ubqln4 PE=1 SV=1	100	0.223	1.21569e-16	0.0106961			247963	376092	163685	108356		28238.6			195180	207032	95747.8	75794.5		18038.6
High	0	F1R9D2	Premelanosome protein a OS=Danio rerio OX=7955 GN=pmela PE=4 SV=1	100	0.226	1.21569e-16	0.0119394			51782.1	147184	865626	120137	58713.5	40623.5			40759.6	81022	506349	84035.2	58713.5	25950
High	0	Q5RKM3	Stress-induced phosphoprotein 1 OS=Danio rerio OX=7955 GN=stip1 PE=1 SV=1	0.659	0.23	0.34156	0.0148214	290868	243885	1.1567e+06	1.59918e+06	1.66217e+06	324593	202473	411873	217429	171693	910477	880319	972286	227052	202473	263101
Medium	0.026	F1R6R1	Apoptotic chromatin condensation inducer 1a (Fragment) OS=Danio rerio OX=7955 GN=acin1a PE=1 SV=2	1.247	1.647	0.984174	0.0194898	185479		140435	22549	395174	231235	90732	245763	138648		110541	12412.8	231158	161748	90732	156992
High	0.001	A0A2R8QHP5	Abasic site processing protein HMCES OS=Danio rerio OX=7955 GN=hmces PE=1 SV=1	100	1.601	1.21569e-16	0.0265083			49277	250900	262580	401580	53251.4	433668			38787.7	138116	153597	280904	53251.4	277024
High	0	A0A0N4SU88	PCNA-associated factor OS=Danio rerio OX=7955 GN=pclaf PE=1 SV=1	2.529	1.525	0.110049	0.0434658	92650.8	60028.5	75963.8	123651	191791	173823		204694	69258.1	42259.5	59793.9	68067.6	112188	121588		130757
High	0	F1QM43	Guanosine-3',5'-bis(diphosphate) 3'-pyrophosphohydrolase MESH1 OS=Danio rerio OX=7955 GN=hddc3 PE=1 SV=1	1.412	0.254	0.924756	0.0434658	63447.8	56187.7	165531	810515		126983	68259.5	84331.5	47428.3	39555.6	130295	446174		88824.4	68259.5	53870.4
High	0	F1R2T3	Phosvitin OS=Danio rerio OX=7955 GN=vtg7 PE=1 SV=1	100	0.256	1.21569e-16	0.0456992			64642.6	125059	346729	54505.5	7904.62	88918.4			50882.5	68842.9	202820	38126.4	7904.62	56800.5
High	0	A8KC22	Heterogeneous nuclear ribonucleoprotein L2 OS=Danio rerio OX=7955 GN=hnrnpl2 PE=1 SV=1	1.245	1.48	0.984174	0.0576551	79887.3	59978.4	27352.6	58237.1	140429	78082.8		95087	59717.1	42224.2	21530.2	32058.5	82144.1	54618.6		60740.9
High	0.01	Q3B732	High mobility group nucleosomal-binding domain 2 OS=Danio rerio OX=7955 GN=hmgn2 PE=1 SV=1	100	0.264	1.21569e-16	0.0603331			465953	1.33603e+06	977554	198818	123155	359419			366769	735459	571821	139073	123155	229594
High	0	Q7SYD0	Carbonyl reductase 1 OS=Danio rerio OX=7955 GN=cbr1 PE=1 SV=1	0.376	0.27	0.00459665	0.0728346	839478	739816	619216	567813	2.10116e+06	459016	154088	436935	627525	520822	487407	312571	1.22908e+06	321080	154088	279111
High	0.003	Q5RH85	Activating transcription factor 6 OS=Danio rerio OX=7955 GN=atf6 PE=4 SV=2	100	1.424	1.21569e-16	0.080079			330253	1.03811e+06	1.22869e+06	1.54022e+06		1.41955e+06			259954	571460	718724	1.07738e+06		906799
Medium	0.026	B8JJ32	Sidoreflexin OS=Danio rerio OX=7955 GN=sfxn3 PE=1 SV=1	0.528	0.283	0.103209	0.113795	64248.3	48008.4	60801.7	80631.6	220734	29307	14977.9	62421.3	48026.7	33797.4	47859.2	44386.2	129119	20500.1	14977.9	39874.3
High	0	F1R2L8	ATP-dependent RNA helicase DDX1 OS=Danio rerio OX=7955 GN=ddx1 PE=1 SV=1	1.114	0.299	0.990512	0.192498	62082.1	32908.7			168438		29147.8	86989.7	46407.4	23167.4			98527.9		29147.8	55568.4
High	0	E7F8J2	Si:dkey-108k21.10 OS=Danio rerio OX=7955 GN=si:dkey-108k21.10 PE=3 SV=1	0.609	0.306	0.228334	0.234884	2.49809e+06	1.92968e+06	2.7001e+06	5.05564e+06	2.60094e+06	1.49556e+06	753932	1.5474e+06	1.86737e+06	1.35847e+06	2.12534e+06	2783038	1.52142e+06	1.04614e+06	753932	988469
High	0	A0A2R8Q860	Heat shock cognate 71 kDa protein OS=Danio rerio OX=7955 GN=hspa8 PE=1 SV=1	0.654	0.315	0.330136	0.29964	5.57983e+06	3.17479e+06	5.69253e+06	1.50301e+07	8.49358e+06	4.39191e+06	591067	3.55817e+06	4.17102e+06	2.23502e+06	4.4808e+06	8.27378e+06	4.96833e+06	3.07213e+06	591067	2.27293e+06
High	0	A4VAK4	Heat shock 27 kDa protein OS=Danio rerio OX=7955 GN=hspb1 PE=1 SV=1	0.68	0.319	0.37772	0.326841	1.12723e+06	595708	639673	1.9484e+06	1.32137e+06	449495	51238.5	839923	842623	419372	503510	1.07256e+06	772936	314420	51238.5	536537
High	0	F1R2S5	Phosvitin (Fragment) OS=Danio rerio OX=7955 GN=vtg5 PE=1 SV=1	6.096	0.321	4.16338e-06	0.327263	88839.8	30461.7	633754	2.16498e+06	2.14106e+06	846181	123602	556888	66409.3	21444.7	498851	1.19178e+06	1.25241e+06	591900	123602	355736
Medium	0.015	Q6NZS4	RNA-splicing ligase RtcB homolog OS=Danio rerio OX=7955 GN=rtcb PE=2 SV=1	1.455	1.211	0.912058	0.327263	124681	79134.3	73197.2	119332	321436	135412		154175	93200.9	55709.7	57616.1	65690.1	188024	94719.8		98485.7
Medium	0.039	Q1LWH1	Ribosomal protein S16 OS=Danio rerio OX=7955 GN=rps16 PE=1 SV=1	2.552	1.193	0.104397	0.35754	44557.7	17260.1	44564.1	70702	78895	118120		42393	33307.6	12150.9	35078	38920.1	46149.7	82624.8		27080.3
High	0.01	Q6PHF1	Calcium-regulated heat stable protein 1 OS=Danio rerio OX=7955 GN=carhsp1 PE=1 SV=1	1.497	0.327	0.890632	0.365663	186796	158102	345948	964076	434718	287746	113169	271743	139634	111302	272308	530706	254289	201277	113169	173587
Medium	0.033	E7FFC4	Apoptosis-inducing factor mitochondria-associated 2 OS=Danio rerio OX=7955 GN=aifm2 PE=1 SV=1	0.577	0.329	0.178373	0.372263	73142.2		37711.6	274934	128354	42181.4	12391.5	54226.6	54675.1		29684.2	151346	75081	29505.7	12391.5	34639.5
High	0	F1Q7L0	Phosvitin (Fragment) OS=Danio rerio OX=7955 GN=vtg4 PE=1 SV=1	6.511	0.33	1.44125e-06	0.37443	191341	74415.9	2.3908e+06	6.62862e+06	7.38127e+06	2.70509e+06	406002	2.22077e+06	143031	52388	1.88189e+06	3.64894e+06	4.31768e+06	1.8922e+06	406002	1.41861e+06
High	0	C00023	K2C1_HUMAN	0.366	0.33	0.00355472	0.37443	535162	2.46375e+06	1.10868e+06	1.97967e+06	2.54095e+06	340502	309772	935370	400043	1.73446e+06	872683	1.08977e+06	1.48633e+06	238180	309772	597507
High	0	A0A286YBN1	Proline-rich coiled-coil 2C OS=Danio rerio OX=7955 GN=prrc2c PE=1 SV=2	1.042	1.171	0.968679	0.380274	214877	143470	91642.4	144082	185175	120510	26411.4	303553	160624	101001	72135	79314.5	108318	84296.4	26411.4	193908
High	0.007	E7F569	Si:ch211-153b23.5 OS=Danio rerio OX=7955 GN=si:ch211-153b23.5 PE=1 SV=1	0.608	0.333	0.226895	0.382788	140804		237751	250819	407785	135965	5246.36	85578.8	105253		187143	138071	238534	95107.1	5246.36	54667.1
High	0	Q6NUY0	Adenylate kinase 4, mitochondrial OS=Danio rerio OX=7955 GN=ak4 PE=1 SV=1	0.927	0.333	0.912058	0.382788	80420.5	31217.5	89308.8	140545	152128	44016.7	46838.9	48990.5	60115.7	21976.8	70298.2	77367.4	88987.2	30789.5	46838.9	31294.8
High	0.009	A4QN90	Zgc:163061 OS=Danio rerio OX=7955 GN=zgc:163061 PE=1 SV=1	0.565	0.334	0.161746	0.385893	656213	675708	767271	1.18659e+06	752629	376493	163463	396874	490531	475691	603947	653195	440251	263355	163463	253520
Medium	0.049	Q6DHT4	Aldehyde dehydrogenase 6 family, member A1 OS=Danio rerio OX=7955 GN=aldh6a1 PE=1 SV=1	1.285	1.149	0.968679	0.413485	45062.8	33040.1	43141.6	41823.4	139113	49617.5		49557.8	33685.2	23259.9	33958.3	23023	81374.4	34707.3		31657.1
High	0	Q5BKW9	Isoaspartyl peptidase/L-asparaginase OS=Danio rerio OX=7955 GN=asrgl1 PE=2 SV=1	0.595	0.341	0.204421	0.434681	342047			470465	759077		150043	276313	255686			258982	444023		150043	176507
Medium	0.021	Q6DRC4	Eukaryotic translation initiation factor 3 subunit G OS=Danio rerio OX=7955 GN=eif3g PE=1 SV=1	2.931	1.132	0.0353464	0.453011	102721	25126.8	12760.2	131536	208146	167843		132084	76785.9	17689	10044	72408.2	121755	117405		84374.3
High	0	W8GN23	Enhanced green fluorescent protein OS=Mycobacterium tuberculosis (strain ATCC 25618 / H37Rv) GN=eGFP PE=4 SV=1	0.014	0.344	1.21569e-16	0.454253	2.37617e+07	8.79106e+06	919883	806549	248006	333845	210671	67358.9	1.77623e+07	6.18881e+06	724073	443991	145072	233523	210671	43028.4
High	0	K7DXZ3	Striatin-interacting protein 1 homolog OS=Danio rerio OX=7955 GN=strip1 PE=1 SV=1	77.254	0.346	1.21569e-16	0.461015	29479.2	12885.1	3.59003e+07	2.36496e+07	1.00922e+07	9.81017e+06	8.98647e+06	4.50057e+06	22036.2	9070.96	2.82584e+07	1.30187e+07	5.90343e+06	6.86217e+06	8.98647e+06	2.87493e+06
High	0.009	F1Q4W7	Histone-lysine N-methyltransferase, H3 lysine-79 specific OS=Danio rerio OX=7955 GN=dot1l PE=1 SV=2	1.352	1.12	0.968679	0.461015	35352.7	25150.3	33108.1	105254	21316	46445.9	37090.8	34970	26426.7	17705.5	26060.6	57940.5	12468.8	32488.7	37090.8	22338.6
High	0	A0A0G2KLD8	Biphenyl hydrolase like OS=Danio rerio OX=7955 GN=bphl PE=1 SV=1	1.021	0.347	0.968679	0.461015	684729	285734	2.44298e+06	2.1658e+06	3.49876e+06	1.05668e+06	242317	1.68087e+06	511847	201154	1.92296e+06	1.19223e+06	2.0466e+06	739141	242317	1.07373e+06
Medium	0.012	A0A0B4J1A6	IGF-II mRNA-binding protein 1 OS=Danio rerio OX=7955 GN=igf2bp1 PE=1 SV=1	100	0.352	1.21569e-16	0.500151			58107	189046	215168	128598	12071.8				45738.1	104066	125863	89953.7	12071.8
High	0	Q567N5	60S ribosomal protein L6 OS=Danio rerio OX=7955 GN=rpl6 PE=1 SV=1	2.084	1.104	0.318679	0.500151	180209	96774.9	120755	272480	328593	330414		229284	134709	68128.5	95050.2	149995	192211	231123		146465
Medium	0.039	A0A286Y813	Dual-specificity mitogen-activated protein kinase kinase 6 OS=Danio rerio OX=7955 GN=map2k6 PE=1 SV=1	1.489	1.104	0.890632	0.500151	53080.4		25844.4	71598.1	159242	76417.1		81753.8	39678.5		20343	39413.4	93149.1	53453.5		52223.7
Medium	0.031	A0A2R8RR95	Arpin OS=Danio rerio OX=7955 GN=arpin PE=3 SV=1	1.18	0.353	0.991219	0.500337	29443.6		30639.6	179338	98444.6	34757.7	10323.7	71658	22009.6		24117.5	98722.1	57585.3	24312.9	10323.7	45774.6
High	0.01	F1R500	Cold shock domain-containing C2, RNA-binding a OS=Danio rerio OX=7955 GN=csdc2a PE=4 SV=1	2.759	1.097	0.0604279	0.503631	61994.2	13403.6	11972.1	88032.7	113276	109566		57739.5	46341.8	9436.01	9423.69	48460.4	66261.2	76641.2		36883.6
High	0.009	A0A2R8Q5U6	Ubiquinol-cytochrome c reductase core protein 1 OS=Danio rerio OX=7955 GN=uqcrc1 PE=1 SV=1	0.788	0.36	0.646388	0.561477	451461	390834		499362	1.02479e+06	331136	127084	411915	337475	275143		274889	599453	231628	127084	263128
High	0	C00011	K1C9_HUMAN	0.229	1.068	7.17238e-06	0.58648	4673.98	430349	260868	1.47778e+06	608774	306785	67207.3	494763	3493.88	302961	205339	813491	356103	214595	67207.3	316051
High	0	A0A140LH24	Si:dkey-23a13.17 OS=Danio rerio OX=7955 GN=si:dkey-23a13.17 PE=3 SV=1	0.4	0.365	0.00899342	0.592968	8.19487e+06	7.39831e+06	8.9946e+06	8.92119e+06	5.55944e+06	2.83871e+06	2.25876e+06	3.36819e+06	6.12581e+06	5.20833e+06	7.07997e+06	4.91095e+06	3.252e+06	1.98567e+06	2.25876e+06	2.15158e+06
High	0.001	E7FEZ9	Antioxidant 1 copper chaperone OS=Danio rerio OX=7955 GN=atox1 PE=1 SV=1	2.079	0.369	0.320088	0.628314		17518.1	51206.4	457435	48970.2	150912	18046.5	36412.4		12332.6	40306.4	251809	28645.2	105562	18046.5	23260
High	0	F1RAM4	Zgc:110339 OS=Danio rerio OX=7955 GN=zgc:110339 PE=1 SV=1	0.336	0.371	0.00133617	0.63451	1.88899e+06	1.86659e+06	449721	913206	2.50359e+06	481063	152730	652478	1.41205e+06	1.31406e+06	353991	502703	1.46448e+06	336501	152730	416798
High	0	F8W2P6	Glycerate kinase OS=Danio rerio OX=7955 GN=glyctk PE=1 SV=1	0.523	0.371	0.0998269	0.63451	79311.1	62663.7	39566.7	99425.7	228611	36865.7	19685.1	63929.5	59286.4	44114.6	31144.4	54732	133726	25787.4	19685.1	40837.7
High	0	Q6DC04	Histone-arginine methyltransferase CARM1 OS=Danio rerio OX=7955 GN=carm1 PE=2 SV=1	1.327	1.044	0.968679	0.640675	505502	540494	298187	611880	687907	718012	157338	716736	377871	380502	234714	336829	402392	502247	157338	457846
Medium	0.042	A0A2R8QR17	Plectin b OS=Danio rerio OX=7955 GN=plecb PE=1 SV=1	2.316	0.374	0.186924	0.65094	57725.7	11785.6	267733	164003	146881	109667	33280.2	61276	43150.9	8296.97	210742	90280.5	85918.5	76711.4	33280.2	39142.7
Medium	0.015	E7F675	Zmp:0000000662 OS=Danio rerio OX=7955 GN=zmp:0000000662 PE=4 SV=1	1.4	1.038	0.930883	0.651414	659856	322922	415190	1.30359e+06	772533	968652	430867	869048	493254	227334	326811	717603	451894	677568	430867	555141
High	0	A4IGC8	Delta-1-pyrroline-5-carboxylate synthase OS=Danio rerio OX=7955 GN=aldh18a1 PE=1 SV=1	1.27	0.376	0.97033	0.660768	456675	311068	469559	1.02805e+06	1.40359e+06	577597	138870	590755	341373	218989	369607	565923	821029	404027	138870	377370
High	0	X1WGM1	Histone H4 (Fragment) OS=Danio rerio OX=7955 GN=zgc:163040 PE=3 SV=1	1.143	1.031	0.991219	0.664473	390860	285602	243914	396705	526625	297610	400746	445958	292175	201061	191993	218379	308050	208177	400746	284875
Medium	0.021	F1QEN2	Pantothenate kinase 1b OS=Danio rerio OX=7955 GN=pank1b PE=1 SV=1	1.355	0.38	0.968679	0.699484	69416.2	49644.5	212338	160327	209276	79521.4	38246.8	119252	51889.8	34949.2	167139	88256.9	122416	55624.9	38246.8	76177
Medium	0.024	F1QG80	Ribosomal protein L22 OS=Danio rerio OX=7955 GN=rpl22 PE=1 SV=1	1.306	1.016	0.968679	0.720992	182825	89531.8	159226	179034	180019	313348	74362.9	181936	136665	63029.5	125333	98554.9	105302	219186	74362.9	116219
Medium	0.031	F1Q553	Nuclear factor of-activated T cells 2-interacting protein OS=Danio rerio OX=7955 GN=nfatc2ip PE=4 SV=1	0.702	0.386	0.436392	0.753295	83277.7	124637	101168	205772	224757	59067.3	74110	86702.4	62251.5	87743.2	79633.2	113274	131472	41317.3	74110	55384.9
Medium	0.024	A2CEX6	Protein HIRA OS=Danio rerio OX=7955 GN=hira PE=1 SV=1	1.33	1.006	0.968679	0.753295	74025.1	52960.9	48448.4	92109.2	116926	92706.8	54988.8	104493	55335	37283.9	38135.5	50704.4	68396.2	64848	54988.8	66749.1
High	0	Q6NZZ9	Pre-mRNA-splicing factor RBM22 OS=Danio rerio OX=7955 GN=rbm22 PE=2 SV=1	0.32	0.997	0.000753676	0.772259	519607	432051	152319	360323	462417	405081	8752.81	414753	388415	304159	119896	198351	270492	283353	8752.81	264941
High	0	A9JRS6	Keratin 4 OS=Danio rerio OX=7955 GN=krt4 PE=1 SV=1	0.414	0.389	0.0126531	0.772259	1.44656e+06	1.58051e+06	6.06469e+06	923994	1.45263e+06	556536	195094	235119	1.08133e+06	1.11266e+06	4.77373e+06	508642	849715	389295	195094	150193
High	0	Q7ZVP2	RAB5C, member RAS oncogene family OS=Danio rerio OX=7955 GN=rab5c PE=1 SV=1	1.39	0.39	0.933049	0.772259	75752.4	39518.5	132555	120279	281706	109797	20379.5	100942	56626.2	27820.6	104339	66211.6	164784	76802.7	20379.5	64480.8
High	0.002	Q6NYU8	Heterogeneous nuclear ribonucleoprotein A/B OS=Danio rerio OX=7955 GN=hnrnpaba PE=1 SV=1	1.259	0.996	0.978513	0.772259	149789	68493.4	68399.3	158750	222558	221726	57946.4	160300	111970	48218.6	53839.5	87389	130185	155096	57946.4	102398
High	0.007	B0S6J8	Ankyrin repeat domain 10b OS=Danio rerio OX=7955 GN=ankrd10b PE=4 SV=1	100	0.393	1.21569e-16	0.787093			210813	336181	137667	131978	61867.3	73834.4			165938	185061	80528.7	92318.2	61867.3	47164.9
High	0	Q1LW00	Metalloendopeptidase OS=Danio rerio OX=7955 GN=he1.1 PE=1 SV=1	0.982	0.981	0.954849	0.821989	857984	431795	196428	496155	1.49233e+06	752753	193626	859554	641358	303979	154616	273124	872939	526548	193626	549077
Medium	0.038	A8WGB1	Collagen and calcium-binding EGF domain-containing protein 1 OS=Danio rerio OX=7955 GN=ccbe1 PE=1 SV=2	5.138	0.975	5.40808e-05	0.847981	19964.4	429976	214455	581578	1.83702e+06	1.08404e+06	209033	1.04617e+06	14923.7	302699	168805	320148	1.07457e+06	758279	209033	668285
Medium	0.022	F1Q5J2	Mitogen-activated protein kinase kinase kinase OS=Danio rerio OX=7955 GN=map3k10 PE=3 SV=1	100	0.968	1.21569e-16	0.857614		12762.3	1.1467e+06	1.3449e+06	1.95117e+06	1.88934e+06	107738	1.73309e+06		8984.52	902608	740340	1.14134e+06	1.32159e+06	107738	1.10708e+06
Medium	0.039	Q5RG82	Influenza virus NS1A-binding protein homolog A OS=Danio rerio OX=7955 GN=ivns1abpa PE=2 SV=1	100	0.404	1.21569e-16	0.857614				215978	15348.6	25344.1		21341.3				118892	8978.17	17728.1		13632.6
High	0	B8JKN6	Peptidyl-prolyl cis-trans isomerase OS=Danio rerio OX=7955 GN=ppiaa PE=1 SV=1	0.374	0.96	0.00448367	0.857614	795692	539083	62256.7	255372	441215	245202	47327.2	619533	594794	379509	49004.5	140578	258089	171518	47327.2	395753
High	0.001	A0A2R8PZB2	Si:dkey-156n14.5 OS=Danio rerio OX=7955 GN=ddx17 PE=1 SV=1	2.563	0.955	0.103209	0.857614	96037.5	35704.8	167765	359125	162177	540868	104045	185418	71789.7	25135.8	132054	197692	94865.4	378335	104045	118444
High	0	A0A2R8Q1X2	2-phospho-D-glycerate hydro-lyase OS=Danio rerio OX=7955 GN=eno1a PE=1 SV=1	0.588	0.403	0.195231	0.857614	967750	655356	377459	609706	2.78381e+06	658399	132956	594130	723410	461364	297111	335632	1.62839e+06	460547	132956	379526
High	0	F6NJ58	Band 4.1-like protein 5 OS=Danio rerio OX=7955 GN=epb41l5 PE=1 SV=2	0.674	0.408	0.371289	0.857614	115836	67758	89824	146417	208227	170890	34895.1	141081	86589.5	47700.9	70703.8	80599.9	121802	119537	34895.1	90121.6
High	0	Q6P0T3	Zinc finger protein 207, a OS=Danio rerio OX=7955 GN=znf207a PE=2 SV=1	0.749	0.953	0.541772	0.857614	1.53745e+06	1.07785e+06	435174	1.01215e+06	3.12335e+06	964724	444864	1.85954e+06	1149273	758798	342541	557170	1.82701e+06	674820	444864	1.18786e+06
Medium	0.015	X1WFG5	Heat shock 110 kDa protein OS=Danio rerio OX=7955 GN=hsph1 PE=3 SV=1	0.778	0.406	0.621781	0.857614	135142	146077	95719.7	205580	336663	109363	20956.9	136551	101021	102837	75344.4	113168	196931	76498.7	20956.9	87227.8
High	0.001	F1QYG1	Eukaryotic translation initiation factor 2A OS=Danio rerio OX=7955 GN=eif2a PE=1 SV=1	0.787	0.405	0.643111	0.857614	220929	123774	163677	241186	466614	159840	59114.8	189064	165148	87135.9	128836	132768	272946	111807	59114.8	120772
High	0	Q6P3G9	Endoplasmic reticulum protein 44 OS=Danio rerio OX=7955 GN=erp44 PE=1 SV=1	1.677	0.956	0.679066	0.857614	734957	231883	629457	1.28201e+06	941211	1.22595e+06	304070	1.17462e+06	549393	163243	495469	705720	550563	857550	304070	750338
Medium	0.045	F1QTL9	Heterogeneous nuclear ribonucleoprotein A0b OS=Danio rerio OX=7955 GN=hnrnpa0b PE=1 SV=1	0.938	0.959	0.915465	0.857614	159779	70173.2	36975.3	123168	312472	118090	64933.8	151893	119438	49401.2	29104.6	67802	182781	82603.7	64933.8	97028
High	0	A0A140LG01	Myg1 exonuclease OS=Danio rerio OX=7955 GN=myg1 PE=1 SV=1	0.965	0.405	0.930883	0.857614	611120	498372	472214	559263	1.50045e+06	573018	189633	607135	456823	350849	371697	307864	877690	400824	189633	387834
High	0	A0A0R4ID68	ATP-dependent 6-phosphofructokinase OS=Danio rerio OX=7955 GN=pfklb PE=1 SV=2	0.968	0.4	0.930883	0.857614	186415	123292	130339	83568.6	545409	189441	30451.1	228479	139349	86796.6	102595	46003	319038	132513	30451.1	145951
High	0.001	Q8JHJ1	60S ribosomal protein L35 OS=Danio rerio OX=7955 GN=rpl35 PE=2 SV=3	1.151	0.957	0.991219	0.857614	347827	312295	197840	396643	404660	427820	155820	379448	260007	219852	155727	218344	236707	299258	155820	242389
High	0	Q6DRD2	26S protease regulatory subunit S10B OS=Danio rerio OX=7955 GN=psmc6 PE=1 SV=1	1.495	0.95	0.890632	0.863187	139205	62947.8	142975	144065	319830	183394		172515	104058	44314.6	112541	79305.3	187085	128283		110201
High	0	A0A0R4IE40	Myosin phosphatase Rho-interacting protein OS=Danio rerio OX=7955 GN=mprip PE=1 SV=1	1.228	0.946	0.984174	0.877858	860507	938520	575872	873618	1.17574e+06	916309	251877	917803	643244	660708	453290	480911	687753	640954	251877	586286
Medium	0.029	F1Q632	HECT-type E3 ubiquitin transferase OS=Danio rerio OX=7955 GN=nedd4l PE=1 SV=1	100	0.933	1.21569e-16	0.893231			239094	833970	325671	383166	223059	327373			188200	459085	190502	268023	223059	209123
Medium	0.015	Q5TYY5	Aldo-keto reductase family 1, member B1 (aldose reductase), tandem duplicate 1 OS=Danio rerio OX=7955 GN=akr1b1.1 PE=1 SV=2	100	0.418	1.21569e-16	0.893231			41986.6	27042.4	116384			17566.6			33049.2	14886.3	68079.1			11221.4
Medium	0.043	Q7ZV22	S-methyl-5'-thioadenosine phosphorylase OS=Danio rerio OX=7955 GN=mtap PE=2 SV=2	0.513	0.415	0.0892475	0.893231	127314	86493.3	68704.4	74540.9	170229	60205.4	26541.8	70728.6	95169.3	60890.3	54079.7	41033.4	99575.5	42113.5	26541.8	45180.9
High	0	F1R2K9	Ribonucleoside-diphosphate reductase OS=Danio rerio OX=7955 GN=rrm1 PE=1 SV=1	2.247	0.931	0.2156	0.893231	743539	548461	1.33986e+06	1.22334e+06	1.75652e+06	1.4624e+06	321924	1.80049e+06	555808	386111	1.05465e+06	673425	1.02748e+06	1.02295e+06	321924	1.15014e+06
High	0	Q6NWJ4	DnaJ homolog subfamily C member 2 OS=Danio rerio OX=7955 GN=dnajc2 PE=2 SV=1	1.846	0.942	0.506574	0.893231	783568	888682	2.47105e+06	3.09877e+06	3.09439e+06	2.90207e+06	942333	2.48935e+06	585731	625623	1.94505e+06	1.70582e+06	1.81007e+06	2.02999e+06	942333	1.59018e+06
High	0	A0A2R8RR81	Tropomyosin 3 OS=Danio rerio OX=7955 GN=tpm3 PE=1 SV=1	1.549	0.929	0.835908	0.893231	337965	105216	53105	192707	204290	182715		175547	252635	74070.9	41800.8	106082	119500	127808		112138
High	0	Q24JV3	60S ribosomal protein L31 OS=Danio rerio OX=7955 GN=rpl31 PE=1 SV=1	0.987	0.936	0.956945	0.893231	887464	863015	663418	991777	1.01118e+06	946116	645547	864182	663395	607553	522200	545955	591492	661804	645547	552034
High	0	C00052	TRYP_PIG	1.101	0.93	0.984174	0.893231	2.50644e+08	2.50644e+08	2.50644e+08	2.50644e+08	2.50644e+08	2.50644e+08	2.50644e+08	2.50644e+08	1.87361e+08	1.76451e+08	1.97291e+08	1.37975e+08	1.46614e+08	1.75324e+08	2.50644e+08	1.6011e+08
High	0.01	Q6P271	Sodium/potassium-transporting ATPase subunit alpha OS=Danio rerio OX=7955 GN=atp1a3a PE=1 SV=1	1.212	0.418	0.990512	0.893231	115948	93985.1	171906	448821	331975	138611	97192.1	142412	86673.2	66164.5	135313	247068	194189	96958	97192.1	90971.6
High	0	A2RUY5	Ubiquitin-associated protein 2b OS=Danio rerio OX=7955 GN=ubap2b PE=1 SV=1	1.183	0.935	0.991219	0.893231	1.33814e+06	1.27733e+06	1.15596e+06	1.44042e+06	2.19119e+06	1.86506e+06	1.26894e+06	1.11353e+06	1.00029e+06	899228	909898	792925	1.28174e+06	1.3046e+06	1.26894e+06	711318
High	0.002	F1RDP5	Queuine tRNA-ribosyltransferase catalytic subunit 1 OS=Danio rerio OX=7955 GN=qtrt1 PE=1 SV=1	1.061	0.925	0.97033	0.90582	405940	499547	397853	529084	881358	527702	368065	532147	303447	351676	313165	291251	515552	369126	368065	339932
Medium	0.016	Q7SXU7	RNA helicase OS=Danio rerio OX=7955 GN=ddx39b PE=1 SV=1	1.19	0.421	0.991219	0.912761	127103	49416	55998.5	93925.8	376266	144529	7579.69	158395	95011.9	34788.3	44078.4	51704.4	220098	101097	7579.69	101182
High	0	F1R314	Zgc:110425 OS=Danio rerio OX=7955 GN=zgc:110425 PE=1 SV=1	0.527	0.422	0.103209	0.913424	609732	637297	725559	854834	539908	328420	162130	360371	455785	448650	571114	470571	315820	229729	162130	230202
High	0	Q6DRK7	Serine/threonine-protein kinase PLK OS=Danio rerio OX=7955 GN=plk1 PE=1 SV=1	100	0.916	1.21569e-16	0.924552			212042	895174	230329	236570	194189	226358			166906	492777	134731	165480	194189	144596
High	0	Q6DRD5	Ubiquitin fusion degradation 1-like OS=Danio rerio OX=7955 GN=ufd1l PE=1 SV=1	0.46	0.423	0.0353464	0.924552	180414	166010	62781.4	155268	556065	79624.5	29199.4	223679	134862	116869	49417.5	85472.1	325271	55697	29199.4	142884
High	0	Q6IQJ2	Tubulin beta chain OS=Danio rerio OX=7955 GN=zgc:55461 PE=1 SV=1	1.463	0.425	0.912058	0.924552	3.42617e+06	1.67586e+06	6.24194e+06	1.25958e+07	9.38312e+06	5.94187e+06	997291	5.22246e+06	2.56112e+06	1.17979e+06	4.91326e+06	6.93374e+06	5.48866e+06	4.15631e+06	997291	3.33607e+06
High	0	F1R446	Spectrin alpha, non-erythrocytic 1 OS=Danio rerio OX=7955 GN=sptan1 PE=1 SV=1	1.417	0.915	0.923825	0.924552	251870	191718	50291	147751	257501	150058		138097	188277	134968	39585.8	81334.3	150626	104965		88215.2
High	0	Q6P124	GTPase-activating protein (SH3 domain)-binding protein 1 OS=Danio rerio OX=7955 GN=g3bp1 PE=1 SV=1	1.302	0.914	0.968679	0.924552	2.16657e+06	1.94599e+06	2.35089e+06	3.27763e+06	3.60191e+06	2.70025e+06	1.99763e+06	3.46711e+06	1.61955e+06	1.36996e+06	1.85047e+06	1.80427e+06	2.10694e+06	1.88882e+06	1.99763e+06	2.21477e+06
Medium	0.026	Q6Q419	40S ribosomal protein S29 OS=Danio rerio OX=7955 GN=rps29 PE=1 SV=1	0.891	0.428	0.869305	0.950107	255642	441507	522620	598464	693556	223768	620484	232078	191097	310816	411373	329443	405697	156525	620484	148250
High	0	F1Q750	Host cell factor C1a OS=Danio rerio OX=7955 GN=hcfc1a PE=1 SV=1	0.917	0.428	0.899323	0.950107	541222	515255	439174	1.14552e+06	1.4516e+06	530447	315365	543194	404573	362734	345690	630589	849115	371045	315365	346988
Medium	0.015	A0A140LGC3	Si:ch211-276i12.11 OS=Danio rerio OX=7955 GN=si:ch211-276i12.11 PE=1 SV=1	100	0.884	1.21569e-16	0.960447			344385	1.04569e+06	499496	742538	304326	504240			271078	575635	292181	519402	304326	322105
Medium	0.027	F1QP23	Glutamyl-tRNA synthetase OS=Danio rerio OX=7955 GN=eprs1 PE=1 SV=1	23.9	0.838	1.21569e-16	0.960447	12820.2		163008	330439	721935	333118	136608	306399	9583.29		128309	181901	422297	233015	136608	195726
Medium	0.044	E7EY20	Integrin-linked kinase-associated serine/threonine phosphatase OS=Danio rerio OX=7955 GN=ilkap PE=3 SV=1	100	0.79	1.21569e-16	0.960447			192731	282041	427198	242650	152222	232576			151705	155258	249890	169733	152222	148568
Medium	0.015	Q6P937	Clathrin light chain OS=Danio rerio OX=7955 GN=clta PE=1 SV=1	100	0.786	1.21569e-16	0.960447			540885	1.00211e+06	1.67336e+06	787723	431816	1.05015e+06			425750	551642	978832	551009	431816	670826
Medium	0.043	F1QFI0	Si:ch73-256j6.4 (Fragment) OS=Danio rerio OX=7955 GN=si:ch73-256j6.4 PE=4 SV=1	100	0.786	1.21569e-16	0.960447				133215	217613	165168	7662.61	177116				73332.6	127293	115534	7662.61	113140
Medium	0.032	F1Q9D6	Retinoblastoma 1 OS=Danio rerio OX=7955 GN=rb1 PE=1 SV=1	100	0.768	1.21569e-16	0.960447				51679.7	42320.6	32330.5		39900.6				28448.7	24755.5	22615		25488.2
Medium	0.026	E7F111	Guanylate cyclase OS=Danio rerio OX=7955 GN=gc2 PE=3 SV=1	100	0.739	1.21569e-16	0.960447			722981	1.24483e+06	1.39423e+06	919458	650685	953992			569084	685258	815555	643158	650685	609403
High	0	Q5U386	Protein-serine/threonine phosphatase OS=Danio rerio OX=7955 GN=ppm1bb PE=1 SV=1	100	0.514	1.21569e-16	0.960447			425133	384742	710195	307714	95218.8	306732			334638	211793	415430	215245	95218.8	195938
High	0.002	E7F5B6	Si:ch211-235e9.8 OS=Danio rerio OX=7955 GN=mgarpa PE=4 SV=1	100	0.509	1.21569e-16	0.960447			433460	572888	903302	307293	220539	382775			341192	315364	528388	214950	220539	244514
High	0.007	F1QYY6	CREB-regulated transcription coactivator 1b OS=Danio rerio OX=7955 GN=crtc1b PE=3 SV=3	100	0.478	1.21569e-16	0.960447			226895	298669	486049		119769	210446			178597	164412	284315		119769	134432
Medium	0.036	F1QGG3	Vesicle-fusing ATPase OS=Danio rerio OX=7955 GN=nsfb PE=1 SV=1	100	0.476	1.21569e-16	0.960447			79446.2	123561	297035	108174	29897	141499			62535	68018.3	173751	75667	29897	90388.3
Medium	0.042	F1QF45	Carbonyl reductase family member 4 OS=Danio rerio OX=7955 GN=cbr4 PE=1 SV=1	100	0.467	1.21569e-16	0.960447			246843	378778	609818	275346	115182	280647			194299	208510	356714	192603	115182	179275
High	0	Q6NYF7	ATP synthase-coupling factor 6, mitochondrial OS=Danio rerio OX=7955 GN=atp5pf PE=1 SV=1	100	0.463	1.21569e-16	0.960447			114467	361016	485000	138827	52960	257543			90101.4	198733	283701	97109	52960	164517
High	0	F1QV15	Phosvitin (Fragment) OS=Danio rerio OX=7955 GN=vtg6 PE=1 SV=1	9.109	0.433	3.39079e-09	0.960447	9767.68		106799	468490	555276	228072		75209.3	7301.51		84065.4	257895	324809	159536		48043.2
Medium	0.021	E7F8T6	Nicotinamide phosphoribosyltransferase OS=Danio rerio OX=7955 GN=nampt1 PE=1 SV=1	7.732	0.522	7.45516e-08	0.960447	32888.9			162862	547066	269853	89966.1	254287	24585			89652.6	320007	188761	89966.1	162437
High	0	Q6P6X9	Nucleoporin NUP35 OS=Danio rerio OX=7955 GN=nup35 PE=1 SV=1	4.713	0.838	0.000179945	0.960447		28073.9	110406	330250	150160	191600	92495.5	132325		19763.7	86904.2	181797	87836.2	134023	92495.5	84528.3
High	0.001	A5PN39	Crystallin, zeta (quinone reductase) OS=Danio rerio OX=7955 GN=cryz PE=1 SV=1	0.319	0.729	0.00073015	0.960447	371173	460301	127372	179402	436617	131886	92910.7	210584	277458	324047	100259	98757.3	255400	92253.9	92910.7	134520
High	0	Q6IQT8	RuvB-like helicase OS=Danio rerio OX=7955 GN=ruvbl1 PE=1 SV=1	0.372	0.846	0.00420507	0.960447	299243	246835	34212.5	111322	211361	123860		104406	223690	173769	26929.9	61280.5	123636	86639.4		66694.1
High	0	F1R300	Small nuclear ribonucleoprotein polypeptide A' OS=Danio rerio OX=7955 GN=snrpa1 PE=1 SV=1	0.405	0.779	0.0102253	0.960447	337052	286166	100094	214333	218119	241781	58830.6	158316	251952	201458	78787.7	117986	127589	169125	58830.6	101131
High	0	Q502F6	Zgc:112271 OS=Danio rerio OX=7955 GN=zgc:112271 PE=1 SV=1	2.782	0.802	0.0567578	0.960447	3.10348e+06	1.03766e+06	8.03636e+06	9.94094e+06	4.73413e+06	1.00465e+07	2.23609e+06	5.93272e+06	2.3199e+06	730505	6.32571e+06	5.47231e+06	2.76923e+06	7.02749e+06	2.23609e+06	3.78978e+06
High	0	Q6DHU8	Lymphokine-activated killer T-cell-originated protein kinase homolog OS=Danio rerio OX=7955 GN=pbk PE=2 SV=1	2.633	0.755	0.0892475	0.960447	63903.9	31690.2	142606	267297	120397	201717	25501.4	140355	47769.3	22309.5	112250	147142	70426.2	141100	25501.4	89658
Medium	0.036	R4KWC4	RING finger E3 ubiquitin-protein ligase transcript variant 5 OS=Danio rerio OX=7955 GN=rnf111 PE=2 SV=1	2.609	0.872	0.0942963	0.960447	39231.7		78935.7	156503	117326	98681.9		106186	29326.4		62133.1	86152.2	68630.2	69027.6		67831.1
High	0.001	A2BGG2	Zinc finger RNA-binding protein OS=Danio rerio OX=7955 GN=zfr PE=1 SV=1	0.527	0.519	0.103209	0.960447	457021	579733	189873	594862	753417	406335	98514.1	271500	341631	408126	149456	327461	440712	284230	98514.1	173432
High	0	F1QE65	Cytoplasmic FMR1-interacting protein OS=Danio rerio OX=7955 GN=cyfip1 PE=1 SV=1	2.511	0.78	0.11445	0.960447	94694.1	53441.1	322646	254474	212779	224741	57069.4	251607	70785.5	37621.9	253966	140083	124465	157205	57069.4	160725
High	0	F6NIQ9	GATA zinc finger domain-containing 2B (Fragment) OS=Danio rerio OX=7955 GN=gatad2b PE=1 SV=1	2.444	0.849	0.137122	0.960447	204942	74225.1	357841	1.01114e+06	975215	786858	207831	720053	153198	52253.7	281669	556617	570453	550404	207831	459965
High	0	A0A0R4IYT0	Insulin-like growth factor 2 mRNA-binding protein 3 OS=Danio rerio OX=7955 GN=igf2bp3 PE=1 SV=1	0.558	0.742	0.146707	0.960447	496906	308414	109627	218942	822491	225529	90271.3	360010	371446	217120	86291.6	120524	481117	157757	90271.3	229972
High	0	A0A2R8PXU3	High mobility group nucleosome-binding domain-containing protein 3 OS=Danio rerio OX=7955 GN=hmgn3 PE=1 SV=1	0.569	0.507	0.167659	0.960447	125503	173178	114590	141007	286694	58048.7	101491	95799.3	93815.4	121915	90197.8	77621.6	167702	40604.8	101491	61195.9
High	0.001	F1Q7F8	RNA-binding motif protein 4.2 OS=Danio rerio OX=7955 GN=rbm4.2 PE=1 SV=1	0.574	0.475	0.174059	0.960447	297730	447641	15306.7	237773	266521	112835	46345.1	122556	222558	315134	12048.4	130890	155902	78927.4	46345.1	78288
High	0	F1QAA7	Propionate--CoA ligase OS=Danio rerio OX=7955 GN=acss2 PE=1 SV=3	2.347	0.829	0.176558	0.960447	970725	472251	1.57258e+06	2.63253e+06	1.79193e+06	2.26296e+06	735272	1.54903e+06	725633	332460	1.23783e+06	1.44916e+06	1.04819e+06	1.58293e+06	735272	989510
High	0.009	B0V1J5	Checkpoint kinase 2 OS=Danio rerio OX=7955 GN=chek2 PE=1 SV=1	2.321	0.509	0.186848	0.960447	47609.9	23619.6	144134	221111	94286.4	108536	40506.7	112534	35589.2	16628	113453	121717	55152.9	75920.3	40506.7	71886
High	0	Q7ZUQ9	Cirbp protein OS=Danio rerio OX=7955 GN=cirbpb PE=1 SV=1	0.581	0.451	0.186848	0.960447	109868	125584	99641.4	278963	559501	94886.3	75636	266064	82128	88409.9	78431.4	153564	327281	66372.6	75636	169960
High	0.002	F1QGE6	Tumor susceptibility 101a OS=Danio rerio OX=7955 GN=tsg101a PE=1 SV=2	2.312	0.781	0.186924	0.960447	113767	57173.9	262416	359041	244457	337584	34042.1	205011	85042.7	40249.9	206557	197646	142996	236138	34042.1	130960
High	0	A0A0R4IPN8	Histone H2A OS=Danio rerio OX=7955 GN=h2az2b PE=3 SV=1	0.584	0.476	0.186924	0.960447	9.27361e+06	6.94441e+06	1.00824e+07	1.41126e+07	8.517e+06	6.47613e+06	3.98793e+06	6.7335e+06	6.93218e+06	4.88879e+06	7.93619e+06	7.76872e+06	4.98203e+06	4.53003e+06	3.98793e+06	4.30131e+06
High	0.007	A0JME6	Isochorismatase domain-containing protein 2 OS=Danio rerio OX=7955 GN=isoc2 PE=2 SV=1	2.288	0.85	0.196492	0.960447	196319	97036.9	353330	276996	333704	423360	267843	235471	146752	68313	278119	152481	195201	296139	267843	150417
High	0	F1Q7G3	Keratin 92 OS=Danio rerio OX=7955 GN=krt92 PE=1 SV=1	0.59	0.437	0.196492	0.960447	911166	855298	587712	922405	1.50709e+06	658083	249804	520768	681112	602121	462610	507767	881573	460326	249804	332663
High	0	F8W4B7	Histone deacetylase 6 OS=Danio rerio OX=7955 GN=hdac6 PE=1 SV=1	2.278	0.885	0.199381	0.960447	532496	238656	580501	1.21221e+06	842266	1.16255e+06	346072	981834	398050	168012	456934	667301	492684	813198	346072	627188
High	0	A2BIR4	Ubiquitin-conjugating enzyme E2L 3b OS=Danio rerio OX=7955 GN=ube2l3b PE=1 SV=1	0.603	0.789	0.219578	0.960447	363532	258980	407790	429590	717727	377271	317362	456201	271746	182319	320986	236482	419835	263900	317362	291418
High	0	Q6DHJ8	Pellino E3 ubiquitin protein ligase family member 2 OS=Danio rerio OX=7955 GN=peli2 PE=2 SV=1	2.225	0.843	0.22594	0.960447	88908.5	60284.3	192025	312091	148897	194106	136689	161922	66460.7	42439.5	151150	171800	87097.4	135776	136689	103434
High	0	A0A2R8QNE6	Protein RCC2 homolog OS=Danio rerio OX=7955 GN=rcc2 PE=1 SV=1	2.226	0.779	0.22594	0.960447	1.75339e+07	9.8487e+06	2.78705e+07	5.15209e+07	3.29999e+07	3.68428e+07	1.8745e+07	3.44453e+07	1.31069e+07	6.93338e+06	2.19379e+07	2.83613e+07	1.93033e+07	2.57714e+07	1.8745e+07	2.20034e+07
High	0	R4GE02	Si:ch211-113a14.11 OS=Danio rerio OX=7955 GN=si:ch211-113a14.11 PE=1 SV=1	0.611	0.51	0.232367	0.960447	1.69425e+07	1.15058e+07	1.85724e+07	2.27235e+07	1.41327e+07	9.42229e+06	6.33881e+06	8.37235e+06	1.26648e+07	8.09996e+06	14619002	1.25089e+07	8.26694e+06	6.59085e+06	6.33881e+06	5.34819e+06
High	0.008	X1WC76	Si:dkey-108k21.24 (Fragment) OS=Danio rerio OX=7955 GN=si:dkey-108k21.24 PE=3 SV=1	2.186	0.729	0.24342	0.960447	609577	70064.4	521481	759164	573866	553072	368882	502749	455669	49324.6	410477	417906	335683	386872	368882	321153
High	0	F1QM02	ELAV-like protein OS=Danio rerio OX=7955 GN=elavl1a PE=1 SV=1	2.13	0.862	0.282995	0.960447	89038.7		108961	290938	307134	264683	94032.5	189649	66558		85767.4	160156	179658	185145	94032.5	121146
High	0.002	P62247	40S ribosomal protein S8 OS=Danio rerio OX=7955 GN=rps8 PE=2 SV=2	2.107	0.76	0.300622	0.960447	124216	70020.6	118846	261066	271386	345200	23179.5	198389	92853.6	49293.8	93548.3	143712	158748	241466	23179.5	126729
High	0	F1QUV7	Diadenosine tetraphosphate synthetase OS=Danio rerio OX=7955 GN=gars1 PE=1 SV=2	2.085	0.847	0.318679	0.960447	491264	316407	884454	1.43309e+06	1.91673e+06	1.56806e+06	138201	1.39171e+06	367229	222747	696186	788888	1.1212e+06	1.09685e+06	138201	889013
Medium	0.043	B0S6Y2	Zinc finger, C3HC-type-containing 1 OS=Danio rerio OX=7955 GN=zc3hc1 PE=1 SV=1	2.075	0.523	0.32189	0.960447	70430.5	47966.8	110353	284707	150964	148877	38592.3	143414	52648	33768.2	86863.2	156726	88306.6	104139	38592.3	91612.1
High	0.002	A0A2R8PX02	Cytoplasmic FMR1-interacting protein OS=Danio rerio OX=7955 GN=cyfip2 PE=1 SV=1	2.054	0.505	0.339514	0.960447	132462	59818.3	417804	454618	258014	307258	108776	210793	99017.8	42111.4	328868	250259	150926	214926	108776	134653
High	0	Q7SZP2	UPF0690 protein C1orf52 homolog OS=Danio rerio OX=7955 GN=zgc:65873 PE=1 SV=1	0.659	0.514	0.34156	0.960447	580742	770150	623509	963707	1.29545e+06	719066	319679	425208	434115	542178	490786	530503	757772	502984	319679	271620
High	0	Q7T3B1	26S proteasome AAA-ATPase subunit RPT1 OS=Danio rerio OX=7955 GN=psmc2 PE=1 SV=1	2.043	0.847	0.343946	0.960447	228589	139428	637609	740264	1.29506e+06	765700	119757	885165	170874	98155.9	501885	407502	757546	535604	119757	565437
Medium	0.015	E7EZD1	Neurobeachin a OS=Danio rerio OX=7955 GN=nbeaa PE=1 SV=2	0.664	0.455	0.351998	0.960447	70476.8		43597.3	115438	139778	46821	29096	63570.1	52682.6		34317	63546.6	81763.6	32751.1	29096	40608.1
High	0	F1RB32	ADP-ribosylation factor GTPase-activating protein 2 OS=Danio rerio OX=7955 GN=arfgap2 PE=1 SV=1	0.669	0.449	0.363026	0.960447	598505	683111	402952	617403	1.25948e+06	609776	142363	465560	447393	480903	317178	339869	736732	426536	142363	297397
High	0	B5DE31	Y-box-binding protein 1 OS=Danio rerio OX=7955 GN=ybx1 PE=1 SV=1	0.671	0.763	0.365563	0.960447	242187	316572	178552	279173	526486	164512	171868	386836	181039	222863	140545	153680	307968	115076	171868	247108
High	0	F1Q8B0	Ag1 OS=Danio rerio OX=7955 GN=agr1 PE=1 SV=1	0.677	0.8	0.376394	0.960447	145269	112291	143988	294932	1.26024e+06	337199	77734.7	298338	108591	79051.7	113338	162355	737181	235869	77734.7	190576
High	0.01	Q5XJ36	Parkinson disease protein 7 homolog OS=Danio rerio OX=7955 GN=park7 PE=2 SV=1	0.679	0.743	0.37772	0.960447	200828	122907		87190	236904	103008		110564	150122	86525.5		47996.5	138577	72053.5		70627.3
High	0.002	A2AR72	Si:dkey-78k11.9 OS=Danio rerio OX=7955 GN=si:dkey-78k11.9 PE=4 SV=1	0.686	0.803	0.390069	0.960447	5.4908e+06	8.14274e+06	4.28823e+06	5.74067e+06	9.47704e+06	3.44507e+06	5.36059e+06	5.81481e+06	4.10447e+06	5.7324e+06	3375424	3.16013e+06	5.54361e+06	2409814	5.36059e+06	3.71446e+06
Medium	0.021	F1QWX4	Sepiapterin reductase OS=Danio rerio OX=7955 GN=spra PE=1 SV=1	0.697	0.509	0.424059	0.960447	94495.5	94006	52296.8	63109.1	228646	65704.8	26639.3	95323	70637	66179.2	41164.7	34740.4	133747	45960.2	26639.3	60891.7
Medium	0.015	F1QF15	Actin-related protein 2 OS=Danio rerio OX=7955 GN=actr2a PE=1 SV=1	1.933	0.77	0.426813	0.960447	69588.2	34536	31424.5	123123	165495	103925		86378.1	52018.4	24313	24735.3	67777.2	96806.5	72694.9		55177.7
High	0.01	F1R8B4	GCN1 activator of EIF2AK4 OS=Danio rerio OX=7955 GN=gcn1 PE=1 SV=3	1.913	0.467	0.444043	0.960447	13919.3		51937.2	54820	72175.6	24897.7		28471.8	10404.9		40881.6	30177.4	42219.2	17415.8		18187.6
High	0	A1L231	Condensin complex subunit 2 OS=Danio rerio OX=7955 GN=ncaph PE=1 SV=1	0.707	0.514	0.446128	0.960447	227402	304131	237816	422166	479528	185930	122217	270249	169987	214105	187194	232395	280501	130057	122217	172633
High	0.01	F1RDC1	Aurora kinase OS=Danio rerio OX=7955 GN=aurkb PE=1 SV=2	1.89	0.793	0.463294	0.960447	126537	112719	151572	305968	235140	242765	93390.1	235689	94588.7	79353.1	119308	168430	137545	169813	93390.1	150556
High	0	Q5RFW4	Protein-L-isoaspartate O-methyltransferase OS=Danio rerio OX=7955 GN=pcmt PE=1 SV=1	0.714	0.518	0.463294	0.960447	821238	499800	259395	841948	1.54404e+06	600454	185712	587450	613890	351854	204179	463477	903187	420015	185712	375259
Medium	0.039	A0A286YAR8	Rho/rac guanine nucleotide exchange factor (GEF) 18b OS=Danio rerio OX=7955 GN=arhgef18b PE=1 SV=1	0.719	0.827	0.474073	0.960447	3.92042e+06	4.65875e+06	2.37946e+06	3.13844e+06	6.37373e+06	1.96696e+06	3453121	3.2489e+06	2.93058e+06	3.27971e+06	1.87296e+06	1.72765e+06	3728322	1.37588e+06	3453121	2.07537e+06
Medium	0.033	A0A2R8RZ26	WD_REPEATS_REGION domain-containing protein OS=Danio rerio OX=7955 GN=wdr70 PE=1 SV=1	0.729	0.444	0.499831	0.960447	51462.9	47423.8	45053.8	66447.2	98504.8	43690.9	14737.1	36008.9	38469.4	33385.9	35463.5	36577.9	57620.5	30561.6	14737.1	23002.2
High	0	A0A0R4IU36	Aly/REF export factor OS=Danio rerio OX=7955 GN=alyref PE=1 SV=2	0.736	0.486	0.522502	0.960447	816252	554162	381050	1.18547e+06	1.49318e+06	496763	242213	726407	610162	390125	299938	652577	873435	347483	242213	464024
High	0	A0A2R8QFM8	Dihydropyrimidinase-related protein 2 OS=Danio rerio OX=7955 GN=dpysl2b PE=1 SV=1	1.828	0.864	0.530013	0.960447	1.31573e+06	1.01034e+06	2.18219e+06	3.22061e+06	4.48971e+06	3.0683e+06	830622	3.17648e+06	983528	711269	1.71768e+06	1.77288e+06	2.62626e+06	2.14627e+06	830622	2.02911e+06
High	0	A2BGE5	Apoptosis-inducing factor mitochondrion-associated 1 OS=Danio rerio OX=7955 GN=aifm1 PE=1 SV=1	0.741	0.443	0.53582	0.960447	871110	342845	395614	1.02188e+06	1.67038e+06	850381	93562	770520	651170	241360	311402	562527	977088	594838	93562	492202
High	0.001	Q6P3J8	L-threonine dehydrogenase OS=Danio rerio OX=7955 GN=tdh PE=1 SV=1	1.804	0.82	0.541772	0.960447	182470	58508.2	287705	288878	258438	315646	89208	263682	136400	41189.2	226463	159022	151174	220793	89208	168438
High	0	A0A0R4IGN3	Protein disulfide-isomerase (Fragment) OS=Danio rerio OX=7955 GN=pdia3 PE=1 SV=1	1.807	0.779	0.541772	0.960447	1.17413e+06	571410	1.04697e+06	2.58568e+06	2.42982e+06	2.20366e+06	463564	1.91632e+06	877685	402267	824112	1.42337e+06	1.42133e+06	1.54145e+06	463564	1.22413e+06
High	0	F1QJE5	Protein phosphatase, Mg2+/Mn2+-dependent, 1G OS=Danio rerio OX=7955 GN=ppm1g PE=1 SV=2	1.802	0.506	0.541772	0.960447	122066	81149.8	292288	827899	433613	315305	83282.2	320454	91246.2	57128.6	230071	455743	253642	220555	83282.2	204703
High	0	F1QB50	Thymopoietin b OS=Danio rerio OX=7955 GN=tmpob PE=1 SV=1	0.751	0.478	0.545906	0.960447	3.37278e+06	3.29667e+06	1.39295e+06	6.5935e+06	5.94313e+06	2.21696e+06	1.32418e+06	3.22526e+06	2.52121e+06	2.32082e+06	1.09644e+06	3.6296e+06	3476444	1.55076e+06	1.32418e+06	2.06027e+06
High	0.002	A5PM68	Polypyrimidine tract-binding protein 2b OS=Danio rerio OX=7955 GN=ptbp2b PE=1 SV=1	0.759	0.439	0.573735	0.960447	177956	79370.3	22552.5	128428	313325	132870	8142.33	137421	133025	55875.8	17751.9	70697.2	183280	92941.8	8142.33	87783.3
Medium	0.015	Q502J7	Dynactin subunit 6 OS=Danio rerio OX=7955 GN=dctn6 PE=2 SV=1	0.768	0.482	0.597141	0.960447	203357	133780	152529	246929	451840	191806	83593.3		152013	94179.4	120061	135930	264305	134167	83593.3
High	0	A0A2R8QDD8	Protein-serine/threonine phosphatase OS=Danio rerio OX=7955 GN=ppm1aa PE=1 SV=1	0.766	0.468	0.597141	0.960447	200472	172731	240793	193009	488543	201494	100947		149856	121601	189537	106248	285774	140944	100947
High	0	F1R184	Thioredoxin domain-containing 5 OS=Danio rerio OX=7955 GN=txndc5 PE=1 SV=1	1.753	0.506	0.60191	0.960447	497757	282579	741558	2.47681e+06	1.09041e+06	938355	484544	678572	372082	198932	583707	1.36344e+06	637839	656375	484544	433467
High	0.003	Q6DH51	Polyglutamine tract-binding protein 1 OS=Danio rerio OX=7955 GN=pqbp1 PE=1 SV=1	0.774	0.493	0.606723	0.960447	129282	168248	106042	197720	337977	166785	46572.8	114100	96640.2	118445	83469.5	108841	197700	116665	46572.8	72886.4
Medium	0.015	F1Q728	Coronin OS=Danio rerio OX=7955 GN=coro1b PE=3 SV=1	0.782	0.506	0.628097	0.960447	72223.7		36135.8	59809.5	164808	56464.3	17129.2	83363	53988.5		28443.8	32924	96404.8	39496.5	17129.2	53251.7
High	0	A0A2R8Q7R6	Enhancer of mRNA-decapping protein 4 OS=Danio rerio OX=7955 GN=edc4 PE=1 SV=1	1.704	0.819	0.648399	0.960447	88961.8	90636.5	105206	308761	185123	153033	86211.1	164533	66500.5	63807.2	82811.8	169967	108288	107046	86211.1	105103
High	0	A0A2R8QL35	Tyrosine-protein phosphatase non-receptor type OS=Danio rerio OX=7955 GN=ptpn11a PE=1 SV=1	1.705	0.465	0.648399	0.960447	81407.5		94271.9	589297	109614	170112	82517.6	118551	60853.5		74204.9	324397	64118.7	118993	82517.6	75729.8
High	0	Q7T1J9	Ribosomal protein S10 OS=Danio rerio OX=7955 GN=rps10 PE=1 SV=1	0.793	0.454	0.648399	0.960447	1.08093e+06	1.35473e+06	746117	1.32162e+06	3.22188e+06	847234	317230	1.2521e+06	808010	953719	587296	727529	1.88464e+06	592637	317230	799830
High	0	Q6NWJ5	Tubulin alpha chain OS=Danio rerio OX=7955 GN=tuba8l4 PE=1 SV=1	1.706	0.447	0.648399	0.960447	2.38898e+07	1.58091e+07	5.01856e+07	8.77155e+07	7.26796e+07	3.94106e+07	1.03113e+07	3.56352e+07	1.7858e+07	1.11295e+07	3.95029e+07	4.82858e+07	4.2514e+07	2.75676e+07	1.03113e+07	2.27635e+07
High	0	F1QXV8	Phosphoglycerate kinase OS=Danio rerio OX=7955 GN=pgk1 PE=1 SV=1	0.793	0.445	0.648399	0.960447	1.7812e+06	1.06311e+06	952217	1.75265e+06	4.14466e+06	1.54991e+06	349799	1.37714e+06	1.33148e+06	748419	749525	964800	2.42442e+06	1.08416e+06	349799	879707
High	0	A0A0R4IPH2	Tubulin beta chain OS=Danio rerio OX=7955 GN=tubb2b PE=1 SV=1	1.699	0.468	0.649468	0.960447	2.61727e+07	1.33129e+07	4.86202e+07	1.06342e+08	7.12961e+07	4.42292e+07	1.09509e+07	3.86726e+07	1.95645e+07	9.37216e+06	3.82707e+07	5.85394e+07	4.17047e+07	3.09382e+07	1.09509e+07	2.47038e+07
High	0	Q6P2T6	Cysteine and glycine-rich protein 2 OS=Danio rerio OX=7955 GN=csrp2 PE=2 SV=1	1.697	0.764	0.651267	0.960447	82306.6	89658.2	93560.1	642764	305345	328035	26347.7	262250	61525.6	63118.4	73644.5	353830	178612	229459	26347.7	167524
High	0	Q7SXX7	Multivesicular body subunit 12A OS=Danio rerio OX=7955 GN=mvb12a PE=2 SV=1	1.694	0.768	0.654341	0.960447	112080	45824.7	73468.1	315086	185096	253447	32930.4	142221	83781.4	32260.1	57829.4	173449	108272	177285	32930.4	90850.1
High	0	A0A0R4IQT3	Calcium/calmodulin-dependent protein kinase OS=Danio rerio OX=7955 GN=camk2g2 PE=1 SV=1	1.692	0.523	0.655433	0.960447	228831	57912.6	260950	687117	693847	391037	60732.7	356989	171055	40769.9	205404	378245	405866	273529	60732.7	228042
High	0	A0A2R8PY75	Isocitrate dehydrogenase [NAD] subunit, mitochondrial OS=Danio rerio OX=7955 GN=idh3b PE=1 SV=1	0.799	0.489	0.655433	0.960447	2.06711e+06	1.69147e+06	1.54697e+06	2.36386e+06	4.3149e+06	1.51345e+06	537798	1.8544e+06	1.5452e+06	1.19078e+06	1.21768e+06	1.30126e+06	2.52401e+06	1.05865e+06	537798	1.18458e+06
High	0	Q6PBY3	Endothelial differentiation-related factor 1 homolog OS=Danio rerio OX=7955 GN=edf1 PE=2 SV=1	1.666	0.843	0.687539	0.960447	115603	93214	151433	671709	642793	435945	45697.1	561847	86415.3	65621.7	119198	369763	376003	304941	45697.1	358904
High	0	F1QYU7	S-adenosylmethionine synthase OS=Danio rerio OX=7955 GN=mat2aa PE=1 SV=1	1.665	0.756	0.687539	0.960447	3.85258e+06	2.10994e+06	5.61965e+06	9.60644e+06	7.18996e+06	7.37009e+06	2.16962e+06	6.3766e+06	2.87987e+06	1.48538e+06	4.42343e+06	5.28817e+06	4.20578e+06	5.15535e+06	2.16962e+06	4.07333e+06
High	0	A0A2R8RVU0	Tubulin alpha chain OS=Danio rerio OX=7955 GN=tuba4l PE=1 SV=1	1.669	0.521	0.687539	0.960447	5.23333e+06	3.9416e+06	5.89674e+06	1.2171e+07	1.33474e+07	7.14471e+06	1.09233e+06	8.02428e+06	3.912e+06	2.77485e+06	4.64154e+06	6.6999e+06	7.8076e+06	4.99769e+06	1.09233e+06	5.12585e+06
High	0.001	A0A0R4INK2	UDP-N-acetylglucosamine pyrophosphorylase 1 OS=Danio rerio OX=7955 GN=uap1 PE=1 SV=1	0.813	0.477	0.689677	0.960447	217999	102947	70448.7	209923	637844	164170	33598.3	191281	162958	72473.9	55452.7	115559	373107	114836	33598.3	122189
High	0	F1QCV9	Multivesicular body subunit 12Ba OS=Danio rerio OX=7955 GN=mvb12ba PE=3 SV=2	1.656	0.499	0.696202	0.960447	318552	65188.3	414714	852933	633166	606474	146727	290037	238123	45891.9	326436	469524	370371	424226	146727	185273
High	0	A0A0R4IFJ4	Pyruvate carboxylase OS=Danio rerio OX=7955 GN=pcxa PE=1 SV=1	0.821	0.44	0.710746	0.960447	2.32051e+06	1.37641e+06	1.15112e+06	1.5581e+06	4.63335e+06	1.50358e+06	386417	1.5691e+06	1.73462e+06	968981	906085	857707	2.71028e+06	1.05175e+06	386417	1.00233e+06
Medium	0.016	F1R405	BCL9 transcription coactivator OS=Danio rerio OX=7955 GN=bcl9 PE=1 SV=1	0.827	0.522	0.730522	0.960447	172136	101404	95690	128587	338255	122061	49994.4	166196	128675	71387.4	75321	70785	197862	85381.5	49994.4	106165
High	0	A0A0R4ICI1	Mitogen-activated protein kinase kinase kinase kinase 4 OS=Danio rerio OX=7955 GN=map4k4 PE=1 SV=1	1.622	0.878	0.742417	0.960447	451481	195270	447007	565178	1.08041e+06	619971	61016.6	786917	337490	137468	351856	311120	631988	433668	61016.6	502677
High	0	Q7SXA3	40S ribosomal protein S27a OS=Danio rerio OX=7955 GN=rps27a PE=1 SV=1	0.832	0.531	0.742417	0.960447	2.07843e+06	1.54472e+06	1.41164e+06	4.43568e+06	4.88687e+06	2.58856e+06	604904	2.59267e+06	1.55366e+06	1.08746e+06	1.11116e+06	2.44176e+06	2.85858e+06	1.81069e+06	604904	1.65618e+06
High	0	Q7ZVB2	4-trimethylaminobutyraldehyde dehydrogenase A OS=Danio rerio OX=7955 GN=aldh9a1a PE=2 SV=1	1.618	0.816	0.744858	0.960447	1.34137e+06	1.30299e+06	1.82612e+06	4.41798e+06	5.65502e+06	5.28166e+06	755955	3.60508e+06	1.0027e+06	917295	1.43741e+06	2.43202e+06	3.30791e+06	3.6945e+06	755955	2.3029e+06
High	0	Q6NV34	Peroxisomal 2,4-dienoyl-CoA reductase [(3E)-enoyl-CoA-producing] OS=Danio rerio OX=7955 GN=decr2 PE=2 SV=1	0.835	0.456	0.744858	0.960447	597647	450037	660600	1.17624e+06	1.02835e+06	465382	178875	527297	446752	316821	519982	647498	601537	325533	178875	336834
High	0.001	Q1L8Y7	Leucine-rich repeat protein SHOC-2 OS=Danio rerio OX=7955 GN=shoc2 PE=2 SV=1	0.837	0.517	0.751858	0.960447	120122	107531	105355	140025	213721	95180.4	51008.8	110578	89793.5	75700.7	82928.7	77081.2	125016	66578.3	51008.8	70636.5
High	0	Q6NW90	Tubulin beta chain OS=Danio rerio OX=7955 GN=tubb5 PE=1 SV=1	1.606	0.436	0.760074	0.960447	2.29726e+06	1.26552e+06	4.22705e+06	9.404e+06	6.24818e+06	3.83826e+06	1.09475e+06	3.26341e+06	1.71724e+06	890914	3.32727e+06	5.17673e+06	3.65488e+06	2.68485e+06	1.09475e+06	2.08464e+06
Medium	0.039	B8A6A3	NFU1 iron-sulfur cluster scaffold homolog, mitochondrial OS=Danio rerio OX=7955 GN=zgc:110319 PE=1 SV=1	1.603	0.77	0.760286	0.960447	17257.1	20595.5	34026.6	231546	33975.7	26162.3	29263.5	38934.8	12900	14499	26783.5	127462	19874.1	18300.4	29263.5	24871.2
High	0.001	Q6NX98	ST13 Hsp70-interacting protein OS=Danio rerio OX=7955 GN=st13 PE=1 SV=1	1.603	0.753	0.760286	0.960447	443780	125602	413429	906933	967115	771040	207778	686845	331733	88422.4	325425	499250	565715	539339	207778	438751
High	0.004	X1WD72	Si:ch211-15d5.11 OS=Danio rerio OX=7955 GN=si:ch211-15d5.11 PE=4 SV=1	1.596	0.477	0.769566	0.960447	11687.8				39113.1	16754		20779.4	8736.84				22879.3	11719.3		13273.7
High	0	Q6PBW8	Lysophospholipase 2 OS=Danio rerio OX=7955 GN=lypla2 PE=1 SV=1	0.849	0.521	0.777017	0.960447	4.24766e+06	2.63187e+06	3.1531e+06	3.28696e+06	9.31435e+06	3.62415e+06	1.21715e+06	3.59498e+06	3.1752e+06	1.85281e+06	2.48192e+06	1.80941e+06	5.44844e+06	2.53508e+06	1.21715e+06	2.29645e+06
High	0	Q9DEG7	C-terminal-binding protein 1 OS=Danio rerio OX=7955 GN=ctbp1 PE=1 SV=1	1.583	0.756	0.79146	0.960447	1.32889e+06	616247	1.3758e+06	2.64967e+06	2.78485e+06	2.62616e+06	501190	2.03054e+06	993367	433832	1.08294e+06	1458595	1.629e+06	1.83699e+06	501190	1.29709e+06
Medium	0.027	A2BIC6	Cysteinylglycine-S-conjugate dipeptidase OS=Danio rerio OX=7955 GN=lap3 PE=1 SV=1	0.859	0.445	0.803557	0.960447	201816	163357	158173	205269	553505	174419	70389.1	172169	150861	115002	124504	112997	323773	122005	70389.1	109981
High	0	F1QE34	Ankyrin repeat and MYND domain-containing 2a OS=Danio rerio OX=7955 GN=ankmy2a PE=1 SV=1	0.863	0.496	0.817489	0.960447	325790	203004	129434	361306	594353	267842	42222	294910	243534	142912	101882	198893	347667	187354	42222	188386
High	0	F1QEY8	D-3-phosphoglycerate dehydrogenase OS=Danio rerio OX=7955 GN=phgdh PE=1 SV=1	1.552	0.467	0.833108	0.960447	4.29536e+06	2.59759e+06	4.01645e+06	1.42769e+07	8.35933e+06	6.72322e+06	1.56952e+06	4.95477e+06	3.21086e+06	1.82868e+06	3.16149e+06	7.85918e+06	4.8898e+06	4.70287e+06	1.56952e+06	3.16507e+06
High	0	Q6NZV4	Cysteine and glycine-rich protein 1 OS=Danio rerio OX=7955 GN=csrp1a PE=1 SV=1	0.873	0.765	0.835908	0.960447	349421	578186	224237	308657	1.44867e+06	645515	133353	771594	261198	407037	176505	169910	847403	451535	133353	492889
High	0	F1QZU7	Aldehyde dehydrogenase 2 family member, tandem duplicate 2 OS=Danio rerio OX=7955 GN=aldh2.2 PE=1 SV=2	1.546	0.528	0.835908	0.960447	1.31658e+06	750014	1.45585e+06	3.1675e+06	3.74078e+06	2.0906e+06	245339	1.79047e+06	984167	528002	1.14595e+06	1.74365e+06	2.18817e+06	1.46237e+06	245339	1.14374e+06
High	0	F1QIC0	Cystathionine beta-synthase OS=Danio rerio OX=7955 GN=cbsb PE=1 SV=1	1.538	0.516	0.851656	0.960447	240247	222173	1.69133e+06	2.74063e+06	1.68164e+06	916701	1.08992e+06	795314	179589	156407	1.3313e+06	1.50866e+06	983675	641229	1.08992e+06	508041
High	0	A0A2R8QTX4	ELAV-like protein OS=Danio rerio OX=7955 GN=elavl1b PE=1 SV=1	1.528	0.865	0.854224	0.960447	235004	118012	219441	356142	428300	385991	179607	310152	175669	83079.2	172730	196050	250535	269999	179607	198123
Medium	0.019	Q6PBW9	Ribulose-phosphate 3-epimerase OS=Danio rerio OX=7955 GN=rpe PE=1 SV=1	0.879	0.469	0.854224	0.960447	123643	133742	145140	144169	259179	121523	67201.7	113836	92425.6	94152.9	114245	79362.1	151607	85004.9	67201.7	72717.8
Medium	0.021	A0A0R4IGJ6	Protein phosphatase 1, regulatory subunit 9Bb OS=Danio rerio OX=7955 GN=ppp1r9bb PE=4 SV=1	1.521	0.75	0.867251	0.960447	95065.6	70150.2	102619	200317	158005	118360	102768	150204	71063.1	49385	80774.9	110271	92425.1	82792.5	102768	95949.3
High	0.002	A0A0R4IZ33	Toll-interacting protein OS=Danio rerio OX=7955 GN=tollip PE=1 SV=1	0.891	0.734	0.869305	0.960447	178237	197785	73358.7	184778	413106	167268	53869.7	215557	133235	139239	57743.3	101717	241647	117003	53869.7	137696
High	0	F1R9Y9	Electron transfer flavoprotein subunit beta OS=Danio rerio OX=7955 GN=etfb PE=1 SV=1	0.891	0.441	0.869305	0.960447	872201	602793	568200	1.60047e+06	2.58041e+06	687585	332518	715154	651985	424360	447250	881032	1.50941e+06	480963	332518	456835
Medium	0.018	F6NSX9	Zinc finger protein 687b OS=Danio rerio OX=7955 GN=znf687b PE=2 SV=1	0.895	0.528	0.8744	0.960447	59626.8	68063.1	37730.3	110397	121869	57606.6	38512	64388.4	44572	47915.7	29698.9	60771.7	71287.2	40295.6	38512	41130.8
High	0	Q8JHI0	ADP/ATP translocase OS=Danio rerio OX=7955 GN=slc25a5 PE=1 SV=1	0.899	0.49	0.885541	0.960447	5.9656e+06	5.29423e+06	5.652e+06	1.25466e+07	1.66698e+07	5.77131e+06	2.33074e+06	6.35876e+06	4.45939e+06	3.72708e+06	4.44889e+06	6.90665e+06	9.75105e+06	4.03701e+06	2.33074e+06	4.06193e+06
Medium	0.031	Q6P105	ELAV-like protein OS=Danio rerio OX=7955 GN=elavl3 PE=1 SV=1	0.909	0.859	0.890632	0.960447	130131	75745.9	67385.1	107833	170242	137133	57881.8	102045	97275.4	53324.3	53041.3	59359.8	99583.3	95924	57881.8	65185.4
High	0	F1QNJ3	Testin OS=Danio rerio OX=7955 GN=tes PE=1 SV=1	1.491	0.841	0.890632	0.960447	1.0553e+06	1.18845e+06	961899	2.03336e+06	4.25352e+06	1.88745e+06	419343	2.03037e+06	788856	836659	757145	1.11933e+06	2.4881e+06	1.32027e+06	419343	1.29698e+06
High	0	A9JRU2	Pyruvate dehyrogenase phosphatase catalytic subunit 1 OS=Danio rerio OX=7955 GN=pdp1 PE=1 SV=1	0.908	0.806	0.890632	0.960447	455140	394271	251057	367132	1.01518e+06	392553	202381	434738	340225	277563	197616	202100	593833	274590	202381	277708
High	0.007	A0A2R8Q4X2	Mediator of RNA polymerase II transcription subunit 1 OS=Danio rerio OX=7955 GN=med1 PE=1 SV=1	1.484	0.735	0.890632	0.960447	88054.3	71644.1	113913	202676	168343	123690	94207.8	138141	65822.1	50436.7	89665.4	111569	98472.2	86521	94207.8	88243.2
High	0	Q52JI7	Beta-A4 crystallin OS=Danio rerio OX=7955 GN=cryba4 PE=1 SV=1	0.907	0.728	0.890632	0.960447	2.18511e+07	1.69626e+07	1.05536e+07	2.41418e+07	4.88991e+07	2.03928e+07	8.98216e+06	2.8179e+07	1.63341e+07	1.19415e+07	8.30714e+06	1.32896e+07	2.86036e+07	1.42647e+07	8.98216e+06	1.80005e+07
Medium	0.039	B0S7C9	GDP-4-keto-6-deoxy-D-mannose-3,5-epimerase-4-reductase OS=Danio rerio OX=7955 GN=gfusl2 PE=3 SV=1	0.905	0.499	0.890632	0.960447	141197	136764	136879	114393	274948	125785	48103.3	137110	105547	96280.2	107742	62971	160831	87985.9	48103.3	87585.1
High	0.001	A4QN36	Pellino E3 ubiquitin protein ligase 1b OS=Danio rerio OX=7955 GN=peli1b PE=2 SV=1	1.478	0.78	0.894809	0.960447	140907	86244.9	167222	286993	209053	203408	130446	200879	105331	60715.5	131626	157984	122286	142283	130446	128320
High	0	B0UXS6	Heat shock cognate 70-kd protein, tandem duplicate 1 OS=Danio rerio OX=7955 GN=hsp70.1 PE=2 SV=1	0.912	0.506	0.894809	0.960447	2.98276e+06	3.16832e+06	4.68378e+06	5.76093e+06	3.77822e+06	2.91612e+06	1.76582e+06	2.86614e+06	2229665	2.23047e+06	3.68677e+06	3171288	2.21008e+06	2.03982e+06	1.76582e+06	1.83087e+06
High	0	A5PN62	Dimethylargininase OS=Danio rerio OX=7955 GN=ddah2 PE=1 SV=1	0.911	0.504	0.894809	0.960447	441826	331811	246753	499745	850653	378024	109550	428889	330272	233591	194228	275101	497591	264427	109550	273972
High	0	A7MCL7	Cystatin 14a, tandem duplicate 2 OS=Danio rerio OX=7955 GN=cst14a.2 PE=1 SV=1	1.449	0.882	0.912058	0.960447	1.15386e+06	1.32884e+06	1.49683e+06	2.02057e+06	2.91027e+06	3.31364e+06	624869	2.03026e+06	862530	935488	1.17821e+06	1.11229e+06	1.70237e+06	2.31788e+06	624869	1.29691e+06
High	0	U3JAH9	BUB3 mitotic checkpoint protein OS=Danio rerio OX=7955 GN=bub3 PE=1 SV=1	0.927	0.831	0.912058	0.960447	1.34729e+06	797163	602158	1.04371e+06	2.50817e+06	1.05708e+06	565460	1.54397e+06	1.00712e+06	561195	473980	574541	1.46716e+06	739421	565460	986279
Medium	0.026	X1WCS2	Myosin XVIIIAb OS=Danio rerio OX=7955 GN=myo18ab PE=1 SV=1	0.933	0.805	0.912058	0.960447	94066.6	65529.3	55803.5	79364.5	162865	63910.7	58492.1	100870	70316.4	46131.9	43924.9	43688.7	95268.3	44705.3	58492.1	64435.3
High	0.002	E7FDQ5	Cell cycle-associated protein 1a OS=Danio rerio OX=7955 GN=caprin1a PE=1 SV=1	0.924	0.734	0.912058	0.960447	452441	277045	247874	490960	556777	360249	133106	484810	338207	195037	195111	270265	325687	251992	133106	309693
High	0.002	F1Q953	Nucleoporin 155 OS=Danio rerio OX=7955 GN=nup155 PE=1 SV=1	1.453	0.728	0.912058	0.960447	102138	65826.5	176673	168499	223806	162842	24860.1	135253	76349.6	46341.2	139066	92755.4	130916	113908	24860.1	86398.3
High	0.004	Q7ZUX5	RNA 3'-terminal phosphate cyclase OS=Danio rerio OX=7955 GN=rtca PE=1 SV=1	1.444	0.509	0.912058	0.960447	46882.7	24315.7		90943	132938	64468.1	18305.5	71113.7	35045.6	17118		50062.4	77762.2	45095.2	18305.5	45426.9
High	0	Q7ZU48	Heterogeneous nuclear ribonucleoprotein A0,-like OS=Danio rerio OX=7955 GN=hnrnpa0l PE=1 SV=2	0.922	0.505	0.912058	0.960447	629831	356960	120232	216210	982916	379461	41331	380088	470810	251296	94639	119020	574958	265432	41331	242798
High	0	B8JLQ0	LYR motif-containing protein 4 OS=Danio rerio OX=7955 GN=lyrm4 PE=3 SV=1	1.444	0.502	0.912058	0.960447	1.1066e+06	734105	2.18656e+06	3.01471e+06	3.32559e+06	2.13422e+06	1.04428e+06	1.26438e+06	827205	516802	1.72112e+06	1.65954e+06	1.94531e+06	1.49288e+06	1.04428e+06	807677
Medium	0.015	A2BG80	Serine/threonine-protein phosphatase 2A 55 kDa regulatory subunit B OS=Danio rerio OX=7955 GN=ppp2r2ab PE=1 SV=3	0.927	0.463	0.912058	0.960447	56904.8		99473.3	164424	114085	88998.9	28109.8	52772.8	42537.3		78299	90512.5	66733.9	62254.4	28109.8	33710.9
Medium	0.041	E7FCM9	Zinc finger protein 593 OS=Danio rerio OX=7955 GN=znf593 PE=4 SV=1	1.443	0.856	0.913589	0.960447	313336	185077	268296	435129	441448	372277	193290	548779	234224	130293	211186	239530	258225	260406	193290	350556
High	0	Q6P5L8	Hydroxysteroid dehydrogenase-like protein 2 OS=Danio rerio OX=7955 GN=hsdl2 PE=2 SV=1	0.939	0.449	0.915525	0.960447	929749	549100	248205	709974	2.65895e+06	822222	86747.8	912127	695004	386561	195371	390828	1.55536e+06	575141	86747.8	582660
Medium	0.018	A0A2R8QKK6	RING-type E3 ubiquitin transferase OS=Danio rerio OX=7955 GN=rc3h1a PE=1 SV=1	1.419	0.89	0.923825	0.960447	68978.3	46762.9	48556.4	116506	110909	46697.8	92473.1	103658	51562.5	32920.6	38220.5	64134.3	64876.6	32664.9	92473.1	66216.3
High	0	E7F3A6	Uncharacterized protein OS=Danio rerio OX=7955 GN=tcerg1b PE=1 SV=3	1.425	0.853	0.923825	0.960447	693462	342620	613823	1.26152e+06	1.43331e+06	1.10102e+06	518385	999198	518375	241201	483162	694444	838418	770161	518385	638281
High	0	A6H8Q4	Crystallin, gamma M2d17 OS=Danio rerio OX=7955 GN=crygm2d17 PE=2 SV=1	0.947	0.823	0.923825	0.960447	644686	440375	466888	554160	1.36749e+06	557597	229972	685670	481914	310019	367504	305055	799914	390037	229972	438001
Medium	0.018	Q5XIZ6	Glycerol-3-phosphate dehydrogenase 1-like protein OS=Danio rerio OX=7955 GN=gpd1l PE=2 SV=1	1.421	0.776	0.923825	0.960447	68936.4	20822	98837.6	103610	151703	117782	12456.2	81422.7	51531.1	14658.5	77798.7	57035.3	88738.8	82388.3	12456.2	52012.2
High	0	Q6AZC1	Proteasome (Prosome, macropain) 26S subunit, ATPase, 5 OS=Danio rerio OX=7955 GN=psmc5 PE=1 SV=1	1.416	0.767	0.923825	0.960447	274397	130050	163582	417726	572792	388751	20775.2	383988	205117	91553.9	128761	229950	335055	271930	20775.2	245289
Medium	0.019	E7FC88	Unk-like zinc finger OS=Danio rerio OX=7955 GN=unkl PE=1 SV=2	0.949	0.728	0.923825	0.960447	124673	85078.2	63999.2	123158	204901	114489	46570.7	122312	93195.2	59894.1	50376.1	67796	119857	80084.8	46570.7	78132
Medium	0.021	Q6PFS7	Ubiquitin-like-conjugating enzyme ATG3 OS=Danio rerio OX=7955 GN=atg3 PE=2 SV=1	0.952	0.533	0.923825	0.960447	120060	74774.3	106112	229160	163288	107880	56540.1	121140	89746.9	52640.3	83524.6	126148	95515.7	75461.7	56540.1	77383
High	0.007	F1QS28	Heterogeneous nuclear ribonucleoprotein A0a OS=Danio rerio OX=7955 GN=hnrnpa0a PE=4 SV=1	1.416	0.521	0.923825	0.960447	114036	53914.9	34872.8	173773	399472	125363	17895.2	208118	85243.9	37955.5	27449.6	95659.1	233672	87690.8	17895.2	132944
High	0	Q6DC49	Tubulin alpha chain OS=Danio rerio OX=7955 GN=tuba8l3 PE=2 SV=1	1.422	0.448	0.923825	0.960447	171504	148491	219851	526159	506568	226888	31404.6	273726	128202	104536	173053	289641	296318	158707	31404.6	174854
High	0.001	A0A0G2KUJ0	Chaperonin-containing TCP1, subunit 2 (beta) OS=Danio rerio OX=7955 GN=cct2 PE=1 SV=1	1.417	0.448	0.923825	0.960447	122000	76381.9	131215	175016	400699	179652	24574.9	166337	91197.2	53772.1	103284	96342.9	234389	125666	24574.9	106255
High	0	E7FH04	Microtubule-associated protein (Fragment) OS=Danio rerio OX=7955 GN=mapta PE=4 SV=2	0.958	0.452	0.924756	0.960447	797473	532137	1.2925e+06	1.53489e+06	1.96962e+06	1.10089e+06	468228	976909	596125	374619	1.01737e+06	844926	1.15213e+06	770068	468228	624042
High	0	Q6TNP9	Tubulin alpha chain OS=Danio rerio OX=7955 GN=tuba5 PE=1 SV=1	1.407	0.43	0.928003	0.960447	576810	455393	974531	2.06848e+06	1.71555e+06	1.03149e+06	174604	898272	431176	320592	767089	1.13866e+06	1.00351e+06	721520	174604	573810
Medium	0.021	A0A2R8QHW5	Vacuolar protein sorting 13 homolog C OS=Danio rerio OX=7955 GN=vps13c PE=1 SV=1	1.395	0.896	0.930883	0.960447	103373	58260	62322	152894	166765	151674	22035.7	137046	77272.8	41014.4	49055.9	84165.5	97549.3	106096	22035.7	87544.1
High	0	F1QNT3	Tubulin folding cofactor E-like a OS=Danio rerio OX=7955 GN=tbcela PE=4 SV=1	0.965	0.787	0.930883	0.960447	279653	211150	232938	301891	466143	277352	183264	262558	209045	148647	183354	166185	272671	194006	183264	167720
High	0	A0A2R8RQC2	Far upstream element (FUSE)-binding protein 1 OS=Danio rerio OX=7955 GN=fubp1 PE=1 SV=1	0.97	0.778	0.930883	0.960447	5.30101e+06	3.3415e+06	3.27918e+06	5.41028e+06	8.3605e+06	4.97404e+06	1.93587e+06	5.52845e+06	3.96259e+06	2.35238e+06	2.58116e+06	2.97826e+06	4.89049e+06	3.47932e+06	1.93587e+06	3.53153e+06
High	0.01	F1QSB8	RNA helicase OS=Danio rerio OX=7955 GN=ddx42 PE=1 SV=1	1.396	0.775	0.930883	0.960447	164518	83512.5	128871	175774	297498	228947	53665.8	230428	122980	58791.9	101439	96760.3	174022	160148	53665.8	147195
High	0	A2BII1	Alanine aminotransferase 2-like (Fragment) OS=Danio rerio OX=7955 GN=gpt PE=1 SV=1	1.392	0.444	0.930883	0.960447	166697	83233.7	1.00795e+06	1.31924e+06	1.59254e+06	793422	400086	564012	124609	58595.7	793392	726217	931561	554995	400086	360287
High	0.002	B8A5G9	tRNA (guanine(37)-N1)-methyltransferase OS=Danio rerio OX=7955 GN=trmt5 PE=3 SV=1	1.379	0.525	0.949255	0.960447	69738.8	17986.2	45073.8	193790	120378	100849	23659.1	86649.2	52131	12662.1	35479.2	106678	70415.4	70543.2	23659.1	55350.9
High	0	I3ITI8	Abl-interactor 2b OS=Danio rerio OX=7955 GN=abi2b PE=1 SV=1	1.373	0.849	0.954849	0.960447	239194	140877	136789	402151	340942	341595	68007.9	315665	178802	99176.1	107671	221377	199434	238944	68007.9	201644
High	0	Q6P0V6	60S ribosomal protein L8 OS=Danio rerio OX=7955 GN=rpl8 PE=2 SV=3	1.37	0.743	0.954849	0.960447	336404	278771	454937	564484	592181	630556	129993	419648	251468	196252	358097	310738	346397	441071	129993	268068
High	0.002	A0A0R4II89	Catalase OS=Danio rerio OX=7955 GN=cat PE=1 SV=1	1.37	0.476	0.954849	0.960447	56927.4	26185.3	156338	230814	344895	127552	37304.5	164284	42554.2	18434.2	123059	127059	201747	89222.4	37304.5	104943
High	0.001	A0A0R4I9C3	RNA-binding motif protein 42 OS=Danio rerio OX=7955 GN=rbm42 PE=1 SV=1	1.364	0.862	0.959389	0.960447	95343.1	83094.3	69117	140809	195467	120835		122021	71270.6	58497.5	54404.5	77513	114339	84523.8		77946
High	0	Q6NW62	KH domain-containing, RNA-binding, signal transduction-associated 1b OS=Danio rerio OX=7955 GN=khdrbs1b PE=1 SV=1	1.303	0.898	0.968679	0.960447	1.53473e+06	731494	1.49931e+06	2.57976e+06	4.21995e+06	2.43932e+06	1.1143e+06	3.81355e+06	1.14724e+06	514964	1.18016e+06	1.42011e+06	2.46847e+06	1.7063e+06	1.1143e+06	2.43607e+06
High	0	A9LDD9	Glycine hydroxymethyltransferase OS=Danio rerio OX=7955 GN=shmt2 PE=1 SV=1	1.311	0.87	0.968679	0.960447	798363	465683	611218	944676	1.29491e+06	1.04395e+06	198032	845764	596790	327836	481112	520027	757461	730238	198032	540268
High	0	F1Q5Q3	SERPINE1 mRNA-binding protein 1a OS=Danio rerio OX=7955 GN=serbp1a PE=1 SV=1	1.012	0.863	0.968679	0.960447	1.13796e+07	1.84077e+07	1.35992e+07	2.29476e+07	4.54794e+07	1.91739e+07	6.92896e+06	2.12576e+07	8.50643e+06	1.29588e+07	1.07044e+07	1.26322e+07	2.66032e+07	1.34121e+07	6.92896e+06	1.35792e+07
High	0.009	Q6IQQ0	60S ribosomal protein L21 OS=Danio rerio OX=7955 GN=rpl21 PE=1 SV=1	1.323	0.828	0.968679	0.960447	124524	87524.6	94279.7	166709	258239	145289		131282	93084.1	61616.4	74211	91770.3	151057	101629		83861.8
High	0	E9QGU4	Chaperonin-containing TCP1, subunit 6A (zeta 1) OS=Danio rerio OX=7955 GN=cct6a PE=1 SV=1	1.331	0.812	0.968679	0.960447	590852	291813	296236	318254	1.3605e+06	759240	67439.2	592304	441672	205433	233178	175193	795829	531086	67439.2	378359
High	0	B0R0D7	Coronin-1C-A OS=Danio rerio OX=7955 GN=coro1ca PE=2 SV=1	1.037	0.812	0.968679	0.960447	249485	121791	290069	162646	774185	284422	47834.9	282546	186495	85739.8	228324	89533.8	452861	198952	47834.9	180488
Medium	0.026	Q7ZW38	Selenide, water dikinase 1 OS=Danio rerio OX=7955 GN=sephs1 PE=1 SV=2	1.035	0.807	0.968679	0.960447	363141	229788	137145	337276	852701	303103	110654	465669	271454	161768	107952	185664	498789	212019	110654	297466
High	0	Q6NYX8	PITH domain-containing protein 1 OS=Danio rerio OX=7955 GN=pithd1 PE=2 SV=1	1.35	0.794	0.968679	0.960447	573812	326745	362493	1.2052e+06	224805	221520	754105	178515	428935	230025	285331	663441	131500	154952	754105	114034
High	0	A0A0R4IDZ5	Lysine (K)-specific demethylase 3B OS=Danio rerio OX=7955 GN=kdm3b PE=1 SV=1	1.33	0.793	0.968679	0.960447	549876	463195	379324	1.05873e+06	998468	746738	300777	738854	411042	326085	298579	582810	584055	522341	300777	471974
High	0	O42248	Guanine nucleotide-binding protein subunit beta-2-like 1 OS=Danio rerio OX=7955 GN=gnb2l1 PE=2 SV=1	1.324	0.792	0.968679	0.960447	1.4178e+06	630152	690208	878852	3.53116e+06	1.39612e+06	296916	1.48182e+06	1.05983e+06	443620	543288	483792	2.06556e+06	976582	296916	946577
Medium	0.015	A0A0G2KJM7	LIM domain and actin-binding 1a OS=Danio rerio OX=7955 GN=lima1a PE=1 SV=2	1.033	0.785	0.968679	0.960447	201482	103117	38865.5	282357	267971	182893	30523.2	236989	150611	72593.4	30592.4	155432	156750	127933	30523.2	151387
High	0	Q803B0	60 kDa chaperonin OS=Danio rerio OX=7955 GN=hspd1 PE=1 SV=1	1.019	0.782	0.968679	0.960447	3.43205e+07	1.97376e+07	2.35316e+07	2.66807e+07	5.84406e+07	3.77833e+07	1.45386e+07	3.30857e+07	2.56552e+07	1.38951e+07	1.85226e+07	1.46872e+07	3.41849e+07	2.64293e+07	1.45386e+07	2.11349e+07
High	0	A0A286YAJ7	Abl-interactor 1b OS=Danio rerio OX=7955 GN=abi1b PE=1 SV=1	1.28	0.776	0.968679	0.960447	544926	98210	272488	1.10478e+06	716008	804283	179026	655874	407342	69138.8	214485	608164	418830	562593	179026	418967
Medium	0.039	F1QZ64	ATP-binding cassette, sub-family F (GCN20), member 2a OS=Danio rerio OX=7955 GN=abcf2a PE=1 SV=1	1.309	0.771	0.968679	0.960447	51107.3	34551.8	35685.4	56580.3	133053	55011.3	12433.9	102580	38203.6	24324.1	28089.3	31146.4	77829.4	38480.2	12433.9	65527.7
Medium	0.022	Q6YMR2	MCG1346-like protein OS=Danio rerio OX=7955 GN=phf5a PE=1 SV=1	1.038	0.77	0.968679	0.960447	530021	457523	244288	570814	799454	615754	121435	511351	396200	322091	192288	314222	467642	430718	121435	326647
Medium	0.042	Q6DRF0	Ring finger protein 113A OS=Danio rerio OX=7955 GN=rnf113a PE=1 SV=1	1.039	0.77	0.968679	0.960447	492590	495735	408194	666545	889682	703082	265092	513367	368219	348992	321304	366921	520421	491803	265092	327935
Medium	0.015	Q7ZUW5	RAB5A, member RAS oncogene family OS=Danio rerio OX=7955 GN=rab5aa PE=1 SV=1	1.352	0.759	0.968679	0.960447	68662.4	32906.5	84673.7	70719.6	167680	68243.3		60499.3	51326.3	23165.8	66649.7	38929.9	98084.9	47735.9		38646.5
High	0	Q8JH70	Fructose-bisphosphate aldolase C-B OS=Danio rerio OX=7955 GN=aldocb PE=2 SV=1	1.054	0.758	0.968679	0.960447	1.04349e+07	7.67464e+06	8.1721e+06	1.54402e+07	1.85369e+07	1.16417e+07	5.77804e+06	1.17994e+07	7.80028e+06	5.40286e+06	6.43255e+06	8.49954e+06	1.08432e+07	8.1433e+06	5.77804e+06	7.53738e+06
High	0	F1Q5P5	Mothers against decapentaplegic homolog OS=Danio rerio OX=7955 GN=smad2 PE=1 SV=1	1.055	0.758	0.968679	0.960447	716364	542814	621632	748676	1.26071e+06	760612	471018	750517	535494	382136	489309	412132	737455	532045	471018	479425
High	0.002	F1RCM3	Proteasome subunit beta OS=Danio rerio OX=7955 GN=psmb6 PE=1 SV=1	1.044	0.754	0.968679	0.960447	165834	122873	117338	227288	258051	152806	114115	194651	123964	86501	92360.9	125118	150947	106887	114115	124342
High	0	F1QGP8	High mobility group box 3a OS=Danio rerio OX=7955 GN=hmgb3a PE=1 SV=1	1.025	0.737	0.968679	0.960447	1.66579e+07	1.24764e+07	1.43758e+07	2.08322e+07	2.51557e+07	1.81064e+07	7.94188e+06	1.67424e+07	1.2452e+07	8.78328e+06	1.13157e+07	1.14677e+07	1.47148e+07	1.26653e+07	7.94188e+06	1.06949e+07
High	0	E7F8M1	Crystallin, beta B1,-like 1 OS=Danio rerio OX=7955 GN=crybb1l1 PE=1 SV=2	1.011	0.729	0.968679	0.960447	9.56851e+06	5.76151e+06	4.84608e+06	1.10703e+07	1.91253e+07	1.03229e+07	3.18106e+06	1.18255e+07	7.15262e+06	4.05604e+06	3.81452e+06	6.09399e+06	1.11873e+07	7.22081e+06	3.18106e+06	7.55405e+06
High	0	Q5XJ54	Glutaredoxin 3 OS=Danio rerio OX=7955 GN=glrx3 PE=2 SV=1	0.994	0.534	0.968679	0.960447	809114	847774	1.03307e+06	912003	1.86656e+06	996718	456791	823642	604826	596824	813168	502041	1091849	697200	456791	526137
High	0.01	Q7ZU42	Obg-like ATPase 1 OS=Danio rerio OX=7955 GN=ola1 PE=2 SV=1	1.331	0.53	0.968679	0.960447	212739	135647	207723	322856	571307	302668	67557.2	264853	159026	95494.2	163507	177727	334187	211715	67557.2	169186
High	0	Q1JPY6	Prefoldin subunit 2 OS=Danio rerio OX=7955 GN=pfdn2 PE=1 SV=1	1.037	0.528	0.968679	0.960447	248515	279770	215956	517982	581753	333347	108273	273314	185770	196955	169987	285140	340297	233175	108273	174591
High	0	E7F2R9	Protein tyrosine kinase 7a OS=Danio rerio OX=7955 GN=ptk7a PE=1 SV=1	1.333	0.521	0.968679	0.960447	190124	181931	252055	395169	601777	247927	131209	311798	142121	128078	198401	217533	352010	173424	131209	199174
High	0	X1WH50	Si:ch211-137a8.4 OS=Danio rerio OX=7955 GN=si:ch211-137a8.4 PE=1 SV=1	1.055	0.52	0.968679	0.960447	1.06767e+06	1.27103e+06	975847	2.47084e+06	2.53729e+06	1.20863e+06	686719	1.2407e+06	798104	894794	768124	1.36015e+06	1.48419e+06	845433	686719	792547
High	0.007	F1QY25	Zgc:162509 OS=Danio rerio OX=7955 GN=zgc:162509 PE=1 SV=1	1.307	0.511	0.968679	0.960447	75432.7	36494.6		106054	172384	103583	45405.2	74939.9	56387.3	25691.8		58380.9	100836	72455.6	45405.2	47871.1
High	0	A8WGC6	ATP synthase subunit beta OS=Danio rerio OX=7955 GN=atp5f1b PE=1 SV=1	1.286	0.502	0.968679	0.960447	398533	310042	113857	905349	1.25686e+06	485056	40914.8	531107	297910	218266	89621.1	498378	735199	339295	40914.8	339268
High	0	F1QUN8	Actin alpha 1, skeletal muscle a OS=Danio rerio OX=7955 GN=acta1a PE=3 SV=1	1.323	0.498	0.968679	0.960447	889446	517789	1.05748e+06	1.35557e+06	2.57709e+06	1.61292e+06	306131	1.63165e+06	664876	364518	832384	746218	1.50747e+06	1.12823e+06	306131	1.04229e+06
Medium	0.032	B8A5K9	Structural maintenance of chromosomes protein OS=Danio rerio OX=7955 GN=smc2 PE=1 SV=1	1.029	0.493	0.968679	0.960447	215728	165701	145026	197818	453291	220387	37719.5	223584	161260	116652	114155	108895	265153	154160	37719.5	142824
Medium	0.041	Q6PC68	Vacuolar proton pump subunit B OS=Danio rerio OX=7955 GN=atp6v1ba PE=1 SV=1	1.313	0.492	0.968679	0.960447	137414	73962.1	265091	283175	415863	204463	76443.3	159280	102719	52068.6	208663	155883	243260	143021	76443.3	101747
High	0	Q6IQC6	26S proteasome non-ATPase regulatory subunit 4 OS=Danio rerio OX=7955 GN=psmd4a PE=1 SV=1	1.048	0.491	0.968679	0.960447	294096	203991	236464	425061	830923	344024	209702	394565	219842	143607	186129	233988	486050	240643	209702	252046
High	0	Q5RGI2	Nuclear pore complex protein OS=Danio rerio OX=7955 GN=nup107 PE=1 SV=1	1.049	0.483	0.968679	0.960447	153837	187651	202732	358451	420303	144474	73983.4	154061	114996	132104	159578	197320	245857	101059	73983.4	98413.2
High	0	F1QZA4	Isocitrate dehydrogenase [NAD] subunit, mitochondrial OS=Danio rerio OX=7955 GN=idh3g PE=1 SV=1	1.053	0.468	0.968679	0.960447	1.78343e+06	1.67185e+06	3.38452e+06	4.00737e+06	6.1615e+06	1.99394e+06	1.28695e+06	2.67383e+06	1.33315e+06	1.17697e+06	2.66408e+06	2.20599e+06	3.60418e+06	1.39475e+06	1.28695e+06	1.70802e+06
High	0	Q6PBM1	Glutaredoxin-related protein 5, mitochondrial OS=Danio rerio OX=7955 GN=glrx5 PE=2 SV=1	1.291	0.462	0.968679	0.960447	149010	91034.8	170126	218494	446100	205973	63469.2	179649	111388	64087.5	133912	120277	260947	144077	63469.2	114759
High	0	F1R6L6	Nucleolin OS=Danio rerio OX=7955 GN=ncl PE=1 SV=1	1.002	0.458	0.968679	0.960447	168704	145740	147687	364150	342889	157169	62033.3	193766	126109	102599	116250	200458	200574	109939	62033.3	123776
High	0	A0A0R4IUU4	Si:ch1073-205c8.3 OS=Danio rerio OX=7955 GN=si:ch1073-205c8.3 PE=1 SV=1	1.037	0.455	0.968679	0.960447	346100	224694	427025	263203	813316	348258	52689.8	370179	258716	158182	336126	144889	475750	243605	52689.8	236468
High	0	Q6TLG8	DNA-(apurinic or apyrimidinic site) lyase OS=Danio rerio OX=7955 GN=rps3 PE=1 SV=1	0.997	0.454	0.968679	0.960447	1.0675e+06	866434	1.09809e+06	1.84556e+06	2.54953e+06	805323	783975	1.06565e+06	797973	609961	864346	1.01595e+06	1.49135e+06	563320	783975	680730
High	0	Q7ZVK5	Pcbp2 protein OS=Danio rerio OX=7955 GN=pcbp2 PE=1 SV=1	1.023	0.451	0.968679	0.960447	560808	300831	466486	369059	1.30075e+06	582217	92939.5	503580	419214	211782	367188	203160	760878	407259	92939.5	321683
High	0	Q802C9	RNA helicase OS=Danio rerio OX=7955 GN=eif4a1a PE=1 SV=1	1.316	0.444	0.968679	0.960447	1.84802e+06	1.05732e+06	1.07804e+06	1.94651e+06	5.81612e+06	2.02611e+06	290498	2.46638e+06	1.38142e+06	744340	848565	1.07152e+06	3.40215e+06	1.41726e+06	290498	1.57551e+06
High	0	Q6PE34	Tubulin beta chain OS=Danio rerio OX=7955 GN=zgc:65894 PE=1 SV=1	1.328	0.441	0.968679	0.960447	149253	49343.3	101824	496426	365683	218733	8178.54	179686	111569	34737.1	80149.4	273273	213907	153003	8178.54	114782
High	0.01	A2BGL0	Polynucleotide adenylyltransferase OS=Danio rerio OX=7955 GN=papolg PE=1 SV=1	1.035	0.441	0.968679	0.960447	126051	276530	282002	596779	384329	263009	166374	142014	94225.1	194674	221974	328516	224814	183974	166374	90717.5
High	0	B3DJF3	3'-phosphoadenosine-5'-phosphosulfate synthase OS=Danio rerio OX=7955 GN=papss1 PE=1 SV=1	1.061	0.484	0.97033	0.960447	650291	472953	587293	1.20082e+06	1.82206e+06	668890	260368	785901	486103	332954	462280	661029	1.06582e+06	467886	260368	502028
High	0	Q6DRP3	SNW domain-containing protein 1 OS=Danio rerio OX=7955 GN=snw1 PE=1 SV=1	1.072	0.827	0.978513	0.960447	421025	328607	303385	589507	656446	592192	225577	434725	314723	231336	238805	324513	383989	414236	225577	277699
High	0	Q5BJ17	Elongation factor Tu OS=Danio rerio OX=7955 GN=tufm PE=1 SV=1	1.074	0.517	0.978513	0.960447	781685	523597	1.25214e+06	2.5528e+06	2.77413e+06	1.42892e+06	448562	1.41333e+06	584323	368607	985602	1.40527e+06	1.62273e+06	999522	448562	902823
High	0	A0A1L1QZA5	WD_REPEATS_REGION domain-containing protein OS=Danio rerio OX=7955 GN=si:cabz01066312.1 PE=4 SV=1	1.252	0.778	0.979639	0.960447	313116	273201	272581	450053	518968	350310	338342	396624	234059	192330	214558	247746	303571	245040	338342	253360
High	0.008	E9QCP2	Methionine adenosyltransferase 2 subunit beta OS=Danio rerio OX=7955 GN=mat2b PE=1 SV=1	1.085	0.826	0.984174	0.960447	601931	441426	531345	710144	866941	726886	294953	586490	449954	310760	418241	390921	507118	508454	294953	374646
High	0.001	Q6NYJ1	LIM and SH3 domain protein 1 OS=Danio rerio OX=7955 GN=lasp1 PE=1 SV=1	1.095	0.791	0.984174	0.960447	65882.8	69520.4	63994.5	89191.7	179907	59788.8		91854	49248.5	48941.6	50372.4	49098.4	105237	41822		58675.7
High	0	A0A2R8Q3R8	Aldehyde dehydrogenase 9 family, member A1a, tandem duplicate 2 OS=Danio rerio OX=7955 GN=aldh9a1a.2 PE=1 SV=1	1.1	0.782	0.984174	0.960447	188646	140445	195527	229058	269647	308943	90884.7	179121	141016	98872.1	153906	126092	157730	216105	90884.7	114421
Medium	0.039	B0R085	Zgc:103482 OS=Danio rerio OX=7955 GN=zgc:103482 PE=1 SV=1	1.1	0.77	0.984174	0.960447	77498.8	97579.7	77551.9	187343	155434	95670.1	75557	144310	57931.7	68695.1	61043.9	103129	90921.5	66920.9	75557	92184.2
High	0	Q6PFV1	cAMP-regulated phosphoprotein 19a OS=Danio rerio OX=7955 GN=arpp19a PE=2 SV=1	1.228	0.766	0.984174	0.960447	245562	948973	1.04294e+06	391003	666098	331110	672292	1.4e+06	183562	668067	820939	215240	389635	231610	672292	894312
High	0	F1QSU4	PDZ and LIM domain 5b OS=Danio rerio OX=7955 GN=pdlim5b PE=1 SV=1	1.229	0.766	0.984174	0.960447	414527	328749	386288	611405	633303	468182	168776	554277	309866	231436	304061	336567	370452	327492	168776	354068
High	0	Q5U3S7	Nitric oxide synthase-interacting protein OS=Danio rerio OX=7955 GN=nosip PE=2 SV=1	1.236	0.728	0.984174	0.960447	1.7288e+06	1.31621e+06	969358	3.58526e+06	2.9096e+06	2.28581e+06	1.08969e+06	2.06704e+06	1.29231e+06	926598	763017	1.97362e+06	1.70197e+06	1.59891e+06	1.08969e+06	1.32041e+06
High	0	A9JRE2	Methylthioribose-1-phosphate isomerase OS=Danio rerio OX=7955 GN=mri1 PE=2 SV=1	1.097	0.532	0.984174	0.960447	281972	231248	294494	280129	707893	333035	149000	287164	210779	162796	231807	154206	414083	232957	149000	183438
High	0	Q6NYB4	Putative nucleotidyltransferase MAB21L1 OS=Danio rerio OX=7955 GN=mab21l1 PE=2 SV=1	1.105	0.757	0.987084	0.960447	829695	18938	561639	1.37362e+06	1.25627e+06	981482	631272	942117	620211	13332.1	442086	756153	734858	686543	631272	601818
High	0.008	A0A2R8QDN1	Disco-interacting protein 2 homolog B-A OS=Danio rerio OX=7955 GN=dip2ba PE=1 SV=1	1.104	0.519	0.987084	0.960447	187134	162503	292027	314050	464381	192477	151475	231721	139886	114401	229865	172879	271640	134637	151475	148022
Medium	0.025	Q7ZVX9	Thioredoxin domain-containing 9 OS=Danio rerio OX=7955 GN=txndc9 PE=1 SV=1	1.214	0.736	0.990512	0.960447	72615.6	60730.6	41593.6	109592	163249	97709		66546.1	54281.4	42753.7	32739.9	60328.4	95492.4	68347		42509.2
High	0	F1QB54	Polyadenylate-binding protein 1A OS=Danio rerio OX=7955 GN=pabpc1a PE=1 SV=1	1.181	0.817	0.991219	0.960447	2.37469e+06	1.69124e+06	1.92971e+06	3.2586e+06	4.37043e+06	3.57714e+06	1.25679e+06	3.01389e+06	1.77512e+06	1.19061e+06	1.51894e+06	1.7938e+06	2.55649e+06	2.50219e+06	1.25679e+06	1.92525e+06
High	0	A0A286YAP4	Heat shock protein 90, beta (grp94), member 1 OS=Danio rerio OX=7955 GN=hsp90b1 PE=1 SV=2	1.152	0.803	0.991219	0.960447	153438	49758.9	34192.8	107373	294877	71524.9	45920.6	236645	114698	35029.8	26914.4	59106.9	172489	50031.4	45920.6	151167
High	0.01	E7F429	Si:dkeyp-121d4.3 OS=Danio rerio OX=7955 GN=si:dkeyp-121d4.3 PE=1 SV=1	1.203	0.79	0.991219	0.960447	127080	82308.9	111408	174334	168769	171779	88055.2	128221	94994.3	57944.6	87693.4	95967.7	98721.5	120158	88055.2	81906.5
High	0	A0A0R4ISK8	KH domain-containing, RNA-binding, signal transduction-associated 1a OS=Danio rerio OX=7955 GN=khdrbs1a PE=1 SV=1	1.188	0.785	0.991219	0.960447	1.15745e+06	709369	1.74819e+06	2.98559e+06	5.16318e+06	3.28916e+06	1.30582e+06	4.08541e+06	865216	499388	1.37607e+06	1.64351e+06	3.02021e+06	2.30076e+06	1.30582e+06	2.60973e+06
High	0	Q803Q7	Fructose-bisphosphate aldolase OS=Danio rerio OX=7955 GN=aldoaa PE=1 SV=1	1.123	0.782	0.991219	0.960447	1.17751e+07	7.0654e+06	9.60523e+06	1.64667e+07	1.98501e+07	1.37927e+07	5.77214e+06	1.37023e+07	8.80208e+06	4.97397e+06	7.56062e+06	9.06459e+06	1.16113e+07	9.64796e+06	5.77214e+06	8.75296e+06
High	0	A0A2R8Q3F0	Eukaryotic translation initiation factor 4Bb OS=Danio rerio OX=7955 GN=eif4bb PE=1 SV=1	1.132	0.759	0.991219	0.960447	2.54099e+06	1.80408e+06	1.74371e+06	3.7849e+06	4.28444e+06	3.1796e+06	1.21646e+06	2.76949e+06	1.89944e+06	1.27005e+06	1.37254e+06	2.08352e+06	2.50619e+06	2.22411e+06	1.21646e+06	1.76913e+06
High	0.001	F1QZ09	ATP-citrate synthase OS=Danio rerio OX=7955 GN=aclya PE=1 SV=1	1.125	0.753	0.991219	0.960447	70768.7	51958.4	91209.7	96158.4	113398	87467.7	27661.4	72408.7	52900.8	36578.1	71794.4	52933.4	66332.2	61183.3	27661.4	46254.2
High	0.007	F1QE09	Sperm-associated antigen 7 homolog OS=Danio rerio OX=7955 GN=spag7 PE=1 SV=1	1.155	0.746	0.991219	0.960447	250137	203889	301593	349666	465048	260748	120412	385563	186982	143535	237394	192484	272030	182392	120412	246295
Medium	0.015	F1QI32	Tryptophanyl-tRNA synthetase 1 OS=Danio rerio OX=7955 GN=wars1 PE=1 SV=2	1.201	0.743	0.991219	0.960447	634545	340809	344522	794597	1.26102e+06	748806	255942	775078	474333	239926	271186	437411	737633	523787	255942	495114
High	0	Q6DGY4	Crystallin, beta A1b OS=Danio rerio OX=7955 GN=cryba1b PE=1 SV=1	1.177	0.728	0.991219	0.960447	5.49578e+06	3.79292e+06	5.12055e+06	7.8506e+06	1.03994e+07	6.63774e+06	2.09256e+06	5.94099e+06	4.10819e+06	2.67017e+06	4.03057e+06	4.32161e+06	6.08317e+06	4.64308e+06	2.09256e+06	3.79506e+06
High	0	Q1LYQ9	Cysteine desulfurase, mitochondrial OS=Danio rerio OX=7955 GN=nfs1 PE=1 SV=1	1.169	0.534	0.991219	0.960447	407110	306352	705094	1.12825e+06	1.00998e+06	577045	283526	537276	304322	215669	555005	621080	590792	403641	283526	343208
High	0	B8JLW8	Glutamine amidotransferase OS=Danio rerio OX=7955 GN=gmps PE=1 SV=1	1.189	0.53	0.991219	0.960447	408476	289294	369277	936922	859499	474575	153040	482995	305343	203660	290672	515758	502765	331964	153040	308534
High	0	A0A0R4IZC4	Charged multivesicular body protein 1a OS=Danio rerio OX=7955 GN=chmp1a PE=3 SV=2	1.188	0.527	0.991219	0.960447	160299	56069.3	274620	391912	227051	231262	71343.5	190140	119826	39472.2	216163	215740	132814	161767	71343.5	121460
High	0.001	A0A0R4IS83	Periostin, osteoblast-specific factor b OS=Danio rerio OX=7955 GN=postnb PE=1 SV=1	1.136	0.507	0.991219	0.960447	175513	91179.3	276348	559181	334886	213851	199461	156106	131199	64189.3	217523	307819	195892	149588	199461	99719.6
High	0	Q6DHE8	Rho-related GTP-binding protein RhoA-D OS=Danio rerio OX=7955 GN=rhoad PE=1 SV=1	1.179	0.48	0.991219	0.960447	151069	105165	226743	210011	406465	162752	53475	195050	112927	74034.8	178478	115607	237762	113844	53475	124596
High	0	Q7ZUS9	Electron transfer flavoprotein subunit alpha OS=Danio rerio OX=7955 GN=etfa PE=1 SV=1	1.141	0.479	0.991219	0.960447	832116	403998	1.1033e+06	2.04777e+06	1.92836e+06	853627	388155	958693	622021	284411	868449	1.12726e+06	1.128e+06	597109	388155	612406
High	0	F8W2D1	Peptidylprolyl isomerase OS=Danio rerio OX=7955 GN=fkbp4 PE=1 SV=1	1.204	0.475	0.991219	0.960447	551512	398851	804139	728752	1.63679e+06	566432	200069	777795	412264	280787	632967	401165	957440	396217	200069	496850
High	0.001	Q66HU4	Calpain-3 OS=Danio rerio OX=7955 GN=capn3a PE=1 SV=1	1.154	0.462	0.991219	0.960447	47000		22808.8	278822	117431	54252.7			35133.3		17953.6	153486	68691.3	37949.6
High	0	E7F0A1	Profilin OS=Danio rerio OX=7955 GN=pfn1 PE=1 SV=1	1.147	0.436	0.991219	0.960447	858349	629006	810058	860344	2.49979e+06	794860	324781	1.02593e+06	641631	442814	637626	473604	1.46226e+06	556001	324781	655359
High	0	Q90Z10	60S ribosomal protein L13 OS=Danio rerio OX=7955 GN=rpl13 PE=2 SV=3	1.161	0.733	1	0.960447	214484	159742	955306	1.2411e+06	1.29055e+06	1.02022e+06	119805	214874	160331	112457	751956	683203	754909	713639	119805	137260
High	0.009	F1QZ50	AHNAK nucleoprotein OS=Danio rerio OX=7955 GN=ahnak PE=1 SV=2	1.162	0.504	1	0.960447	114466	83482.3	74462.9	295318	228078	125112	37529.1	141313	85565.3	58770.6	58612.4	162567	133414	87515.4	37529.1	90269.5
High	0	A0A2R8Q5U1	Protein quaking-B OS=Danio rerio OX=7955 GN=qkib PE=4 SV=1	0.767	0.726	0.597141	0.964039	177849	103167	169970	232763	282438	183855	42886.9	156320	132945	72628.3	133789	128132	165213	128606	42886.9	99856.4
High	0	B8A518	Tubulin alpha chain OS=Danio rerio OX=7955 GN=tuba1c PE=3 SV=1	1.902	0.535	0.453917	0.965509	1.2362e+06	604309	1.83736e+06	3.99777e+06	3.66016e+06	2.47561e+06	137919	1.91308e+06	924082	425427	1.44626e+06	2.2007e+06	2.14101e+06	1.73168e+06	137919	1.22206e+06
High	0	E7F208	Protein FMC1 homolog OS=Danio rerio OX=7955 GN=si:ch1073-314i13.4 PE=1 SV=1	1.561	0.723	0.822672	0.971353	52291.3		34536.5	134884	121939	92776.6		71857.2	39088.7		27184.9	74251	71328.4	64896.9		45901.8
High	0	F1R4I1	DNA-directed RNA polymerase subunit OS=Danio rerio OX=7955 GN=polr1h PE=1 SV=1	0.873	0.539	0.835908	0.972483	98378.3	112751	76864.5	76354.1	211494	112675	41145.5	91988.5	73539.4	79375.2	60502.9	42031.5	123714	78815.9	41145.5	58761.6
High	0	Q6P3J5	Eukaryotic translation elongation factor 2 OS=Danio rerio OX=7955 GN=eef2b PE=1 SV=1	1.445	0.721	0.912058	0.972483	2.7573e+07	1.74497e+07	3.01141e+07	4.98815e+07	6.02131e+07	4.43565e+07	1.24514e+07	4.56955e+07	2.06113e+07	1.22844e+07	2.37039e+07	2.74589e+07	3.52217e+07	3.10272e+07	1.24514e+07	2.919e+07
High	0	A0A0R4IAS2	Periplakin OS=Danio rerio OX=7955 GN=ppl PE=1 SV=1	1.06	0.539	0.97033	0.972483	629131	493249	436953	912555	1.4536e+06	710188	317245	694054	470286	347242	343941	502345	850284	496774	317245	443356
High	0	A0A2R8Q8T5	TAR DNA-binding protein 43 OS=Danio rerio OX=7955 GN=tardbpb PE=1 SV=1	1.242	0.539	0.984174	0.972483	372810	341416	254725	650193	968517	462225	127970	483511	278682	240353	200503	357920	566535	323324	127970	308863
High	0	Q1L8L9	Adenylate kinase 2, mitochondrial OS=Danio rerio OX=7955 GN=ak2 PE=2 SV=1	1.231	0.538	0.984174	0.972483	413944	352886	410109	431779	957133	514742	143545	504064	309430	248428	322812	237687	559876	360060	143545	321992
High	0	B8JM56	DnaJ heat shock protein family (Hsp40) member B1b OS=Danio rerio OX=7955 GN=dnajb1b PE=1 SV=1	0.428	0.54	0.0177637	0.97268	401329	636085	263171	325049	667549	216252	122743	360746	300000	447797	207151	178934	390484	151268	122743	230442
High	0	A0A2R8QPR3	Deoxyuridine 5'-triphosphate nucleotidohydrolase OS=Danio rerio OX=7955 GN=dut PE=1 SV=1	2.08	0.72	0.320088	0.97268	1.16016e+06	392114	960530	4.00619e+06	2.56162e+06	2.8917e+06	733238	1.86107e+06	867241	276044	756068	2.20534e+06	1.49842e+06	2.02273e+06	733238	1.18884e+06
High	0	F1QK71	DNA helicase OS=Danio rerio OX=7955 GN=mcm5 PE=1 SV=1	1.983	0.719	0.37862	0.97268	536197	379096	1.06454e+06	1.67852e+06	1.74201e+06	1.33158e+06	397451	1.03349e+06	400817	266879	837937	923993	1.01899e+06	931436	397451	660189
High	0	F1R9N6	Si:ch211-113a14.12 OS=Danio rerio OX=7955 GN=si:ch211-113a14.12 PE=3 SV=1	1.012	0.718	0.968679	0.97268	1.50013e+06	1.03311e+06	1.36649e+06	2.90331e+06	1.66721e+06	1.24396e+06	75838.2	954114	1.12138e+06	727301	1.07562e+06	1.59822e+06	975234	870144	75838.2	609481
Medium	0.021	F1QMW2	X-linked inhibitor of apoptosis OS=Danio rerio OX=7955 GN=xiap PE=3 SV=2	1.301	0.541	0.968679	0.97268	44539.9	36573.2	51352.3	154943	96998.9	52495.7	40166.9	77434.9	33294.4	25747.1	40421.2	85293.1	56739.6	36720.5	40166.9	49464.8
High	0.009	A7MCR1	Cytochrome b-c1 complex subunit Rieske, mitochondrial OS=Danio rerio OX=7955 GN=uqcrfs1 PE=1 SV=1	1.265	0.541	0.971082	0.97268	403820	282692	468290	541260	1.19723e+06	427545	189336	648118	301862	199012	368608	297954	700322	299066	189336	414013
Medium	0.043	Q4VBI5	NADH dehydrogenase [ubiquinone] 1 alpha subcomplex subunit 2 OS=Danio rerio OX=7955 GN=ndufa2 PE=1 SV=1	1.244	0.54	0.984174	0.97268	105011	78500.5	97243.5	201161	273678	121683	52501.6	140304	78497.9	55263.5	76543.9	110736	160089	85117	52501.6	89625.2
High	0	Q5RIC5	DNA helicase OS=Danio rerio OX=7955 GN=mcm3 PE=1 SV=1	1.573	0.542	0.803557	0.97328	1.53125e+06	1.2991e+06	2.94523e+06	5.97652e+06	4.61774e+06	3.09036e+06	1.51714e+06	2.78032e+06	1.14463e+06	914550	2.3183e+06	3.28997e+06	2.70115e+06	2.16169e+06	1.51714e+06	1.77605e+06
High	0	O57521	Heat shock protein HSP 90-beta OS=Danio rerio OX=7955 GN=hsp90ab1 PE=1 SV=2	2.207	0.715	0.232367	0.974926	81566.8	34062.1	96453.6	316021	321303	217166		115635	60972.6	23979.4	75922.1	173963	187946	151907		73866.9
High	0	Q9YH60	Glycogen synthase kinase-3 beta OS=Danio rerio OX=7955 GN=gsk3ba PE=1 SV=1	1.289	0.543	0.968679	0.974926	739858	180613	740981	1.18413e+06	1.60302e+06	905015	304705	775835	553057	127150	583253	651844	937688	633055	304705	495598
High	0	A0A0R4ILY0	NOVA alternative-splicing regulator 2 OS=Danio rerio OX=7955 GN=nova2 PE=1 SV=1	1.075	0.543	0.978513	0.974926	1.13873e+06	735711	1.15871e+06	2.76275e+06	2.74747e+06	2.00706e+06	776080	917801	851218	517933	912062	1.52084e+06	1.60714e+06	1.40393e+06	776080	586285
High	0.001	Q6DGJ6	Peroxiredoxin-1 OS=Danio rerio OX=7955 GN=prdx2 PE=1 SV=1	1.243	0.543	0.984174	0.974926	539587	374648	407944	1.34019e+06	1.10388e+06	771572	259180	611810	403351	263748	321108	737750	645714	539711	259180	390820
High	0	Q6PC53	Peptidyl-prolyl cis-trans isomerase OS=Danio rerio OX=7955 GN=ppiab PE=1 SV=1	0.881	0.544	0.854224	0.976162	1.67295e+06	1.04526e+06	519006	1.02655e+06	4.08709e+06	1.35853e+06	189599	1.43281e+06	1.25056e+06	735855	408528	565099	2.39075e+06	950285	189599	915270
High	0.001	Q7ZUG6	60S ribosomal protein L30 OS=Danio rerio OX=7955 GN=rpl30 PE=1 SV=1	100	0.699	1.21569e-16	0.976887			404069	725157	1.02901e+06	507041	406008	580741			318057	399186	601919	354673	406008	370973
Medium	0.043	A2CG95	Medium-chain specific acyl-CoA dehydrogenase, mitochondrial OS=Danio rerio OX=7955 GN=acadm PE=1 SV=1	100	0.558	1.21569e-16	0.976887			37751.8	97880.4	149560	67476.9		33807.8			29715.8	53881.4	87485.2	47199.8		21596.2
High	0	Q6PBT1	40S ribosomal protein S27 OS=Danio rerio OX=7955 GN=rps27.2 PE=1 SV=1	100	0.557	1.21569e-16	0.976887			225260	643219	678031	358536	92692	592798			177310	354080	396615	250794	92692	378675
High	0	F1R3D3	Glyceraldehyde-3-phosphate dehydrogenase OS=Danio rerio OX=7955 GN=gapdhs PE=1 SV=1	0.368	0.71	0.00379704	0.976887	65451.8		29407.7	33911.3	194120	24607.6		23589.2	48926.4		23147.9	18667.6	113551	17212.9		15068.6
High	0	Q6TH14	2-phospho-D-glycerate hydro-lyase OS=Danio rerio OX=7955 GN=eno3 PE=1 SV=1	0.547	0.693	0.129019	0.976887	6.43128e+06	8.52089e+06	3.20849e+06	4.67209e+06	1.6794e+07	4.97974e+06	2.4734e+06	6.38382e+06	4.80749e+06	5.99862e+06	2.52552e+06	2.5719e+06	9.82366e+06	3.48331e+06	2.4734e+06	4.07794e+06
High	0.001	F1QJC3	HBS1-like protein OS=Danio rerio OX=7955 GN=hbs1l PE=1 SV=2	0.584	0.56	0.186924	0.976887	100684	142408	81613.2	128579	196508	78912.2	45663.5	87557.2	75263.1	100254	64240.7	70780.6	114947	55198.8	45663.5	55930.9
High	0	F1Q6Z7	Serine/threonine-protein phosphatase OS=Danio rerio OX=7955 GN=ppp2cab PE=1 SV=1	2.171	0.699	0.251752	0.976887	667566	411870	397583	1.80225e+06	2.20943e+06	1.35761e+06	107549	1.42749e+06	499017	289952	312952	992106	1.29241e+06	949646	107549	911870
High	0	Q9PU58	Protein NipSnap homolog 2 OS=Danio rerio OX=7955 GN=nipsnap2 PE=2 SV=2	0.664	0.559	0.351998	0.976887	951144	943388	789225	1.15003e+06	2.27101e+06	648729	521299	689356	710997	664135	621227	633072	1.32843e+06	453783	521299	440355
High	0	Q1LYG5	Eukaryotic translation elongation factor 2a, tandem duplicate 1 OS=Danio rerio OX=7955 GN=eef2a.1 PE=1 SV=2	1.991	0.692	0.37772	0.976887	123644	78970.7	312994	341084	227291	236004	164002	177951	92426.2	55594.5	246369	187760	132954	165084	164002	113674
High	0	F1QFC0	75 kDa glucose-regulated protein OS=Danio rerio OX=7955 GN=hspa9 PE=1 SV=1	0.679	0.558	0.37772	0.976887	5.15287e+06	5.41332e+06	3.25189e+06	6.44725e+06	8.83597e+06	4.54503e+06	2.58819e+06	4.00838e+06	3.85186e+06	3.81092e+06	2.55968e+06	3.54909e+06	5.16861e+06	3.17923e+06	2.58819e+06	2.56052e+06
High	0	F1QWA6	Zinc finger, FYVE domain-containing 19 OS=Danio rerio OX=7955 GN=zfyve19 PE=4 SV=2	0.686	0.559	0.390069	0.976887	336691	336140	270300	406738	761645	228276	185947	331561	251682	236639	212763	223902	445525	159678	185947	211799
High	0	A0A2R8Q9M8	Ubiquitin carboxyl-terminal hydrolase OS=Danio rerio OX=7955 GN=usp10 PE=1 SV=1	1.925	0.711	0.434092	0.976887	127818	180049	308653	537201	411746	314762	213173	381828	95546.5	126753	242952	295719	240852	220175	213173	243909
Medium	0.042	A0A0R4INU1	RNA-binding motif protein 12 OS=Danio rerio OX=7955 GN=rbm12 PE=1 SV=1	0.721	0.56	0.480566	0.976887	51155.4		37237.4		116629		22238.8	61221.8	38239.5		29310.9		68222.4		22238.8	39108
Medium	0.023	A0A0R4IBD6	Decapping mRNA 1A OS=Danio rerio OX=7955 GN=dcp1a PE=1 SV=1	1.815	0.7	0.541772	0.976887	149999	94046.6	188484	829365	273251	246571	188567	191180	112127	66207.8	148362	456550	159838	172476	188567	122124
High	0	F1QTB5	Dolichyl-diphosphooligosaccharide--protein glycosyltransferase subunit 1 OS=Danio rerio OX=7955 GN=rpn1 PE=1 SV=1	1.809	0.699	0.541772	0.976887	120764	69737.3	42878.8	176197	587150	155224		178420	90273.1	49094.3	33751.5	96993.1	343454	108579		113973
High	0	B8JIS8	Glutathione transferase OS=Danio rerio OX=7955 GN=gstm.1 PE=1 SV=1	0.746	0.549	0.541772	0.976887	1.10472e+06	740999	804654	1.28312e+06	3.32607e+06	1.15362e+06	316448	1.08013e+06	825797	521656	633372	706332	1.94559e+06	806955	316448	689981
High	0.001	Q6DRD1	ATP synthase subunit O, mitochondrial OS=Danio rerio OX=7955 GN=atp5po PE=1 SV=1	0.761	0.546	0.577058	0.976887	678371	665078	356506	844683	1.47948e+06	511026	194520	595987	507094	468208	280619	464982	865424	357461	194520	380712
High	0.01	F1R3G8	Spermidine synthase OS=Danio rerio OX=7955 GN=srm PE=1 SV=1	0.774	0.558	0.606723	0.976887	222373	220309	119851	196031	380932	171329	46087.7	212585	166228	155095	94339.2	107912	222827	119844	46087.7	135798
High	0	Q6PHI8	Tkt protein OS=Danio rerio OX=7955 GN=tktb PE=1 SV=1	0.78	0.703	0.62495	0.976887	5.95992e+06	4.49026e+06	2.7004e+06	4.20178e+06	1.3198e+07	5.04508e+06	1.16023e+06	4.84217e+06	4.45515e+06	3.16109e+06	2.12558e+06	2.313e+06	7.72018e+06	3.52901e+06	1.16023e+06	3.09315e+06
High	0	A0A0A0MPG3	Crystallin, gamma N2 (Fragment) OS=Danio rerio OX=7955 GN=crygn2 PE=1 SV=1	0.845	0.549	0.769566	0.976887	3.22033e+07	2.24122e+07	7.79324e+06	2.44404e+07	6.19483e+07	2.15075e+07	3.06487e+06	3.10896e+07	2.40726e+07	1.57779e+07	6.13434e+06	1.3454e+07	3.62368e+07	1.50444e+07	3.06487e+06	1.98598e+07
High	0	A0A0R4IBT0	Branchpoint-bridging protein OS=Danio rerio OX=7955 GN=sf1 PE=1 SV=1	0.858	0.705	0.803557	0.976887	412095	331803	244723	334030	847152	309558	158993	432250	308048	233586	192630	183877	495543	216535	158993	276118
High	0	Q7ZZ04	Enoyl CoA hydratase, short chain, 1, mitochondrial OS=Danio rerio OX=7955 GN=echs1 PE=1 SV=1	0.891	0.712	0.869305	0.976887	823819	541393	538212	821618	1.14288e+06	747024	188234	694036	615819	381135	423646	452285	668530	522540	188234	443345
High	0	B0R1D0	26S proteasome AAA-ATPase subunit RPT3 OS=Danio rerio OX=7955 GN=psmc4 PE=1 SV=1	1.513	0.697	0.869632	0.976887	150050	82675.1	134026	231647	330403	223754	36519.5	230385	112165	58202.4	105496	127518	193270	156515	36519.5	147168
High	0	F1QJX3	WW domain-binding protein 2 OS=Danio rerio OX=7955 GN=wbp2 PE=4 SV=1	1.477	0.708	0.894809	0.976887	74658.8	159440	119218	278259	323797	213247	197088	121763	55808.8	112244	93840.5	153177	189406	149165	197088	77781.1
High	0.002	F1QFV2	Heterogeneous nuclear ribonucleoprotein A1b OS=Danio rerio OX=7955 GN=hnrnpa1b PE=1 SV=1	1.479	0.701	0.894809	0.976887	179236	140740	99598.7	393529	348942	228226	180316	279427	133982	99079.7	78397.7	216631	204114	159643	180316	178496
High	0	F1QDR0	Ubiquitin-associated protein 2a OS=Danio rerio OX=7955 GN=ubap2a PE=1 SV=1	1.422	0.71	0.923825	0.976887	900069	559806	704915	1.59775e+06	1.55902e+06	1.30857e+06	416445	1.33216e+06	672817	394098	554864	879534	911951	915336	416445	850975
High	0.004	F1Q932	Cortactin OS=Danio rerio OX=7955 GN=cttn PE=1 SV=3	0.953	0.55	0.923825	0.976887	458013	427690	283184	524103	801804	431866	134921	441386	342372	301089	222905	288509	469016	302089	134921	281954
High	0	F1QCT6	Phospholipase A2-activating protein OS=Danio rerio OX=7955 GN=plaa PE=1 SV=1	1.412	0.703	0.924756	0.976887	150779	729507	520524	758542	1.35757e+06	729550	345442	818405	112710	513565	409724	417564	794114	510317	345442	522791
High	0	A5PL98	Succinate dehydrogenase [ubiquinone] iron-sulfur subunit, mitochondrial OS=Danio rerio OX=7955 GN=sdhb PE=2 SV=1	1.382	0.696	0.944259	0.976887	301000	132215	269331	640983	600713	468170	64997.9	454935	225003	93078.2	212000	352849	351388	327483	64997.9	290609
High	0	F1QFK9	Cleavage stimulation factor 50 kDa subunit OS=Danio rerio OX=7955 GN=cstf1 PE=1 SV=1	0.986	0.707	0.955193	0.976887	327788	205900	202051	264037	661465	249245	72010.1	478267	245027	144952	159042	145348	386925	174346	72010.1	305513
Medium	0.024	O93548	Embryonic 1 beta-globin OS=Danio rerio OX=7955 GN=hbbe1.3 PE=1 SV=1	1.344	0.711	0.968679	0.976887	95703.5	88803.3	88047.1	98278.8	245057	123888	41371	174123	71540.1	62516.6	69305.1	54100.7	143347	86659.3	41371	111228
High	0	Q6DG11	Spliceosome-associated factor 1, recruiter of U4/U6.U5 tri-snRNP OS=Danio rerio OX=7955 GN=sart1 PE=1 SV=1	1.047	0.703	0.968679	0.976887	244200	200646	434611	1.16096e+06	699966	492119	358002	625185	182543	141253	342098	639086	409446	344235	358002	399364
Medium	0.026	F1QKC2	TGF-beta-activated kinase 1/MAP3K7-binding protein 1 OS=Danio rerio OX=7955 GN=tab1 PE=1 SV=3	1.287	0.703	0.968679	0.976887	199016	133842	158689	416982	330846	293117	123427	223659	148768	94223.1	124910	229541	193529	205034	123427	142872
High	0	F8W4M7	Aconitate hydratase, mitochondrial (Fragment) OS=Danio rerio OX=7955 GN=aco2 PE=1 SV=2	1.342	0.697	0.968679	0.976887	747908	521836	644013	1.20773e+06	2.05761e+06	1.21333e+06	742511	1.00205e+06	559074	367367	506926	664832	1.2036e+06	848721	742511	640102
Medium	0.029	A0A2R8Q5P5	Adducin 3 (gamma) a OS=Danio rerio OX=7955 GN=add3a PE=1 SV=1	1.284	0.692	0.968679	0.976887	143157	86999.4	118623	224876	207073	143240	71042.8	259732	107013	61246.7	93372.7	123790	121128	100196	71042.8	165915
High	0	E7F3T0	SHC-transforming protein 1 OS=Danio rerio OX=7955 GN=shc1 PE=4 SV=2	1.277	0.56	0.968679	0.976887	167490	140136	277720	500012	349047	370165	141240	195593	125201	98654.5	218603	275247	204176	258929	141240	124944
High	0	E7EY34	AKT1 substrate 1 (proline-rich) OS=Danio rerio OX=7955 GN=akt1s1 PE=1 SV=1	1.054	0.551	0.968679	0.976887	258381	75188.6	108820	317122	548373	303291	80105.1	281243	193144	52932	85656.5	174570	320771	212151	80105.1	179656
High	0	Q6P3L3	78 kDa glucose-regulated protein OS=Danio rerio OX=7955 GN=hspa5 PE=1 SV=1	0.996	0.548	0.968679	0.976887	1.26231e+06	648082	500228	2.04667e+06	1.81221e+06	1.44071e+06	152884	994947	943597	456243	393748	1.12666e+06	1.06005e+06	1.00777e+06	152884	635565
High	0.001	F1Q5F3	Lamin B1 OS=Danio rerio OX=7955 GN=lmnb1 PE=1 SV=1	1.267	0.545	0.97033	0.976887	81402.7	54438.7	55683.5	273995	173991	110168	30328.1	96627.8	60849.9	38324.3	43830.5	150829	101776	77062	30328.1	61725.1
High	0.002	Q6PC80	Ribosomal protein S5 OS=Danio rerio OX=7955 GN=rps5 PE=1 SV=1	1.068	0.7	0.971082	0.976887	159263	149845	153285	209875	333927	164948	85959.1	233591	119052	105489	120656	115533	195331	115381	85959.1	149216
High	0	Q7ZUG5	40S ribosomal protein S21 OS=Danio rerio OX=7955 GN=rps21 PE=3 SV=1	1.249	0.694	0.984174	0.976887	1.00536e+07	9.68396e+06	1.09663e+07	2.81954e+07	1.95933e+07	1.30119e+07	9.00059e+06	1.45858e+07	7.51523e+06	6.8174e+06	8.63198e+06	1.55211e+07	1.14611e+07	9.10175e+06	9.00059e+06	9.3173e+06
High	0	A0A0R4IYX8	Dihydropyrimidinase-like 4 OS=Danio rerio OX=7955 GN=dpysl4 PE=1 SV=2	1.214	0.702	0.990512	0.976887	2.04173e+06	1.49453e+06	1.77583e+06	4.57352e+06	4.88858e+06	3.5093e+06	990527	2.92704e+06	1.52623e+06	1.05213e+06	1.39782e+06	2517639	2.85958e+06	2.45474e+06	990527	1.86977e+06
High	0	F1R1P6	N-acetylneuraminic acid synthase a OS=Danio rerio OX=7955 GN=nansa PE=1 SV=2	1.199	0.708	0.991219	0.976887	457214	362722	299661	652356	834302	588297	87165.1	517635	341775	255353	235874	359110	488026	411511	87165.1	330662
High	0	Q6IQ59	Ubiquinol-cytochrome c reductase core protein 2b OS=Danio rerio OX=7955 GN=uqcrc2b PE=1 SV=1	1.13	0.705	0.991219	0.976887	878268	638474	327622	945316	2.71301e+06	606853	166336	871216	656521	449479	257883	520379	1.58698e+06	424491	166336	556526
High	0	E9QCS7	Hepatocyte growth factor-regulated tyrosine kinase substrate OS=Danio rerio OX=7955 GN=hgs PE=1 SV=2	1.139	0.703	0.991219	0.976887	346764	276040	285478	500857	553436	488374	191710	352308	259212	194329	224710	275713	323733	341615	191710	225052
High	0	Q52JI6	Beta A1-2-crystallin OS=Danio rerio OX=7955 GN=cryba1l1 PE=1 SV=1	1.132	0.692	0.991219	0.976887	2.55987e+07	1.28999e+07	1.63264e+07	3.10284e+07	3.30491e+07	2.41193e+07	7.39081e+06	2.16497e+07	1.91354e+07	9.08141e+06	1.28511e+07	1.70806e+07	1.93321e+07	1.68714e+07	7.39081e+06	1.38297e+07
High	0	Q6IQU2	Beta A2-crystallin OS=Danio rerio OX=7955 GN=cryba2a PE=1 SV=1	1.118	0.561	0.991219	0.976887	8.50606e+06	5.46266e+06	6.84062e+06	1.76676e+07	1.88617e+07	9.68759e+06	3.69183e+06	9.50163e+06	6.35843e+06	3.84566e+06	5.3845e+06	9.72569e+06	1.10332e+07	6.77643e+06	3.69183e+06	6.06957e+06
High	0	Q7T2P2	T-complex protein 1 subunit gamma OS=Danio rerio OX=7955 GN=cct3 PE=1 SV=1	1.122	0.561	0.991219	0.976887	890764	1.0385e+06	730536	1.86265e+06	2.75185e+06	1.44697e+06	260963	1.4014e+06	665862	731096	575031	1.02536e+06	1.6097e+06	1.01215e+06	260963	895207
Medium	0.026	F1RBE6	Tumor protein p53-binding protein, 1 OS=Danio rerio OX=7955 GN=tp53bp1 PE=1 SV=1	1.137	0.557	0.991219	0.976887	60630.1	58634.6	75083	207820	114306	91256	41787.6	67820.3	45322.1	41278.1	59100.5	114401	66863.3	63833.2	41787.6	43323.1
Medium	0.015	Q803M4	Ubiquitin-conjugating enzyme E2 A,-like OS=Danio rerio OX=7955 GN=ube2al PE=1 SV=1	1.198	0.55	0.991219	0.976887	120985	109890	167140	119770	274034	139388	58298.9	150806	90438.2	77361.7	131562	65931.4	160297	97501.1	58298.9	96333.8
High	0	A0A2R8Q7N4	60S ribosomal protein L12 OS=Danio rerio OX=7955 GN=rpl12 PE=1 SV=1	1.064	0.69	0.97033	0.978714	1.98266e+06	1.66959e+06	1.22519e+06	2.52106e+06	3.45163e+06	2.2968e+06	759295	2.03167e+06	1.48207e+06	1.17537e+06	964388	1.3878e+06	2.01904e+06	1.6066e+06	759295	1.29782e+06
High	0	F1QK93	26S proteasome non-ATPase regulatory subunit 1 OS=Danio rerio OX=7955 GN=psmd1 PE=1 SV=2	1.228	0.69	0.984174	0.978714	217074	215313	451521	783546	1.18354e+06	537120	313312	661503	162266	151578	355409	431328	692312	375713	313312	422563
Medium	0.015	F1QTF0	3-hydroxy-3-methylglutarate-CoA lyase OS=Danio rerio OX=7955 GN=hmgcl PE=1 SV=1	0.615	0.688	0.240159	0.984443	200405	157495	86785.3	158930	511510	154764	70406.2	109302	149806	110875	68311.8	87488	299208	108257	70406.2	69821.2
High	0	A0A0R4IMS3	60S ribosomal protein L24 OS=Danio rerio OX=7955 GN=rpl24 PE=1 SV=1	1.611	0.687	0.751858	0.984443	166253	159847	304508	382271	431623	370629	63261.7	262627	124277	112531	239689	210433	252478	259253	63261.7	167764
High	0	F1R2T4	BolA family member 1 OS=Danio rerio OX=7955 GN=bola1 PE=1 SV=2	1.5	0.688	0.887089	0.984443	578461	188404	398832	1.02489e+06	1.54495e+06	1.06351e+06	128223	707877	432410	132634	313935	564183	903723	743920	128223	452187
High	0	A0A0H2UKC6	E3 ubiquitin-protein ligase RING2 OS=Danio rerio OX=7955 GN=rnf2 PE=1 SV=1	1.077	0.686	0.979639	0.984443	330871	188374	149875	1.19725e+06	449729	586937	127023	420104	247332	132614	117972	659064	263070	410560	127023	268359
High	0	Q6P0B2	C19orf13-like protein OS=Danio rerio OX=7955 GN=lsm14ab PE=1 SV=1	1.081	0.566	0.984174	0.984443	363496	286936	438052	649940	681370	314290	326427	336275	271720	202000	344806	357780	398568	219844	326427	214810
High	0.001	Q1LUD8	CCR4-NOT transcription complex, subunit 3b OS=Danio rerio OX=7955 GN=cnot3b PE=1 SV=1	1.153	0.687	0.991219	0.984443	100172	77792	69853.3	180134	163303	118914	56470.5	112198	74880.6	54764.7	54984.1	99160.3	95524.2	83179.9	56470.5	71671.4
Medium	0.021	A0A2R8PXX5	Proline-rich coiled-coil 2A OS=Danio rerio OX=7955 GN=prrc2a PE=1 SV=1	1.153	0.687	0.991219	0.984443	157350	94539.8	115612	266732	265404	200554	79411.1	164009	117621	66555	91002.3	146831	155248	140287	79411.1	104768
High	0	Q9DGK4	Translationally-controlled tumor protein homolog OS=Danio rerio OX=7955 GN=tpt1 PE=2 SV=1	1.449	0.567	0.912058	0.984548	964118	514976	1.08454e+06	997714	2.66105e+06	1.31461e+06	165380	1.32877e+06	720695	362538	853682	549223	1.55659e+06	919566	165380	848810
Medium	0.031	A0A2R8Q6S0	Diacylglycerol kinase OS=Danio rerio OX=7955 GN=dgkaa PE=1 SV=1	1.389	0.685	0.933049	0.984548	41385.9	25277.8	68005.4	66427.4	89536.6	53865.3	7094.98	61335.8	30936.6	17795.3	53529.5	36567.1	52374.5	37678.6	7094.98	39180.9
Medium	0.026	F1QPT3	GDP-D-mannose dehydratase OS=Danio rerio OX=7955 GN=gmds PE=1 SV=1	1.519	0.568	0.869305	0.985354	132491	47908.6	105333	306242	322842	232970	21477.1	173826	99039.2	33727.2	82911.4	168581	188847	162962	21477.1	111039
High	0	F1RCA1	Ubiquitin-like modifier-activating enzyme 1 OS=Danio rerio OX=7955 GN=uba1 PE=1 SV=1	1.661	0.682	0.689677	0.985761	441777	257226	661479	783054	1.26479e+06	896669	130235	652163	330236	181084	520674	431057	739842	627216	130235	416597
High	0.009	Q6NX89	Eukaryotic translation initiation factor 5A OS=Danio rerio OX=7955 GN=eif5a PE=1 SV=1	1.471	0.683	0.901418	0.985761	275271	162302	251540	200118	695070	345442	50680.7	474520	205770	114259	197996	110161	406582	241635	50680.7	303120
High	0	Q6PBK3	40S ribosomal protein S28 OS=Danio rerio OX=7955 GN=rps28 PE=3 SV=1	1.179	0.569	0.991219	0.985761	6.65262e+06	8.63106e+06	6.03149e+06	1.11389e+07	1.59517e+07	7.40995e+06	2.61578e+06	8.71912e+06	4.97295e+06	6.07618e+06	4.7476e+06	6.13175e+06	9.33097e+06	5.18323e+06	2.61578e+06	5.56971e+06
Medium	0.029	E7EZD6	Ubiquitinyl hydrolase 1 OS=Danio rerio OX=7955 GN=usp4 PE=1 SV=1	1.958	0.681	0.400481	0.986524	33762.9	14893.1	45062	96852.2	67975	65976.7	29231	48874.1	25238.4	10484.6	35469.9	53315.4	39762.1	46150.5	29231	31220.4
High	0	Q5RG12	Heat shock protein 90, alpha (cytosolic), class A member 1, tandem duplicate 2 OS=Danio rerio OX=7955 GN=hsp90aa1.2 PE=1 SV=1	1.727	0.571	0.628097	0.987472	1.29636e+06	756257	2.62888e+06	2.89147e+06	3.95796e+06	2.31255e+06	306989	2.12869e+06	969051	532397	2.06929e+06	1.5917e+06	2.31522e+06	1.61762e+06	306989	1.35979e+06
High	0	Q6DGL9	60S ribosomal protein L38 OS=Danio rerio OX=7955 GN=rpl38 PE=1 SV=1	1.216	0.571	0.990512	0.987472	1.01451e+07	8.16221e+06	1.14979e+07	1.67986e+07	2.2446e+07	1.33203e+07	5171714	1.58683e+07	7.58364e+06	5.74611e+06	9.05043e+06	9.24731e+06	1.31298e+07	9.31748e+06	5171714	1.01366e+07
High	0.002	Q6TH07	Flotillin OS=Danio rerio OX=7955 GN=flot1b PE=1 SV=1	0.301	0.674	0.000341896	0.992008	176128	125701		62531	179777	89751.4	16864.9	96691.9	131659	88492.1		34422.2	105161	62780.8	16864.9	61766.1
High	0	F1QHT9	RNA helicase OS=Danio rerio OX=7955 GN=ddx19 PE=1 SV=1	3.022	0.669	0.0269038	0.992008	698768	706109	589344	945808	2.35601e+06	626141	542201	928090	522341	497093	463894	520650	1.37815e+06	437983	542201	592857
High	0	Q6P0T6	Zinc finger protein 207, b OS=Danio rerio OX=7955 GN=znf207b PE=2 SV=1	0.521	0.672	0.0974978	0.992008	1.80774e+06	1.97396e+06	662990	1.26188e+06	3.85702e+06	964573	590771	2.0276e+06	1.35131e+06	1.38965e+06	521863	694641	2.25617e+06	674715	590771	1.29522e+06
Medium	0.026	Q5XTN0	Crygmx protein OS=Danio rerio OX=7955 GN=crygmx PE=1 SV=1	0.596	0.578	0.20515	0.992008	268127	192177	257177	163721	657815	148582	110945	165099	200429	135290	202433	90125.3	384790	103932	110945	105464
Medium	0.029	Q7ZUQ1	Cell division control protein 42 homolog OS=Danio rerio OX=7955 GN=cdc42l PE=1 SV=1	1.913	0.577	0.444043	0.992008	50549.7	28861.4	115716		138793	71999.3		74162.8	37786.8	20318.2	91084.4		81186.9	50363.2		47374.7
High	0	Q6PH06	V-crk avian sarcoma virus CT10 oncogene homolog-like OS=Danio rerio OX=7955 GN=crkl PE=1 SV=1	1.865	0.671	0.488333	0.992008	1.92887e+06	1.39174e+06	5.41801e+06	6.55455e+06	4.23876e+06	3.84101e+06	2.35663e+06	3.05912e+06	1.44186e+06	979769	4.26471e+06	3.60816e+06	2.47947e+06	2.68677e+06	2.35663e+06	1.95415e+06
High	0	Q568Q7	Stathmin OS=Danio rerio OX=7955 GN=stmn1b PE=1 SV=1	1.751	0.581	0.602579	0.992008	550777	901834	1.44737e+06	1.8307e+06	3.082e+06	1.79208e+06	502399	1.39133e+06	411716	634882	1.13928e+06	1.00777e+06	1.80282e+06	1.25356e+06	502399	888773
High	0	Q6PH46	T-complex protein 1 subunit delta OS=Danio rerio OX=7955 GN=cct4 PE=1 SV=1	0.773	0.581	0.606723	0.992008	1.78343e+06	1.54441e+06	1.42858e+06	2.64201e+06	4.30482e+06	1.88318e+06	669306	1.94211e+06	1.33315e+06	1.08725e+06	1.12448e+06	1.45438e+06	2.51811e+06	1.31728e+06	669306	1.2406e+06
High	0.001	Q561Y1	26S proteasome non-ATPase regulatory subunit 4 OS=Danio rerio OX=7955 GN=psmd4b PE=1 SV=1	0.811	0.667	0.687539	0.992008	468188	297743	239608	436084	792922	302639	147003	529019	349978	209608	188604	240056	463821	211695	147003	337933
High	0	Q6IQH4	26S proteasome non-ATPase regulatory subunit 8 OS=Danio rerio OX=7955 GN=psmd8 PE=1 SV=1	0.867	0.677	0.830166	0.992008	585310	125432	194030	649547	971171	582335	107640	519404	437530	88302.7	152728	357564	568088	407341	107640	331791
High	0	A0A0R4IUA6	Dedicator of cytokinesis 1 OS=Danio rerio OX=7955 GN=dock1 PE=1 SV=2	1.512	0.67	0.870242	0.992008	80080.3	53971.6	68676.4	229206	148392	181175	37056.5	99380.9	59861.4	37995.5	54057.7	126174	86802.3	126731	37056.5	63483.8
High	0	E7FAQ8	Heterogeneous nuclear ribonucleoprotein A1a OS=Danio rerio OX=7955 GN=hnrnpa1a PE=1 SV=1	1.506	0.67	0.877079	0.992008	507739	296773	176846	1.11527e+06	828369	944667	173018	593526	379543	208925	139202	613933	484555	660791	173018	379140
High	0	A0A0R4ILC0	Polymerase (DNA-directed), delta-interacting protein 3 (Fragment) OS=Danio rerio OX=7955 GN=poldip3 PE=1 SV=1	1.49	0.678	0.890632	0.992008	243127	240109	475461	2.02092e+06	652154	349937	399213	466611	181741	169034	374252	1.11248e+06	381479	244780	399213	298068
High	0	E7F192	Drebrin 1 OS=Danio rerio OX=7955 GN=dbn1 PE=1 SV=1	0.932	0.581	0.912058	0.992008	376087	436172	633503	949213	1.53645e+06	727297	348356	702524	281131	307060	498653	522524	898750	508741	348356	448767
High	0	E9QI62	Filamin A, alpha (actin-binding protein 280) OS=Danio rerio OX=7955 GN=flna PE=3 SV=1	0.948	0.576	0.923825	0.992008	978800	334916	792380	1.87675e+06	2.47886e+06	1.58984e+06	494371	1.44141e+06	731670	235777	623711	1.03312e+06	1.45001e+06	1.11209e+06	494371	920763
High	0	A0A2R8Q5K7	Dihydropyrimidinase-like 5a OS=Danio rerio OX=7955 GN=dpysl5a PE=1 SV=1	1.411	0.677	0.924756	0.992008	2.9996e+06	5.01924e+06	6.15215e+06	1.37622e+07	1.20228e+07	9.13277e+06	3.79746e+06	7.81434e+06	2.24226e+06	3.53349e+06	4.84258e+06	7.57587e+06	7.03275e+06	6.38834e+06	3.79746e+06	4.99174e+06
High	0	F1QXP8	KH-type-splicing regulatory protein OS=Danio rerio OX=7955 GN=khsrp PE=1 SV=1	0.964	0.672	0.930883	0.992008	1.02703e+07	9.00418e+06	7.818e+06	1.45407e+07	3.04972e+07	1.35352e+07	5.58368e+06	1.37946e+07	7.67726e+06	6.33885e+06	6.15383e+06	8.00438e+06	1.78394e+07	9.4678e+06	5.58368e+06	8.81187e+06
High	0	Q7ZSY3	Brahma protein-like protein 1 OS=Danio rerio OX=7955 GN=smarca4a PE=1 SV=1	0.963	0.669	0.930883	0.992008	389505	327631	175035	508709	690671	289871	244228	400574	291161	230649	137776	280035	404009	202763	244228	255884
High	0	F1QTE3	Adducin 2 (beta) OS=Danio rerio OX=7955 GN=add2 PE=3 SV=3	1.294	0.668	0.968679	0.992008	135189	93930	148365	273256	272230	182582	108906	167655	101056	66125.7	116783	150422	159242	127716	108906	107097
Medium	0.015	B8A4D7	Ribosome-binding protein 1a OS=Danio rerio OX=7955 GN=rrbp1a PE=1 SV=1	1.057	0.582	0.968679	0.992008	77126.1	40395.9	60669.7	106936	146782	85478.5	34287.6	77710.7	57653.1	28438.3	47755.3	58866.2	85860.5	59791.9	34287.6	49641.1
High	0	A0A0R4IWL6	Pumilio RNA-binding family member 1 OS=Danio rerio OX=7955 GN=pum1 PE=1 SV=2	1.333	0.581	0.968679	0.992008	585522	552533	1.15183e+06	2.3228e+06	1.44667e+06	1.31719e+06	480005	803782	437688	388977	906651	1.27866e+06	846231	921367	480005	513450
High	0.001	Q6TEL1	Double-strand-break repair protein rad21 homolog A OS=Danio rerio OX=7955 GN=rad21a PE=1 SV=1	1.267	0.58	0.97033	0.992008	101536	54050		142288	220482	102818	23458.5	161061	75899.6	38050.7		78326.9	128971	71921	23458.5	102884
High	0	Q9DE44	Cyclin-dependent kinase 5 OS=Danio rerio OX=7955 GN=cdk5 PE=1 SV=1	1.255	0.573	0.978513	0.992008	465688	413086	426705	935345	978512	529181	309429	593187	348110	290808	335875	514890	572382	370160	309429	378923
High	0	F1QNE0	Nuclear autoantigenic sperm protein (histone-binding) OS=Danio rerio OX=7955 GN=nasp PE=1 SV=1	1.239	0.678	0.984174	0.992008	512889	265790	553602	865104	1.22859e+06	734208	275373	845213	383393	187113	435760	476224	718663	513576	275373	539916
High	0	F8W3H2	ATP synthase F1 subunit epsilon OS=Danio rerio OX=7955 GN=atp5f1e PE=1 SV=1	1.094	0.575	0.984174	0.992008	770169	742314	1.14816e+06	1.88872e+06	3.19336e+06	1.4237e+06	501607	1.84045e+06	575715	522581	903758	1.03971e+06	1.86796e+06	995874	501607	1.17566e+06
High	0.002	E9QI46	Coronin OS=Danio rerio OX=7955 GN=coro1cb PE=1 SV=1	1.207	0.673	0.991219	0.992008	211688	149399	109229	207352	496302	246557	73517.6	264941	158240	105175	85977.7	114144	290312	172466	73517.6	169243
High	0	A0A286Y8X9	Eukaryotic translation elongation factor 2b OS=Danio rerio OX=7955 GN=eef2b PE=3 SV=2	1.149	0.668	0.991219	0.992008	2.01151e+07	2.06877e+07	2.07138e+07	3.51197e+07	4.84209e+07	2.34463e+07	1.79129e+07	2.97583e+07	1.50364e+07	1.45639e+07	16304569	1.93327e+07	2.83239e+07	1.64006e+07	1.79129e+07	1.90094e+07
High	0.003	F1R543	Wu:fb30f12 OS=Danio rerio OX=7955 GN=wu:fb30f12 PE=1 SV=1	1.13	0.668	0.991219	0.992008	92663.5	58283	58597.1	194385	143367	79265	54698.6	129868	69267.6	41030.6	46123.9	107005	83863	55445.5	54698.6	82958.8
High	0	B0UYN4	Zgc:162944 OS=Danio rerio OX=7955 GN=zgc:162944 PE=1 SV=1	1.129	0.582	0.991219	0.992008	706407	201058	883616	1.63238e+06	1.837e+06	998042	257455	677775	528051	141543	695526	898594	1.07456e+06	698127	257455	432958
High	0	A0A2R8Q3C6	Wiskott-Aldrich syndrome protein family member OS=Danio rerio OX=7955 GN=zgc:109889 PE=3 SV=1	1.138	0.577	0.991219	0.992008	222335	192417	190305	483980	372895	280784	92276.5	265894	166199	135460	149796	266422	218125	196407	92276.5	169851
Medium	0.026	A0A2R8Q185	Eukaryotic translation initiation factor 4E-binding protein 1 OS=Danio rerio OX=7955 GN=eif4ebp1 PE=1 SV=1	100	0.642	1.21569e-16	0.993002			141587	398104	316829	255503	55871.3	212352			111448	219149	185329	178724	55871.3	135649
High	0.001	B3DK73	Poly(U)-specific endoribonuclease OS=Danio rerio OX=7955 GN=si:dkey-222f8.3 PE=1 SV=1	100	0.641	1.21569e-16	0.993002			235311	322417	245416	181694	25595.9	206732			185222	177485	143557	127094	25595.9	132059
Medium	0.039	Q6IQ97	RNA-binding protein 4.1 OS=Danio rerio OX=7955 GN=rbm4.1 PE=1 SV=1	100	0.586	1.21569e-16	0.993002			44713.4	85955.4	139811	50364.5	41861.7	79639.2			35195.5	47316.9	81782.5	35229.8	41861.7	50872.9
High	0	Q7ZTS4	Keratin, type I cytoskeletal 18 OS=Danio rerio OX=7955 GN=krt18 PE=1 SV=2	0.114	0.605	1.33028e-11	0.993002	876228	1.6416e+06	142014	191195	243022	166112	84047.8	115690	654995	1.15567e+06	111785	105250	142156	116195	84047.8	73901.9
High	0.007	I3ITF2	SR-related CTD-associated factor 1 OS=Danio rerio OX=7955 GN=scaf1 PE=4 SV=1	2.619	0.65	0.0924198	0.993002	23654		95284	286700	63283.9	91177.8	53759.6	61946.6	17681.7		75001.5	157823	37018	63778.5	53759.6	39571
High	0	Q802U9	3'-phosphoadenosine-5'-phosphosulfate synthase OS=Danio rerio OX=7955 GN=papss2b PE=1 SV=1	0.532	0.587	0.107455	0.993002	240299	270388	141055	227310	633914	133487	122231	294160	179627	190350	111030	125130	370809	93373.6	122231	187908
High	0	Q642H5	Protein phosphatase 2 (Formerly 2A), regulatory subunit A, beta isoform OS=Danio rerio OX=7955 GN=ppp2r1bb PE=1 SV=1	2.457	0.593	0.132534	0.993002	212100	105388	151133	936903	716298	651294	89644.4	417113	158548	74191.9	118962	515748	418999	455577	89644.4	266449
High	0.008	Q642H9	40S ribosomal protein S4, X isoform OS=Danio rerio OX=7955 GN=rps4x PE=2 SV=3	2.373	0.653	0.167659	0.993002	55419.9	44064.3	157290	179627	181332	158631	50227.2	117245	41427.3	31020.8	123808	98881.3	106070	110962	50227.2	74895.3
High	0	F1QCN0	Glutamine amidotransferase-like class 1 domain-containing protein 3A, mitochondrial OS=Danio rerio OX=7955 GN=gatd3a PE=3 SV=1	2.365	0.611	0.169601	0.993002	446042	311349	758964	1.07406e+06	1.15802e+06	806115	523336	622778	333424	219186	597408	591251	677384	563874	523336	397826
High	0.002	Q7T2F2	Non-specific serine/threonine protein kinase OS=Danio rerio OX=7955 GN=mapkapk2a PE=1 SV=1	2.131	0.64	0.282995	0.993002	92630.9	37879.1	139724	278619	157776	178082	89467.4	141249	69243.2	26666.5	109981	153375	92291.3	124567	89467.4	90229.1
High	0	Q9I9N0	Dap1b OS=Danio rerio OX=7955 GN=dap1b PE=1 SV=1	0.638	0.599	0.292907	0.993002	4.30262e+06	3.25543e+06	2.36378e+06	3.0791e+06	6.38677e+06	2.50177e+06	1870080	3.21527e+06	3.21628e+06	2.29179e+06	1.86062e+06	1.69499e+06	3.73595e+06	1.74998e+06	1870080	2.05389e+06
High	0	Q6NVI6	CCT-epsilon OS=Danio rerio OX=7955 GN=cct5 PE=1 SV=1	2	0.65	0.373009	0.993002	961589	561454	1.19354e+06	2.81934e+06	4.33214e+06	2.10151e+06	635404	1.9861e+06	718804	395257	939480	1.55199e+06	2.53409e+06	1.47e+06	635404	1.26871e+06
High	0.003	Q7ZUI3	Tetratricopeptide repeat domain 9C OS=Danio rerio OX=7955 GN=ttc9c PE=1 SV=1	1.982	0.593	0.37862	0.993002	70047.8	46136.4	141557	248994	170020	130550	81610.2	147613	52361.9	32479.6	111425	137066	99453.3	91319	81610.2	94293.8
High	0	Q503D8	Thioredoxin domain-containing protein 12 OS=Danio rerio OX=7955 GN=txndc12 PE=1 SV=1	1.879	0.596	0.474073	0.993002	695014	428086	1.08258e+06	2.61616e+06	1.16662e+06	1.52483e+06	483194	1.02331e+06	519535	301368	852139	1.44015e+06	682416	1.06661e+06	483194	653680
High	0	Q6YI49	Ubiquitin carboxyl-terminal hydrolase OS=Danio rerio OX=7955 GN=uchl1 PE=1 SV=1	0.726	0.616	0.493681	0.993002	1.51045e+07	1.01615e+07	1.19318e+07	1.22369e+07	3.16019e+07	1.35897e+07	2.48525e+06	1.31732e+07	1.12909e+07	7.15362e+06	9.39197e+06	6.73621e+06	1.84856e+07	9.50596e+06	2.48525e+06	8.41493e+06
High	0	Q4VBU2	Crystallin, gamma MX,-like 2 OS=Danio rerio OX=7955 GN=crygmxl2 PE=1 SV=1	0.729	0.634	0.499831	0.993002	2.90121e+06	1.82707e+06	878520	2.51723e+06	5.78356e+06	2.12594e+06	744434	3.09075e+06	2.16871e+06	1.28624e+06	691515	1.38569e+06	3.3831e+06	1.48709e+06	744434	1.97435e+06
High	0	A0A0G2KGL2	AIR synthase OS=Danio rerio OX=7955 GN=gart PE=1 SV=2	1.802	0.659	0.541772	0.993002	1.17579e+06	628612	2.04725e+06	2.72012e+06	3.39049e+06	2.34701e+06	545252	1.98813e+06	878921	442536	1.61146e+06	1.49737e+06	1.98327e+06	1.64173e+06	545252	1.27e+06
Medium	0.041	Q7T3H2	Insulinoma-associated protein 1b OS=Danio rerio OX=7955 GN=insm1b PE=2 SV=1	1.802	0.608	0.541772	0.993002	57116.4	41841.5	87804.3	203286	118539	90237.8	53377.3	117425	42695.5	29456	69113.9	111905	69339.3	63121	53377.3	75010.4
Medium	0.029	Q5PRD0	14-3-3 protein beta/alpha-A OS=Danio rerio OX=7955 GN=ywhaba PE=2 SV=2	0.748	0.602	0.541772	0.993002	207119		165231	272869	318853	192051	139497	154945	154825		130059	150209	186514	134339	139497	98977.4
Medium	0.022	Q5YKG4	G-protein alpha 12 OS=Danio rerio OX=7955 GN=gna12a PE=2 SV=1	1.786	0.662	0.563187	0.993002	229101	147472	286288	497851	638767	423121	43474.9	395515	171257	103819	225348	274058	373648	295972	43474.9	252652
High	0	A7E2K5	Crystallin, beta B1,-like 2 OS=Danio rerio OX=7955 GN=crybb1l2 PE=1 SV=1	0.769	0.606	0.600628	0.993002	1.52998e+06	1.15152e+06	433554	1.35585e+06	3.00007e+06	1.20658e+06	301022	1.45912e+06	1.14368e+06	810661	341266	746372	1.7549e+06	843995	301022	932077
High	0	E7F4R9	IDP OS=Danio rerio OX=7955 GN=idh2 PE=1 SV=2	1.706	0.592	0.648399	0.993002	929418	346653	727948	1.17931e+06	2.7151e+06	1.30671e+06	131988	918252	694756	244040	572994	649186	1.5882e+06	914042	131988	586572
High	0.001	Q801U3	Serine and arginine-rich-splicing factor 3a OS=Danio rerio OX=7955 GN=srsf3a PE=1 SV=1	1.649	0.604	0.706196	0.993002	264166	163090	296314	339334	728910	420973	72236.9	439546	197469	114814	233239	186797	426377	294469	72236.9	280778
High	0	Q4VBV1	Cytochrome b-c1 complex subunit 7 OS=Danio rerio OX=7955 GN=uqcrb PE=1 SV=1	0.821	0.615	0.710746	0.993002	4.5454e+06	3.58504e+06	2.10947e+06	3.39725e+06	1.42065e+07	3.62784e+06	1.14397e+06	5.80655e+06	3.39776e+06	2.52383e+06	1.66044e+06	1.87013e+06	8.3101e+06	2.53766e+06	1.14397e+06	3.70918e+06
High	0.001	A8KB74	Carbonic anhydrase OS=Danio rerio OX=7955 GN=ca5a PE=2 SV=1	0.829	0.597	0.736165	0.993002	120144	147779	158413	185073	209363	136849	63668.7	110522	89809.7	104035	124692	101880	122467	95725.1	63668.7	70600.5
High	0	E7F9D4	Microtubule-associated protein OS=Danio rerio OX=7955 GN=maptb PE=1 SV=2	1.554	0.614	0.830166	0.993002	242648	137924	481564	608041	597002	388026	154231	366631	181384	97097.3	379057	334715	349217	271423	154231	234201
Medium	0.026	Q6NYV1	Proteasome (Prosome, macropain) 26S subunit, non-ATPase, 3 OS=Danio rerio OX=7955 GN=psmd3 PE=1 SV=1	0.88	0.642	0.854224	0.993002	174899	143606	104595	219909	361388	139519	67115.4	245346	130740	101097	82330.9	121056	211394	97592.8	67115.4	156725
High	0.001	A5PMV7	Protein phosphatase 2, regulatory subunit A, beta a OS=Danio rerio OX=7955 GN=ppp2r1ba PE=1 SV=1	1.529	0.615	0.854224	0.993002	112969	14581.5	33302.9	440220	398469	257722	22300.8	206333	84446.6	10265.2	26213.9	242333	233085	180276	22300.8	131804
High	0	Q6PC90	40S ribosomal protein S12 OS=Danio rerio OX=7955 GN=rps12 PE=1 SV=1	0.883	0.6	0.854224	0.993002	835126	838145	500536	1.50105e+06	1.56697e+06	925562	434848	803865	624271	590046	393990	826302	916599	647427	434848	513503
High	0	A0A0R4IYD0	40S ribosomal protein S27 OS=Danio rerio OX=7955 GN=rps27l PE=1 SV=1	0.909	0.602	0.890632	0.993002	1.59718e+06	1.59728e+06	522388	2.14409e+06	2.6185e+06	1.32763e+06	183903	1.86472e+06	1193916	1.12447e+06	411190	1.18028e+06	1.5317e+06	928675	183903	1.19117e+06
High	0	A0A2R8QIA2	Protein lin-7 homolog OS=Danio rerio OX=7955 GN=lin7c PE=1 SV=1	1.448	0.666	0.912058	0.993002	951628	538538	1.23611e+06	3.9986e+06	2.37404e+06	2.39555e+06	1.17888e+06	1.48464e+06	711358	379125	972986	2.20115e+06	1.3887e+06	1.67568e+06	1.17888e+06	948378
High	0	F1QPJ6	Zgc:152830 OS=Danio rerio OX=7955 GN=zgc:152830 PE=1 SV=3	0.928	0.654	0.912058	0.993002	937433	540064	276219	551854	1.9385e+06	834878	99991.8	811658	700747	380199	217422	303786	1.13393e+06	583994	99991.8	518481
High	0	Q803F6	40S ribosomal protein SA OS=Danio rerio OX=7955 GN=rpsa PE=2 SV=1	1.45	0.635	0.912058	0.993002	669596	373106	551516	2.1199e+06	1.42759e+06	1.29037e+06	200573	1.235e+06	500535	262662	434118	1.16696e+06	835072	902609	200573	788912
High	0	F1QA42	Ataxin 2-like OS=Danio rerio OX=7955 GN=atxn2l PE=1 SV=1	1.444	0.633	0.912058	0.993002	265629	293986	185398	679052	548953	429964	114322	419346	198562	206963	145934	373806	321111	300758	114322	267875
High	0	B1NA68	Mitogen-activated protein kinase kinase 4A OS=Danio rerio OX=7955 GN=map2k4a PE=1 SV=1	0.927	0.614	0.912058	0.993002	358866	350874	340624	485731	838047	328825	208978	355648	268259	247012	268117	267386	490217	230012	208978	227186
High	0	F1R2V6	Microtubule-associated protein (Fragment) OS=Danio rerio OX=7955 GN=map2 PE=1 SV=1	1.439	0.648	0.915465	0.993002	560278	440009	657044	1.37687e+06	1.12338e+06	814303	476012	818535	418818	309762	517183	757941	657125	569602	476012	522875
High	0	A0A286Y8C1	Catenin (cadherin-associated protein), delta 1 OS=Danio rerio OX=7955 GN=ctnnd1 PE=1 SV=2	0.949	0.606	0.923825	0.993002	4.16202e+06	3.48573e+06	3.41768e+06	7.71963e+06	7.91334e+06	4.72912e+06	2.23914e+06	5.13173e+06	3.11118e+06	2.45391e+06	2.69018e+06	4.24951e+06	4.62892e+06	3.308e+06	2.23914e+06	3.27811e+06
High	0	A0A2R8QJ57	Si:ch1073-55a19.2 OS=Danio rerio OX=7955 GN=ranbp2 PE=1 SV=1	1.41	0.59	0.924756	0.993002	218008	193540	179711	591386	428932	343494	179700	253954	162965	136250	141457	325547	250904	240273	179700	162224
Medium	0.033	A0A2R8RPF6	Si:dkey-40c11.2 OS=Danio rerio OX=7955 GN=si:dkey-40c11.2 PE=1 SV=1	1.406	0.598	0.928777	0.993002	55912.3	52917.2	80067.7	129839	141540	84571.6	49846.4	76464.8	41795.4	37253.1	63024.2	71474.2	82794.1	59157.5	49846.4	48845.2
High	0	Q503D7	RNA-binding motif protein 14a OS=Danio rerio OX=7955 GN=rbm14a PE=1 SV=1	1.392	0.666	0.930883	0.993002	4.0548e+06	3.07265e+06	6.19585e+06	8.42146e+06	9.25278e+06	5.91207e+06	2.50746e+06	5.85731e+06	3.03103e+06	2.16311e+06	4.87698e+06	4.63586e+06	5.41242e+06	4.13547e+06	2.50746e+06	3.7416e+06
High	0	F1QT01	Beta-B1 crystallin (Fragment) OS=Danio rerio OX=7955 GN=crybb1 PE=1 SV=1	0.965	0.593	0.930883	0.993002	2.55275e+07	2.50616e+07	1.55437e+07	3.80729e+07	5.70616e+07	2.7078e+07	7.5615e+06	3.10572e+07	1.90823e+07	1.76431e+07	1.2235e+07	2.09585e+07	3.33782e+07	1.8941e+07	7.5615e+06	1.98391e+07
High	0	F1QXP5	C-1-tetrahydrofolate synthase, cytoplasmic OS=Danio rerio OX=7955 GN=mthfd1b PE=1 SV=1	0.974	0.607	0.938374	0.993002	3.04832e+06	1.90245e+06	1.43312e+06	3.18175e+06	4.14514e+06	2.37836e+06	618640	2.26571e+06	2.27867e+06	1.33931e+06	1.12806e+06	1.75149e+06	2.42471e+06	1.66366e+06	618640	1.44732e+06
High	0	A0A0R4IJT8	CCT-theta OS=Danio rerio OX=7955 GN=cct8 PE=1 SV=1	1.374	0.65	0.954849	0.993002	812559	496395	1.23412e+06	1.70559e+06	2.9653e+06	1.93378e+06	329133	1.6671e+06	607402	349457	971417	938893	1.73456e+06	1.35267e+06	329133	1.06493e+06
High	0	Q6PBW3	Ribosomal protein S14 OS=Danio rerio OX=7955 GN=rps14 PE=1 SV=1	0.985	0.612	0.954849	0.993002	2.40461e+06	2.84432e+06	3.41115e+06	6.47397e+06	1.07574e+07	4.90316e+06	2.2622e+06	6.12507e+06	1.79749e+06	2.00237e+06	2.68504e+06	3.5638e+06	6.29254e+06	3.42974e+06	2.2622e+06	3.91265e+06
High	0	Q5XJ10	Glyceraldehyde-3-phosphate dehydrogenase OS=Danio rerio OX=7955 GN=gapdh PE=2 SV=2	1.009	0.66	0.968679	0.993002	1.15936e+06	1.04605e+06	807247	1.22329e+06	2.7823e+06	1.79258e+06	207429	1.66557e+06	866641	736406	635413	673396	1.62751e+06	1.2539e+06	207429	1.06395e+06
High	0	P83571	RuvB-like 2 OS=Danio rerio OX=7955 GN=ruvbl2 PE=1 SV=1	1.032	0.657	0.968679	0.993002	207164	181163	138140	287056	382182	200016	69312.4	251113	154859	127537	108735	158019	223558	139910	69312.4	160409
Medium	0.014	A0A0R4IP71	Telomerase RNA component-interacting RNase OS=Danio rerio OX=7955 GN=trir PE=1 SV=1	1.328	0.652	0.968679	0.993002	367195	287064	388903	584668	750399	486135	115958	489339	274485	202090	306120	321849	438947	340049	115958	312586
High	0.007	Q6TGT2	Cytotoxic granule-associated RNA-binding protein 1,-like OS=Danio rerio OX=7955 GN=tia1l PE=1 SV=1	1.284	0.651	0.968679	0.993002	86512.9	55034.5	57443.6	117644	172201	110132	27367.7	112118	64669.9	38743.7	45215.9	64761.1	100729	77037	27367.7	71620.5
High	0	X1WFJ8	Membrane protein, palmitoylated 3a (MAGUK p55 subfamily member 3) OS=Danio rerio OX=7955 GN=mpp3a PE=3 SV=1	1.345	0.639	0.968679	0.993002	215286	36558.7	198704	554594	388377	289775	135739	280491	160930	25737	156407	305294	227182	202696	135739	179176
High	0	F8W2N0	Annexin OS=Danio rerio OX=7955 GN=anxa11b PE=1 SV=1	1.009	0.636	0.968679	0.993002	927241	553851	843933	850900	1.79718e+06	1.04566e+06	475862	887783	693128	389906	664290	468405	1.05126e+06	731436	475862	567109
High	0	Q7ZVF9	Actin, cytoplasmic 2 OS=Danio rerio OX=7955 GN=actbb PE=1 SV=2	0.999	0.634	0.968679	0.993002	1.68629e+08	1.54273e+08	9.03485e+07	1.35276e+08	3.85532e+08	1.23297e+08	4.68854e+07	1.51404e+08	1.26053e+08	1.08607e+08	7.11166e+07	7.44671e+07	2.25517e+08	8.62461e+07	4.68854e+07	9.67158e+07
High	0	A0A0R4IVZ0	Nucleoporin 153 OS=Danio rerio OX=7955 GN=nup153 PE=1 SV=1	1.307	0.634	0.968679	0.993002	892938	786195	1.20052e+06	3.14528e+06	2.21432e+06	1.70372e+06	721633	1.69279e+06	667486	553473	944976	1.73142e+06	1.29527e+06	1.19175e+06	721633	1.08134e+06
High	0	B0V1K1	Aminoacyl tRNA synthetase complex-interacting multifunctional protein 1a OS=Danio rerio OX=7955 GN=aimp1a PE=1 SV=1	1.044	0.612	0.968679	0.993002	210062	171138	158148	268245	386292	236326	96446.1	203420	157025	120479	124484	147664	225962	165309	96446.1	129943
High	0	A0A0R4IKK9	Mitogen-activated protein kinase OS=Danio rerio OX=7955 GN=mapk10 PE=1 SV=2	1.325	0.611	0.968679	0.993002	711584	348460	1.14175e+06	1.26323e+06	1.40146e+06	1.13763e+06	283240	759466	531921	245312	898711	695387	819786	795767	283240	485142
High	0.007	A0A2R8QNV1	Alpha-tubulin N-acetyltransferase 1 OS=Danio rerio OX=7955 GN=atat1 PE=3 SV=1	1.032	0.608	0.968679	0.993002	119809	109071	84459.8	159886	251506	152861	50370	117939	89559.1	76784.6	66481.3	88014.5	147119	106926	50370	75338.6
High	0	F1QU55	Betaine--homocysteine S-methyltransferase 1 OS=Danio rerio OX=7955 GN=bhmt PE=1 SV=1	1.057	0.607	0.968679	0.993002	2.01401e+06	1.66475e+06	1.52906e+06	2.29388e+06	4.93009e+06	2.11023e+06	852070	2.32481e+06	1.50551e+06	1.17197e+06	1.20358e+06	1.26274e+06	2.88387e+06	1.4761e+06	852070	1.48507e+06
High	0	Q66I80	Fatty acid binding protein 11a OS=Danio rerio OX=7955 GN=fabp4a PE=1 SV=1	1.308	0.605	0.968679	0.993002	3.63346e+06	1.96683e+06	4.3326e+06	4.01924e+06	8.5218e+06	4.05033e+06	798487	4.72741e+06	2.71608e+06	1384631	3.41035e+06	2.21252e+06	4.98484e+06	2.83319e+06	798487	3.01983e+06
High	0	Q6PC77	ATP synthase subunit d, mitochondrial OS=Danio rerio OX=7955 GN=atp5pd PE=1 SV=1	1.024	0.603	0.968679	0.993002	661594	439763	231438	861135	2.03887e+06	530723	135786	676131	494553	309588	182173	474039	1.19264e+06	371239	135786	431908
High	0.001	P62084	40S ribosomal protein S7 OS=Danio rerio OX=7955 GN=rps7 PE=2 SV=1	1.333	0.595	0.968679	0.993002	155492	43017.9	184356	227884	275182	316746	25743.3	135545	116233	30284.1	145113	125446	160968	221563	25743.3	86585.2
High	0	B0S610	Heat shock cognate 70-kd protein,-like OS=Danio rerio OX=7955 GN=hsp70l PE=3 SV=1	1.294	0.587	0.968679	0.993002	8.82298e+06	5.14551e+06	9.63951e+06	2.29016e+07	1.58661e+07	1.25669e+07	3.18818e+06	9.85789e+06	6.59533e+06	3.62239e+06	7.58761e+06	1.26069e+07	9.28091e+06	8.79047e+06	3.18818e+06	6.29715e+06
High	0	B3DKJ0	T-complex protein 1 subunit eta OS=Danio rerio OX=7955 GN=cct7 PE=1 SV=1	1.267	0.652	0.97033	0.993002	1.84706e+06	1.33948e+06	1.83316e+06	2.77469e+06	4.62076e+06	2.52424e+06	471566	2.63533e+06	1.38071e+06	942981	1.44295e+06	1.52742e+06	2.70292e+06	1.7657e+06	471566	1.68343e+06
High	0	F1R1E9	Ubiquitin-conjugating enzyme E2 variant 1 OS=Danio rerio OX=7955 GN=ube2v1 PE=1 SV=2	1.066	0.634	0.97033	0.993002	1.86324e+06	1.10475e+06	1.98242e+06	1.58395e+06	1.78174e+06	1.20411e+06	992367	1.00505e+06	1.3928e+06	777730	1.56043e+06	871934	1.04223e+06	842267	992367	642021
High	0	Q6DHI5	NAD-dependent protein deacylase sirtuin-5, mitochondrial OS=Danio rerio OX=7955 GN=sirt5 PE=1 SV=1	1.274	0.588	0.97033	0.993002	1.18082e+06	721075	1.42598e+06	1.82545e+06	3.11191e+06	1.42998e+06	868431	1.48385e+06	882682	507629	1.12244e+06	1.00488e+06	1.82031e+06	1.00027e+06	868431	947874
Medium	0.044	Q6NWJ0	B-cell CLL/lymphoma 7 protein family member B-A OS=Danio rerio OX=7955 GN=bcl7ba PE=2 SV=1	1.075	0.61	0.978513	0.993002	145632	107907	121936	176673	284440	166784	74427.6	146986	108862	75965.2	95980.4	97255.2	166384	116665	74427.6	93893.7
High	0	P79735	GTP-binding nuclear protein Ran OS=Danio rerio OX=7955 GN=ran PE=2 SV=1	1.076	0.59	0.979421	0.993002	1.04013e+07	9.60609e+06	7.75511e+06	1.17455e+07	2.54527e+07	9.52652e+06	3.11244e+06	1.35509e+07	7.77518e+06	6.76258e+06	6.10433e+06	6.4657e+06	1.48886e+07	6.66377e+06	3.11244e+06	8.65619e+06
High	0	Q08BA1	ATP synthase subunit alpha OS=Danio rerio OX=7955 GN=atp5fa1 PE=1 SV=1	1.236	0.655	0.984174	0.993002	435296	306008	152744	593787	870661	456370	39321.6	594902	325391	215426	120230	326869	509294	319229	39321.6	380019
High	0	A0A0R4IJ49	40S ribosomal protein S19 OS=Danio rerio OX=7955 GN=rps19 PE=1 SV=1	1.239	0.649	0.984174	0.993002	626943	626910	577577	1.54495e+06	1.6294e+06	1.11965e+06	327844	1.07346e+06	468651	441338	454632	850468	953122	783190	327844	685717
High	0	Q803P2	CCT-alpha OS=Danio rerio OX=7955 GN=tcp1 PE=1 SV=1	1.093	0.607	0.984174	0.993002	748050	543888	661172	1.09281e+06	1.89132e+06	860508	230096	930617	559180	382892	520433	601573	1.10633e+06	601922	230096	594471
High	0	A0A0R4IC31	A kinase (PRKA) anchor protein 12b OS=Danio rerio OX=7955 GN=akap12b PE=1 SV=1	1.225	0.616	0.986185	0.993002	668314	593772	670259	1.09656e+06	1.35261e+06	946113	279914	893182	499576	418009	527585	603634	791213	661802	279914	570558
High	0	Q6IQV5	GTP cyclohydrolase 1 OS=Danio rerio OX=7955 GN=gch2 PE=1 SV=1	1.221	0.65	0.987084	0.993002	1.36775e+06	805651	1.80988e+06	6.39896e+06	2.83198e+06	2.36456e+06	1.48197e+06	2.10815e+06	1.02242e+06	567170	1.42462e+06	3.52251e+06	1.65657e+06	1.654e+06	1.48197e+06	1.34667e+06
High	0	F1QGS2	RHD domain-containing protein OS=Danio rerio OX=7955 GN=prrc2b PE=1 SV=2	1.105	0.644	0.987084	0.993002	254115	134740	151949	352163	411195	196621	139636	266900	189955	94855.9	119605	193859	240529	137536	139636	170494
High	0	F1QDM5	Mitochondrial ribosomal protein S11 OS=Danio rerio OX=7955 GN=mrps11 PE=1 SV=3	1.106	0.592	0.987084	0.993002	329365	266103	256860	460697	964692	336266	151765	387857	246206	187333	202184	253605	564298	235216	151765	247760
Medium	0.027	E7F1H9	YTH domain-containing family protein 2 OS=Danio rerio OX=7955 GN=ythdf2 PE=1 SV=1	1.219	0.647	0.987643	0.993002	98285	79732.3	65175.8	168663	220252	109108	42643.7	131659	73469.7	56130.7	51302.2	92845.9	128837	76320.3	42643.7	84103.1
High	0.001	F1QIJ2	N-alpha-acetyltransferase 35, NatC auxiliary subunit OS=Danio rerio OX=7955 GN=naa35 PE=1 SV=1	1.214	0.655	0.990512	0.993002	133152	127589	125197	241724	382609	158230	109467	206806	99533.3	89821.3	98546.7	133065	223808	110681	109467	132106
High	0.001	Q6PCR4	RAN-binding protein 3b OS=Danio rerio OX=7955 GN=ranbp3b PE=1 SV=1	1.214	0.604	0.990512	0.993002	924001	1.05206e+06	1.24368e+06	2.14369e+06	1.61125e+06	1.17267e+06	725768	1.12745e+06	690707	740637	978946	1.18006e+06	942502	820276	725768	720206
High	0	Q7ZV05	40S ribosomal protein S11 OS=Danio rerio OX=7955 GN=rps11 PE=1 SV=1	1.209	0.655	0.991219	0.993002	604411	856928	1.09384e+06	2.04839e+06	1.9403e+06	1.4416e+06	712467	1.25926e+06	451807	603269	860998	1.1276e+06	1.13498e+06	1.00839e+06	712467	804409
High	0	G1K2N0	40S ribosomal protein S25 OS=Danio rerio OX=7955 GN=rps25 PE=1 SV=1	1.188	0.653	0.991219	0.993002	1.54756e+06	1.20759e+06	1.06439e+06	2.42106e+06	2.79499e+06	1.88845e+06	727878	1.59073e+06	1.15683e+06	850127	837818	1.33275e+06	1.63493e+06	1.32096e+06	727878	1.01615e+06
High	0	Q5RGX4	Thymopoietin a OS=Danio rerio OX=7955 GN=tmpoa PE=1 SV=1	1.137	0.649	0.991219	0.993002	292643	174690	117032	328519	670666	359846	76496.1	322159	218756	122980	92120.4	180844	392307	251711	76496.1	205793
High	0	A0A0R4ILA8	Proteasome 26S subunit, ATPase 3 OS=Danio rerio OX=7955 GN=psmc3 PE=1 SV=1	1.133	0.635	0.991219	0.993002	941074	660824	910276	1.4255e+06	2.35342e+06	1.00819e+06	388433	1.23224e+06	703469	465213	716511	784710	1.37664e+06	705222	388433	787145
High	0	Q45FX9	BetaA2-2-crystallin OS=Danio rerio OX=7955 GN=cryba2b PE=1 SV=1	1.153	0.631	0.991219	0.993002	8.50808e+06	5.50452e+06	5.68204e+06	1.47816e+07	2.31225e+07	1.03342e+07	2.87991e+06	1.12978e+07	6.35993e+06	3.87512e+06	4.47254e+06	8.13701e+06	1.35256e+07	7.22874e+06	2.87991e+06	7.21698e+06
High	0	A0A2R8QQM5	40S ribosomal protein S30 OS=Danio rerio OX=7955 GN=faub PE=3 SV=1	1.172	0.63	0.991219	0.993002	2.11923e+06	2.34017e+06	1.57636e+06	4.18376e+06	4.1388e+06	3.29013e+06	854460	2.55957e+06	1.58416e+06	1.64746e+06	1.24081e+06	2.30308e+06	2.421e+06	2.30143e+06	854460	1.63503e+06
High	0	Q6PE25	Elongation factor 1-gamma OS=Danio rerio OX=7955 GN=eef1g PE=2 SV=1	1.179	0.616	0.991219	0.993002	132150		364405	640630	1.25555e+06	522907	232626	744076	98784.2		286836	352655	734438	365772	232626	475310
High	0.001	A7E2K4	60S acidic ribosomal protein P2 OS=Danio rerio OX=7955 GN=rplp2l PE=1 SV=1	1.152	0.614	0.991219	0.993002	616393	371047	346085	1.12587e+06	1.2323e+06	936202	220371	560379	460765	261213	272416	619770	720833	654870	220371	357966
High	0	A0A0R4IF39	DNA replication licensing factor MCM7 OS=Danio rerio OX=7955 GN=mcm7 PE=1 SV=2	1.193	0.612	0.991219	0.993002	1.7975e+06	1.42175e+06	1.40769e+06	2.20675e+06	3.67685e+06	1.87506e+06	782669	2.39532e+06	1.34366e+06	1.0009e+06	1.10804e+06	1.21478e+06	2.15078e+06	1.31159e+06	782669	1.53011e+06
High	0	A0A2R8Q5T8	Sema domain, immunoglobulin domain (Ig), short basic domain, secreted, (semaphorin) 3Fb OS=Danio rerio OX=7955 GN=sema3fb PE=3 SV=1	1.171	0.61	0.991219	0.993002	2.01577e+07	2.70569e+07	2.92559e+07	5.44337e+07	5.58773e+07	2.33815e+07	23821560	3.41072e+07	15068217	19047804	23028346	29964776	32685520	16355243	23821560	21787430
High	0.01	F1QC03	Zyxin OS=Danio rerio OX=7955 GN=zyx PE=1 SV=1	1.128	0.587	0.991219	0.993002	65582.6	89124.3	123599	189687	144987	85059.8	93136.2	79800.6	49024.1	62742.6	97289.4	104419	84810.6	59499	93136.2	50976
High	0.003	F1QL68	HECT-type E3 ubiquitin transferase (Fragment) OS=Danio rerio OX=7955 GN=huwe1 PE=1 SV=1	1.16	0.633	0.999876	0.993002	73007.4	37230.1	72269.5	89498.9	115806	121123	32884	56673.8	54574.3	26209.6	56885.9	49267.5	67741.1	84725.1	32884	36202.8
High	0	A0A1L1QZG0	T-complex protein 1 subunit beta (Fragment) OS=Danio rerio OX=7955 GN=cct2 PE=1 SV=1	1.162	0.656	1	0.993002	1.37245e+06	959452	697638	1.56544e+06	3.4338e+06	1.70555e+06	464644	1.34657e+06	1.02593e+06	675444	549136	861746	2008608	1.19303e+06	464644	860181
High	0.002	Q5RHR6	Protein broad-minded OS=Danio rerio OX=7955 GN=tbc1d32 PE=3 SV=2	1.595	0.629	0.770471	0.993769	353527	173195	355991	832672	1.04901e+06	660182	262922	290136	264268	121928	280213	458371	613618	461794	262922	185337
High	0	Q52PJ5	Dihydropyrimidinase-related protein 3 OS=Danio rerio OX=7955 GN=dpysl3 PE=2 SV=1	0.856	0.628	0.801646	0.993769	1.48227e+06	989667	762036	1.38867e+06	2.80598e+06	1.60588e+06	389106	1.37843e+06	1.10802e+06	696715	599826	764437	1.64136e+06	1.1233e+06	389106	880532
High	0	A0A2R8Q8M1	Peroxiredoxin 6 OS=Danio rerio OX=7955 GN=prdx6 PE=1 SV=1	1.001	0.629	0.968679	0.993769	1.02308e+06	273958	825260	905974	2.01533e+06	1.11602e+06	158613	748356	764770	192864	649592	498722	1.17887e+06	780652	158613	478045
High	0	Q6P963	Hydroxyacylglutathione hydrolase, mitochondrial OS=Danio rerio OX=7955 GN=hagh PE=2 SV=2	1.234	0.618	0.984174	0.993769	195647	169094	199681	379667	422914	224380	154130	261344	146249	119040	157176	209000	247384	156953	154130	166945
High	0.002	A0A0R4IE20	AHA1, activator of heat shock protein ATPase homolog 1b OS=Danio rerio OX=7955 GN=ahsa1b PE=1 SV=1	2.278	0.62	0.199381	0.999991		55795	837068	1.3225e+06	1.45023e+06	805168	455118	883997		39279.1	658886	728013	848312	563212	455118	564691
High	0.01	Q6NX09	Hexokinase OS=Danio rerio OX=7955 GN=hk1 PE=1 SV=1	2.019	0.622	0.363026	1	37572	31913.7	80558.9	88181.6	174522	52445.6		93198.1	28085.7	22466.9	63410.8	48542.4	102087	36685.5		59534.3
High	0	Q6DGB2	Inositol-1-monophosphatase OS=Danio rerio OX=7955 GN=impa1 PE=1 SV=1	0.712	0.622	0.458335	1	422667	208424	270167	256252	527668	275438	110391	328381	315951	146728	212658	141062	308660	192668	110391	209767
High	0	Q6TH32	Cofilin 1 OS=Danio rerio OX=7955 GN=cfl1 PE=1 SV=1	0.807	0.625	0.686815	1	1.38678e+08	1.14234e+08	9.17436e+07	1.37772e+08	2.42042e+08	1.11752e+08	6.70745e+07	1.19446e+08	1.03664e+08	8.04193e+07	7.22147e+07	7.58412e+07	1.41583e+08	7.81701e+07	6.70745e+07	7.63011e+07
High	0	F1Q8J4	Acyl-CoA dehydrogenase very long chain OS=Danio rerio OX=7955 GN=acadvl PE=1 SV=1	0.809	0.623	0.687539	1	1.02602e+06	892332	940286	1.08609e+06	1.59339e+06	993021	553234	774405	766970	628192	740133	597870	932058	694614	553234	494685
High	0	Q92005	Elongation factor 1-alpha OS=Danio rerio OX=7955 GN=eef1a PE=2 SV=1	1.411	0.626	0.924756	1	5.68234e+08	5.22693e+08	4.69526e+08	9.38408e+08	1.15106e+09	5.90546e+08	2.48023e+08	6.78779e+08	4.24765e+08	3.6797e+08	3.69581e+08	5.16577e+08	6.73312e+08	4.13084e+08	2.48023e+08	4.33599e+08
High	0.001	Q7ZWA3	RNA-binding motif protein, X chromosome OS=Danio rerio OX=7955 GN=rbmx PE=2 SV=1	0.968	0.623	0.930883	1	101802	90421.3	89744.7	258460	160455	193778	55904.7	92855	76098.6	63655.7	70641.3	142278	93858.2	135547	55904.7	59315.1
High	0	Q7ZVF3	Succinate dehydrogenase [ubiquinone] flavoprotein subunit, mitochondrial OS=Danio rerio OX=7955 GN=sdha PE=2 SV=2	1.267	0.622	0.97033	1	819330	607614	847482	2.46351e+06	2.52544e+06	1.43689e+06	486542	1.44854e+06	612463	427754	667084	1.35612e+06	1.47726e+06	1.0051e+06	486542	925314
High	0.002	Q6DHL6	40S ribosomal protein S6 OS=Danio rerio OX=7955 GN=rps6 PE=1 SV=1	1.068	0.623	0.971082	1	138480	65924.1	121111	214043	256290	164042	49890.1	133404	103516	46409.9	95331.1	117827	149917	114747	49890.1	85217.6
High	0.001	Q566W6	Cold-inducible RNA-binding protein a OS=Danio rerio OX=7955 GN=cirbpa PE=1 SV=1	1.141	0.621	0.991219	1	149335	69743.5	97701.5	255870	292177	141473	60698.6	205236	111630	49098.7	76904.4	140852	170910	98959.9	60698.6	131103
High	0.007	A5PLJ7	Non-specific serine/threonine protein kinase OS=Danio rerio OX=7955 GN=oxsr1a PE=1 SV=1	0.01		1.21569e-16		524900	486642							392372	342591
Medium	0.044	D1FTM8	Anion exchange protein OS=Danio rerio OX=7955 GN=slc4a1b PE=2 SV=1	0.01		1.21569e-16		512098	401360							382802	282553
High	0	E7FC32	Tubulin beta chain OS=Danio rerio OX=7955 GN=tubb1 PE=1 SV=1
High	0	F1QWW1	Pseudouridine synthase 1 OS=Danio rerio OX=7955 GN=pus1 PE=1 SV=1
High	0.002	A0A2R8QFY0	Uncharacterized protein OS=Danio rerio OX=7955 PE=3 SV=1
Medium	0.015	A1A5X4	adducin 1 (Alpha) OS=Danio rerio OX=7955 GN=add1 PE=1 SV=1
Medium	0.018	F1Q9D2	Copine III OS=Danio rerio OX=7955 GN=cpne3 PE=1 SV=2
Medium	0.018	A0A2R8Q8N8	PEST proteolytic signal-containing nuclear protein OS=Danio rerio OX=7955 GN=LOC110437793 PE=4 SV=1
Medium	0.026	I3IS60	Si:ch211-244a23.1 OS=Danio rerio OX=7955 GN=pkhd1l1.2 PE=4 SV=1
Medium	0.029	A0A0R4IBM0	Neuregulin 1 OS=Danio rerio OX=7955 GN=nrg1 PE=3 SV=1
Medium	0.029	Q4KME9	Ribose-phosphate diphosphokinase OS=Danio rerio OX=7955 GN=prps1a PE=1 SV=1
Medium	0.032	A0A2R8QHE3	SAM domain-containing protein OS=Danio rerio OX=7955 GN=sfmbt1 PE=4 SV=1
Medium	0.041	B0UYM5	LIM domain 7a (Fragment) OS=Danio rerio OX=7955 GN=lmo7a PE=4 SV=1
Medium	0.049	A0A2R8QGU5	Synaptotagmin XIVa OS=Danio rerio OX=7955 GN=syt14a PE=4 SV=1
Medium	0.049	B3DFN3	Lamin B2 OS=Danio rerio OX=7955 GN=lmnb2 PE=1 SV=1
