# Supplementary material for: Strip1 regulates retinal ganglion cell survival by suppressing Jun-mediated apoptosis to promote retinal neural circuit formation
Source: eLife. 2022 Mar 22;11:e74650. doi: 10.7554/eLife.74650 (PMC8940179; doi:10.7554/eLife.74650)
Supplement: Figure 5—source data 3. [file elife-74650-fig5-data3.xlsx]

## Sheet: Figure 5F
Number of TUNEL+ cells in GCL				Mann Whitney test
STD-MO	MO-strn3			P value	0.0012
1	5			Exact or approximate P value?	Exact
0	6			P value summary	**
0	10			Significantly different (P < 0.05)?	Yes
1	5			One- or two-tailed P value?	Two-tailed
1	9			Sum of ranks in column A,B	21 , 70
0	3			Mann-Whitney U	0
	4

## Sheet: Figure 5G
Percentage of ath5+ area/total retina area				Unpaired t test with Welch's correction
STD-MO	MO-strn3			P value	0.0003
22.2073	15.4232			P value summary	***
23.4029	14.1018			Significantly different (P < 0.05)?	Yes
24.121	13.4502			One- or two-tailed P value?	Two-tailed
	16.6541			Welch-corrected t, df	t=9.212, df=4.992

## Sheet: Figure 5I
Percentage of ath5+ area/total retina area				Unpaired t test with Welch's correction
STD-MO	MO-strn3			P value	<0.0001
26.6337	17.7864			P value summary	****
25.3707	17.8634			Significantly different (P < 0.05)?	Yes
26.6436	14.7236			One- or two-tailed P value?	Two-tailed
24.2665	13.9323			Welch-corrected t, df	t=7.667, df=11.86
27.0281	19.6557
23.4728	22.2287
28.7338	16.9543
25.498	17.2133
