# Supplementary material for: Strip1 regulates retinal ganglion cell survival by suppressing Jun-mediated apoptosis to promote retinal neural circuit formation
Source: eLife. 2022 Mar 22;11:e74650. doi: 10.7554/eLife.74650 (PMC8940179; doi:10.7554/eLife.74650)
Supplement: Figure 6—figure supplement 2—source data 1. [file elife-74650-fig6-figsupp2-data1.xlsx]

## Sheet: Figure 6-figure supplement 2B
Percentage of p-Jun/Zn5 area			Mann Whitney test
WT	strip1rw147		P value	0.0061
3.90204	11.6291		Exact or approximate P value?	Exact
5.32196	10.7642		P value summary	**
6.14395	7.42248		Significantly different (P < 0.05)?	Yes
3.54665	10.6121		One- or two-tailed P value?	Two-tailed
	9.09495		Sum of ranks in column A,B	10 , 56
	11.8648		Mann-Whitney U	0
	11.7824
