# Supplementary material for: Strip1 regulates retinal ganglion cell survival by suppressing Jun-mediated apoptosis to promote retinal neural circuit formation
Source: eLife. 2022 Mar 22;11:e74650. doi: 10.7554/eLife.74650 (PMC8940179; doi:10.7554/eLife.74650)
Supplement: Figure 6—source data 1. [file elife-74650-fig6-data1.xlsx]

## Sheet: downregulated genes
Gene stable ID	Gene description	Gene name	LogFC	PValue	FDR
ENSDARG00000071629		BX511034.1	-9.27349	2.27e-19	4.5e-16
ENSDARG00000013022	si:ch211-59h6.1 [Source:ZFIN;Acc:ZDB-GENE-091204-418]	si:ch211-59h6.1	-6.41645	4.77e-18	7.36e-15
ENSDARG00000069737	POU class 4 homeobox 2 [Source:ZFIN;Acc:ZDB-GENE-040401-1]	pou4f2	-1.68405	9.82e-18	1.44e-14
ENSDARG00000036051	iroquois homeobox 4b [Source:ZFIN;Acc:ZDB-GENE-040712-4]	irx4b	-2.31913	2.29e-16	2.76e-13
ENSDARG00000071644	si:dkey-19a16.7 [Source:ZFIN;Acc:ZDB-GENE-060503-903]	si:dkey-19a16.7	-8.92804	3.72e-16	4.3e-13
ENSDARG00000100000		CR352226.5	-7.40054	5.46e-16	6.07e-13
ENSDARG00000045930	RNA binding protein, mRNA processing factor 2a [Source:ZFIN;Acc:ZDB-GENE-040718-106]	rbpms2a	-1.24886	7.78e-16	8.01e-13
ENSDARG00000035648	iroquois homeobox 4a [Source:ZFIN;Acc:ZDB-GENE-040426-1825]	irx4a	-1.75807	7.64e-16	8.01e-13
ENSDARG00000056745	N-terminal EF-hand calcium binding protein 2 [Source:ZFIN;Acc:ZDB-GENE-050706-167]	necab2	-1.60621	1.04e-15	1.04e-12
ENSDARG00000099364		BX511034.5	-8.50086	2.58e-14	2.05e-11
ENSDARG00000088330	hemoglobin, alpha embryonic 1.3 [Source:ZFIN;Acc:ZDB-GENE-061207-39]	hbae1.3	-2.08342	1.33e-13	1.03e-10
ENSDARG00000117174		CT583728.27	-2.48104	1.44e-13	1.08e-10
ENSDARG00000109566	E3 ubiquitin-protein ligase RBBP6-like [Source:NCBI gene;Acc:103911535]	CABZ01052747.1	-8.64329	2.47e-13	1.71e-10
ENSDARG00000053499	ISL LIM homeobox 2b [Source:NCBI gene;Acc:30151]	isl2b	-1.57882	3.02e-13	2.05e-10
ENSDARG00000005559	POU class 4 homeobox 1 [Source:ZFIN;Acc:ZDB-GENE-000523-2]	pou4f1	-1.66241	2.14e-12	1.35e-09
ENSDARG00000058794	si:dkey-19a16.2 [Source:ZFIN;Acc:ZDB-GENE-050208-493]	si:dkey-19a16.2	-5.88766	2.65e-11	1.63e-08
ENSDARG00000087981	solute carrier family 6 member 11b [Source:ZFIN;Acc:ZDB-GENE-121116-2]	slc6a11b	-2.33049	9.3e-11	5.5e-08
ENSDARG00000015536	SRY-box transcription factor 6 [Source:ZFIN;Acc:ZDB-GENE-081120-6]	sox6	-1.24929	1.02e-10	5.92e-08
ENSDARG00000107989	protein FAM163B-like [Source:NCBI gene;Acc:794939]	FAM163B	-2.49321	1.18e-10	6.66e-08
ENSDARG00000101095	copine IVa [Source:ZFIN;Acc:ZDB-GENE-060503-427]	cpne4a	-2.92486	2.26e-10	1.23e-07
ENSDARG00000059815	ornithine decarboxylase antizyme 2b [Source:ZFIN;Acc:ZDB-GENE-070313-1]	oaz2b	-2.734	5.3e-10	2.58e-07
ENSDARG00000004712	T-box brain transcription factor 1b [Source:ZFIN;Acc:ZDB-GENE-000323-1]	tbr1b	-1.7982	6.72e-10	3.22e-07
ENSDARG00000055559	cholinergic receptor, nicotinic, alpha 6 [Source:ZFIN;Acc:ZDB-GENE-090312-91]	chrna6	-1.45667	7.19e-10	3.39e-07
ENSDARG00000070543	glutamate receptor, ionotropic, N-methyl D-aspartate 2A, b [Source:ZFIN;Acc:ZDB-GENE-070424-223]	grin2ab	-1.24628	1.12e-09	5.17e-07
ENSDARG00000109715	synuclein, gamma b (breast cancer-specific protein 1) [Source:ZFIN;Acc:ZDB-GENE-050522-235]	sncgb	-1.48401	1.59e-09	7.25e-07
ENSDARG00000044375	zgc:158291 [Source:ZFIN;Acc:ZDB-GENE-061215-70]	zgc:158291	-1.08133	2.2e-09	9.54e-07
ENSDARG00000051875	immunoglobulin superfamily containing leucine-rich repeat 2 [Source:ZFIN;Acc:ZDB-GENE-050320-95]	islr2	-1.03998	6.9e-09	2.74e-06
ENSDARG00000069117	potassium voltage-gated channel, subfamily H (eag-related), member 5b [Source:ZFIN;Acc:ZDB-GENE-090319-1]	kcnh5b	-2.29088	1.18e-08	4.49e-06
ENSDARG00000062449	xenotropic and polytropic retrovirus receptor 1a [Source:ZFIN;Acc:ZDB-GENE-060503-362]	xpr1a	-1.31304	1.2e-08	4.5e-06
ENSDARG00000076856	FRAS1 related extracellular matrix 2a [Source:ZFIN;Acc:ZDB-GENE-081119-3]	frem2a	-1.34448	1.34e-08	4.89e-06
ENSDARG00000027963	CaM kinase-like vesicle-associated a [Source:ZFIN;Acc:ZDB-GENE-100819-2]	camkva	-2.04391	2.12e-08	7.44e-06
ENSDARG00000018997	complexin 2, like [Source:ZFIN;Acc:ZDB-GENE-040718-160]	cplx2l	-1.15836	2.59e-08	8.88e-06
ENSDARG00000079665	G protein-coupled receptor 158b [Source:ZFIN;Acc:ZDB-GENE-130530-875]	gpr158b	-2.14634	3.89e-08	1.32e-05
ENSDARG00000071643	zgc:171490 [Source:ZFIN;Acc:ZDB-GENE-080204-29]	zgc:171490	-8.01228	4.05e-08	1.36e-05
ENSDARG00000023445	ATPase plasma membrane Ca2+ transporting 3b [Source:ZFIN;Acc:ZDB-GENE-080409-2]	atp2b3b	-1.15435	5.13e-08	1.66e-05
ENSDARG00000078078	leucine rich repeat and fibronectin type III domain containing 4b [Source:ZFIN;Acc:ZDB-GENE-070705-473]	lrfn4b	-1.7002	5.15e-08	1.66e-05
ENSDARG00000017880	Kv channel interacting protein 3b, calsenilin [Source:ZFIN;Acc:ZDB-GENE-040426-1752]	kcnip3b	-2.34202	1.43e-07	4.28e-05
ENSDARG00000104640	uncharacterized LOC100006875 [Source:NCBI gene;Acc:100006875]	BX511034.7	-5.2794	2.7e-07	7.91e-05
ENSDARG00000093413	EGF-like repeats and discoidin I-like domains 3a [Source:ZFIN;Acc:ZDB-GENE-060503-366]	edil3a	-1.54507	2.74e-07	7.92e-05
ENSDARG00000079204	ADAM metallopeptidase domain 11 [Source:ZFIN;Acc:ZDB-GENE-070808-3]	adam11	-1.57326	6.8e-07	0.000184922
ENSDARG00000078842	tensin 1a [Source:ZFIN;Acc:ZDB-GENE-120215-32]	tns1a	-1.11178	1.08e-06	0.000285192
ENSDARG00000026796	glutamate receptor, metabotropic 1a [Source:ZFIN;Acc:ZDB-GENE-030131-7893]	grm1a	-1.19184	1.65e-06	0.000420785
ENSDARG00000116618	si:ch73-27e22.8 [Source:ZFIN;Acc:ZDB-GENE-100917-4]	si:ch73-27e22.8	-7.53038	2.88e-06	0.00069531
ENSDARG00000111423	si:ch73-27e22.1 [Source:ZFIN;Acc:ZDB-GENE-081031-107]	si:ch73-27e22.1	-6.87927	3.51e-06	0.00083228
ENSDARG00000074777	ankyrin 1, erythrocytic b [Source:ZFIN;Acc:ZDB-GENE-091113-6]	ank1b	-1.31927	3.88e-06	0.000912121
ENSDARG00000012555	adenylate kinase 5 [Source:ZFIN;Acc:ZDB-GENE-030131-8256]	ak5	-2.00805	5.02e-06	0.00115254
ENSDARG00000006206	POU class 4 homeobox 3 [Source:NCBI gene;Acc:30534]	pou4f3	-1.1525	5.54e-06	0.00125017
ENSDARG00000061416	C2 calcium dependent domain containing 4A [Source:ZFIN;Acc:ZDB-GENE-030131-5712]	c2cd4a	-2.1538	7.28e-06	0.00159261
ENSDARG00000077415	zmp:0000001175 [Source:ZFIN;Acc:ZDB-GENE-140106-135]	zmp:0000001175	-6.4811	8.48e-06	0.0017836
ENSDARG00000077327	anoctamin 11 [Source:ZFIN;Acc:ZDB-GENE-090313-245]	ano11	-2.57153	1.36e-05	0.00282006
ENSDARG00000001785	iroquois homeobox 2a [Source:ZFIN;Acc:ZDB-GENE-040426-1446]	irx2a	-1.02849	1.61e-05	0.0032368
ENSDARG00000032639	CD36 molecule (thrombospondin receptor) [Source:ZFIN;Acc:ZDB-GENE-040718-55]	cd36	-1.88797	1.71e-05	0.003392
ENSDARG00000010083	RNA binding fox-1 homolog 3a [Source:ZFIN;Acc:ZDB-GENE-111213-1]	rbfox3a	-1.10253	1.8e-05	0.00351804
ENSDARG00000097691	PCNA clamp associated factor [Source:ZFIN;Acc:ZDB-GENE-131127-543]	pclaf	-1.04709	1.87e-05	0.00361941
ENSDARG00000040008	neuronal differentiation 6a [Source:NCBI gene;Acc:114414]	neurod6a	-1.42255	1.88e-05	0.00361941
ENSDARG00000076873	un-named hu7912 [Source:ZFIN;Acc:ZDB-GENE-120727-20]	unm_hu7912	-1.87003	2.03e-05	0.0038624
ENSDARG00000032199	glypican 3 [Source:NCBI gene;Acc:387365]	gpc3	-2.21517	3.21e-05	0.00586068
ENSDARG00000018270	olfactomedin 1a [Source:ZFIN;Acc:ZDB-GENE-040718-194]	olfm1a	-1.10433	3.5e-05	0.00630535
ENSDARG00000060637	calsyntenin 2 [Source:ZFIN;Acc:ZDB-GENE-070911-2]	clstn2	-1.37259	4.5e-05	0.00775405
ENSDARG00000086645	heparan sulfate (glucosamine) 3-O-sulfotransferase 3B1b [Source:ZFIN;Acc:ZDB-GENE-070202-5]	hs3st3b1b	-1.2278	4.94e-05	0.00841739
ENSDARG00000057468	potassium voltage-gated channel, Shaw-related subfamily, member 2 [Source:ZFIN;Acc:ZDB-GENE-070410-118]	kcnc2	-1.57234	4.97e-05	0.00841739
ENSDARG00000079371	leucine rich repeat containing 3Ca [Source:ZFIN;Acc:ZDB-GENE-080327-9]	lrrc3ca	-2.9438	8.74e-05	0.0135526
ENSDARG00000054332	tripartite motif containing 66 [Source:ZFIN;Acc:ZDB-GENE-040724-145]	trim66	-1.54364	0.000113494	0.0168548
ENSDARG00000069423	transmembrane inner ear [Source:ZFIN;Acc:ZDB-GENE-061207-9]	tmie	-2.26509	0.000121902	0.0180071
ENSDARG00000098528	reticulon 4 receptor-like 1b [Source:ZFIN;Acc:ZDB-GENE-040310-3]	rtn4rl1b	-1.54869	0.000128227	0.0186812
ENSDARG00000051852	potassium voltage-gated channel, Shaw-related subfamily, member 1a [Source:ZFIN;Acc:ZDB-GENE-061220-10]	kcnc1a	-1.04606	0.000133123	0.0191552
ENSDARG00000104254	copine IVb [Source:ZFIN;Acc:ZDB-GENE-060503-926]	cpne4b	-1.94364	0.000137094	0.0195243
ENSDARG00000062447	HECT, C2 and WW domain containing E3 ubiquitin protein ligase 2a [Source:ZFIN;Acc:ZDB-GENE-090311-22]	hecw2a	-1.44913	0.000168063	0.0232203
ENSDARG00000115511		CU468041.2	-1.82902	0.000207803	0.027612
ENSDARG00000094738	lipoxygenase homology domains 1a [Source:ZFIN;Acc:ZDB-GENE-091112-20]	loxhd1a	-2.08504	0.000261135	0.0328144
ENSDARG00000098408	starch binding domain 1 [Source:ZFIN;Acc:ZDB-GENE-120817-2]	stbd1	-2.41927	0.000260017	0.0328144
ENSDARG00000075960	cadherin 24, type 2a [Source:ZFIN;Acc:ZDB-GENE-090312-96]	cdh24a	-1.29186	0.000266751	0.0330485
ENSDARG00000099854	5-hydroxytryptamine receptor 7 [Source:NCBI gene;Acc:100536080]	HTR7	-2.26293	0.000266337	0.0330485
ENSDARG00000094737	si:ch211-12e13.12 [Source:ZFIN;Acc:ZDB-GENE-070424-121]	si:ch211-12e13.12	-1.39274	0.000323983	0.0387816
ENSDARG00000115161		CABZ01069162.1	-3.8933	0.00044539	0.0498747

## Sheet: upregulated genes
Gene stable ID	Gene description	Gene name	LogFC	PValue	FDR
ENSDARG00000112702		BX537263.3	7.83843	2.04313e-64	5.67396e-60
ENSDARG00000089382	zgc:158463 [Source:ZFIN;Acc:ZDB-GENE-070410-9]	zgc:158463	7.01726	3.85126e-61	5.34766e-57
ENSDARG00000096403		CT027638.1	8.37378	1.17838e-50	1.09083e-46
ENSDARG00000036875	ribosomal protein S12 [Source:ZFIN;Acc:ZDB-GENE-030131-8951]	rps12	2.23694	7.24738e-45	5.03168e-41
ENSDARG00000059298	signal peptidase complex subunit 1 [Source:ZFIN;Acc:ZDB-GENE-050809-130]	spcs1	5.20585	6.96826e-31	3.87031e-27
ENSDARG00000013382	CWC15 spliceosome associated protein homolog [Source:NCBI gene;Acc:415140]	cwc15	4.7903	1.59296e-29	7.373e-26
ENSDARG00000076891	regulatory factor X-associated protein [Source:ZFIN;Acc:ZDB-GENE-091204-321]	rfxap	8.66749	7.67289e-29	3.04405e-25
ENSDARG00000001889	tubulin, alpha 1a [Source:ZFIN;Acc:ZDB-GENE-090507-4]	tuba1a	1.40575	1.70131e-23	5.90587e-20
ENSDARG00000007823	activating transcription factor 3 [Source:ZFIN;Acc:ZDB-GENE-040426-728]	atf3	2.14953	2.33729e-23	7.21209e-20
ENSDARG00000043932	stathmin-like 4, like [Source:ZFIN;Acc:ZDB-GENE-040718-301]	stmn4l	1.8679	6.52286e-23	1.81146e-19
ENSDARG00000113671		AL935186.9	5.53596	7.22265e-20	1.82346e-16
ENSDARG00000043467	NADH:ubiquinone oxidoreductase subunit B11 [Source:ZFIN;Acc:ZDB-GENE-050309-25]	ndufb11	2.55969	1.2506e-19	2.89419e-16
ENSDARG00000115988		AL935186.11	2.52769	1.66736e-19	3.56186e-16
ENSDARG00000106529	deoxyuridine triphosphatase [Source:ZFIN;Acc:ZDB-GENE-041010-93]	dut	1.96823	5.80703e-19	1.07511e-15
ENSDARG00000063916	NADH dehydrogenase subunit 4L [Source:NCBI gene;Acc:140538]	mt-nd4l	1.42188	1.53901e-18	2.67125e-15
ENSDARG00000038025	chromobox homolog 7a [Source:ZFIN;Acc:ZDB-GENE-050417-400]	cbx7a	3.25634	2.7805e-18	4.54219e-15
ENSDARG00000071573	LSM5 homolog, U6 small nuclear RNA and mRNA degradation associated [Source:ZFIN;Acc:ZDB-GENE-070822-23]	lsm5	2.52422	1.82992e-17	2.54094e-14
ENSDARG00000045367	tubulin, alpha 1b [Source:ZFIN;Acc:ZDB-GENE-030822-1]	tuba1b	1.46709	1.41062e-16	1.86544e-13
ENSDARG00000089124	hemoglobin, alpha embryonic 1.3 [Source:ZFIN;Acc:ZDB-GENE-061207-39]	hbae1.3	3.36083	1.67846e-16	2.11875e-13
ENSDARG00000043531	Jun proto-oncogene, AP-1 transcription factor subunit [Source:ZFIN;Acc:ZDB-GENE-030131-7859]	jun	1.60926	2.15731e-15	2.06588e-12
ENSDARG00000102899	cAMP responsive element modulator b [Source:ZFIN;Acc:ZDB-GENE-050417-150]	cremb	4.29415	2.81239e-15	2.60343e-12
ENSDARG00000097456	cytochrome C oxidase assembly factor 3b [Source:ZFIN;Acc:ZDB-GENE-030131-7433]	coa3b	3.9309	8.1525e-15	7.30333e-12
ENSDARG00000031981	pterin-4 alpha-carbinolamine dehydratase/dimerization cofactor of hepatocyte nuclear factor 1 alpha [Source:ZFIN;Acc:ZDB-GENE-040426-1787]	pcbd1	2.85844	9.11623e-15	7.91147e-12
ENSDARG00000115701	crystallin, gamma M2d9 [Source:ZFIN;Acc:ZDB-GENE-081105-81]	crygm2d9	1.25155	9.90355e-15	8.33429e-12
ENSDARG00000044521	eukaryotic translation elongation factor 1 beta 2 [Source:ZFIN;Acc:ZDB-GENE-030131-7310]	eef1b2	1.15053	1.8227e-14	1.48877e-11
ENSDARG00000098584		CABZ01102240.1	1.46823	1.59636e-13	1.16665e-10
ENSDARG00000101243		CABZ01049825.1	3.50504	1.89228e-13	1.34745e-10
ENSDARG00000063910	ATP synthase 8 [Source:NCBI gene;Acc:140520]	mt-atp8	1.82664	7.98138e-13	5.2774e-10
ENSDARG00000014941	Tp53rk binding protein [Source:NCBI gene;Acc:492501]	tprkb	3.29641	1.71477e-12	1.10746e-09
ENSDARG00000075891	spalt-like transcription factor 1b [Source:ZFIN;Acc:ZDB-GENE-020228-3]	sall1b	2.90976	4.68848e-11	2.83052e-08
ENSDARG00000116076		FO704772.3	1.7955	2.18719e-10	1.21481e-07
ENSDARG00000045755	coiled-coil domain containing 59 [Source:NCBI gene;Acc:564488]	ccdc59	3.30685	2.44989e-10	1.30838e-07
ENSDARG00000018637	SEC61 translocon gamma subunit [Source:ZFIN;Acc:ZDB-GENE-040718-203]	sec61g	3.24375	3.65989e-10	1.91771e-07
ENSDARG00000087206	chaperonin containing TCP1, subunit 2 (beta) [Source:ZFIN;Acc:ZDB-GENE-020419-6]	cct2	1.002	4.44585e-10	2.24483e-07
ENSDARG00000038574	secretogranin II (chromogranin C), b [Source:ZFIN;Acc:ZDB-GENE-061103-160]	scg2b	1.26634	4.61806e-10	2.29014e-07
ENSDARG00000115167		CABZ01078734.1	3.80141	1.86906e-09	8.239e-07
ENSDARG00000030106	stathmin-like 4 [Source:ZFIN;Acc:ZDB-GENE-040426-2732]	stmn4	1.27097	1.85383e-09	8.239e-07
ENSDARG00000079645	sc:d217 [Source:ZFIN;Acc:ZDB-GENE-080303-15]	sc:d217	1.62575	3.94467e-09	1.68535e-06
ENSDARG00000102317	ribosomal protein L26 [Source:ZFIN;Acc:ZDB-GENE-040426-2117]	rpl26	4.95641	4.43272e-09	1.86517e-06
ENSDARG00000035427	surfeit 6 [Source:ZFIN;Acc:ZDB-GENE-040426-1333]	surf6	3.01185	4.59388e-09	1.90413e-06
ENSDARG00000045143	hemoglobin beta embryonic-2 [Source:ZFIN;Acc:ZDB-GENE-040702-1]	hbbe2	1.75721	5.16162e-09	2.10799e-06
ENSDARG00000061235	ALG5 dolichyl-phosphate beta-glucosyltransferase [Source:ZFIN;Acc:ZDB-GENE-030131-6586]	alg5	3.35329	6.75567e-09	2.71901e-06
ENSDARG00000045773	zgc:162634 [Source:ZFIN;Acc:ZDB-GENE-050506-109]	PYURF	2.37877	9.78059e-09	3.82559e-06
ENSDARG00000052011	Ras-related associated with diabetes [Source:ZFIN;Acc:ZDB-GENE-030131-5607]	rrad	1.85026	1.17483e-08	4.4887e-06
ENSDARG00000033138	LYR motif containing 2 [Source:NCBI gene;Acc:569076]	lyrm2	2.43733	1.31042e-08	4.85222e-06
ENSDARG00000097610		BX005183.3	4.20833	1.57133e-08	5.66721e-06
ENSDARG00000093606	si:dkey-159f12.2 [Source:ZFIN;Acc:ZDB-GENE-081105-168]	si:dkey-159f12.2	4.30078	1.72487e-08	6.14121e-06
ENSDARG00000027740	adenylate cyclase activating polypeptide 1b [Source:ZFIN;Acc:ZDB-GENE-041010-89]	adcyap1b	1.57799	4.12156e-08	1.36262e-05
ENSDARG00000100474		LO017721.1	4.30859	7.72706e-08	2.46653e-05
ENSDARG00000113548	si:dkeyp-82b4.4 [Source:ZFIN;Acc:ZDB-GENE-110914-60]	si:dkeyp-82b4.4	4.91778	9.28746e-08	2.93093e-05
ENSDARG00000099744	growth associated protein 43 [Source:ZFIN;Acc:ZDB-GENE-990415-87]	gap43	1.37471	9.98584e-08	3.11592e-05
ENSDARG00000032126	secretogranin V [Source:ZFIN;Acc:ZDB-GENE-040426-1687]	scg5	2.00052	1.13101e-07	3.48992e-05
ENSDARG00000044684	retinol binding protein 4, like [Source:ZFIN;Acc:ZDB-GENE-030131-7591]	rbp4l	1.32018	1.42096e-07	4.28014e-05
ENSDARG00000115732	transmembrane and immunoglobulin domain-containing protein 1-like [Source:NCBI gene;Acc:110437711]	CT583625.6	6.59462	2.21641e-07	6.54807e-05
ENSDARG00000079145	uncharacterized LOC100007503 [Source:NCBI gene;Acc:100007503]	CABZ01077217.1	1.39176	2.87287e-07	8.225e-05
ENSDARG00000029688	heat shock cognate 70-kd protein, tandem duplicate 1 [Source:ZFIN;Acc:ZDB-GENE-990415-91]	hsp70.1	1.926	3.04709e-07	8.63478e-05
ENSDARG00000115978		AL935186.10	1.4521	3.68917e-07	0.000103487
ENSDARG00000101069		CU651669.1	3.13564	3.84125e-07	0.000106675
ENSDARG00000018566	filamin C, gamma a (actin binding protein 280) [Source:ZFIN;Acc:ZDB-GENE-070503-1]	flnca	2.6022	4.23123e-07	0.000116342
ENSDARG00000116119	dual specificity protein phosphatase 13-like [Source:NCBI gene;Acc:100537679]	CABZ01097761.1	1.95076	6.85857e-07	0.000184922
ENSDARG00000021924	heat shock cognate 70-kd protein, tandem duplicate 3 [Source:ZFIN;Acc:ZDB-GENE-110713-1]	hsp70.3	1.60499	8.87152e-07	0.000236895
ENSDARG00000039268	ER membrane protein complex subunit 4 [Source:NCBI gene;Acc:402956]	emc4	2.85361	1.46889e-06	0.000384837
ENSDARG00000089720		CABZ01077218.1	1.89647	1.48572e-06	0.000385608
ENSDARG00000113526		BX548011.3	4.64919	1.93928e-06	0.000489599
ENSDARG00000090600	si:ch211-213a13.1 [Source:ZFIN;Acc:ZDB-GENE-050208-471]	si:ch211-213a13.1	2.45727	1.97867e-06	0.000495043
ENSDARG00000099410	si:dkeyp-79b7.3 [Source:ZFIN;Acc:ZDB-GENE-050208-721]	si:dkeyp-79b7.3	3.71064	2.11414e-06	0.000524213
ENSDARG00000111458	wu:fi09b08 [Source:ZFIN;Acc:ZDB-GENE-030131-5630]	wu:fi09b08	5.01558	2.228e-06	0.000547555
ENSDARG00000096046		BX649307.1	4.23412	2.6119e-06	0.000636272
ENSDARG00000095724	si:ch211-196c10.15 [Source:ZFIN;Acc:ZDB-GENE-141216-138]	si:ch211-196c10.15	1.05042	3.24882e-06	0.000777784
ENSDARG00000100288	interphotoreceptor matrix proteoglycan 2b [Source:ZFIN;Acc:ZDB-GENE-081031-56]	impg2b	1.25013	4.00134e-06	0.000933792
ENSDARG00000044114	cytochrome b561 family, member D2 [Source:ZFIN;Acc:ZDB-GENE-041010-205]	cyb561d2	2.79444	5.4303e-06	0.00123611
ENSDARG00000040640	si:ch73-44m9.3 [Source:ZFIN;Acc:ZDB-GENE-081104-290]	si:ch73-44m9.3	2.293	5.7245e-06	0.00128206
ENSDARG00000099669		CR927050.2	4.12761	7.02961e-06	0.00156175
ENSDARG00000057644	ADAM metallopeptidase domain 8b [Source:ZFIN;Acc:ZDB-GENE-070808-1]	adam8b	1.97072	7.15946e-06	0.00157798
ENSDARG00000070961	leptin receptor [Source:ZFIN;Acc:ZDB-GENE-080104-1]	lepr	1.4009	7.52869e-06	0.00163343
ENSDARG00000092362	heat shock cognate 70-kd protein, tandem duplicate 2 [Source:ZFIN;Acc:ZDB-GENE-110405-1]	hsp70.2	1.15341	7.95029e-06	0.00171153
ENSDARG00000102540	sb:cb449 [Source:NCBI gene;Acc:100151018]	CR450832.1	2.93626	8.16474e-06	0.00173128
ENSDARG00000101794	ATPase H+ transporting V0 subunit e1 [Source:ZFIN;Acc:ZDB-GENE-041010-133]	atp6v0e1	1.25049	8.1667e-06	0.00173128
ENSDARG00000097560		BX511311.3	1.41364	1.49231e-05	0.00306985
ENSDARG00000093386	si:dkeyp-82a1.1 [Source:ZFIN;Acc:ZDB-GENE-081105-23]	si:dkeyp-82a1.1	2.45802	1.54833e-05	0.00316167
ENSDARG00000068082	WW domain binding protein 4 [Source:ZFIN;Acc:ZDB-GENE-050522-342]	wbp4	1.33387	2.22793e-05	0.00418054
ENSDARG00000078069	ribonucleotide reductase M2 polypeptide [Source:NCBI gene;Acc:30733]	rrm2	1.62725	2.55175e-05	0.00475602
ENSDARG00000104707		CU550719.2	5.7507	2.89986e-05	0.00536879
ENSDARG00000075045	chemokine (C-X-C motif) ligand 18b [Source:ZFIN;Acc:ZDB-GENE-090313-165]	cxcl18b	2.41468	3.09446e-05	0.00569115
ENSDARG00000094615	si:dkey-9p20.18 [Source:ZFIN;Acc:ZDB-GENE-070705-515]	si:dkey-9p20.18	3.48633	3.28428e-05	0.00596128
ENSDARG00000094456		AL928824.1	4.07116	3.51925e-05	0.00630535
ENSDARG00000110288	uncharacterized LOC101883331 [Source:NCBI gene;Acc:101883331]	CT583625.5	2.66486	3.8308e-05	0.00681956
ENSDARG00000103976		BX544877.2	5.74951	4.01142e-05	0.0070507
ENSDARG00000091085	leptin a [Source:ZFIN;Acc:ZDB-GENE-081001-1]	lepa	3.92126	4.14209e-05	0.00718938
ENSDARG00000100996		BX901898.2	2.70903	4.13309e-05	0.00718938
ENSDARG00000115819		CT583728.24	4.24693	4.53003e-05	0.00776565
ENSDARG00000115518		CR293501.2	2.82018	5.2325e-05	0.00875372
ENSDARG00000110428		CABZ01072614.1	3.35617	6.3614e-05	0.0105786
ENSDARG00000075015	heme-binding protein soul5 [Source:ZFIN;Acc:ZDB-GENE-110718-2]	soul5	1.90013	6.94166e-05	0.0114069
ENSDARG00000088466	thioredoxin related transmembrane protein 3b [Source:ZFIN;Acc:ZDB-GENE-060901-5]	tmx3b	1.18224	7.51714e-05	0.012067
ENSDARG00000113005	si:dkey-47k16.4 [Source:ZFIN;Acc:ZDB-GENE-110914-131]	si:dkey-47k16.4	3.50003	7.77213e-05	0.0122636
ENSDARG00000073708	zgc:171551 [Source:ZFIN;Acc:ZDB-GENE-080220-8]	zgc:171551	2.76796	7.76832e-05	0.0122636
ENSDARG00000110269	transmembrane protein 128 [Source:HGNC Symbol;Acc:HGNC:28201]	tmem107	1.45141	8.13692e-05	0.0127667
ENSDARG00000111013	diverse immunoglobulin domain-containing protein 1.1 [Source:ZFIN;Acc:ZDB-GENE-120305-1]	dicp1.1	2.58708	8.93186e-05	0.0137804
ENSDARG00000094692		CR384089.1	2.95656	0.000101155	0.015435
ENSDARG00000097310	zgc:193812 [Source:ZFIN;Acc:ZDB-GENE-081022-44]	zgc:193812	1.97458	0.000101026	0.015435
ENSDARG00000116751		BX537263.5	3.25198	0.000104724	0.015806
ENSDARG00000095424	si:ch211-133n4.7 [Source:ZFIN;Acc:ZDB-GENE-060503-665]	si:ch211-133n4.7	3.5094	0.00012296	0.0180674
ENSDARG00000096005		CT027801.1	4.20211	0.000145311	0.0204307
ENSDARG00000096271	membrane-associated ring finger (C3HC4) 7 [Source:ZFIN;Acc:ZDB-GENE-080204-121]	march7	1.27341	0.000168935	0.0232253
ENSDARG00000114307	uncharacterized LOC795083 [Source:NCBI gene;Acc:795083]	CR354612.1	6.40739	0.000184278	0.0250862
ENSDARG00000104106		CABZ01087953.1	4.1074	0.00019282	0.0261208
ENSDARG00000086463	kelch-like family member 13 [Source:ZFIN;Acc:ZDB-GENE-030131-2671]	klhl13	3.36148	0.000193759	0.0261208
ENSDARG00000092387	zgc:193742 [Source:ZFIN;Acc:ZDB-GENE-081022-37]	zgc:193742	1.74773	0.000204948	0.0274957
ENSDARG00000095051	si:ch211-236l14.1 [Source:ZFIN;Acc:ZDB-GENE-081104-492]	si:ch211-236l14.1	5.77164	0.000206982	0.027612
ENSDARG00000055653	nucleotide binding protein 2 (MinD homolog, E. coli) [Source:NCBI gene;Acc:641290]	nubp2	1.72144	0.000209331	0.0276825
ENSDARG00000115799	histone 1, H4, like [Source:ZFIN;Acc:ZDB-GENE-070927-10]	hist1h4l	4.57251	0.000210447	0.0276982
ENSDARG00000036070	zinc ribbon domain containing 1 [Source:ZFIN;Acc:ZDB-GENE-050320-131]	znrd1	1.85575	0.000213034	0.0279065
ENSDARG00000102258	si:dkey-1b17.1 [Source:ZFIN;Acc:ZDB-GENE-050208-688]	si:dkey-1b17.1	1.61118	0.000223165	0.0290211
ENSDARG00000037350	ribosomal protein L9 [Source:ZFIN;Acc:ZDB-GENE-030131-8646]	rpl9	1.06327	0.000252419	0.0321556
ENSDARG00000099787	enoyl CoA hydratase domain containing 3 [Source:NCBI gene;Acc:780842]	echdc3	1.77366	0.000259527	0.0328144
ENSDARG00000040118	zgc:113232 [Source:ZFIN;Acc:ZDB-GENE-050327-86]	zgc:113232	4.19726	0.00026659	0.0330485
ENSDARG00000042630	heme binding protein 2 [Source:ZFIN;Acc:ZDB-GENE-040426-914]	hebp2	1.22357	0.000267759	0.0330485
ENSDARG00000094135		BX936305.1	4.25626	0.000282564	0.0345686
ENSDARG00000079376	zgc:174153 [Source:ZFIN;Acc:ZDB-GENE-080215-7]	zgc:174153	3.90363	0.000317533	0.0382273
ENSDARG00000112940	gastrula zinc finger protein XlCGF8.2DB-like [Source:NCBI gene;Acc:108184006]	CT573263.1	2.52373	0.00032621	0.0388806
ENSDARG00000100188	RNA binding protein with serine rich domain 1 [Source:HGNC Symbol;Acc:HGNC:10080]	rnps1	2.10282	0.000346335	0.0411029
ENSDARG00000116586	ferritin, heavy polypeptide-like 27 [Source:ZFIN;Acc:ZDB-GENE-040718-72]	fthl27	2.20391	0.000352535	0.0416606
ENSDARG00000109743		BX324227.2	5.25988	0.000367102	0.0431983
ENSDARG00000110787	zinc finger protein 1102 [Source:ZFIN;Acc:ZDB-GENE-071004-71]	znf1102	1.98474	0.000371208	0.0434971
ENSDARG00000087061	si:ch211-71k14.1 [Source:ZFIN;Acc:ZDB-GENE-110411-283]	si:ch211-71k14.1	4.03039	0.000384152	0.0448248
ENSDARG00000101829	si:dkey-16b10.2 [Source:ZFIN;Acc:ZDB-GENE-120703-32]	si:dkey-16b10.2	2.79118	0.000389278	0.0452328
ENSDARG00000095687	si:dkey-84o3.3 [Source:ZFIN;Acc:ZDB-GENE-091113-21]	si:dkey-84o3.3	2.84653	0.000398054	0.0458687
ENSDARG00000105570	crestin [Source:ZFIN;Acc:ZDB-GENE-000208-13]	crestin	1.22213	0.000405951	0.0465854
ENSDARG00000096843	zgc:193593 [Source:ZFIN;Acc:ZDB-GENE-080723-21]	zgc:193593	5.25692	0.000427409	0.0484066
ENSDARG00000095549	si:dkeyp-106c3.2 [Source:ZFIN;Acc:ZDB-GENE-070705-527]	si:dkeyp-106c3.2	4.16941	0.000430537	0.0484066

## Sheet: Result
Gene stable ID	Gene description	Gene name	LogFC	PValue	FDR
ENSDARG00000112702		BX537263.3	7.83843	2.04e-64	5.67e-60
ENSDARG00000089382	zgc:158463 [Source:ZFIN;Acc:ZDB-GENE-070410-9]	zgc:158463	7.01726	3.85e-61	5.35e-57
ENSDARG00000096403		CT027638.1	8.37378	1.18e-50	1.09e-46
ENSDARG00000036875	ribosomal protein S12 [Source:ZFIN;Acc:ZDB-GENE-030131-8951]	rps12	2.23694	7.25e-45	5.03e-41
ENSDARG00000059298	signal peptidase complex subunit 1 [Source:ZFIN;Acc:ZDB-GENE-050809-130]	spcs1	5.20585	6.97e-31	3.87e-27
ENSDARG00000013382	CWC15 spliceosome associated protein homolog [Source:NCBI gene;Acc:415140]	cwc15	4.7903	1.59e-29	7.37e-26
ENSDARG00000076891	regulatory factor X-associated protein [Source:ZFIN;Acc:ZDB-GENE-091204-321]	rfxap	8.66749	7.67e-29	3.04e-25
ENSDARG00000001889	tubulin, alpha 1a [Source:ZFIN;Acc:ZDB-GENE-090507-4]	tuba1a	1.40575	1.7e-23	5.91e-20
ENSDARG00000007823	activating transcription factor 3 [Source:ZFIN;Acc:ZDB-GENE-040426-728]	atf3	2.14953	2.34e-23	7.21e-20
ENSDARG00000043932	stathmin-like 4, like [Source:ZFIN;Acc:ZDB-GENE-040718-301]	stmn4l	1.8679	6.52e-23	1.81e-19
ENSDARG00000113671		AL935186.9	5.53596	7.22e-20	1.82e-16
ENSDARG00000043467	NADH:ubiquinone oxidoreductase subunit B11 [Source:ZFIN;Acc:ZDB-GENE-050309-25]	ndufb11	2.55969	1.25e-19	2.89e-16
ENSDARG00000115988		AL935186.11	2.52769	1.67e-19	3.56e-16
ENSDARG00000071629		BX511034.1	-9.27349	2.27e-19	4.5e-16
ENSDARG00000106529	deoxyuridine triphosphatase [Source:ZFIN;Acc:ZDB-GENE-041010-93]	dut	1.96823	5.81e-19	1.08e-15
ENSDARG00000063916	NADH dehydrogenase subunit 4L [Source:NCBI gene;Acc:140538]	mt-nd4l	1.42188	1.54e-18	2.67e-15
ENSDARG00000038025	chromobox homolog 7a [Source:ZFIN;Acc:ZDB-GENE-050417-400]	cbx7a	3.25634	2.78e-18	4.54e-15
ENSDARG00000013022	si:ch211-59h6.1 [Source:ZFIN;Acc:ZDB-GENE-091204-418]	si:ch211-59h6.1	-6.41645	4.77e-18	7.36e-15
ENSDARG00000069737	POU class 4 homeobox 2 [Source:ZFIN;Acc:ZDB-GENE-040401-1]	pou4f2	-1.68405	9.82e-18	1.44e-14
ENSDARG00000071573	LSM5 homolog, U6 small nuclear RNA and mRNA degradation associated [Source:ZFIN;Acc:ZDB-GENE-070822-23]	lsm5	2.52422	1.83e-17	2.54e-14
ENSDARG00000045367	tubulin, alpha 1b [Source:ZFIN;Acc:ZDB-GENE-030822-1]	tuba1b	1.46709	1.41e-16	1.87e-13
ENSDARG00000089124	hemoglobin, alpha embryonic 1.3 [Source:ZFIN;Acc:ZDB-GENE-061207-39]	hbae1.3	3.36083	1.68e-16	2.12e-13
ENSDARG00000036051	iroquois homeobox 4b [Source:ZFIN;Acc:ZDB-GENE-040712-4]	irx4b	-2.31913	2.29e-16	2.76e-13
ENSDARG00000071644	si:dkey-19a16.7 [Source:ZFIN;Acc:ZDB-GENE-060503-903]	si:dkey-19a16.7	-8.92804	3.72e-16	4.3e-13
ENSDARG00000100000		CR352226.5	-7.40054	5.46e-16	6.07e-13
ENSDARG00000035648	iroquois homeobox 4a [Source:ZFIN;Acc:ZDB-GENE-040426-1825]	irx4a	-1.75807	7.64e-16	8.01e-13
ENSDARG00000045930	RNA binding protein, mRNA processing factor 2a [Source:ZFIN;Acc:ZDB-GENE-040718-106]	rbpms2a	-1.24886	7.78e-16	8.01e-13
ENSDARG00000056745	N-terminal EF-hand calcium binding protein 2 [Source:ZFIN;Acc:ZDB-GENE-050706-167]	necab2	-1.60621	1.04e-15	1.04e-12
ENSDARG00000043531	Jun proto-oncogene, AP-1 transcription factor subunit [Source:ZFIN;Acc:ZDB-GENE-030131-7859]	jun	1.60926	2.16e-15	2.07e-12
ENSDARG00000102899	cAMP responsive element modulator b [Source:ZFIN;Acc:ZDB-GENE-050417-150]	cremb	4.29415	2.81e-15	2.6e-12
ENSDARG00000097456	cytochrome C oxidase assembly factor 3b [Source:ZFIN;Acc:ZDB-GENE-030131-7433]	coa3b	3.9309	8.15e-15	7.3e-12
ENSDARG00000031981	pterin-4 alpha-carbinolamine dehydratase/dimerization cofactor of hepatocyte nuclear factor 1 alpha [Source:ZFIN;Acc:ZDB-GENE-040426-1787]	pcbd1	2.85844	9.12e-15	7.91e-12
ENSDARG00000115701	crystallin, gamma M2d9 [Source:ZFIN;Acc:ZDB-GENE-081105-81]	crygm2d9	1.25155	9.9e-15	8.33e-12
ENSDARG00000044521	eukaryotic translation elongation factor 1 beta 2 [Source:ZFIN;Acc:ZDB-GENE-030131-7310]	eef1b2	1.15053	1.82e-14	1.49e-11
ENSDARG00000099364		BX511034.5	-8.50086	2.58e-14	2.05e-11
ENSDARG00000088330	hemoglobin, alpha embryonic 1.3 [Source:ZFIN;Acc:ZDB-GENE-061207-39]	hbae1.3	-2.08342	1.33e-13	1.03e-10
ENSDARG00000117174		CT583728.27	-2.48104	1.44e-13	1.08e-10
ENSDARG00000098584		CABZ01102240.1	1.46823	1.6e-13	1.17e-10
ENSDARG00000101243		CABZ01049825.1	3.50504	1.89e-13	1.35e-10
ENSDARG00000109566	E3 ubiquitin-protein ligase RBBP6-like [Source:NCBI gene;Acc:103911535]	CABZ01052747.1	-8.64329	2.47e-13	1.71e-10
ENSDARG00000053499	ISL LIM homeobox 2b [Source:NCBI gene;Acc:30151]	isl2b	-1.57882	3.02e-13	2.05e-10
ENSDARG00000063910	ATP synthase 8 [Source:NCBI gene;Acc:140520]	mt-atp8	1.82664	7.98e-13	5.28e-10
ENSDARG00000014941	Tp53rk binding protein [Source:NCBI gene;Acc:492501]	tprkb	3.29641	1.71e-12	1.11e-09
ENSDARG00000005559	POU class 4 homeobox 1 [Source:ZFIN;Acc:ZDB-GENE-000523-2]	pou4f1	-1.66241	2.14e-12	1.35e-09
ENSDARG00000058794	si:dkey-19a16.2 [Source:ZFIN;Acc:ZDB-GENE-050208-493]	si:dkey-19a16.2	-5.88766	2.65e-11	1.63e-08
ENSDARG00000075891	spalt-like transcription factor 1b [Source:ZFIN;Acc:ZDB-GENE-020228-3]	sall1b	2.90976	4.69e-11	2.83e-08
ENSDARG00000087981	solute carrier family 6 member 11b [Source:ZFIN;Acc:ZDB-GENE-121116-2]	slc6a11b	-2.33049	9.3e-11	5.5e-08
ENSDARG00000015536	SRY-box transcription factor 6 [Source:ZFIN;Acc:ZDB-GENE-081120-6]	sox6	-1.24929	1.02e-10	5.92e-08
ENSDARG00000107989	protein FAM163B-like [Source:NCBI gene;Acc:794939]	FAM163B	-2.49321	1.18e-10	6.66e-08
ENSDARG00000116076		FO704772.3	1.7955	2.19e-10	1.21e-07
ENSDARG00000101095	copine IVa [Source:ZFIN;Acc:ZDB-GENE-060503-427]	cpne4a	-2.92486	2.26e-10	1.23e-07
ENSDARG00000045755	coiled-coil domain containing 59 [Source:NCBI gene;Acc:564488]	ccdc59	3.30685	2.45e-10	1.31e-07
ENSDARG00000018637	SEC61 translocon gamma subunit [Source:ZFIN;Acc:ZDB-GENE-040718-203]	sec61g	3.24375	3.66e-10	1.92e-07
ENSDARG00000095273	cytochrome c oxidase subunit 8A [Source:ZFIN;Acc:ZDB-GENE-030131-9136]	cox8a	0.925821	4.23e-10	2.17e-07
ENSDARG00000087206	chaperonin containing TCP1, subunit 2 (beta) [Source:ZFIN;Acc:ZDB-GENE-020419-6]	cct2	1.002	4.45e-10	2.24e-07
ENSDARG00000038574	secretogranin II (chromogranin C), b [Source:ZFIN;Acc:ZDB-GENE-061103-160]	scg2b	1.26634	4.62e-10	2.29e-07
ENSDARG00000059815	ornithine decarboxylase antizyme 2b [Source:ZFIN;Acc:ZDB-GENE-070313-1]	oaz2b	-2.734	5.3e-10	2.58e-07
ENSDARG00000004712	T-box brain transcription factor 1b [Source:ZFIN;Acc:ZDB-GENE-000323-1]	tbr1b	-1.7982	6.72e-10	3.22e-07
ENSDARG00000055559	cholinergic receptor, nicotinic, alpha 6 [Source:ZFIN;Acc:ZDB-GENE-090312-91]	chrna6	-1.45667	7.19e-10	3.39e-07
ENSDARG00000070543	glutamate receptor, ionotropic, N-methyl D-aspartate 2A, b [Source:ZFIN;Acc:ZDB-GENE-070424-223]	grin2ab	-1.24628	1.12e-09	5.17e-07
ENSDARG00000109715	synuclein, gamma b (breast cancer-specific protein 1) [Source:ZFIN;Acc:ZDB-GENE-050522-235]	sncgb	-1.48401	1.59e-09	7.25e-07
ENSDARG00000030106	stathmin-like 4 [Source:ZFIN;Acc:ZDB-GENE-040426-2732]	stmn4	1.27097	1.85e-09	8.24e-07
ENSDARG00000115167		CABZ01078734.1	3.80141	1.87e-09	8.24e-07
ENSDARG00000044375	zgc:158291 [Source:ZFIN;Acc:ZDB-GENE-061215-70]	zgc:158291	-1.08133	2.2e-09	9.54e-07
ENSDARG00000079645	sc:d217 [Source:ZFIN;Acc:ZDB-GENE-080303-15]	sc:d217	1.62575	3.94e-09	1.69e-06
ENSDARG00000102317	ribosomal protein L26 [Source:ZFIN;Acc:ZDB-GENE-040426-2117]	rpl26	4.95641	4.43e-09	1.87e-06
ENSDARG00000035427	surfeit 6 [Source:ZFIN;Acc:ZDB-GENE-040426-1333]	surf6	3.01185	4.59e-09	1.9e-06
ENSDARG00000045143	hemoglobin beta embryonic-2 [Source:ZFIN;Acc:ZDB-GENE-040702-1]	hbbe2	1.75721	5.16e-09	2.11e-06
ENSDARG00000061235	ALG5 dolichyl-phosphate beta-glucosyltransferase [Source:ZFIN;Acc:ZDB-GENE-030131-6586]	alg5	3.35329	6.76e-09	2.72e-06
ENSDARG00000051875	immunoglobulin superfamily containing leucine-rich repeat 2 [Source:ZFIN;Acc:ZDB-GENE-050320-95]	islr2	-1.03998	6.9e-09	2.74e-06
ENSDARG00000045773	zgc:162634 [Source:ZFIN;Acc:ZDB-GENE-050506-109]	PYURF	2.37877	9.78e-09	3.83e-06
ENSDARG00000052011	Ras-related associated with diabetes [Source:ZFIN;Acc:ZDB-GENE-030131-5607]	rrad	1.85026	1.17e-08	4.49e-06
ENSDARG00000069117	potassium voltage-gated channel, subfamily H (eag-related), member 5b [Source:ZFIN;Acc:ZDB-GENE-090319-1]	kcnh5b	-2.29088	1.18e-08	4.49e-06
ENSDARG00000062449	xenotropic and polytropic retrovirus receptor 1a [Source:ZFIN;Acc:ZDB-GENE-060503-362]	xpr1a	-1.31304	1.2e-08	4.5e-06
ENSDARG00000033138	LYR motif containing 2 [Source:NCBI gene;Acc:569076]	lyrm2	2.43733	1.31e-08	4.85e-06
ENSDARG00000076856	FRAS1 related extracellular matrix 2a [Source:ZFIN;Acc:ZDB-GENE-081119-3]	frem2a	-1.34448	1.34e-08	4.89e-06
ENSDARG00000097610		BX005183.3	4.20833	1.57e-08	5.67e-06
ENSDARG00000093606	si:dkey-159f12.2 [Source:ZFIN;Acc:ZDB-GENE-081105-168]	si:dkey-159f12.2	4.30078	1.72e-08	6.14e-06
ENSDARG00000027963	CaM kinase-like vesicle-associated a [Source:ZFIN;Acc:ZDB-GENE-100819-2]	camkva	-2.04391	2.12e-08	7.44e-06
ENSDARG00000100244	EBF transcription factor 3a [Source:NCBI gene;Acc:567751]	ebf3a	-0.873833	2.46e-08	8.55e-06
ENSDARG00000018997	complexin 2, like [Source:ZFIN;Acc:ZDB-GENE-040718-160]	cplx2l	-1.15836	2.59e-08	8.88e-06
ENSDARG00000079665	G protein-coupled receptor 158b [Source:ZFIN;Acc:ZDB-GENE-130530-875]	gpr158b	-2.14634	3.89e-08	1.32e-05
ENSDARG00000071643	zgc:171490 [Source:ZFIN;Acc:ZDB-GENE-080204-29]	zgc:171490	-8.01228	4.05e-08	1.36e-05
ENSDARG00000027740	adenylate cyclase activating polypeptide 1b [Source:ZFIN;Acc:ZDB-GENE-041010-89]	adcyap1b	1.57799	4.12e-08	1.36e-05
ENSDARG00000023445	ATPase plasma membrane Ca2+ transporting 3b [Source:ZFIN;Acc:ZDB-GENE-080409-2]	atp2b3b	-1.15435	5.13e-08	1.66e-05
ENSDARG00000078078	leucine rich repeat and fibronectin type III domain containing 4b [Source:ZFIN;Acc:ZDB-GENE-070705-473]	lrfn4b	-1.7002	5.15e-08	1.66e-05
ENSDARG00000100474		LO017721.1	4.30859	7.73e-08	2.47e-05
ENSDARG00000113548	si:dkeyp-82b4.4 [Source:ZFIN;Acc:ZDB-GENE-110914-60]	si:dkeyp-82b4.4	4.91778	9.29e-08	2.93e-05
ENSDARG00000099744	growth associated protein 43 [Source:ZFIN;Acc:ZDB-GENE-990415-87]	gap43	1.37471	9.99e-08	3.12e-05
ENSDARG00000032126	secretogranin V [Source:ZFIN;Acc:ZDB-GENE-040426-1687]	scg5	2.00052	1.13e-07	3.49e-05
ENSDARG00000079578	RNA binding protein, mRNA processing factor 2b [Source:ZFIN;Acc:ZDB-GENE-040426-741]	rbpms2b	-0.869636	1.3e-07	3.97e-05
ENSDARG00000044684	retinol binding protein 4, like [Source:ZFIN;Acc:ZDB-GENE-030131-7591]	rbp4l	1.32018	1.42e-07	4.28e-05
ENSDARG00000017880	Kv channel interacting protein 3b, calsenilin [Source:ZFIN;Acc:ZDB-GENE-040426-1752]	kcnip3b	-2.34202	1.43e-07	4.28e-05
ENSDARG00000115732	transmembrane and immunoglobulin domain-containing protein 1-like [Source:NCBI gene;Acc:110437711]	CT583625.6	6.59462	2.22e-07	6.55e-05
ENSDARG00000104640	uncharacterized LOC100006875 [Source:NCBI gene;Acc:100006875]	BX511034.7	-5.2794	2.7e-07	7.91e-05
ENSDARG00000093413	EGF-like repeats and discoidin I-like domains 3a [Source:ZFIN;Acc:ZDB-GENE-060503-366]	edil3a	-1.54507	2.74e-07	7.92e-05
ENSDARG00000079145	uncharacterized LOC100007503 [Source:NCBI gene;Acc:100007503]	CABZ01077217.1	1.39176	2.87e-07	8.23e-05
ENSDARG00000029688	heat shock cognate 70-kd protein, tandem duplicate 1 [Source:ZFIN;Acc:ZDB-GENE-990415-91]	hsp70.1	1.926	3.05e-07	8.63e-05
ENSDARG00000115978		AL935186.10	1.4521	3.69e-07	0.000103487
ENSDARG00000101069		CU651669.1	3.13564	3.84e-07	0.000106675
ENSDARG00000018566	filamin C, gamma a (actin binding protein 280) [Source:ZFIN;Acc:ZDB-GENE-070503-1]	flnca	2.6022	4.23e-07	0.000116342
ENSDARG00000079204	ADAM metallopeptidase domain 11 [Source:ZFIN;Acc:ZDB-GENE-070808-3]	adam11	-1.57326	6.8e-07	0.000184922
ENSDARG00000116119	dual specificity protein phosphatase 13-like [Source:NCBI gene;Acc:100537679]	CABZ01097761.1	1.95076	6.86e-07	0.000184922
ENSDARG00000021924	heat shock cognate 70-kd protein, tandem duplicate 3 [Source:ZFIN;Acc:ZDB-GENE-110713-1]	hsp70.3	1.60499	8.87e-07	0.000236895
ENSDARG00000078842	tensin 1a [Source:ZFIN;Acc:ZDB-GENE-120215-32]	tns1a	-1.11178	1.08e-06	0.000285192
ENSDARG00000039268	ER membrane protein complex subunit 4 [Source:NCBI gene;Acc:402956]	emc4	2.85361	1.47e-06	0.000384837
ENSDARG00000089720		CABZ01077218.1	1.89647	1.49e-06	0.000385608
ENSDARG00000041062	calbindin 2a [Source:ZFIN;Acc:ZDB-GENE-040426-1677]	calb2a	-0.845244	1.55e-06	0.00039892
ENSDARG00000026796	glutamate receptor, metabotropic 1a [Source:ZFIN;Acc:ZDB-GENE-030131-7893]	grm1a	-1.19184	1.65e-06	0.000420785
ENSDARG00000113526		BX548011.3	4.64919	1.94e-06	0.000489599
ENSDARG00000090600	si:ch211-213a13.1 [Source:ZFIN;Acc:ZDB-GENE-050208-471]	si:ch211-213a13.1	2.45727	1.98e-06	0.000495043
ENSDARG00000099410	si:dkeyp-79b7.3 [Source:ZFIN;Acc:ZDB-GENE-050208-721]	si:dkeyp-79b7.3	3.71064	2.11e-06	0.000524213
ENSDARG00000111458	wu:fi09b08 [Source:ZFIN;Acc:ZDB-GENE-030131-5630]	wu:fi09b08	5.01558	2.23e-06	0.000547555
ENSDARG00000096046		BX649307.1	4.23412	2.61e-06	0.000636272
ENSDARG00000116618	si:ch73-27e22.8 [Source:ZFIN;Acc:ZDB-GENE-100917-4]	si:ch73-27e22.8	-7.53038	2.88e-06	0.00069531
ENSDARG00000095724	si:ch211-196c10.15 [Source:ZFIN;Acc:ZDB-GENE-141216-138]	si:ch211-196c10.15	1.05042	3.25e-06	0.000777784
ENSDARG00000111423	si:ch73-27e22.1 [Source:ZFIN;Acc:ZDB-GENE-081031-107]	si:ch73-27e22.1	-6.87927	3.51e-06	0.00083228
ENSDARG00000074777	ankyrin 1, erythrocytic b [Source:ZFIN;Acc:ZDB-GENE-091113-6]	ank1b	-1.31927	3.88e-06	0.000912121
ENSDARG00000100288	interphotoreceptor matrix proteoglycan 2b [Source:ZFIN;Acc:ZDB-GENE-081031-56]	impg2b	1.25013	4e-06	0.000933792
ENSDARG00000038814	Danio rerio myosin VIIA and Rab interacting protein (myrip), mRNA. [Source:RefSeq mRNA;Acc:NM_001353925]	myrip	-0.868156	4.55e-06	0.00105212
ENSDARG00000012555	adenylate kinase 5 [Source:ZFIN;Acc:ZDB-GENE-030131-8256]	ak5	-2.00805	5.02e-06	0.00115254
ENSDARG00000044114	cytochrome b561 family, member D2 [Source:ZFIN;Acc:ZDB-GENE-041010-205]	cyb561d2	2.79444	5.43e-06	0.0012361
ENSDARG00000006206	POU class 4 homeobox 3 [Source:NCBI gene;Acc:30534]	pou4f3	-1.1525	5.54e-06	0.00125017
ENSDARG00000040640	si:ch73-44m9.3 [Source:ZFIN;Acc:ZDB-GENE-081104-290]	si:ch73-44m9.3	2.293	5.72e-06	0.00128206
ENSDARG00000099669		CR927050.2	4.12761	7.03e-06	0.00156175
ENSDARG00000057644	ADAM metallopeptidase domain 8b [Source:ZFIN;Acc:ZDB-GENE-070808-1]	adam8b	1.97072	7.16e-06	0.00157798
ENSDARG00000061416	C2 calcium dependent domain containing 4A [Source:ZFIN;Acc:ZDB-GENE-030131-5712]	c2cd4a	-2.1538	7.28e-06	0.00159261
ENSDARG00000070961	leptin receptor [Source:ZFIN;Acc:ZDB-GENE-080104-1]	lepr	1.4009	7.53e-06	0.00163343
ENSDARG00000092362	heat shock cognate 70-kd protein, tandem duplicate 2 [Source:ZFIN;Acc:ZDB-GENE-110405-1]	hsp70.2	1.15341	7.95e-06	0.00171153
ENSDARG00000102540	sb:cb449 [Source:NCBI gene;Acc:100151018]	CR450832.1	2.93626	8.16e-06	0.00173128
ENSDARG00000101794	ATPase H+ transporting V0 subunit e1 [Source:ZFIN;Acc:ZDB-GENE-041010-133]	atp6v0e1	1.25049	8.17e-06	0.00173128
ENSDARG00000077415	zmp:0000001175 [Source:ZFIN;Acc:ZDB-GENE-140106-135]	zmp:0000001175	-6.4811	8.48e-06	0.0017836
ENSDARG00000086362	POU class 6 homeobox 2 [Source:ZFIN;Acc:ZDB-GENE-091118-71]	pou6f2	-0.988217	9.83e-06	0.00205355
ENSDARG00000077327	anoctamin 11 [Source:ZFIN;Acc:ZDB-GENE-090313-245]	ano11	-2.57153	1.36e-05	0.00282006
ENSDARG00000097560		BX511311.3	1.41364	1.49e-05	0.00306985
ENSDARG00000093386	si:dkeyp-82a1.1 [Source:ZFIN;Acc:ZDB-GENE-081105-23]	si:dkeyp-82a1.1	2.45802	1.55e-05	0.00316167
ENSDARG00000061885	SATB homeobox 2 [Source:ZFIN;Acc:ZDB-GENE-070912-212]	satb2	-0.98893	1.6e-05	0.0032368
ENSDARG00000001785	iroquois homeobox 2a [Source:ZFIN;Acc:ZDB-GENE-040426-1446]	irx2a	-1.02849	1.61e-05	0.0032368
ENSDARG00000104436	zgc:153426 [Source:ZFIN;Acc:ZDB-GENE-060929-220]	zgc:153426	-0.716871	1.65e-05	0.00328949
ENSDARG00000032639	CD36 molecule (thrombospondin receptor) [Source:ZFIN;Acc:ZDB-GENE-040718-55]	cd36	-1.88797	1.71e-05	0.003392
ENSDARG00000045131	inhibitor of DNA binding 4 [Source:ZFIN;Acc:ZDB-GENE-051113-208]	id4	-0.7953	1.74e-05	0.00341951
ENSDARG00000010083	RNA binding fox-1 homolog 3a [Source:ZFIN;Acc:ZDB-GENE-111213-1]	rbfox3a	-1.10253	1.8e-05	0.00351804
ENSDARG00000097691	PCNA clamp associated factor [Source:ZFIN;Acc:ZDB-GENE-131127-543]	pclaf	-1.04709	1.87e-05	0.00361941
ENSDARG00000040008	neuronal differentiation 6a [Source:NCBI gene;Acc:114414]	neurod6a	-1.42255	1.88e-05	0.00361941
ENSDARG00000076873	un-named hu7912 [Source:ZFIN;Acc:ZDB-GENE-120727-20]	unm_hu7912	-1.87003	2.03e-05	0.0038624
ENSDARG00000000472	contactin 2 [Source:ZFIN;Acc:ZDB-GENE-990630-12]	cntn2	-0.845268	2.03e-05	0.0038624
ENSDARG00000098059	FKBP prolyl isomerase 3 [Source:ZFIN;Acc:ZDB-GENE-030616-419]	fkbp3	0.813209	2.11e-05	0.00397859
ENSDARG00000068082	WW domain binding protein 4 [Source:ZFIN;Acc:ZDB-GENE-050522-342]	wbp4	1.33387	2.23e-05	0.00418053
ENSDARG00000078069	ribonucleotide reductase M2 polypeptide [Source:NCBI gene;Acc:30733]	rrm2	1.62725	2.55e-05	0.00475602
ENSDARG00000104707		CU550719.2	5.7507	2.9e-05	0.00536879
ENSDARG00000075045	chemokine (C-X-C motif) ligand 18b [Source:ZFIN;Acc:ZDB-GENE-090313-165]	cxcl18b	2.41468	3.09e-05	0.00569115
ENSDARG00000032199	glypican 3 [Source:NCBI gene;Acc:387365]	gpc3	-2.21517	3.21e-05	0.00586068
ENSDARG00000094615	si:dkey-9p20.18 [Source:ZFIN;Acc:ZDB-GENE-070705-515]	si:dkey-9p20.18	3.48633	3.28e-05	0.00596128
ENSDARG00000018270	olfactomedin 1a [Source:ZFIN;Acc:ZDB-GENE-040718-194]	olfm1a	-1.10433	3.5e-05	0.00630535
ENSDARG00000094456		AL928824.1	4.07116	3.52e-05	0.00630535
ENSDARG00000110288	uncharacterized LOC101883331 [Source:NCBI gene;Acc:101883331]	CT583625.5	2.66486	3.83e-05	0.00681956
ENSDARG00000112772		CR381647.5	0.922973	3.86e-05	0.00682723
ENSDARG00000103976		BX544877.2	5.74951	4.01e-05	0.0070507
ENSDARG00000100996		BX901898.2	2.70903	4.13e-05	0.00718938
ENSDARG00000091085	leptin a [Source:ZFIN;Acc:ZDB-GENE-081001-1]	lepa	3.92126	4.14e-05	0.00718938
ENSDARG00000060637	calsyntenin 2 [Source:ZFIN;Acc:ZDB-GENE-070911-2]	clstn2	-1.37259	4.5e-05	0.00775405
ENSDARG00000115819		CT583728.24	4.24693	4.53e-05	0.00776565
ENSDARG00000086645	heparan sulfate (glucosamine) 3-O-sulfotransferase 3B1b [Source:ZFIN;Acc:ZDB-GENE-070202-5]	hs3st3b1b	-1.2278	4.94e-05	0.00841739
ENSDARG00000057468	potassium voltage-gated channel, Shaw-related subfamily, member 2 [Source:ZFIN;Acc:ZDB-GENE-070410-118]	kcnc2	-1.57234	4.97e-05	0.00841739
ENSDARG00000094197	zinc finger-like gene 1l [Source:ZFIN;Acc:ZDB-GENE-081104-493]	znfl1l	0.96972	5.09e-05	0.00856266
ENSDARG00000115518		CR293501.2	2.82018	5.23e-05	0.00875372
ENSDARG00000110428		CABZ01072614.1	3.35617	6.36e-05	0.0105786
ENSDARG00000098401	family with sequence similarity 136 member A [Source:NCBI gene;Acc:406709]	fam136a	0.816448	6.7e-05	0.0110814
ENSDARG00000075015	heme-binding protein soul5 [Source:ZFIN;Acc:ZDB-GENE-110718-2]	soul5	1.90013	6.94e-05	0.0114069
ENSDARG00000086842	death associated protein 1b [Source:ZFIN;Acc:ZDB-GENE-000511-4]	dap1b	0.826254	7.01e-05	0.0114564
ENSDARG00000115712	twinfilin actin-binding protein 1a [Source:ZFIN;Acc:ZDB-GENE-030131-4402]	twf1a	0.671539	7.13e-05	0.0115361
ENSDARG00000062797	neural EGFL like 2b [Source:ZFIN;Acc:ZDB-GENE-030131-8026]	nell2b	-0.682537	7.14e-05	0.0115361
ENSDARG00000088466	thioredoxin related transmembrane protein 3b [Source:ZFIN;Acc:ZDB-GENE-060901-5]	tmx3b	1.18224	7.52e-05	0.012067
ENSDARG00000029239	synaptotagmin IXb [Source:ZFIN;Acc:ZDB-GENE-040822-6]	syt9b	-0.78322	7.67e-05	0.0122393
ENSDARG00000073708	zgc:171551 [Source:ZFIN;Acc:ZDB-GENE-080220-8]	zgc:171551	2.76796	7.77e-05	0.0122636
ENSDARG00000113005	si:dkey-47k16.4 [Source:ZFIN;Acc:ZDB-GENE-110914-131]	si:dkey-47k16.4	3.50003	7.77e-05	0.0122636
ENSDARG00000110269	transmembrane protein 128 [Source:HGNC Symbol;Acc:HGNC:28201]	tmem107	1.45141	8.14e-05	0.0127667
ENSDARG00000017294	guanine nucleotide binding protein (G protein), alpha inhibiting activity polypeptide 2b [Source:ZFIN;Acc:ZDB-GENE-030131-5861]	gnai2b	-0.697555	8.64e-05	0.0134724
ENSDARG00000079371	leucine rich repeat containing 3Ca [Source:ZFIN;Acc:ZDB-GENE-080327-9]	lrrc3ca	-2.9438	8.74e-05	0.0135526
ENSDARG00000111013	diverse immunoglobulin domain-containing protein 1.1 [Source:ZFIN;Acc:ZDB-GENE-120305-1]	dicp1.1	2.58708	8.93e-05	0.0137804
ENSDARG00000097310	zgc:193812 [Source:ZFIN;Acc:ZDB-GENE-081022-44]	zgc:193812	1.97458	0.000101026	0.015435
ENSDARG00000094692		CR384089.1	2.95656	0.000101155	0.015435
ENSDARG00000044093	ribosomal protein L13a [Source:ZFIN;Acc:ZDB-GENE-030131-168]	rpl13a	0.555052	0.000103418	0.0156941
ENSDARG00000116751		BX537263.5	3.25198	0.000104724	0.015806
ENSDARG00000016725	growth arrest and DNA-damage-inducible, gamma b, tandem duplicate 1 [Source:ZFIN;Acc:ZDB-GENE-040426-2321]	gadd45gb.1	0.692224	0.000105737	0.0158725
ENSDARG00000101831	iroquois homeobox 1a [Source:ZFIN;Acc:ZDB-GENE-040707-1]	irx1a	-0.862208	0.000111584	0.0166602
ENSDARG00000054332	tripartite motif containing 66 [Source:ZFIN;Acc:ZDB-GENE-040724-145]	trim66	-1.54364	0.000113494	0.0168548
ENSDARG00000069423	transmembrane inner ear [Source:ZFIN;Acc:ZDB-GENE-061207-9]	tmie	-2.26509	0.000121902	0.0180071
ENSDARG00000095424	si:ch211-133n4.7 [Source:ZFIN;Acc:ZDB-GENE-060503-665]	si:ch211-133n4.7	3.5094	0.00012296	0.0180674
ENSDARG00000098528	reticulon 4 receptor-like 1b [Source:ZFIN;Acc:ZDB-GENE-040310-3]	rtn4rl1b	-1.54869	0.000128227	0.0186812
ENSDARG00000034043	iroquois homeobox 5a [Source:ZFIN;Acc:ZDB-GENE-010716-2]	irx5a	-0.746732	0.000128483	0.0186812
ENSDARG00000003403	teneurin transmembrane protein 1 [Source:ZFIN;Acc:ZDB-GENE-060531-26]	tenm1	-0.987414	0.000132049	0.0190996
ENSDARG00000051852	potassium voltage-gated channel, Shaw-related subfamily, member 1a [Source:ZFIN;Acc:ZDB-GENE-061220-10]	kcnc1a	-1.04606	0.000133123	0.0191552
ENSDARG00000095743	SRY-box transcription factor 11b [Source:ZFIN;Acc:ZDB-GENE-980526-466]	sox11b	0.719211	0.000136967	0.0195243
ENSDARG00000104254	copine IVb [Source:ZFIN;Acc:ZDB-GENE-060503-926]	cpne4b	-1.94364	0.000137094	0.0195243
ENSDARG00000102308	tetratricopeptide repeat domain 39C [Source:NCBI gene;Acc:553591]	ttc39c	-0.815593	0.000139226	0.0197267
ENSDARG00000096005		CT027801.1	4.20211	0.000145311	0.0204308
ENSDARG00000089795	SERTA domain containing 4 [Source:ZFIN;Acc:ZDB-GENE-090313-199]	sertad4	-0.864589	0.000145666	0.0204308
ENSDARG00000030490	spectrin, beta, erythrocytic [Source:ZFIN;Acc:ZDB-GENE-000906-1]	sptb	-0.814464	0.000156122	0.0217872
ENSDARG00000027828	glutamate receptor, ionotropic, N-methyl D-aspartate 1a [Source:ZFIN;Acc:ZDB-GENE-051202-1]	grin1a	-0.652812	0.000163385	0.0226869
ENSDARG00000062447	HECT, C2 and WW domain containing E3 ubiquitin protein ligase 2a [Source:ZFIN;Acc:ZDB-GENE-090311-22]	hecw2a	-1.44913	0.000168063	0.0232203
ENSDARG00000096271	membrane-associated ring finger (C3HC4) 7 [Source:ZFIN;Acc:ZDB-GENE-080204-121]	44262	1.27341	0.000168935	0.0232253
ENSDARG00000117813		CABZ01092942.1	0.82854	0.000177036	0.0242191
ENSDARG00000114307	uncharacterized LOC795083 [Source:NCBI gene;Acc:795083]	CR354612.1	6.40739	0.000184278	0.0250862
ENSDARG00000104106		CABZ01087953.1	4.1074	0.00019282	0.0261208
ENSDARG00000086463	kelch-like family member 13 [Source:ZFIN;Acc:ZDB-GENE-030131-2671]	klhl13	3.36148	0.000193759	0.0261208
ENSDARG00000092387	zgc:193742 [Source:ZFIN;Acc:ZDB-GENE-081022-37]	zgc:193742	1.74773	0.000204948	0.0274957
ENSDARG00000095051	si:ch211-236l14.1 [Source:ZFIN;Acc:ZDB-GENE-081104-492]	si:ch211-236l14.1	5.77164	0.000206982	0.027612
ENSDARG00000115511		CU468041.2	-1.82902	0.000207803	0.027612
ENSDARG00000055653	nucleotide binding protein 2 (MinD homolog, E. coli) [Source:NCBI gene;Acc:641290]	nubp2	1.72144	0.000209331	0.0276825
ENSDARG00000115799	histone 1, H4, like [Source:ZFIN;Acc:ZDB-GENE-070927-10]	hist1h4l	4.57251	0.000210447	0.0276982
ENSDARG00000036070	zinc ribbon domain containing 1 [Source:ZFIN;Acc:ZDB-GENE-050320-131]	znrd1	1.85575	0.000213034	0.0279065
ENSDARG00000102258	si:dkey-1b17.1 [Source:ZFIN;Acc:ZDB-GENE-050208-688]	si:dkey-1b17.1	1.61118	0.000223165	0.0290211
ENSDARG00000037713	PEST proteolytic signal containing nuclear protein [Source:ZFIN;Acc:ZDB-GENE-041010-130]	pcnp	0.687034	0.000223633	0.0290211
ENSDARG00000061149	neuritin 1-like b [Source:ZFIN;Acc:ZDB-GENE-081022-27]	nrn1lb	0.941788	0.000231644	0.0299209
ENSDARG00000103404	ubiquitin carboxyl-terminal hydrolase L5 [Source:ZFIN;Acc:ZDB-GENE-040426-2051]	uchl5	-0.693992	0.000234136	0.0301028
ENSDARG00000100651	phosducin like 3 [Source:HGNC Symbol;Acc:HGNC:28860]	PDCL3	0.815178	0.000251161	0.0321428
ENSDARG00000037350	ribosomal protein L9 [Source:ZFIN;Acc:ZDB-GENE-030131-8646]	rpl9	1.06327	0.000252419	0.0321556
ENSDARG00000099787	enoyl CoA hydratase domain containing 3 [Source:NCBI gene;Acc:780842]	echdc3	1.77366	0.000259527	0.0328144
ENSDARG00000098408	starch binding domain 1 [Source:ZFIN;Acc:ZDB-GENE-120817-2]	stbd1	-2.41927	0.000260017	0.0328144
ENSDARG00000094738	lipoxygenase homology domains 1a [Source:ZFIN;Acc:ZDB-GENE-091112-20]	loxhd1a	-2.08504	0.000261135	0.0328144
ENSDARG00000099854	5-hydroxytryptamine receptor 7 [Source:NCBI gene;Acc:100536080]	HTR7	-2.26293	0.000266337	0.0330485
ENSDARG00000040118	zgc:113232 [Source:ZFIN;Acc:ZDB-GENE-050327-86]	zgc:113232	4.19726	0.00026659	0.0330485
ENSDARG00000075960	cadherin 24, type 2a [Source:ZFIN;Acc:ZDB-GENE-090312-96]	cdh24a	-1.29186	0.000266751	0.0330485
ENSDARG00000042630	heme binding protein 2 [Source:ZFIN;Acc:ZDB-GENE-040426-914]	hebp2	1.22357	0.000267759	0.0330485
ENSDARG00000069282	BCL2 binding component 3 [Source:ZFIN;Acc:ZDB-GENE-070119-4]	bbc3	0.945433	0.000278057	0.0341677
ENSDARG00000094135		BX936305.1	4.25626	0.000282564	0.0345686
ENSDARG00000078755	phospholipid phosphatase related 4b [Source:ZFIN;Acc:ZDB-GENE-091118-37]	plppr4b	-0.852483	0.000288563	0.0351477
ENSDARG00000053130	Purkinje cell protein 4a [Source:ZFIN;Acc:ZDB-GENE-031118-105]	pcp4a	-0.878633	0.000300147	0.036399
ENSDARG00000079376	zgc:174153 [Source:ZFIN;Acc:ZDB-GENE-080215-7]	zgc:174153	3.90363	0.000317533	0.0382273
ENSDARG00000029795	peroxiredoxin like 2B [Source:NCBI gene;Acc:406605]	prxl2b	0.85556	0.000317976	0.0382273
ENSDARG00000094737	si:ch211-12e13.12 [Source:ZFIN;Acc:ZDB-GENE-070424-121]	si:ch211-12e13.12	-1.39274	0.000323983	0.0387816
ENSDARG00000112940	gastrula zinc finger protein XlCGF8.2DB-like [Source:NCBI gene;Acc:108184006]	CT573263.1	2.52373	0.00032621	0.0388806
ENSDARG00000100188	RNA binding protein with serine rich domain 1 [Source:HGNC Symbol;Acc:HGNC:10080]	rnps1	2.10282	0.000346335	0.0411029
ENSDARG00000116586	ferritin, heavy polypeptide-like 27 [Source:ZFIN;Acc:ZDB-GENE-040718-72]	fthl27	2.20391	0.000352535	0.0416606
ENSDARG00000109743		BX324227.2	5.25988	0.000367102	0.0431983
ENSDARG00000110787	zinc finger protein 1102 [Source:ZFIN;Acc:ZDB-GENE-071004-71]	znf1102	1.98474	0.000371208	0.0434971
ENSDARG00000087061	si:ch211-71k14.1 [Source:ZFIN;Acc:ZDB-GENE-110411-283]	si:ch211-71k14.1	4.03039	0.000384152	0.0448248
ENSDARG00000101829	si:dkey-16b10.2 [Source:ZFIN;Acc:ZDB-GENE-120703-32]	si:dkey-16b10.2	2.79118	0.000389278	0.0452328
ENSDARG00000104442	apoptosis-associated tyrosine kinase b [Source:ZFIN;Acc:ZDB-GENE-100812-6]	aatkb	-0.76666	0.00039604	0.0458268
ENSDARG00000095687	si:dkey-84o3.3 [Source:ZFIN;Acc:ZDB-GENE-091113-21]	si:dkey-84o3.3	2.84653	0.000398054	0.0458687
ENSDARG00000105570	crestin [Source:ZFIN;Acc:ZDB-GENE-000208-13]	crestin	1.22213	0.000405951	0.0465854
ENSDARG00000017338	kinase D-interacting substrate 220b [Source:NCBI gene;Acc:335881]	kidins220b	-0.534852	0.000417083	0.0475556
ENSDARG00000017532	kinesin family member 25 [Source:ZFIN;Acc:ZDB-GENE-041001-167]	kif25	0.670332	0.00041783	0.0475556
ENSDARG00000096843	zgc:193593 [Source:ZFIN;Acc:ZDB-GENE-080723-21]	zgc:193593	5.25692	0.000427409	0.0484066
ENSDARG00000052223	recoverin a [Source:ZFIN;Acc:ZDB-GENE-050913-106]	rcvrna	0.571261	0.000429052	0.0484066
ENSDARG00000095549	si:dkeyp-106c3.2 [Source:ZFIN;Acc:ZDB-GENE-070705-527]	si:dkeyp-106c3.2	4.16941	0.000430537	0.0484066
ENSDARG00000115161		CABZ01069162.1	-3.8933	0.00044539	0.0498747
ENSDARG00000096784		CU929359.2	1.67029	0.000452542	0.050472
ENSDARG00000095651	H6 family homeobox 1 [Source:ZFIN;Acc:ZDB-GENE-080204-54]	hmx1	-0.572891	0.000470926	0.0523124
ENSDARG00000105529	VGF nerve growth factor inducible [Source:ZFIN;Acc:ZDB-GENE-121009-2]	vgf	0.630804	0.000492906	0.0545359
ENSDARG00000104773	JunB proto-oncogene, AP-1 transcription factor subunit b [Source:ZFIN;Acc:ZDB-GENE-040426-2666]	junbb	0.684125	0.000536276	0.0590989
ENSDARG00000054911	thymosin, beta [Source:NCBI gene;Acc:402820]	tmsb	0.99155	0.000545597	0.0598884
ENSDARG00000094836	si:ch211-195b15.8 [Source:ZFIN;Acc:ZDB-GENE-131127-627]	si:ch211-195b15.8	0.576165	0.00056257	0.0615084
ENSDARG00000033382	galectin-related inter-fiber protein [Source:NCBI gene;Acc:445036]	grifin	-0.873278	0.00056886	0.0619522
ENSDARG00000017742	glutamate receptor, metabotropic 6a [Source:ZFIN;Acc:ZDB-GENE-060208-1]	grm6a	-1.57303	0.000571918	0.062042
ENSDARG00000111515	uncharacterized LOC101884052 [Source:NCBI gene;Acc:101884052]	CABZ01061498.1	-3.17008	0.000574834	0.0621157
ENSDARG00000005775	sodium channel, voltage gated, type VIII, alpha subunit a [Source:ZFIN;Acc:ZDB-GENE-000828-1]	scn8aa	-0.681704	0.000581009	0.0625396
ENSDARG00000098983		CABZ01112656.1	0.625195	0.00063158	0.0672811
ENSDARG00000068006	glucokinase (hexokinase 4) [Source:ZFIN;Acc:ZDB-GENE-060825-204]	gck	3.41544	0.000631815	0.0672811
ENSDARG00000013787	guanylate cyclase 1 soluble subunit alpha 1 [Source:ZFIN;Acc:ZDB-GENE-050417-230]	gucy1a1	-1.63599	0.000632328	0.0672811
ENSDARG00000014181	forkhead box P1b [Source:NCBI gene;Acc:569047]	foxp1b	-0.706211	0.000655991	0.0695111
ENSDARG00000094538		CT027623.1	4.52651	0.000658291	0.0695111
ENSDARG00000060253	si:ch211-216b21.2 [Source:ZFIN;Acc:ZDB-GENE-130603-96]	si:ch211-216b21.2	-1.61853	0.000662411	0.0696811
ENSDARG00000073704	si:dkeyp-72g9.4 [Source:ZFIN;Acc:ZDB-GENE-031204-23]	si:dkeyp-72g9.4	-1.15963	0.000676021	0.0707029
ENSDARG00000094312	NADH:ubiquinone oxidoreductase subunit A9b [Source:ZFIN;Acc:ZDB-GENE-091116-31]	ndufa9b	-1.17288	0.000677216	0.0707029
ENSDARG00000074930	si:ch1073-70f20.1 [Source:ZFIN;Acc:ZDB-GENE-081104-94]	si:ch1073-70f20.1	3.15828	0.000685503	0.0713
ENSDARG00000043697	neurofilament, medium polypeptide b [Source:ZFIN;Acc:ZDB-GENE-070103-4]	nefmb	-1.86942	0.000691049	0.0716086
ENSDARG00000088882	si:ch211-149b19.2 [Source:ZFIN;Acc:ZDB-GENE-110411-60]	si:ch211-149b19.2	-1.04807	0.000698116	0.0720721
ENSDARG00000093453	AT hook, DNA binding motif, containing 1 [Source:ZFIN;Acc:ZDB-GENE-060503-584]	ahdc1	-1.18878	0.000723819	0.0744488
ENSDARG00000044155	v-maf avian musculoaponeurotic fibrosarcoma oncogene homolog Aa [Source:NCBI gene;Acc:100000492]	mafaa	-0.922058	0.000732348	0.0750481
ENSDARG00000078901	ankyrin repeat and sterile alpha motif domain containing 1Ab [Source:ZFIN;Acc:ZDB-GENE-110107-1]	anks1ab	-0.747464	0.000752375	0.076817
ENSDARG00000033296	G protein-coupled receptor 37b [Source:ZFIN;Acc:ZDB-GENE-041210-264]	gpr37b	-0.753574	0.000763041	0.0776205
ENSDARG00000037914	zinc finger-like gene 1 [Source:ZFIN;Acc:ZDB-GENE-030828-6]	znfl1	2.5538	0.000768068	0.0778467
ENSDARG00000059534	si:ch211-146m13.3 [Source:ZFIN;Acc:ZDB-GENE-110408-64]	JPH3	-0.857737	0.000780526	0.0788218
ENSDARG00000113141	zinc finger protein 1018 [Source:ZFIN;Acc:ZDB-GENE-110913-173]	znf1018	2.39959	0.000798695	0.0803644
ENSDARG00000093574	si:ch73-256j6.4 [Source:ZFIN;Acc:ZDB-GENE-030131-3779]	si:ch73-256j6.4	-5.11276	0.000801984	0.0804039
ENSDARG00000031776	ferritin, heavy polypeptide-like 27 [Source:ZFIN;Acc:ZDB-GENE-040718-72]	fthl27	0.687672	0.000810819	0.0809973
ENSDARG00000102185	si:ch211-199f5.1 [Source:ZFIN;Acc:ZDB-GENE-120215-215]	PCDH8	-0.787638	0.000815018	0.081125
ENSDARG00000099002	cAMP responsive element binding protein 5a [Source:ZFIN;Acc:ZDB-GENE-120827-2]	creb5a	1.43085	0.000825975	0.081922
ENSDARG00000071678	ATCAY kinesin light chain interacting caytaxin a [Source:ZFIN;Acc:ZDB-GENE-070705-185]	atcaya	-1.24296	0.000841551	0.0831698
ENSDARG00000100991	cholinergic receptor, nicotinic, alpha 3 [Source:ZFIN;Acc:ZDB-GENE-070822-1]	chrna3	-1.90237	0.000847065	0.0834179
ENSDARG00000070138	si:dkey-84o3.3 [Source:ZFIN;Acc:ZDB-GENE-091113-21]	si:dkey-84o3.3	3.23086	0.00085127	0.0835357
ENSDARG00000079762	si:dkey-253d23.4 [Source:ZFIN;Acc:ZDB-GENE-050208-730]	si:dkey-253d23.4	1.22215	0.000857915	0.0838914
ENSDARG00000088708	nerve growth factor receptor a (TNFR superfamily, member 16) [Source:ZFIN;Acc:ZDB-GENE-050928-1]	ngfra	-0.849447	0.000872918	0.0847344
ENSDARG00000105435	calmodulin binding transcription activator 1 [Source:ZFIN;Acc:ZDB-GENE-160114-49]	camta1	2.29425	0.000873612	0.0847344
ENSDARG00000097973	si:ch1073-190k2.1 [Source:ZFIN;Acc:ZDB-GENE-131127-449]	si:ch1073-190k2.1	1.89733	0.000877903	0.0847344
ENSDARG00000041776	N-deacetylase/N-sulfotransferase (heparan glucosaminyl) 3 [Source:ZFIN;Acc:ZDB-GENE-090312-199]	ndst3	-1.20323	0.000880467	0.0847344
ENSDARG00000076030	calcium channel, voltage-dependent, beta 3b [Source:ZFIN;Acc:ZDB-GENE-090127-1]	cacnb3b	-1.24601	0.000881792	0.0847344
ENSDARG00000117655		CABZ01059914.1	3.39761	0.000890913	0.0851606
ENSDARG00000103057	zinc finger homeobox 3 [Source:ZFIN;Acc:ZDB-GENE-030131-7577]	zfhx3	-0.489779	0.00089236	0.0851606
ENSDARG00000101087	si:dkeyp-80d11.1 [Source:ZFIN;Acc:ZDB-GENE-030131-4126]	si:dkeyp-80d11.1	1.7432	0.000909024	0.0864538
ENSDARG00000032131	dopamine receptor D3 [Source:ZFIN;Acc:ZDB-GENE-021119-1]	drd3	-2.02953	0.000946564	0.0897168
ENSDARG00000091234	si:ch73-335l21.4 [Source:ZFIN;Acc:ZDB-GENE-160728-105]	si:ch73-335l21.4	1.45163	0.000955457	0.0902517
ENSDARG00000112275		AL935186.7	3.60783	0.000967539	0.0909228
ENSDARG00000056954	si:dkeyp-38g8.5 [Source:ZFIN;Acc:ZDB-GENE-081104-62]	si:dkeyp-38g8.5	1.63251	0.00096911	0.0909228
ENSDARG00000019096	myosin, light chain 7, regulatory [Source:ZFIN;Acc:ZDB-GENE-991019-3]	myl7	-7.27062	0.000985965	0.0917687
ENSDARG00000099201		BX908731.1	3.30905	0.000993705	0.0917687
ENSDARG00000034420	iroquois homeobox 6a [Source:ZFIN;Acc:ZDB-GENE-040712-5]	irx6a	0.574846	0.000995546	0.0917687
ENSDARG00000075189	contactin associated protein-like 5b [Source:ZFIN;Acc:ZDB-GENE-070705-209]	cntnap5b	-1.08279	0.000995632	0.0917687
ENSDARG00000034522	RAB6B, member RAS oncogene family a [Source:ZFIN;Acc:ZDB-GENE-050809-136]	rab6ba	-0.859704	0.000997601	0.0917687
ENSDARG00000005783	neurocan b [Source:ZFIN;Acc:ZDB-GENE-050208-586]	ncanb	-1.00737	0.000997952	0.0917687
ENSDARG00000074746	potassium voltage-gated channel, Shal-related subfamily, member 1 [Source:ZFIN;Acc:ZDB-GENE-081105-40]	kcnd1	-1.39205	0.00101331	0.092873
ENSDARG00000052764	cholinergic receptor, nicotinic, beta polypeptide 3a [Source:ZFIN;Acc:ZDB-GENE-040108-1]	chrnb3a	-0.682695	0.00101926	0.0931116
ENSDARG00000058730	retinol dehydrogenase 10a [Source:NCBI gene;Acc:562840]	rdh10a	-0.551281	0.00102497	0.0933263
ENSDARG00000100464	si:dkey-193i10.1 [Source:ZFIN;Acc:ZDB-GENE-070705-341]	si:dkey-193i10.1	2.41667	0.00103263	0.0937166
ENSDARG00000116717	si:dkey-82i20.5 [Source:ZFIN;Acc:ZDB-GENE-110914-101]	si:dkey-82i20.5	3.15158	0.00103635	0.0937471
ENSDARG00000099151	WW domain binding protein 11 [Source:NCBI gene;Acc:402950]	wbp11	0.730882	0.00107354	0.0967959
ENSDARG00000114805	uncharacterized LOC100150236 [Source:NCBI gene;Acc:100150236]	CU469530.2	3.36305	0.00109423	0.0982113
ENSDARG00000035357	guanine nucleotide binding protein (G protein), beta polypeptide 2 [Source:ZFIN;Acc:ZDB-GENE-050320-65]	gnb2	-0.573371	0.0010963	0.0982113
ENSDARG00000090481	trafficking regulator of GLUT4 (SLC2A4) 1a [Source:ZFIN;Acc:ZDB-GENE-131121-306]	trarg1a	-1.18165	0.00112514	0.10047
ENSDARG00000070730	gamma-aminobutyric acid (GABA) A receptor, alpha 5 [Source:ZFIN;Acc:ZDB-GENE-081104-30]	gabra5	-1.39958	0.00113511	0.101036
ENSDARG00000039063	piggyBac transposable element-derived protein 4-like [Source:NCBI gene;Acc:100330143]	CR847936.1	1.14084	0.00115801	0.102745
ENSDARG00000042094	eukaryotic translation elongation factor 2a, tandem duplicate 1 [Source:ZFIN;Acc:ZDB-GENE-050522-500]	eef2a.1	-0.863948	0.00118115	0.104464
ENSDARG00000096367	formin binding protein 1b [Source:ZFIN;Acc:ZDB-GENE-091117-6]	fnbp1b	1.83564	0.00120918	0.106076
ENSDARG00000062056	ELMO/CED-12 domain containing 1 [Source:ZFIN;Acc:ZDB-GENE-070112-262]	elmod1	-0.586601	0.00120952	0.106076
ENSDARG00000006868	thyrotropin-releasing hormone [Source:NCBI gene;Acc:266721]	trh	0.783804	0.00121146	0.106076
ENSDARG00000079317	DLC1 Rho GTPase activating protein [Source:ZFIN;Acc:ZDB-GENE-130206-12]	dlc1	-0.951009	0.00121466	0.106076
ENSDARG00000116353	low density lipoprotein receptor-related protein 4 [Source:ZFIN;Acc:ZDB-GENE-130129-1]	lrp4	-0.908583	0.00124617	0.108487
ENSDARG00000101425	si:dkey-1b17.5 [Source:ZFIN;Acc:ZDB-GENE-050208-704]	si:dkey-1b17.5	1.72439	0.00127194	0.110385
ENSDARG00000044387	claudin 2 [Source:ZFIN;Acc:ZDB-GENE-040912-26]	cldn2	0.877204	0.00130745	0.113113
ENSDARG00000087993	BCL2 associated agonist of cell death a [Source:ZFIN;Acc:ZDB-GENE-030131-2378]	bada	0.682893	0.00132701	0.114448
ENSDARG00000004988	protein phosphatase 3, catalytic subunit, alpha isozyme [Source:ZFIN;Acc:ZDB-GENE-091113-24]	ppp3ca	-0.625087	0.00135648	0.116628
ENSDARG00000112862		CU182107.2	4.87284	0.00137959	0.118248
ENSDARG00000007941	H6 family homeobox 4 [Source:ZFIN;Acc:ZDB-GENE-060825-142]	hmx4	-0.573897	0.00140211	0.119809
ENSDARG00000059897	neurotrophic tyrosine kinase, receptor, type 2a [Source:ZFIN;Acc:ZDB-GENE-010126-1]	ntrk2a	-0.9457	0.00140722	0.119877
ENSDARG00000099995	amyloid beta (A4) precursor protein-binding, family B, member 2b [Source:ZFIN;Acc:ZDB-GENE-090313-73]	apbb2b	-0.775055	0.00141427	0.120109
ENSDARG00000099317	si:ch211-255f4.9 [Source:ZFIN;Acc:ZDB-GENE-050208-790]	si:ch211-255f4.9	1.84987	0.00144111	0.122016
ENSDARG00000008454	cytoplasmic polyadenylation element binding protein 1b [Source:NCBI gene;Acc:30702]	cpeb1b	-1.48051	0.00145674	0.122964
ENSDARG00000030832	otoferlin a [Source:NCBI gene;Acc:557476]	otofa	-0.687542	0.00146845	0.123577
ENSDARG00000101347		CABZ01068251.1	0.635719	0.00149057	0.125059
ENSDARG00000037256	si:ch211-145b13.5 [Source:ZFIN;Acc:ZDB-GENE-090313-35]	si:ch211-145b13.5	-2.33832	0.00153014	0.127992
ENSDARG00000078817	ring finger protein 165b [Source:ZFIN;Acc:ZDB-GENE-081104-369]	rnf165b	0.919474	0.00157018	0.13036
ENSDARG00000042656	neuritin 1b [Source:ZFIN;Acc:ZDB-GENE-041010-98]	nrn1b	-1.9337	0.00157151	0.13036
ENSDARG00000091459	gamma-aminobutyric acid type A receptor alpha2 subunit a [Source:ZFIN;Acc:ZDB-GENE-141216-16]	gabra2a	-1.33518	0.00157252	0.13036
ENSDARG00000109235		CABZ01103862.1	1.31512	0.00160807	0.132558
ENSDARG00000096073	collagen, type XIX, alpha 1 [Source:ZFIN;Acc:ZDB-GENE-090312-196]	col19a1	-3.54392	0.00161137	0.132558
ENSDARG00000074670	megakaryocyte-associated tyrosine kinase [Source:ZFIN;Acc:ZDB-GENE-070705-183]	matk	2.21209	0.00161667	0.132558
ENSDARG00000010132	dachshund a [Source:ZFIN;Acc:ZDB-GENE-020402-3]	dacha	-0.601859	0.00162026	0.132558
ENSDARG00000086271	acylphosphatase 2, muscle type [Source:ZFIN;Acc:ZDB-GENE-130530-886]	acyp2	2.16263	0.00162291	0.132558
ENSDARG00000087599	si:dkey-237h12.3 [Source:ZFIN;Acc:ZDB-GENE-081027-3]		-0.659623	0.0016645	0.135557
ENSDARG00000037337	cannabinoid receptor interacting protein 1b [Source:ZFIN;Acc:ZDB-GENE-080722-33]	cnrip1b	0.53932	0.00169311	0.137483
ENSDARG00000062448	SKI family transcriptional corepressor 1b [Source:NCBI gene;Acc:567457]	skor1b	-1.17019	0.00170687	0.138197
ENSDARG00000007795	cystatin C (amyloid angiopathy and cerebral hemorrhage) [Source:ZFIN;Acc:ZDB-GENE-030131-373]	cst3	0.513819	0.00175606	0.141766
ENSDARG00000112572		CR293507.1	1.12893	0.00176649	0.142093
ENSDARG00000069739	fibronectin type III domain containing 5a [Source:ZFIN;Acc:ZDB-GENE-061207-40]	fndc5a	-1.79145	0.00177035	0.142093
ENSDARG00000007264		nipsnap2	0.575457	0.0018085	0.144737
ENSDARG00000076780	acyl-CoA dehydrogenase short/branched chain [Source:ZFIN;Acc:ZDB-GENE-070410-109]	acadsb	0.63596	0.00182917	0.145971
ENSDARG00000090873	chemokine (C-C motif) ligand 34a, duplicate 4 [Source:ZFIN;Acc:ZDB-GENE-070912-32]	ccl34a.4	1.65224	0.00185581	0.147673
ENSDARG00000016301	zgc:65894 [Source:ZFIN;Acc:ZDB-GENE-030131-7741]	zgc:65894	-0.520839	0.00189395	0.150277
ENSDARG00000044954	slit homolog 1a (Drosophila) [Source:ZFIN;Acc:ZDB-GENE-030722-3]	slit1a	-0.86345	0.00194469	0.153863
ENSDARG00000100152	chromosome 25 C12orf75 homolog [Source:NCBI gene;Acc:100535414]	CABZ01067761.1	1.41317	0.00199434	0.157343
ENSDARG00000111269		CABZ01087224.1	3.89729	0.00201631	0.158626
ENSDARG00000095940	si:dkey-19a16.12 [Source:ZFIN;Acc:ZDB-GENE-110408-26]	si:dkey-19a16.12	-6.03736	0.00204578	0.160489
ENSDARG00000068478	glutathione peroxidase 4a [Source:ZFIN;Acc:ZDB-GENE-030410-2]	gpx4a	-1.09569	0.00206706	0.161702
ENSDARG00000100229	si:ch211-238e22.5 [Source:ZFIN;Acc:ZDB-GENE-041210-374]	si:ch211-238e22.5	2.93701	0.00207534	0.161894
ENSDARG00000060368	synapsin I [Source:ZFIN;Acc:ZDB-GENE-081105-93]	syn1	-0.605819	0.00208909	0.16251
ENSDARG00000099061	zinc finger protein 1154 [Source:ZFIN;Acc:ZDB-GENE-080218-28]	znf1154	1.6671	0.00213273	0.165441
ENSDARG00000062621	SATB homeobox 1b [Source:ZFIN;Acc:ZDB-GENE-030131-7105]	satb1b	-0.86725	0.00224126	0.173376
ENSDARG00000022971	eph receptor A6 [Source:ZFIN;Acc:ZDB-GENE-090311-43]	epha6	-0.97313	0.00225187	0.173713
ENSDARG00000024693	LysM, putative peptidoglycan-binding, domain containing 3 [Source:NCBI gene;Acc:415194]	lysmd3	1.17642	0.00227107	0.174709
ENSDARG00000004588	SRY-box transcription factor 4a [Source:ZFIN;Acc:ZDB-GENE-030131-8290]	sox4a	0.466384	0.00228932	0.175626
ENSDARG00000115778	cholinergic receptor, nicotinic, beta 5a [Source:ZFIN;Acc:ZDB-GENE-090312-169]	chrnb5a	-1.06074	0.00230774	0.176552
ENSDARG00000098320	glutamate receptor, metabotropic 1b [Source:ZFIN;Acc:ZDB-GENE-090821-3]	grm1b	-2.13646	0.00231433	0.176569
ENSDARG00000114880		CU467856.3	2.99243	0.00234825	0.178666
ENSDARG00000111190		CR450686.5	-5.09656	0.00236909	0.17976
ENSDARG00000038465	stathmin-like 3 [Source:ZFIN;Acc:ZDB-GENE-081124-2]	stmn3	-1.65149	0.00238224	0.180265
ENSDARG00000027602	leucine rich repeat and fibronectin type III domain containing 1 [Source:NCBI gene;Acc:393587]	lrfn1	-1.465	0.00239147	0.180471
ENSDARG00000100384		CT990567.1	2.44402	0.00239891	0.180542
ENSDARG00000029146	low density lipoprotein receptor-related protein 1Ab [Source:ZFIN;Acc:ZDB-GENE-030131-7126]	lrp1ab	-0.485885	0.00240577	0.180569
ENSDARG00000097608		CU929312.1	3.57443	0.00241238	0.180578
ENSDARG00000105468	zgc:112234 [Source:NCBI gene;Acc:554097]	zgc:112234	2.73489	0.00242126	0.180755
ENSDARG00000115582		AL928685.5	1.48264	0.00251864	0.187521
ENSDARG00000093117	si:dkey-266m15.7 [Source:ZFIN;Acc:ZDB-GENE-070705-444]	si:dkey-266m15.7	1.31166	0.00255014	0.189358
ENSDARG00000112040		CR774179.5	1.71616	0.00261581	0.193649
ENSDARG00000075273	thrombospondin, type I, domain containing 1 [Source:ZFIN;Acc:ZDB-GENE-100105-3]	thsd1	5.16017	0.00262415	0.193649
ENSDARG00000093137		BX294189.1	3.79938	0.00262885	0.193649
ENSDARG00000079267	fermitin family member 3a [Source:ZFIN;Acc:ZDB-GENE-081031-46]	fermt3a	1.60854	0.00264394	0.194246
ENSDARG00000038508	cholinergic receptor, nicotinic, beta 3b (neuronal) [Source:ZFIN;Acc:ZDB-GENE-030102-4]	chrnb3b	-1.62357	0.00267464	0.195982
ENSDARG00000093768	proline rich 18 [Source:ZFIN;Acc:ZDB-GENE-081107-6]	prr18	0.462051	0.00269088	0.196654
ENSDARG00000018032	sodium channel, voltage gated, type VIII, alpha subunit b [Source:ZFIN;Acc:ZDB-GENE-060906-2]	scn8ab	-1.03737	0.00274405	0.200013
ENSDARG00000097528	si:dkey-7j14.5 [Source:ZFIN;Acc:ZDB-GENE-030131-8110]	si:dkey-7j14.5	-1.54073	0.00277935	0.202056
ENSDARG00000002509	zgc:153911 [Source:ZFIN;Acc:ZDB-GENE-061013-174]	zgc:153911	1.6832	0.00280819	0.203619
ENSDARG00000110035	histone 1, H4, like [Source:ZFIN;Acc:ZDB-GENE-070927-10]	hist1h4l	3.4717	0.00290836	0.209509
ENSDARG00000100012		CR855860.1	-1.38006	0.00291089	0.209509
ENSDARG00000075806	kirre like nephrin family adhesion molecule 3a [Source:ZFIN;Acc:ZDB-GENE-091117-44]	kirrel3a	-0.909284	0.00291204	0.209509
ENSDARG00000020609	synaptosome associated protein 25a [Source:NCBI gene;Acc:30712]	snap25a	-0.498153	0.00297446	0.213383
ENSDARG00000056101	potassium voltage-gated channel, Shal-related subfamily, member 3 [Source:ZFIN;Acc:ZDB-GENE-030131-5626]	kcnd3	-1.10419	0.00298126	0.213383
ENSDARG00000058200	phosphatidylinositol-specific phospholipase C, X domain containing 2 [Source:ZFIN;Acc:ZDB-GENE-091204-217]	plcxd2	1.17598	0.00305289	0.217948
ENSDARG00000044457	growth factor independent 1A transcription repressor b [Source:ZFIN;Acc:ZDB-GENE-040116-8]	gfi1ab	-1.14156	0.00308959	0.220003
ENSDARG00000113543		CU633775.2	1.05804	0.00314115	0.223102
ENSDARG00000112840	histone cluster 1 H2A family member 10 [Source:ZFIN;Acc:ZDB-GENE-131127-92]	hist1h2a10	3.55572	0.00315154	0.223269
ENSDARG00000004150	glutamate receptor, metabotropic 2a [Source:ZFIN;Acc:ZDB-GENE-030131-8097]	grm2a	-1.10454	0.00317809	0.224577
ENSDARG00000117200		BX119314.2	2.80569	0.00327354	0.230372
ENSDARG00000007149	L1 cell adhesion molecule, paralog a [Source:NCBI gene;Acc:30634]	l1cama	-0.759139	0.00327669	0.230372
ENSDARG00000059349	homer scaffold protein 2 [Source:ZFIN;Acc:ZDB-GENE-050522-417]	homer2	0.715119	0.00335429	0.235232
ENSDARG00000096401		CU570787.1	2.69225	0.00337935	0.236393
ENSDARG00000079782	myosin heavy chain 7-like [Source:ZFIN;Acc:ZDB-GENE-061027-393]	myh7l	-2.98451	0.00338875	0.236399
ENSDARG00000109319	zinc finger protein 1030 [Source:ZFIN;Acc:ZDB-GENE-110913-176]	znf1030	1.79257	0.00339646	0.236399
ENSDARG00000059294	macrophage receptor with collagenous structure [Source:ZFIN;Acc:ZDB-GENE-120514-2]	marco	1.75894	0.00343845	0.238723
ENSDARG00000004789	low density lipoprotein receptor-related protein 1Ba [Source:ZFIN;Acc:ZDB-GENE-050208-608]	lrp1ba	-1.40366	0.00349059	0.241738
ENSDARG00000117413		CABZ01057364.1	1.53475	0.00353167	0.24312
ENSDARG00000097166		BX936386.1	4.64125	0.00353491	0.24312
ENSDARG00000014053	olfactomedin 1b [Source:ZFIN;Acc:ZDB-GENE-040801-228]	olfm1b	-0.576095	0.00353681	0.24312
ENSDARG00000104227	NOP10 ribonucleoprotein homolog (yeast) [Source:NCBI gene;Acc:445391]	nop10	0.671288	0.00355955	0.243477
ENSDARG00000099185	chitinase, acidic.2 [Source:ZFIN;Acc:ZDB-GENE-040426-2014]	chia.2	-2.52749	0.00356108	0.243477
ENSDARG00000105162		CR293509.1	1.60757	0.0035683	0.243477
ENSDARG00000055216	tubulin, alpha 1c [Source:ZFIN;Acc:ZDB-GENE-061114-1]	tuba1c	0.463404	0.00359561	0.24474
ENSDARG00000075126	si:dkey-84j12.1 [Source:ZFIN;Acc:ZDB-GENE-060526-342]	TMEM8B	-0.836266	0.00366711	0.248242
ENSDARG00000109869	zgc:174719 [Source:ZFIN;Acc:ZDB-GENE-080213-13]	zgc:174719	1.88031	0.00367243	0.248242
ENSDARG00000093977	si:ch211-220f16.1 [Source:ZFIN;Acc:ZDB-GENE-070912-198]	si:ch211-220f16.1	2.1241	0.00367388	0.248242
ENSDARG00000088039		CU929391.1	1.51092	0.00369253	0.248896
ENSDARG00000097422		CU929360.2	1.9378	0.00373687	0.250573
ENSDARG00000116743	RNA binding protein S1, serine-rich domain [Source:NCBI gene;Acc:327020]	rnps1	0.93854	0.00373883	0.250573
ENSDARG00000077569	leucine rich repeat neuronal 3a [Source:ZFIN;Acc:ZDB-GENE-061220-7]	lrrn3a	-0.819085	0.00374448	0.250573
ENSDARG00000039269	arginase 2 [Source:ZFIN;Acc:ZDB-GENE-030131-1334]	arg2	1.14341	0.00380384	0.253934
ENSDARG00000004094	acyl-CoA synthetase bubblegum family member 2 [Source:ZFIN;Acc:ZDB-GENE-030131-7099]	acsbg2	-0.424528	0.00384692	0.256194
ENSDARG00000103247	zinc finger protein 993 [Source:ZFIN;Acc:ZDB-GENE-110914-103]	znf993	2.28368	0.00387526	0.257464
ENSDARG00000110675		CT573103.4	2.83938	0.00389753	0.257748
ENSDARG00000074656	cathepsin S, ortholog2, tandem duplicate 1 [Source:ZFIN;Acc:ZDB-GENE-050522-559]	ctss2.1	1.19959	0.0038981	0.257748
ENSDARG00000032976	cardiac myosin light chain-1 [Source:ZFIN;Acc:ZDB-GENE-030522-1]	cmlc1	-7.02342	0.00391371	0.258166
ENSDARG00000068915	si:ch73-42k18.1 [Source:NCBI gene;Acc:100150220]	si:ch73-42k18.1	2.35071	0.0039562	0.260349
ENSDARG00000109259		CABZ01088982.1	1.79521	0.00396648	0.26041
ENSDARG00000114534	histone 1, H4, like [Source:ZFIN;Acc:ZDB-GENE-070927-10]	hist1h4l	3.38308	0.00402486	0.263619
ENSDARG00000074546	si:ch211-213a13.2 [Source:ZFIN;Acc:ZDB-GENE-050208-551]	si:ch211-213a13.2	1.39675	0.00405156	0.264096
ENSDARG00000023228	visinin-like 1a [Source:ZFIN;Acc:ZDB-GENE-041001-211]	vsnl1a	-0.592548	0.00405332	0.264096
ENSDARG00000105241	bloodthirsty-related gene family, member 26 [Source:ZFIN;Acc:ZDB-GENE-070705-378]	btr26	2.93056	0.00406068	0.264096
ENSDARG00000038682	zgc:171687 [Source:ZFIN;Acc:ZDB-GENE-071004-9]	zgc:171687	2.98724	0.00410759	0.266523
ENSDARG00000079850	dachsous cadherin-related 1b [Source:ZFIN;Acc:ZDB-GENE-050208-41]	dchs1b	-0.503881	0.00412715	0.267168
ENSDARG00000062510	BAF chromatin remodeling complex subunit BCL11B a [Source:ZFIN;Acc:ZDB-GENE-061207-62]	bcl11ba	-0.56332	0.00418316	0.269685
ENSDARG00000021172	cytochrome P450, family 2, subfamily AD, polypeptide 2 [Source:ZFIN;Acc:ZDB-GENE-020812-2]	cyp2ad2	5.70902	0.00418545	0.269685
ENSDARG00000086585	neuregulin 2b [Source:ZFIN;Acc:ZDB-GENE-090205-2]	nrg2b	-0.95684	0.00423266	0.272096
ENSDARG00000112491	histone 1, H4, like [Source:ZFIN;Acc:ZDB-GENE-070927-10]	hist1h4l	5.09615	0.00426702	0.273671
ENSDARG00000104472	si:ch211-39i2.2 [Source:ZFIN;Acc:ZDB-GENE-041008-126]	si:ch211-39i2.2	0.722884	0.00436495	0.278675
ENSDARG00000101295	proteasome 26S subunit, non-ATPase 4a [Source:ZFIN;Acc:ZDB-GENE-040625-104]	psmd4a	0.468277	0.00437188	0.278675
ENSDARG00000043135	proopiomelanocortin a [Source:ZFIN;Acc:ZDB-GENE-030513-2]	pomca	3.52711	0.00437515	0.278675
ENSDARG00000087873	2-epi-5-epi-valiolone synthase [Source:ZFIN;Acc:ZDB-GENE-131121-365]	eevs	1.69941	0.00441457	0.280542
ENSDARG00000028306	peripherin [Source:ZFIN;Acc:ZDB-GENE-990415-207]	prph	0.861967	0.00443688	0.281316
ENSDARG00000079302	actinodin2 [Source:ZFIN;Acc:ZDB-GENE-041105-2]	and2	-3.40074	0.00446236	0.282287
ENSDARG00000089486	complexin 3b [Source:ZFIN;Acc:ZDB-GENE-091204-403]	cplx3b	0.723925	0.00449844	0.283296
ENSDARG00000113431	si:ch211-276i6.1 [Source:ZFIN;Acc:ZDB-GENE-081103-1]	si:ch211-276i6.1	3.42317	0.00450056	0.283296
ENSDARG00000095401	si:rp71-1i20.1 [Source:ZFIN;Acc:ZDB-GENE-030131-8955]	si:rp71-1i20.1	-5.64732	0.0045089	0.283296
ENSDARG00000075648	sema domain, seven thrombospondin repeats (type 1 and type 1-like), transmembrane domain (TM) and short cytoplasmic domain, (semaphorin) 5Bb [Source:ZFIN;Acc:ZDB-GENE-130530-778]	sema5bb	-0.915776	0.00458967	0.28772
ENSDARG00000089519	fibulin 7 [Source:ZFIN;Acc:ZDB-GENE-170130-2]	fbln7	-1.29372	0.00461702	0.288782
ENSDARG00000040284	si:dkey-79d12.5 [Source:ZFIN;Acc:ZDB-GENE-131127-429]	si:dkey-79d12.5	0.964468	0.00471767	0.294414
ENSDARG00000101464		CABZ01088864.1	1.05387	0.00485427	0.30226
ENSDARG00000029722	high mobility group box 2a [Source:ZFIN;Acc:ZDB-GENE-051120-126]	hmgb2a	1.36864	0.00487909	0.303126
ENSDARG00000014287	enolase 2 [Source:ZFIN;Acc:ZDB-GENE-040704-27]	eno2	-0.566474	0.0049118	0.304477
ENSDARG00000029689	transketolase a [Source:ZFIN;Acc:ZDB-GENE-130530-578]	tkta	-0.487415	0.00493769	0.305078
ENSDARG00000044053	visinin-like 1b [Source:ZFIN;Acc:ZDB-GENE-080225-39]	vsnl1b	-0.768177	0.00494346	0.305078
ENSDARG00000077706	uncharacterized LOC108179108 [Source:NCBI gene;Acc:108179108]	CR749163.1	2.57922	0.00497439	0.306305
ENSDARG00000045945	synapsin IIa [Source:ZFIN;Acc:ZDB-GENE-040718-341]	syn2a	-0.610714	0.00504858	0.309884
ENSDARG00000115898		CR405710.2	3.46154	0.00505482	0.309884
ENSDARG00000102967		CT573282.1	0.786681	0.00509906	0.311907
ENSDARG00000078859	G0/G1 switch 2 [Source:ZFIN;Acc:ZDB-GENE-081022-103]	g0s2	1.62688	0.00513493	0.313411
ENSDARG00000063614	SKI family transcriptional corepressor 2 [Source:ZFIN;Acc:ZDB-GENE-060825-57]	skor2	0.636309	0.0051821	0.315597
ENSDARG00000037496	glutamate receptor, ionotropic, AMPA 4a [Source:ZFIN;Acc:ZDB-GENE-020125-7]	gria4a	-0.801361	0.00522065	0.317249
ENSDARG00000091211	alcohol dehydrogenase 8a [Source:ZFIN;Acc:ZDB-GENE-030529-3]	adh8a	-4.61681	0.00524732	0.318173
ENSDARG00000076858	transcriptional and immune response regulator [Source:HGNC Symbol;Acc:HGNC:1357]	TCIM	1.44975	0.00531642	0.321102
ENSDARG00000099006	NACHT, LRR and PYD domains-containing protein 12 [Source:NCBI gene;Acc:568664]	CABZ01029938.1	1.8445	0.00531875	0.321102
ENSDARG00000014652	ankyrin repeat domain 13B [Source:ZFIN;Acc:ZDB-GENE-050913-151]	ankrd13b	-0.866301	0.00539493	0.324995
ENSDARG00000028017	tumor protein p53 inducible nuclear protein 1 [Source:ZFIN;Acc:ZDB-GENE-031018-3]	tp53inp1	0.479084	0.00542307	0.325983
ENSDARG00000089090	monocyte to macrophage differentiation-associated 2b [Source:ZFIN;Acc:ZDB-GENE-090313-336]	mmd2b	2.22081	0.00555675	0.333297
ENSDARG00000102844		BX088596.2	2.22114	0.00560242	0.334495
ENSDARG00000074535	leucine rich repeat and Ig domain containing 2a [Source:ZFIN;Acc:ZDB-GENE-080327-19]	lingo2a	-1.0764	0.00560585	0.334495
ENSDARG00000100851	gephyrin b [Source:ZFIN;Acc:ZDB-GENE-070705-4]	gphnb	-0.514008	0.00561285	0.334495
ENSDARG00000078866	sidekick cell adhesion molecule 1a [Source:ZFIN;Acc:ZDB-GENE-081104-374]	sdk1a	-0.940088	0.00570576	0.338654
ENSDARG00000097648	si:dkey-35i13.1 [Source:ZFIN;Acc:ZDB-GENE-030131-8008]	si:dkey-35i13.1	-0.924969	0.00570703	0.338654
ENSDARG00000092407	zmp:0000001316 [Source:ZFIN;Acc:ZDB-GENE-140106-276]	zmp:0000001316	1.20012	0.00579097	0.341856
ENSDARG00000109749	si:ch211-162i8.7 [Source:ZFIN;Acc:ZDB-GENE-110914-84]	si:ch211-162i8.7	2.00012	0.00579274	0.341856
ENSDARG00000102591	bloodthirsty-related gene family, member 30 [Source:ZFIN;Acc:ZDB-GENE-040426-1407]	btr30	3.55697	0.00579793	0.341856
ENSDARG00000095120		CU207311.2	-4.92653	0.00591352	0.347933
ENSDARG00000076280	protein phosphatase 1, regulatory (inhibitor) subunit 1B [Source:ZFIN;Acc:ZDB-GENE-120126-1]	ppp1r1b	0.53858	0.00602568	0.353782
ENSDARG00000103566	translocase of outer mitochondrial membrane 20b [Source:NCBI gene;Acc:436971]	tomm20b	0.418037	0.0060469	0.354279
ENSDARG00000096802	si:dkeyp-13d11.1 [Source:ZFIN;Acc:ZDB-GENE-090313-377]	si:dkeyp-13d11.1	2.74298	0.00606049	0.354328
ENSDARG00000006923	calcium channel, voltage-dependent, P/Q type, alpha 1A subunit, b [Source:ZFIN;Acc:ZDB-GENE-090514-3]	cacna1ab	-1.13841	0.00609556	0.35563
ENSDARG00000037691	protocadherin 2 alpha b2 [Source:ZFIN;Acc:ZDB-GENE-041118-2]	pcdh2ab2	-1.75433	0.00612624	0.35667
ENSDARG00000037122	si:dkey-34l15.2 [Source:ZFIN;Acc:ZDB-GENE-081027-5]	TENM2	-0.535862	0.00616377	0.358105
ENSDARG00000103324	si:ch211-127b6.2 [Source:ZFIN;Acc:ZDB-GENE-081103-37]	si:ch211-127b6.2	2.24425	0.00622084	0.360666
ENSDARG00000068096	activating transcription factor 5a [Source:ZFIN;Acc:ZDB-GENE-060526-205]	atf5a	0.988773	0.00623937	0.360986
ENSDARG00000003429	heterogeneous nuclear ribonucleoprotein D-like [Source:ZFIN;Acc:ZDB-GENE-040426-2717]	hnrnpdl	0.389701	0.00630065	0.363774
ENSDARG00000104325	pleckstrin [Source:ZFIN;Acc:ZDB-GENE-040426-1506]	plek	1.63952	0.00632339	0.363819
ENSDARG00000003803	LIM homeobox 3 [Source:HGNC Symbol;Acc:HGNC:6595]	LHX3	0.516528	0.00634374	0.363819
ENSDARG00000013539	IKAROS family zinc finger 1 (Ikaros) [Source:ZFIN;Acc:ZDB-GENE-980526-304]	ikzf1	-1.4565	0.00635682	0.363819
ENSDARG00000088048	fibroblast growth factor 18a [Source:ZFIN;Acc:ZDB-GENE-030714-1]	fgf18a	1.16488	0.00635696	0.363819
ENSDARG00000113841	uncharacterized LOC559910 [Source:NCBI gene;Acc:559910]	AL844172.2	5.73925	0.00637161	0.363819
ENSDARG00000086658	crystallin, gamma M2d21 [Source:ZFIN;Acc:ZDB-GENE-081105-133]	crygm2d21	0.690675	0.00638008	0.363819
ENSDARG00000076221	ferritin, heavy polypeptide-like 28 [Source:ZFIN;Acc:ZDB-GENE-030131-7540]	fthl28	1.59967	0.00639314	0.363819
ENSDARG00000098281	si:dkey-237m9.1 [Source:ZFIN;Acc:ZDB-GENE-131118-30]	si:dkey-237m9.1	2.27986	0.00642986	0.364649
ENSDARG00000090564	si:ch73-162j3.4 [Source:ZFIN;Acc:ZDB-GENE-090313-136]	PDZD4	-1.12678	0.00643398	0.364649
ENSDARG00000012306	synaptotagmin XIII [Source:ZFIN;Acc:ZDB-GENE-050417-135]	syt13	-0.90031	0.00645159	0.364902
ENSDARG00000070537	stathmin 2b [Source:ZFIN;Acc:ZDB-GENE-050522-207]	stmn2b	-0.482697	0.00656283	0.37044
ENSDARG00000076462	neuron-derived neurotrophic factor , like [Source:ZFIN;Acc:ZDB-GENE-131127-464]	ndnfl	-0.959342	0.00673042	0.379129
ENSDARG00000115120	si:dkey-112g5.12 [Source:ZFIN;Acc:ZDB-GENE-081028-32]	si:dkey-112g5.12	1.97304	0.00676628	0.380377
ENSDARG00000094388	cadherin, EGF LAG seven-pass G-type receptor 2 [Source:ZFIN;Acc:ZDB-GENE-070122-2]	celsr2	0.790989	0.00681984	0.382614
ENSDARG00000027824	DNA topoisomerase I mitochondrial [Source:ZFIN;Acc:ZDB-GENE-040624-2]	top1mt	0.471993	0.00684666	0.382623
ENSDARG00000087176	ribosomal protein S6 kinase related a [Source:ZFIN;Acc:ZDB-GENE-130103-8]	rskra	1.42875	0.00685919	0.382623
ENSDARG00000040528	lectin, galactoside-binding, soluble, 3 binding protein b [Source:NCBI gene;Acc:405809]	lgals3bpb	-1.14924	0.00686134	0.382623
ENSDARG00000037172	DDRGK domain containing 1 [Source:NCBI gene;Acc:393263]	ddrgk1	0.772364	0.00690667	0.384379
ENSDARG00000055854	nuclear receptor subfamily 4, group A, member 3 [Source:ZFIN;Acc:ZDB-GENE-070824-4]	nr4a3	-0.704401	0.0069388	0.385246
ENSDARG00000096527		BX548015.2	1.34909	0.00695	0.385246
ENSDARG00000088378	zinc finger protein 1000 [Source:ZFIN;Acc:ZDB-GENE-110913-165]	znf1000	2.30558	0.00697193	0.385692
ENSDARG00000102075	si:ch1073-392o20.1 [Source:ZFIN;Acc:ZDB-GENE-091204-454]	RNF122	-0.885145	0.00704447	0.38893
ENSDARG00000100262		BX936382.1	1.42425	0.00720976	0.397266
ENSDARG00000096210	zinc finger protein 1050 [Source:ZFIN;Acc:ZDB-GENE-110913-27]	znf1050	1.61484	0.00723803	0.398034
ENSDARG00000038901	transmembrane protein 256 [Source:NCBI gene;Acc:550283]	tmem256	0.998946	0.00726613	0.398348
ENSDARG00000070972	si:ch211-81a5.8 [Source:ZFIN;Acc:ZDB-GENE-060503-138]	si:ch211-81a5.8	0.711908	0.00727242	0.398348
ENSDARG00000036625	polymerase (RNA) II (DNA directed) polypeptide F [Source:ZFIN;Acc:ZDB-GENE-040718-279]	polr2f	0.436214	0.00732879	0.400645
ENSDARG00000052494	protocadherin 18b [Source:ZFIN;Acc:ZDB-GENE-080804-1]	pcdh18b	-0.450856	0.00736413	0.401786
ENSDARG00000102719	protocadherin 2 alpha b 3 [Source:ZFIN;Acc:ZDB-GENE-041118-3]	pcdh2ab3	1.20174	0.00740654	0.403308
ENSDARG00000040087	erythrocyte membrane protein band 4.1 like 4A [Source:NCBI gene;Acc:30470]	epb41l4a	-0.503394	0.00747248	0.406102
ENSDARG00000089766	neuregulin 3b [Source:ZFIN;Acc:ZDB-GENE-130603-38]	nrg3b	-0.769687	0.00762096	0.413363
ENSDARG00000056230	growth hormone secretagogue receptor a [Source:ZFIN;Acc:ZDB-GENE-070912-238]	ghsra	3.51372	0.00765659	0.413708
ENSDARG00000075012	glycine receptor, alpha 2 [Source:ZFIN;Acc:ZDB-GENE-090407-1]	glra2	-1.03182	0.00765711	0.413708
ENSDARG00000022712	signal transducer and activator of transcription 3 (acute-phase response factor) [Source:ZFIN;Acc:ZDB-GENE-980526-68]	stat3	0.702644	0.00778286	0.419685
ENSDARG00000079396	leucine rich repeat and fibronectin type III domain containing 5b [Source:ZFIN;Acc:ZDB-GENE-080327-20]	lrfn5b	-0.663671	0.00782409	0.420344
ENSDARG00000117239		CR376741.2	2.36497	0.00782743	0.420344
ENSDARG00000096678	si:dkey-263j23.1 [Source:ZFIN;Acc:ZDB-GENE-131120-109]	si:dkey-263j23.1	5.22238	0.00784049	0.420344
ENSDARG00000090869	uncharacterized LOC100333939 [Source:NCBI gene;Acc:100333939]	FO904898.4	-5.3255	0.00795274	0.424444
ENSDARG00000104016	si:dkey-151j17.4 [Source:ZFIN;Acc:ZDB-GENE-141222-13]	si:dkey-151j17.4	-2.16292	0.00796247	0.424444
ENSDARG00000091277	adrenergic, alpha-2D-, receptor a [Source:NCBI gene;Acc:266754]	adra2da	-1.05495	0.00796282	0.424444
ENSDARG00000096904	si:dkeyp-100a5.4 [Source:ZFIN;Acc:ZDB-GENE-131122-37]	si:dkeyp-100a5.4	1.69835	0.00798467	0.424793
ENSDARG00000033587	enoyl-[acyl-carrier-protein] reductase, mitochondrial-like [Source:NCBI gene;Acc:101884755]	CABZ01088134.1	2.94903	0.0080027	0.424844
ENSDARG00000061042	gamma-aminobutyric acid (GABA) B receptor, 2 [Source:ZFIN;Acc:ZDB-GENE-060503-620]	gabbr2	-0.924905	0.00802068	0.424844
ENSDARG00000113599	hemoglobin beta embryonic-1.1 [Source:ZFIN;Acc:ZDB-GENE-030616-7]	hbbe1.1	1.07411	0.00804732	0.424844
ENSDARG00000117241		CABZ01067657.1	1.3286	0.00806109	0.424844
ENSDARG00000110291		CABZ01044731.2	0.673261	0.00806211	0.424844
ENSDARG00000112690		CR931802.4	0.716116	0.00812715	0.42746
ENSDARG00000099091		CU929418.1	2.08527	0.00816955	0.428878
ENSDARG00000104787	si:dkey-28k24.2 [Source:ZFIN;Acc:ZDB-GENE-121213-4]	si:dkey-28k24.2	4.64813	0.00823027	0.431251
ENSDARG00000069244	si:ch211-244b2.3 [Source:ZFIN;Acc:ZDB-GENE-030131-4737]	si:ch211-244b2.3	-2.02817	0.00827803	0.432936
ENSDARG00000103436		BX548028.1	4.83725	0.00837186	0.43702
ENSDARG00000105549	si:ch211-235p24.2 [Source:ZFIN;Acc:ZDB-GENE-160728-28]	RIC3	0.465809	0.00845216	0.440385
ENSDARG00000045639	ELAV like neuron-specific RNA binding protein 4 [Source:NCBI gene;Acc:30737]	elavl4	0.572965	0.00858998	0.446727
ENSDARG00000090890	chemokine-like receptor 1 [Source:ZFIN;Acc:ZDB-GENE-060526-126]	cmklr1	1.26264	0.00861309	0.447092
ENSDARG00000087390	hemoglobin, beta embryonic 1.3 [Source:ZFIN;Acc:ZDB-GENE-131120-128]	hbbe1.3	-0.583564	0.00878768	0.454785
ENSDARG00000012610	S-antigen; retina and pineal gland (arrestin) a [Source:ZFIN;Acc:ZDB-GENE-040426-1538]	saga	0.52183	0.00879405	0.454785
ENSDARG00000043307	steroid 5 alpha-reductase 3 [Source:NCBI gene;Acc:560717]	srd5a3	1.2747	0.00908164	0.468785
ENSDARG00000057074	retinitis pigmentosa GTPase regulator b [Source:ZFIN;Acc:ZDB-GENE-081015-2]	rpgrb	0.398315	0.00910926	0.469338
ENSDARG00000100024	histone cluster 1 H2A family member 6 [Source:ZFIN;Acc:ZDB-GENE-030131-6292]	hist1h2a6	2.98112	0.00913261	0.46967
ENSDARG00000111920	complexin 2 [Source:ZFIN;Acc:ZDB-GENE-081113-1]	cplx2	-0.945364	0.00918334	0.470675
ENSDARG00000004592	G protein-coupled receptor 22a [Source:NCBI gene;Acc:504167]	gpr22a	-0.787233	0.00918606	0.470675
ENSDARG00000078810	zgc:174320 [Source:ZFIN;Acc:ZDB-GENE-080206-2]	zgc:174320	2.81954	0.00923498	0.471537
ENSDARG00000007130	MRT4 homolog, ribosome maturation factor [Source:ZFIN;Acc:ZDB-GENE-050417-142]	mrto4	0.878147	0.00923865	0.471537
ENSDARG00000117529		BX005402.1	3.47863	0.00925381	0.471537
ENSDARG00000096979	zgc:193725 [Source:ZFIN;Acc:ZDB-GENE-080723-11]	NPC2	2.33063	0.00944852	0.480577
ENSDARG00000018896	matrix metallopeptidase 24 [Source:ZFIN;Acc:ZDB-GENE-040724-262]	mmp24	-0.754879	0.00950949	0.482793
ENSDARG00000098006		AL929523.1	1.84229	0.00956012	0.484479
ENSDARG00000046141	zgc:162025 [Source:NCBI gene;Acc:571775]	zgc:162025	0.905556	0.00959669	0.484907
ENSDARG00000100167	cold shock domain containing C2, RNA binding b [Source:NCBI gene;Acc:557375]	CSDC2	2.22873	0.00960349	0.484907
ENSDARG00000116855		CR383662.8	1.45419	0.00965202	0.486144
ENSDARG00000094668	si:ch211-51a19.5 [Source:ZFIN;Acc:ZDB-GENE-041014-366]	si:ch211-51a19.5	1.36249	0.009663	0.486144
ENSDARG00000117280		FO904885.3	3.28817	0.00969259	0.48675
ENSDARG00000071261	zmp:0000001139 [Source:ZFIN;Acc:ZDB-GENE-140106-99]	zmp:0000001139	2.32679	0.00975427	0.488619
ENSDARG00000102859	nuclear export mediator factor Nemf-like [Source:NCBI gene;Acc:108182745]	CABZ01092170.1	0.762943	0.009765	0.488619
ENSDARG00000115987	signal recognition particle 14 [Source:ZFIN;Acc:ZDB-GENE-050913-131]	srp14	0.579348	0.00988321	0.492839
ENSDARG00000016457	interferon regulatory factor 9 [Source:ZFIN;Acc:ZDB-GENE-040912-165]	irf9	0.925127	0.00988482	0.492839
ENSDARG00000026766	BCL2 like 10 [Source:ZFIN;Acc:ZDB-GENE-030825-2]	bcl2l10	0.376104	0.00996004	0.495699
ENSDARG00000098859	NOP14 nucleolar protein homolog (yeast) [Source:ZFIN;Acc:ZDB-GENE-030131-9691]	nop14	0.487885	0.010049	0.499232
ENSDARG00000078169	calcium channel, voltage-dependent, alpha 2/delta subunit 2b [Source:ZFIN;Acc:ZDB-GENE-060503-99]	cacna2d2b	-1.02867	0.0100757	0.499665
ENSDARG00000115962	transcription factor Adf-1-like [Source:NCBI gene;Acc:110439798]	LO017799.1	1.72573	0.0101334	0.501451
ENSDARG00000070567	Ca2+-dependent activator protein for secretion b [Source:ZFIN;Acc:ZDB-GENE-110621-2]	cadpsb	-0.468774	0.0101478	0.501451
ENSDARG00000096409		CR792438.2	2.39661	0.0101988	0.502385
ENSDARG00000027744	growth arrest and DNA-damage-inducible, beta a [Source:ZFIN;Acc:ZDB-GENE-040426-1971]	gadd45ba	0.856504	0.0102046	0.502385
ENSDARG00000091783	si:dkeyp-71f10.5 [Source:ZFIN;Acc:ZDB-GENE-131121-547]	si:dkeyp-71f10.5	1.72785	0.010221	0.502385
ENSDARG00000100105	interphotoreceptor matrix proteoglycan 2b [Source:ZFIN;Acc:ZDB-GENE-081031-56]	impg2b	0.755041	0.0102726	0.502821
ENSDARG00000077399	ubiquitin associated and SH3 domain containing Bb [Source:ZFIN;Acc:ZDB-GENE-080724-6]	ubash3bb	-1.01173	0.0102829	0.502821
ENSDARG00000101490	si:ch73-281i18.6 [Source:ZFIN;Acc:ZDB-GENE-141219-21]	si:ch73-281i18.6	1.32937	0.0102842	0.502821
ENSDARG00000087188	nuclear factor, interleukin 3 regulated, member 6 [Source:ZFIN;Acc:ZDB-GENE-040704-63]	nfil3-6	0.544265	0.0103667	0.504893
ENSDARG00000104205	complement factor H like 3 [Source:ZFIN;Acc:ZDB-GENE-050208-423]	cfhl3	-3.42147	0.0103702	0.504893
ENSDARG00000045269	6-pyruvoyltetrahydropterin synthase [Source:ZFIN;Acc:ZDB-GENE-070615-3]	pts	0.983878	0.0103811	0.504893
ENSDARG00000056145	si:dkey-159a18.1 [Source:ZFIN;Acc:ZDB-GENE-041210-204]	si:dkey-159a18.1	-2.02446	0.0104708	0.508033
ENSDARG00000036700	si:ch211-114n24.6 [Source:ZFIN;Acc:ZDB-GENE-120214-26]	si:ch211-114n24.6	-0.422941	0.0104823	0.508033
ENSDARG00000060758	NPHS1 adhesion molecule, nephrin [Source:ZFIN;Acc:ZDB-GENE-051102-1]	nphs1	-1.22201	0.0105305	0.509482
ENSDARG00000097891		CR751227.2	2.58025	0.0106082	0.512346
ENSDARG00000105366	histone cluster 1 H2A family member 10 [Source:ZFIN;Acc:ZDB-GENE-131127-92]	hist1h2a10	1.69844	0.0106593	0.513924
ENSDARG00000095252	si:dkey-40h20.1 [Source:ZFIN;Acc:ZDB-GENE-091113-44]	si:dkey-40h20.1	1.62114	0.0107044	0.5152
ENSDARG00000058413	ribonuclease T2, like [Source:ZFIN;Acc:ZDB-GENE-090819-2]	rnaset2l	-2.08675	0.0107287	0.515478
ENSDARG00000017710	protein phosphatase 1, regulatory (inhibitor) subunit 14Ab [Source:ZFIN;Acc:ZDB-GENE-040426-1783]	ppp1r14ab	0.626839	0.0108467	0.51976
ENSDARG00000019902	recoverin 2 [Source:ZFIN;Acc:ZDB-GENE-030131-7590]	rcvrn2	0.362004	0.010859	0.51976
ENSDARG00000093336	si:ch73-249k16.4 [Source:ZFIN;Acc:ZDB-GENE-091204-157]	si:ch73-249k16.4	2.07817	0.0108895	0.51976
ENSDARG00000089131	interleukin 17 receptor E-like [Source:ZFIN;Acc:ZDB-GENE-120112-1]	il17rel	1.8248	0.0108927	0.51976
ENSDARG00000069792	crystallin, gamma M2d5 [Source:ZFIN;Acc:ZDB-GENE-060918-4]	crygm2d5	-0.467346	0.0109942	0.523704
ENSDARG00000104049	cAMP responsive element binding protein-like 2 [Source:NCBI gene;Acc:436975]	crebl2	0.564584	0.0110252	0.52428
ENSDARG00000014215	cadherin 13, H-cadherin (heart) [Source:ZFIN;Acc:ZDB-GENE-060503-286]	cdh13	-1.05266	0.0110924	0.526574
ENSDARG00000086518	si:ch211-155o21.3 [Source:ZFIN;Acc:ZDB-GENE-121214-24]	si:ch211-155o21.3	1.46764	0.0112098	0.531091
ENSDARG00000102855	neogenin 1a [Source:ZFIN;Acc:ZDB-GENE-021031-1]	neo1a	-0.465721	0.0112258	0.531091
ENSDARG00000005150	T-box transcription factor 20 [Source:NCBI gene;Acc:57936]	tbx20	-1.00057	0.0112649	0.531587
ENSDARG00000004840	Ras association domain family member 1 [Source:ZFIN;Acc:ZDB-GENE-040912-14]	rassf1	0.414743	0.0112745	0.531587
ENSDARG00000109481		CABZ01092745.1	0.845659	0.0113022	0.53199
ENSDARG00000091317	hormonally up-regulated Neu-associated kinase [Source:ZFIN;Acc:ZDB-GENE-050309-240]	hunk	0.388683	0.011335	0.53263
ENSDARG00000111165	histone 1, H4, like [Source:ZFIN;Acc:ZDB-GENE-070927-10]	hist1h4l	2.23615	0.0113674	0.533248
ENSDARG00000043236	cyclin A1 [Source:ZFIN;Acc:ZDB-GENE-040311-2]	ccna1	2.12651	0.0114728	0.537287
ENSDARG00000022045	microtubule-associated protein 1Ab [Source:ZFIN;Acc:ZDB-GENE-100426-3]	map1ab	0.72674	0.0116556	0.544929
ENSDARG00000114422		CT009714.1	2.58736	0.0117071	0.546415
ENSDARG00000074322	si:ch211-194m7.3 [Source:ZFIN;Acc:ZDB-GENE-131121-19]	si:ch211-194m7.3	1.47411	0.0117599	0.547432
ENSDARG00000117560		AL954145.3	5.33119	0.0117683	0.547432
ENSDARG00000032246	teleost multiple tissue opsin b [Source:ZFIN;Acc:ZDB-GENE-091118-50]	tmtopsb	-1.01734	0.0118307	0.548745
ENSDARG00000022176	zgc:110372 [Source:ZFIN;Acc:ZDB-GENE-050417-297]	IGLON5	-0.824594	0.011836	0.548745
ENSDARG00000091993	diverse immunoglobulin domain-containing protein 1.1 [Source:ZFIN;Acc:ZDB-GENE-120305-1]	dicp1.1	2.53369	0.011878	0.549774
ENSDARG00000033234	stathmin 2a [Source:ZFIN;Acc:ZDB-GENE-041010-85]	stmn2a	-0.476132	0.0119696	0.552374
ENSDARG00000094210	ferritin, heavy polypeptide-like 31 [Source:ZFIN;Acc:ZDB-GENE-050522-428]	fthl31	1.30102	0.011974	0.552374
ENSDARG00000019278	guanine nucleotide binding protein (G protein), beta polypeptide 4a [Source:NCBI gene;Acc:100332205]	GNB4	-0.678741	0.0119977	0.552551
ENSDARG00000056804	si:dkey-40g16.6 [Source:ZFIN;Acc:ZDB-GENE-030131-9110]	si:dkey-40g16.6	-0.717687	0.0120545	0.554247
ENSDARG00000074033	ADAMTS-like 2 [Source:ZFIN;Acc:ZDB-GENE-070705-558]	adamtsl2	-1.14073	0.0121013	0.555481
ENSDARG00000087517	BTB (POZ) domain containing 3b [Source:ZFIN;Acc:ZDB-GENE-041210-282]	btbd3b	-0.636222	0.0121273	0.555756
ENSDARG00000014891	roundabout, axon guidance receptor, homolog 2 (Drosophila) [Source:ZFIN;Acc:ZDB-GENE-001019-1]	robo2	-0.406786	0.0122685	0.559059
ENSDARG00000006640	eomesodermin homolog a [Source:ZFIN;Acc:ZDB-GENE-001228-1]	eomesa	-0.577016	0.0122841	0.559059
ENSDARG00000104693	interleukin 6 signal transducer [Source:ZFIN;Acc:ZDB-GENE-080104-6]	il6st	0.431192	0.0123083	0.559059
ENSDARG00000092903	zgc:153317 [Source:ZFIN;Acc:ZDB-GENE-060825-309]	C18H15orf48	1.37796	0.012312	0.559059
ENSDARG00000114646	zinc finger protein 1021 [Source:ZFIN;Acc:ZDB-GENE-110913-143]	znf1021	1.30309	0.0123389	0.559059
ENSDARG00000004243	acid-sensing (proton-gated) ion channel family member 4b [Source:NCBI gene;Acc:407667]	asic4b	-1.36364	0.0123502	0.559059
ENSDARG00000100707	si:dkey-48g21.7 [Source:ZFIN;Acc:ZDB-LINCRNAG-050309-95]	si:dkey-48g21.7	1.85786	0.0123597	0.559059
ENSDARG00000109663		LO016987.2	0.704512	0.0123678	0.559059
ENSDARG00000076933	aldehyde dehydrogenase 1 family, member A3 [Source:ZFIN;Acc:ZDB-GENE-061128-2]	aldh1a3	-0.628165	0.0123806	0.559059
ENSDARG00000105439		CU459186.7	1.84472	0.0124651	0.561959
ENSDARG00000079166	angiotensin I converting enzyme (peptidyl-dipeptidase A) 1 [Source:ZFIN;Acc:ZDB-GENE-030131-1826]	ace	-0.707968	0.0125899	0.566668
ENSDARG00000091905	si:dkey-108k21.21 [Source:ZFIN;Acc:ZDB-GENE-131127-5]	si:dkey-108k21.21	2.09005	0.0126236	0.567265
ENSDARG00000003971	ISL LIM homeobox 2a [Source:NCBI gene;Acc:30157]	isl2a	-0.450773	0.0126552	0.567768
ENSDARG00000055678	A kinase (PRKA) anchor protein 12b [Source:ZFIN;Acc:ZDB-GENE-030131-9753]	akap12b	-0.350995	0.0127862	0.572212
ENSDARG00000019498	cryptochrome circadian regulator 5 [Source:ZFIN;Acc:ZDB-GENE-010426-8]	cry5	0.85941	0.0127955	0.572212
ENSDARG00000106298	kelch-like protein 12 [Source:NCBI gene;Acc:101884662]	CR751224.1	1.70777	0.012885	0.575287
ENSDARG00000102125	IQ motif and Sec7 domain ArfGEF 2a [Source:ZFIN;Acc:ZDB-GENE-170302-3]	iqsec2a	-0.6774	0.0129989	0.57944
ENSDARG00000102742	bone morphogenetic protein receptor, type IBb [Source:ZFIN;Acc:ZDB-GENE-090610-1]	bmpr1bb	0.621257	0.0130379	0.580248
ENSDARG00000109740	si:dkeyp-44b5.4 [Source:ZFIN;Acc:ZDB-GENE-120709-63]	si:dkeyp-44b5.4	4.76048	0.0130607	0.580336
ENSDARG00000114408		AL954137.2	1.57919	0.0131156	0.581292
ENSDARG00000091994	zinc finger protein 1048 [Source:ZFIN;Acc:ZDB-GENE-110913-13]	znf1048	1.82585	0.01314	0.581292
ENSDARG00000074415	zgc:171482 [Source:ZFIN;Acc:ZDB-GENE-080204-84]	zgc:171482	-0.928061	0.0131586	0.581292
ENSDARG00000051737	zgc:173552 [Source:ZFIN;Acc:ZDB-GENE-080220-24]		2.73653	0.013166	0.581292
ENSDARG00000058647	HCK proto-oncogene, Src family tyrosine kinase [Source:ZFIN;Acc:ZDB-GENE-090313-72]	hck	1.28445	0.0132738	0.585121
ENSDARG00000113183		CABZ01078858.1	0.485038	0.0132996	0.585332
ENSDARG00000098657		CR788237.1	3.7806	0.0133675	0.58703
ENSDARG00000005560	tyrosine 3-monooxygenase/tryptophan 5-monooxygenase activation protein, eta polypeptide [Source:ZFIN;Acc:ZDB-GENE-040426-2191]	ywhah	-0.367764	0.0133805	0.58703
ENSDARG00000105508	si:dkey-23a13.21 [Source:ZFIN;Acc:ZDB-GENE-160113-53]	si:dkey-23a13.21	2.33151	0.0134652	0.589815
ENSDARG00000086848	ATPase family AAA domain containing 3 [Source:ZFIN;Acc:ZDB-GENE-040426-1826]	atad3	0.486472	0.013508	0.590455
ENSDARG00000008767	TLE family member 2, transcriptional corepressor b [Source:ZFIN;Acc:ZDB-GENE-050208-677]	tle2b	-0.517284	0.0135223	0.590455
ENSDARG00000115456	zgc:173575 [Source:ZFIN;Acc:ZDB-GENE-080218-25]	zgc:173575	0.944907	0.0135498	0.590726
ENSDARG00000061846	relaxin family peptide receptor 3.2b [Source:ZFIN;Acc:ZDB-GENE-050208-346]	rxfp3.2b	-1.22043	0.0136201	0.592857
ENSDARG00000005479	Teneurin-3 [Source:UniProtKB/Swiss-Prot;Acc:Q9W7R4]	tenm3	-0.398663	0.0136467	0.593086
ENSDARG00000075830	synaptotagmin III [Source:ZFIN;Acc:ZDB-GENE-090601-1]	syt3	-0.784542	0.0137354	0.595769
ENSDARG00000056722	CD99 molecule-like 2 [Source:NCBI gene;Acc:323266]	cd99l2	-0.436531	0.0137513	0.595769
ENSDARG00000074583	glutamate receptor, ionotropic, delta 1a [Source:ZFIN;Acc:ZDB-GENE-120411-28]	grid1a	-1.06607	0.0137785	0.596019
ENSDARG00000075295	TUB like protein 1a [Source:ZFIN;Acc:ZDB-GENE-110411-122]	tulp1a	0.369461	0.0138535	0.598081
ENSDARG00000055365	si:dkey-25e12.3 [Source:NCBI gene;Acc:678527]	si:dkey-25e12.3	1.41196	0.0138846	0.598081
ENSDARG00000009299	dual specificity phosphatase 8a [Source:ZFIN;Acc:ZDB-GENE-040426-1842]	dusp8a	0.407554	0.0138989	0.598081
ENSDARG00000101618	ubiquitin-conjugating enzyme E2C [Source:ZFIN;Acc:ZDB-GENE-051030-48]	ube2c	0.507508	0.0139124	0.598081
ENSDARG00000023609		AL845324.1	-0.810521	0.014023	0.601904
ENSDARG00000114783	zinc finger protein 985 [Source:ZFIN;Acc:ZDB-GENE-110914-127]	znf985	1.88782	0.0140865	0.603698
ENSDARG00000013613	annexin A13, like [Source:ZFIN;Acc:ZDB-GENE-050522-310]	anxa13l	0.652862	0.0141212	0.604252
ENSDARG00000099650		CABZ01079663.1	0.503678	0.014152	0.60464
ENSDARG00000092732	si:ch73-256j6.5 [Source:ZFIN;Acc:ZDB-GENE-070705-225]	si:ch73-256j6.5	-4.35457	0.0142124	0.605221
ENSDARG00000102994	zinc finger protein 1034 [Source:ZFIN;Acc:ZDB-GENE-120703-37]	znf1034	1.9594	0.0142191	0.605221
ENSDARG00000024744	dipeptidyl-peptidase 6b [Source:ZFIN;Acc:ZDB-GENE-070705-88]	dpp6b	-1.30391	0.014231	0.605221
ENSDARG00000041179	crystallin, gamma M5 [Source:ZFIN;Acc:ZDB-GENE-041024-6]	crygm5	0.577134	0.0142637	0.605684
ENSDARG00000028389	RAB44, member RAS oncogene family [Source:ZFIN;Acc:ZDB-GENE-040724-117]	rab44	1.61985	0.0143733	0.608697
ENSDARG00000021392	cholinergic receptor, nicotinic, beta 5b [Source:ZFIN;Acc:ZDB-GENE-120809-5]	chrnb5b	-1.18466	0.0143811	0.608697
ENSDARG00000095195	si:dkey-19a16.11 [Source:ZFIN;Acc:ZDB-GENE-091204-409]	si:dkey-19a16.11	-4.85118	0.0144101	0.608697
ENSDARG00000088245	si:dkey-16p6.1 [Source:ZFIN;Acc:ZDB-GENE-081103-43]	si:dkey-16p6.1	2.16674	0.0144223	0.608697
ENSDARG00000062305	regulating synaptic membrane exocytosis 3 [Source:ZFIN;Acc:ZDB-GENE-060503-788]	rims3	-1.50256	0.0144537	0.609094
ENSDARG00000104701	MAP7 domain containing 1b [Source:ZFIN;Acc:ZDB-GENE-080215-23]	map7d1b	-0.424033	0.0145531	0.612355
ENSDARG00000097480	si:dkey-263j23.1 [Source:ZFIN;Acc:ZDB-GENE-131120-109]	si:dkey-263j23.1	3.90905	0.0146429	0.615199
ENSDARG00000100065		CU467837.1	1.70737	0.0147421	0.618432
ENSDARG00000078828	neuropeptide B [Source:ZFIN;Acc:ZDB-GENE-040107-40]	npb	-1.15619	0.0148552	0.62224
ENSDARG00000100284	CD247 molecule [Source:NCBI gene;Acc:100101654]	cd247	1.88792	0.0150123	0.626541
ENSDARG00000068279	si:ch211-240b21.2 [Source:ZFIN;Acc:ZDB-GENE-060526-125]	si:ch211-240b21.2	2.33644	0.0150267	0.626541
ENSDARG00000097039		CR759845.1	1.19316	0.0150478	0.626541
ENSDARG00000024895	family with sequence similarity 50 member A [Source:NCBI gene;Acc:550329]	fam50a	0.384018	0.0150482	0.626541
ENSDARG00000075926	immunoglobulin like and fibronectin type III domain containing 1, tandem duplicate 2 [Source:ZFIN;Acc:ZDB-GENE-130530-789]	igfn1.2	-2.34632	0.0150773	0.626686
ENSDARG00000040917	core-binding factor subunit beta [Source:ZFIN;Acc:ZDB-GENE-980526-440]	cbfb	-0.623214	0.0150979	0.626686
ENSDARG00000042545	sema domain, immunoglobulin domain (Ig), short basic domain, secreted, (semaphorin) 3Ga [Source:ZFIN;Acc:ZDB-GENE-050513-3]	sema3ga	-0.973245	0.0151194	0.626686
ENSDARG00000099481	tetratricopeptide repeat domain 8 [Source:NCBI gene;Acc:678551]	ttc8	0.473999	0.0151735	0.627992
ENSDARG00000027957	fibroblast growth factor 12a [Source:ZFIN;Acc:ZDB-GENE-050221-6]	fgf12a	-0.94324	0.0153208	0.633144
ENSDARG00000071662	si:rp71-36a1.3 [Source:ZFIN;Acc:ZDB-GENE-050208-566]	si:rp71-36a1.3	-3.73004	0.0153755	0.634461
ENSDARG00000095773	zgc:194906 [Source:ZFIN;Acc:ZDB-GENE-080722-43]	zgc:194906	2.65345	0.0158948	0.653274
ENSDARG00000112561	si:dkey-108k21.11 [Source:ZFIN;Acc:ZDB-GENE-131127-105]	si:dkey-108k21.11	4.73374	0.0158965	0.653274
ENSDARG00000098711		CABZ01078350.1	1.31441	0.0159205	0.653274
ENSDARG00000034423	synuclein, gamma a [Source:ZFIN;Acc:ZDB-GENE-050417-18]	sncga	-0.956253	0.0159255	0.653274
ENSDARG00000117185	si:ch211-255f4.11 [Source:ZFIN;Acc:ZDB-GENE-050208-387]	si:ch211-255f4.11	1.09007	0.0159979	0.654972
ENSDARG00000045909	dynein, light chain, Tctex-type 1 [Source:ZFIN;Acc:ZDB-GENE-041210-9]	dynlt1	0.634129	0.016014	0.654972
ENSDARG00000069766	calneuron 2 [Source:ZFIN;Acc:ZDB-GENE-091204-251]	caln2	-1.71495	0.0160679	0.656209
ENSDARG00000101842	zinc finger protein 1085 [Source:ZFIN;Acc:ZDB-GENE-080218-7]	znf1085	2.12908	0.016103	0.656675
ENSDARG00000019013	BarH-like homeobox 1b [Source:ZFIN;Acc:ZDB-GENE-060118-2]	barhl1b	-1.08102	0.0161978	0.658869
ENSDARG00000100233		CU633762.1	2.2248	0.0162042	0.658869
ENSDARG00000094171	low density lipoprotein receptor-related protein 1Ba [Source:ZFIN;Acc:ZDB-GENE-050208-608]	lrp1ba	-1.21632	0.016343	0.66354
ENSDARG00000057661	aldolase C, fructose-bisphosphate, a [Source:NCBI gene;Acc:792692]	aldoca	4.7613	0.0163996	0.663952
ENSDARG00000103369	transaldolase 1 [Source:ZFIN;Acc:ZDB-GENE-030131-3277]	taldo1	0.393593	0.0164247	0.663952
ENSDARG00000111040		LO018128.1	-1.56699	0.0164256	0.663952
ENSDARG00000098561	zgc:194202 [Source:ZFIN;Acc:ZDB-GENE-081022-72]	zgc:194202	1.58982	0.0164488	0.663952
ENSDARG00000045443	angiotensin II receptor, type 1b [Source:ZFIN;Acc:ZDB-GENE-110411-117]	agtr1b	1.16711	0.0166545	0.67128
ENSDARG00000103811	amylo-alpha-1, 6-glucosidase, 4-alpha-glucanotransferase a [Source:ZFIN;Acc:ZDB-GENE-071004-6]	agla	-0.424644	0.0166911	0.67178
ENSDARG00000041299	zgc:110796 [Source:NCBI gene;Acc:503755]	zgc:110796	0.636078	0.0167242	0.672137
ENSDARG00000059255	even-skipped homeobox 2 [Source:ZFIN;Acc:ZDB-GENE-980526-215]	evx2	-3.04971	0.0168776	0.676798
ENSDARG00000112301		CU570881.2	-3.06881	0.0168899	0.676798
ENSDARG00000077176	zgc:174888 [Source:ZFIN;Acc:ZDB-GENE-030328-33]	zgc:174888	0.902046	0.0169341	0.676798
ENSDARG00000016979	peptidase (mitochondrial processing) beta [Source:ZFIN;Acc:ZDB-GENE-050220-10]	pmpcb	0.488524	0.0169376	0.676798
ENSDARG00000053502	crystallin, alpha A [Source:ZFIN;Acc:ZDB-GENE-020508-1]	cryaa	-0.435	0.0169942	0.678083
ENSDARG00000087616	microtubule-associated protein tau b [Source:ZFIN;Acc:ZDB-GENE-081027-2]	maptb	-0.395419	0.0171292	0.682491
ENSDARG00000114169	Histone H3.2 [Source:UniProtKB/Swiss-Prot;Acc:Q4QRF4]	CR354435.2	2.45426	0.017232	0.685602
ENSDARG00000020212	solute carrier family 1 member 1 [Source:ZFIN;Acc:ZDB-GENE-040718-414]	slc1a1	-0.881056	0.0172573	0.685626
ENSDARG00000053966	cytochrome P450, family 17, subfamily A, polypeptide 2 [Source:ZFIN;Acc:ZDB-GENE-100822-1]	cyp17a2	4.64838	0.0173006	0.686365
ENSDARG00000097477	si:dkey-4c2.11 [Source:ZFIN;Acc:ZDB-GENE-131127-372]	si:dkey-4c2.11	-1.55042	0.0174096	0.689262
ENSDARG00000009922	diencephalon/mesencephalon homeobox 1a [Source:NCBI gene;Acc:142987]	dmbx1a	0.575172	0.0174233	0.689262
ENSDARG00000105407		CU459186.6	4.40228	0.0175975	0.694836
ENSDARG00000071656	si:dkey-19a16.5 [Source:ZFIN;Acc:ZDB-GENE-050208-733]	si:dkey-19a16.5	1.64008	0.0176142	0.694836
ENSDARG00000094889	complexin 4c [Source:ZFIN;Acc:ZDB-GENE-101018-1]	cplx4c	0.742953	0.0176402	0.694874
ENSDARG00000071007	polycomb group ring finger 5a [Source:NCBI gene;Acc:562327]	pcgf5a	1.04894	0.0176905	0.695335
ENSDARG00000102839	si:ch211-211k8.4 [Source:ZFIN;Acc:ZDB-GENE-050208-594]	si:ch211-211k8.4	4.65729	0.0177132	0.695335
ENSDARG00000039522	tubulin, beta 2A class IIa [Source:ZFIN;Acc:ZDB-GENE-050522-384]	tubb2	-0.827418	0.0177272	0.695335
ENSDARG00000103284		CABZ01110881.1	0.480346	0.0177521	0.695335
ENSDARG00000110481	si:ch73-42p12.2 [Source:ZFIN;Acc:ZDB-GENE-141216-329]	si:ch73-42p12.2	0.703216	0.0177803	0.695461
ENSDARG00000002396	cryptochrome DASH [Source:NCBI gene;Acc:402986]	cry-dash	0.626673	0.0178448	0.697003
ENSDARG00000100990	NME/NM23 nucleoside diphosphate kinase 3 [Source:ZFIN;Acc:ZDB-GENE-000210-34]	nme3	0.436602	0.0179702	0.698181
ENSDARG00000075393	SPARC (osteonectin), cwcv and kazal like domains proteoglycan 2 [Source:ZFIN;Acc:ZDB-GENE-090312-170]	spock2	-0.681428	0.0179741	0.698181
ENSDARG00000053493	aldehyde dehydrogenase 1 family, member A2 [Source:ZFIN;Acc:ZDB-GENE-011010-3]	aldh1a2	-0.559841	0.0179754	0.698181
ENSDARG00000112861	Ras association domain family member 4 [Source:HGNC Symbol;Acc:HGNC:20793]	RASSF4	1.81741	0.0179867	0.698181
ENSDARG00000069135	protein phosphatase 1, regulatory subunit 15A [Source:ZFIN;Acc:ZDB-GENE-030131-4408]	ppp1r15a	0.412667	0.0180162	0.698181
ENSDARG00000103483	lipopolysaccharide-induced TNF factor [Source:NCBI gene;Acc:431731]	litaf	1.10131	0.0180258	0.698181
ENSDARG00000017466	neural cell adhesion molecule 2 [Source:ZFIN;Acc:ZDB-GENE-010822-1]	ncam2	-1.10058	0.0181988	0.703899
ENSDARG00000068507	crystallin, beta B1 [Source:ZFIN;Acc:ZDB-GENE-010813-1]	crybb1	0.323762	0.0182357	0.704345
ENSDARG00000045383	G protein-coupled receptor 22b [Source:ZFIN;Acc:ZDB-GENE-141212-234]	gpr22b	-1.77793	0.0183024	0.705937
ENSDARG00000058488	adenosine A2a receptor b [Source:ZFIN;Acc:ZDB-GENE-081022-41]	adora2ab	-1.33219	0.0184396	0.710246
ENSDARG00000099727	single-stranded DNA binding protein 2 [Source:ZFIN;Acc:ZDB-GENE-090312-197]	ssbp2	-0.82714	0.0185276	0.712646
ENSDARG00000095328	si:ch211-191i18.4 [Source:ZFIN;Acc:ZDB-GENE-060503-15]	si:ch211-191i18.4	0.986855	0.0186009	0.714475
ENSDARG00000077073	tetratricopeptide repeat, ankyrin repeat and coiled-coil containing 1a [Source:ZFIN;Acc:ZDB-GENE-130530-819]	tanc1a	-0.616161	0.018733	0.718557
ENSDARG00000095308	si:ch211-215c18.3 [Source:NCBI gene;Acc:100318173]	si:ch211-215c18.3	-1.68274	0.0187824	0.719456
ENSDARG00000031712	glutamate receptor, metabotropic 3 [Source:ZFIN;Acc:ZDB-GENE-061009-13]	grm3	-1.19421	0.0188657	0.721652
ENSDARG00000030349	crystallin, beta A2a [Source:ZFIN;Acc:ZDB-GENE-040625-8]	cryba2a	0.344713	0.0189443	0.723663
ENSDARG00000105003	sodium channel, voltage-gated, type I, beta b [Source:ZFIN;Acc:ZDB-GENE-090408-1]	scn1bb	-0.815588	0.0189999	0.723876
ENSDARG00000077986	transmembrane protein 151B-like [Source:NCBI gene;Acc:793560]	TMEM151A	-0.687823	0.019002	0.723876
ENSDARG00000113899	zgc:77650 [Source:ZFIN;Acc:ZDB-GENE-030131-6151]	ARF5	0.396153	0.0190469	0.724593
ENSDARG00000003380	si:dkey-275b16.2 [Source:ZFIN;Acc:ZDB-GENE-090312-204]	si:dkey-275b16.2	1.02716	0.0191723	0.728365
ENSDARG00000117339		CABZ01078244.2	2.31127	0.0192898	0.731586
ENSDARG00000019782	interphotoreceptor matrix proteoglycan 2a [Source:ZFIN;Acc:ZDB-GENE-140106-217]	impg2a	0.763592	0.01933	0.731586
ENSDARG00000115359		CABZ01077555.1	1.12463	0.0193361	0.731586
ENSDARG00000016676	guanine nucleotide binding protein (G protein), alpha activating activity polypeptide O, a [Source:ZFIN;Acc:ZDB-GENE-040426-1757]	gnao1a	-0.355587	0.0194544	0.73506
ENSDARG00000100613		CABZ01089777.1	0.855732	0.0195207	0.736563
ENSDARG00000075307	potassium voltage-gated channel, KQT-like subfamily, member 2a [Source:ZFIN;Acc:ZDB-GENE-080220-37]	kcnq2a	-1.49231	0.0195897	0.738164
ENSDARG00000056651	GDNF family receptor alpha 4a [Source:ZFIN;Acc:ZDB-GENE-080402-10]	gfra4a	-1.13505	0.0196977	0.741227
ENSDARG00000044862	opsin 1 (cone pigments), long-wave-sensitive, 1 [Source:NCBI gene;Acc:30413]	opn1lw1	1.10997	0.0197812	0.742469
ENSDARG00000007398	leucine-rich repeat kinase 1 [Source:ZFIN;Acc:ZDB-GENE-101019-2]	lrrk1	-1.02557	0.0197842	0.742469
ENSDARG00000101334	cathepsin C [Source:ZFIN;Acc:ZDB-GENE-030619-9]	ctsc	0.626425	0.0198583	0.744245
ENSDARG00000058839	sushi domain containing 1 [Source:ZFIN;Acc:ZDB-GENE-060526-169]	susd1	-0.870242	0.0199312	0.74597
ENSDARG00000051718	si:ch211-113a14.24 [Source:ZFIN;Acc:ZDB-GENE-121214-122]	si:ch211-113a14.24	2.74044	0.0199884	0.747104
ENSDARG00000018342	gamma-glutamyltransferase 1b [Source:ZFIN;Acc:ZDB-GENE-110408-13]	ggt1b	2.63946	0.0200354	0.747856
ENSDARG00000086114	androgen-dependent TFPI-regulating protein-like [Source:NCBI gene;Acc:100537455]	CR792417.1	0.794183	0.0200851	0.748703
ENSDARG00000045594	shisa like 1a [Source:NCBI gene;Acc:560435]	shisal1a	-0.961843	0.0201327	0.748931
ENSDARG00000067817		CABZ01083448.1	0.543003	0.0201559	0.748931
ENSDARG00000114704	potassium channel tetramerization domain containing 20 [Source:NCBI gene;Acc:570693]	KCTD20	0.395976	0.0201721	0.748931
ENSDARG00000097206	si:dkey-43b14.8 [Source:NCBI gene;Acc:100320944]	BX324206.2	2.41769	0.0203189	0.753371
ENSDARG00000092094	si:dkey-112g5.11 [Source:ZFIN;Acc:ZDB-GENE-081028-22]	si:dkey-112g5.11	1.46652	0.0204308	0.756513
ENSDARG00000079985	nuclear receptor interacting protein 2 [Source:ZFIN;Acc:ZDB-GENE-030131-9425]	nrip2	0.46935	0.020499	0.758025
ENSDARG00000098508		CABZ01111959.1	1.61508	0.0205367	0.758411
ENSDARG00000101076	iroquois homeobox 3a [Source:ZFIN;Acc:ZDB-GENE-991119-5]	irx3a	-0.409713	0.0206905	0.761829
ENSDARG00000113858		AL928650.4	3.1797	0.020691	0.761829
ENSDARG00000008249	patched domain containing 4 [Source:NCBI gene;Acc:564097]	ptchd4	-1.05241	0.0207116	0.761829
ENSDARG00000094093		CR450817.2	3.35623	0.0208572	0.766171
ENSDARG00000113454		CABZ01068600.1	0.887807	0.0209248	0.767639
ENSDARG00000098193	zinc finger protein 998 [Source:ZFIN;Acc:ZDB-GENE-110913-164]	znf998	1.65845	0.0209603	0.767927
ENSDARG00000104335	si:ch211-212k5.4 [Source:ZFIN;Acc:ZDB-GENE-110914-68]	si:ch211-212k5.4	2.93005	0.0210154	0.768561
ENSDARG00000068742	uncharacterized LOC100151089 [Source:NCBI gene;Acc:100151089]	CR384085.1	2.59992	0.021055	0.768561
ENSDARG00000112126	zinc finger protein 995 [Source:ZFIN;Acc:ZDB-GENE-080215-13]	znf995	2.77889	0.0210606	0.768561
ENSDARG00000097110	si:dkey-56f14.4 [Source:ZFIN;Acc:ZDB-GENE-131121-272]	si:dkey-56f14.4	-1.10765	0.0211787	0.771305
ENSDARG00000042065	eukaryotic translation elongation factor 2a, tandem duplicate 2 [Source:ZFIN;Acc:ZDB-GENE-050208-348]	eef2a.2	0.814294	0.0211914	0.771305
ENSDARG00000114023		CU914780.1	4.19504	0.0212366	0.771941
ENSDARG00000092120		BX470185.1	1.86054	0.021363	0.775521
ENSDARG00000105521	si:ch73-40a2.1 [Source:ZFIN;Acc:ZDB-GENE-160728-89]	si:ch73-40a2.1	4.40526	0.0214708	0.778416
ENSDARG00000041976	interleukin 17a/f3 [Source:ZFIN;Acc:ZDB-GENE-041001-192]	il17a/f3	2.1794	0.0215706	0.781013
ENSDARG00000099867	si:ch73-103b2.1 [Source:ZFIN;Acc:ZDB-GENE-110408-42]	si:ch73-103b2.1	1.80832	0.0216544	0.783027
ENSDARG00000091144		CR749162.1	2.01741	0.0217181	0.783733
ENSDARG00000057035	stomatin (EPB72)-like 3b [Source:ZFIN;Acc:ZDB-GENE-050417-366]	stoml3b	1.7348	0.0217532	0.783733
ENSDARG00000098064	si:ch1073-205c8.5 [Source:ZFIN;Acc:ZDB-GENE-141212-307]	si:ch1073-205c8.5	0.688067	0.0217586	0.783733
ENSDARG00000076406	gamma-glutamylcyclotransferase a [Source:ZFIN;Acc:ZDB-GENE-081104-129]	ggcta	3.66976	0.0218368	0.785532
ENSDARG00000055226	solute carrier family 7 member 7 [Source:ZFIN;Acc:ZDB-GENE-051127-5]	slc7a7	0.747975	0.0219856	0.789861
ENSDARG00000099327	zgc:174944 [Source:ZFIN;Acc:ZDB-GENE-080207-2]	zgc:174944	1.94587	0.0221517	0.793972
ENSDARG00000037498	glutamate receptor, ionotropic, AMPA 3b [Source:ZFIN;Acc:ZDB-GENE-030616-53]	gria3b	-0.617488	0.0221572	0.793972
ENSDARG00000078657	si:zfos-1324h11.5 [Source:ZFIN;Acc:ZDB-GENE-141216-142]	FNDC10	-0.757981	0.0221908	0.79415
ENSDARG00000060496	calcium channel, voltage-dependent, T type, alpha 1H subunit a [Source:ZFIN;Acc:ZDB-GENE-130103-1]	cacna1ha	-0.696795	0.0222762	0.796182
ENSDARG00000087843		cntn1a	0.391327	0.0223339	0.797215
ENSDARG00000057728	solute carrier family 17 member 8 [Source:NCBI gene;Acc:563467]	slc17a8	-1.44054	0.0223761	0.797699
ENSDARG00000089475	hemoglobin, alpha embryonic 1.1 [Source:ZFIN;Acc:ZDB-GENE-980526-80]	hbae1.1	-0.766032	0.0225365	0.802119
ENSDARG00000034577	si:dkey-23o4.6 [Source:ZFIN;Acc:ZDB-GENE-100922-3]	si:dkey-23o4.6	1.43761	0.0225579	0.802119
ENSDARG00000062355	axonemal dynein light chain domain containing 1 [Source:ZFIN;Acc:ZDB-GENE-050208-341]	axdnd1	0.838742	0.0226037	0.802466
ENSDARG00000069373	calcitonin gene-related peptide-receptor component protein [Source:ZFIN;Acc:ZDB-GENE-060825-150]	crcp	0.820782	0.0226254	0.802466
ENSDARG00000079670	leucine rich repeat containing 7 [Source:ZFIN;Acc:ZDB-GENE-130530-876]	lrrc7	-0.736439	0.022685	0.803553
ENSDARG00000099970		CR383676.2	0.413506	0.0227457	0.804469
ENSDARG00000038258	protein C (inactivator of coagulation factors Va and VIIIa), a [Source:ZFIN;Acc:ZDB-GENE-060824-5]	proca	1.91133	0.0227688	0.804469
ENSDARG00000117250		BX908803.2	-4.24041	0.0228782	0.805442
ENSDARG00000105059	zgc:172282 [Source:NCBI gene;Acc:100003690]	zgc:172282	-0.853402	0.0228787	0.805442
ENSDARG00000006832	polypeptide N-acetylgalactosaminyltransferase 9 [Source:ZFIN;Acc:ZDB-GENE-060526-21]	galnt9	-0.460145	0.0228834	0.805442
ENSDARG00000007172	plexin A3 [Source:NCBI gene;Acc:567422]	plxna3	-0.366708	0.0229464	0.806637
ENSDARG00000098108	dual specificity phosphatase 2 [Source:ZFIN;Acc:ZDB-GENE-040801-188]	dusp2	0.530359	0.0230017	0.807561
ENSDARG00000077817	CXXC finger 4 [Source:ZFIN;Acc:ZDB-GENE-090313-179]	cxxc4	-0.621256	0.0230912	0.809544
ENSDARG00000086591	si:ch211-113a14.11 [Source:ZFIN;Acc:ZDB-GENE-121214-162]	si:ch211-113a14.11	2.16668	0.0231165	0.809544
ENSDARG00000095643	si:dkey-253d23.3 [Source:ZFIN;Acc:ZDB-GENE-050208-330]	si:dkey-253d23.3	1.10804	0.0232881	0.814525
ENSDARG00000079553	CD83 molecule [Source:ZFIN;Acc:ZDB-GENE-060503-762]	cd83	1.60401	0.0233846	0.816872
ENSDARG00000067851	lipocalin 15 [Source:ZFIN;Acc:ZDB-GENE-060825-349]	lcn15	2.08715	0.0237419	0.828312
ENSDARG00000076343	si:dkeyp-13d11.1 [Source:ZFIN;Acc:ZDB-GENE-090313-377]	si:dkeyp-13d11.1	2.70579	0.0238227	0.83009
ENSDARG00000059836	DNA-damage-inducible transcript 3 [Source:ZFIN;Acc:ZDB-GENE-070410-90]	ddit3	0.420388	0.0240045	0.835373
ENSDARG00000090499	transmembrane protein 121Ab [Source:ZFIN;Acc:ZDB-GENE-081031-69]	tmem121ab	-1.38314	0.0240698	0.836599
ENSDARG00000061454	neurexin 2a [Source:ZFIN;Acc:ZDB-GENE-070206-5]	nrxn2a	-0.423406	0.024118	0.836626
ENSDARG00000077608	G protein-coupled receptor 137Bb [Source:ZFIN;Acc:ZDB-GENE-100721-2]	gpr137bb	-0.612721	0.0241308	0.836626
ENSDARG00000109770		CABZ01117348.1	0.510565	0.0243056	0.841444
ENSDARG00000054578	ADP-ribosylation factor-like 6 interacting protein 1 [Source:ZFIN;Acc:ZDB-GENE-040426-1087]	arl6ip1	0.320328	0.0243338	0.841444
ENSDARG00000104300	WAS/WASL interacting protein family, member 1a [Source:ZFIN;Acc:ZDB-GENE-080204-101]	wipf1a	-1.68698	0.0243607	0.841444
ENSDARG00000099674	diverse immunoglobulin domain-containing protein 3.1 [Source:ZFIN;Acc:ZDB-GENE-120306-18]	dicp3.1	1.40023	0.0244617	0.843504
ENSDARG00000040156	glutamate receptor, metabotropic 4 [Source:ZFIN;Acc:ZDB-GENE-030131-5781]	grm4	-0.795015	0.0244811	0.843504
ENSDARG00000055647	finTRIM family, member 82 [Source:ZFIN;Acc:ZDB-GENE-030219-207]	ftr82	-0.925361	0.024542	0.844556
ENSDARG00000102788	si:zfos-128g4.1 [Source:ZFIN;Acc:ZDB-GENE-141212-382]	si:zfos-128g4.1	0.877115	0.0246067	0.845732
ENSDARG00000075564	family with sequence similarity 13 member A [Source:ZFIN;Acc:ZDB-GENE-050208-102]	fam13a	0.385381	0.0247388	0.849221
ENSDARG00000113664		BX901883.7	2.7082	0.0248491	0.851958
ENSDARG00000034871	midline 2 [Source:ZFIN;Acc:ZDB-GENE-090220-1]	mid2	-0.546382	0.0249224	0.853414
ENSDARG00000099182	ankyrin repeat domain 55 [Source:ZFIN;Acc:ZDB-GENE-080104-7]	ankrd55	-1.10185	0.024986	0.854393
ENSDARG00000108953	si:ch211-283g2.2 [Source:ZFIN;Acc:ZDB-GENE-060526-151]	si:ch211-283g2.2	1.63032	0.0250125	0.854393
ENSDARG00000034268	slit homolog 3 (Drosophila) [Source:ZFIN;Acc:ZDB-GENE-010306-4]	slit3	-0.821376	0.0251397	0.857685
ENSDARG00000088117	fucosyltransferase 8b (alpha (1,6) fucosyltransferase) [Source:ZFIN;Acc:ZDB-GENE-130530-923]	fut8b	-1.17444	0.0254137	0.865969
ENSDARG00000099710		BX284696.1	2.1465	0.0255204	0.868538
ENSDARG00000079036	zinc finger-like gene 1k [Source:ZFIN;Acc:ZDB-GENE-110131-2]	znfl1k	1.78066	0.0256209	0.87089
ENSDARG00000032799	potassium voltage-gated channel, Shal-related subfamily, member 2 [Source:ZFIN;Acc:ZDB-GENE-041210-70]	kcnd2	-0.667496	0.0256872	0.872076
ENSDARG00000094978	si:ch73-18b11.2 [Source:ZFIN;Acc:ZDB-GENE-070912-333]	si:ch73-18b11.2	1.04485	0.0257707	0.873845
ENSDARG00000045929	ornithine decarboxylase antizyme 2a [Source:ZFIN;Acc:ZDB-GENE-121005-1]	oaz2a	0.341862	0.0259221	0.877904
ENSDARG00000056915	si:ch211-237l4.6 [Source:ZFIN;Acc:ZDB-GENE-040724-42]	si:ch211-237l4.6	0.722127	0.0259957	0.879327
ENSDARG00000105452	plexin A1a [Source:ZFIN;Acc:ZDB-GENE-140106-137]	plxna1a	-0.489201	0.0260349	0.879346
ENSDARG00000055154	solute carrier family 8 member 4a [Source:ZFIN;Acc:ZDB-GENE-060110-2]	slc8a4a	-0.793603	0.0260684	0.879346
ENSDARG00000116781	histone 1, H4, like [Source:ZFIN;Acc:ZDB-GENE-070927-10]	hist1h4l	4.8356	0.0260913	0.879346
ENSDARG00000103737	si:ch211-230g14.6 [Source:ZFIN;Acc:ZDB-GENE-081105-134]	si:ch211-230g14.6	1.07588	0.0261549	0.880123
ENSDARG00000043821	Kruppel-like factor 7b [Source:ZFIN;Acc:ZDB-GENE-041014-171]	klf7b	0.429224	0.0261944	0.880123
ENSDARG00000117789		CU855688.2	1.33597	0.0262094	0.880123
ENSDARG00000090787	kelch domain containing 8B [Source:ZFIN;Acc:ZDB-GENE-090313-174]	klhdc8b	-1.18158	0.0263186	0.882724
ENSDARG00000042927	microtubule-associated protein, RP/EB family, member 1a [Source:ZFIN;Acc:ZDB-GENE-030131-6067]	mapre1a	0.572367	0.0265	0.887735
ENSDARG00000008623	COP9 signalosome subunit 3 [Source:HGNC Symbol;Acc:HGNC:2239]	cops3	0.350576	0.0265721	0.889078
ENSDARG00000095454	si:dkey-19a16.13 [Source:ZFIN;Acc:ZDB-GENE-110411-2]	si:dkey-19a16.13	1.00968	0.0266591	0.890631
ENSDARG00000113723	BAR/IMD domain containing adaptor protein 2b [Source:ZFIN;Acc:ZDB-GENE-100812-7]	baiap2b	1.2338	0.0266969	0.890631
ENSDARG00000040123	zinc finger protein, FOG family member 2a [Source:ZFIN;Acc:ZDB-GENE-060130-4]	zfpm2a	-0.803926	0.0267336	0.890631
ENSDARG00000016255	charged multivesicular body protein 4Ba [Source:NCBI gene;Acc:393164]	chmp4ba	0.416851	0.0267468	0.890631
ENSDARG00000086756	si:ch73-167i17.6 [Source:ZFIN;Acc:ZDB-GENE-120215-238]	RGS9BP	0.482922	0.0268247	0.892155
ENSDARG00000070694	neurexophilin 3 [Source:ZFIN;Acc:ZDB-GENE-131121-356]	nxph3	1.73691	0.0268868	0.893151
ENSDARG00000104924	myozenin-2 [Source:NCBI gene;Acc:100536537]	BX072577.1	0.742216	0.0269871	0.89541
ENSDARG00000040295	apolipoprotein Eb [Source:NCBI gene;Acc:30314]	apoeb	0.546358	0.027066	0.896958
ENSDARG00000019417	growth arrest and DNA-damage-inducible, gamma a [Source:ZFIN;Acc:ZDB-GENE-040426-1882]	gadd45ga	0.349945	0.0271046	0.897167
ENSDARG00000011989	cone-rod homeobox [Source:ZFIN;Acc:ZDB-GENE-010403-1]	crx	0.356626	0.0271578	0.897856
ENSDARG00000057911	zgc:86709 [Source:ZFIN;Acc:ZDB-GENE-040625-35]	ACTC1	-1.37706	0.0272092	0.898419
ENSDARG00000004586	neurotrophic tyrosine kinase, receptor, type 1 [Source:ZFIN;Acc:ZDB-GENE-980526-118]	ntrk1	-2.53451	0.0272586	0.898419
ENSDARG00000097107		AL928927.1	2.48516	0.0272719	0.898419
ENSDARG00000071209	opiate receptor-like 1 [Source:ZFIN;Acc:ZDB-GENE-040312-4]	oprl1	-1.35637	0.0273803	0.898959
ENSDARG00000059682	solute carrier family 43 member 3a [Source:ZFIN;Acc:ZDB-GENE-110208-8]	slc43a3a	0.396404	0.0273818	0.898959
ENSDARG00000104128	sorting nexin 2 [Source:ZFIN;Acc:ZDB-GENE-051120-45]	snx2	0.369276	0.0273854	0.898959
ENSDARG00000018423	sulfatase 2a [Source:ZFIN;Acc:ZDB-GENE-040426-759]	sulf2a	0.665578	0.0276531	0.906677
ENSDARG00000115248	cyclin dependent kinase 2 associated protein 1 [Source:NCBI gene;Acc:108191561]	CDK2AP1	0.522175	0.0277068	0.906896
ENSDARG00000096299	si:ch211-255a21.2 [Source:NCBI gene;Acc:796413]	CR786578.2	3.40974	0.0277625	0.906896
ENSDARG00000101312	si:dkey-31n13.4 [Source:ZFIN;Acc:ZDB-GENE-071008-3]	si:dkey-31n13.4	1.58228	0.0278013	0.906896
ENSDARG00000098640	immunoglobulin superfamily member 3-like [Source:NCBI gene;Acc:100005927]	CU984600.3	1.16051	0.0278173	0.906896
ENSDARG00000009281	dynamin 1b [Source:ZFIN;Acc:ZDB-GENE-100920-3]	dnm1b	-0.461209	0.0278231	0.906896
ENSDARG00000094343	si:dkey-20i20.8 [Source:ZFIN;Acc:ZDB-GENE-060503-59]	si:dkey-20i20.8	1.15586	0.0278891	0.907983
ENSDARG00000075532	solute carrier family 4 member 11 [Source:ZFIN;Acc:ZDB-GENE-090313-183]	slc4a11	-1.45695	0.0280283	0.911445
ENSDARG00000007377	ornithine decarboxylase 1 [Source:ZFIN;Acc:ZDB-GENE-010816-1]	odc1	-0.32675	0.0281714	0.914317
ENSDARG00000100032	gamma-aminobutyric acid type A receptor beta2 subunit [Source:HGNC Symbol;Acc:HGNC:4082]	GABRB2	-1.39694	0.0281952	0.914317
ENSDARG00000052765	glutamate receptor, ionotropic, AMPA 2b [Source:ZFIN;Acc:ZDB-GENE-020125-4]	gria2b	-0.551073	0.0282623	0.914317
ENSDARG00000060481	atlastin GTPase 1 [Source:ZFIN;Acc:ZDB-GENE-030131-8003]	atl1	-0.387486	0.0282897	0.914317
ENSDARG00000096681		BX927300.1	2.32414	0.028302	0.914317
ENSDARG00000001937	solute carrier family 2, facilitated glucose transporter member 1-like [Source:NCBI gene;Acc:100334818]	LO018422.1	-4.08963	0.0283268	0.914317
ENSDARG00000058543	laminin, alpha 5 [Source:ZFIN;Acc:ZDB-GENE-030131-9823]	lama5	-0.453323	0.0283471	0.914317
ENSDARG00000022254	protein kinase C, beta b [Source:NCBI gene;Acc:393953]	prkcbb	-0.824032	0.0284594	0.916641
ENSDARG00000096583		AL928835.1	2.79403	0.0284852	0.916641
ENSDARG00000073713	vav 3 guanine nucleotide exchange factor b [Source:ZFIN;Acc:ZDB-GENE-070912-251]	vav3b	-0.702101	0.0285843	0.918385
ENSDARG00000094980		CR792454.1	1.50709	0.0286075	0.918385
ENSDARG00000095800	si:ch211-105n15.1 [Source:ZFIN;Acc:ZDB-GENE-110411-33]	si:ch211-105n15.1	-4.46715	0.0286926	0.918385
ENSDARG00000095450		AL929237.2	3.96365	0.0286929	0.918385
ENSDARG00000088549	si:ch1073-390k14.1 [Source:ZFIN;Acc:ZDB-GENE-141215-14]	si:ch1073-390k14.1	0.8131	0.0287181	0.918385
ENSDARG00000038378	S-antigen; retina and pineal gland (arrestin) b [Source:ZFIN;Acc:ZDB-GENE-050913-98]	sagb	0.573291	0.028743	0.918385
ENSDARG00000019861	fibrinogen-like 2a [Source:ZFIN;Acc:ZDB-GENE-030131-9506]	fgl2a	-1.66639	0.0288158	0.918385
ENSDARG00000077721	lysine-rich nucleolar protein 1 [Source:ZFIN;Acc:ZDB-GENE-090313-76]	knop1	0.364662	0.0288252	0.918385
ENSDARG00000086490	si:dkey-92f12.2 [Source:ZFIN;Acc:ZDB-GENE-091204-379]	si:dkey-92f12.2	0.364062	0.028837	0.918385
ENSDARG00000110346		LO018557.1	0.414362	0.0289783	0.919372
ENSDARG00000105359	Histone H3.2 [Source:UniProtKB/Swiss-Prot;Acc:Q4QRF4]	FP325123.1	1.57539	0.0289785	0.919372
ENSDARG00000075048	LON peptidase N-terminal domain and ring finger 1 [Source:ZFIN;Acc:ZDB-GENE-101021-4]	lonrf1	0.433096	0.0289805	0.919372
ENSDARG00000079524	zinc finger-like gene 1g [Source:ZFIN;Acc:ZDB-GENE-090311-14]	znfl1g	1.80042	0.0290004	0.919372
ENSDARG00000104501	histone H2B 1/2 [Source:NCBI gene;Acc:100329560]	FP236812.1	1.2896	0.0291933	0.923305
ENSDARG00000068994	Pim proto-oncogene, serine/threonine kinase, related 129 [Source:ZFIN;Acc:ZDB-GENE-130531-13]	pimr129	1.89664	0.0291946	0.923305
ENSDARG00000068088	transcobalamin beta a [Source:ZFIN;Acc:ZDB-GENE-060531-123]	tcnba	2.78178	0.0292418	0.923305
ENSDARG00000025855	calcium/calmodulin-dependent protein kinase II inhibitor 1a [Source:ZFIN;Acc:ZDB-GENE-050522-319]	camk2n1a	0.598102	0.0292574	0.923305
ENSDARG00000079723	si:dkey-46g23.1 [Source:ZFIN;Acc:ZDB-GENE-070705-475]	si:dkey-46g23.1	0.360008	0.0293642	0.923522
ENSDARG00000094017	zinc finger protein 1137 [Source:ZFIN;Acc:ZDB-GENE-071004-87]	znf1137	1.83481	0.0293707	0.923522
ENSDARG00000020143	phenylalanine hydroxylase [Source:ZFIN;Acc:ZDB-GENE-031006-2]	pah	-0.37543	0.02942	0.923522
ENSDARG00000062347	microtubule associated tumor suppressor candidate 2a [Source:ZFIN;Acc:ZDB-GENE-091204-75]	mtus2a	-0.861341	0.0294546	0.923522
ENSDARG00000074359	zinc finger-like gene 1c [Source:ZFIN;Acc:ZDB-GENE-110131-4]	znfl1c	1.74634	0.0294571	0.923522
ENSDARG00000101254		BX649411.1	1.21548	0.0295191	0.923522
ENSDARG00000059707	si:ch211-216l23.1 [Source:NCBI gene;Acc:566696]		-0.366427	0.0295383	0.923522
ENSDARG00000102132		AL954698.2	-4.08712	0.0296165	0.923522
ENSDARG00000100639		CR847939.1	2.93568	0.0296352	0.923522
ENSDARG00000097091	si:dkey-7j22.2 [Source:ZFIN;Acc:ZDB-GENE-131122-92]	si:dkey-7j22.2	1.9256	0.0296364	0.923522
ENSDARG00000101918	si:ch211-111e20.1 [Source:ZFIN;Acc:ZDB-GENE-141216-88]	si:ch211-111e20.1	1.80557	0.0296364	0.923522
ENSDARG00000055459	discs, large (Drosophila) homolog-associated protein 3 [Source:ZFIN;Acc:ZDB-GENE-060503-413]	dlgap3	-0.63707	0.0297057	0.923522
ENSDARG00000061848	collagen, type XV, alpha 1b [Source:ZFIN;Acc:ZDB-GENE-070912-689]	col15a1b	-0.342616	0.0297261	0.923522
ENSDARG00000114031	slow myosin heavy chain 3 [Source:ZFIN;Acc:ZDB-GENE-080930-1]	smyhc3	-2.17531	0.0297299	0.923522
ENSDARG00000086612	si:ch73-269m14.4 [Source:ZFIN;Acc:ZDB-GENE-120215-94]	si:ch73-269m14.4	2.61858	0.029795	0.923819
ENSDARG00000033501	zgc:64189 [Source:ZFIN;Acc:ZDB-GENE-040426-1397]	zgc:64189	1.33286	0.029806	0.923819
ENSDARG00000102106	transglutaminase 1 like 1 [Source:ZFIN;Acc:ZDB-GENE-060503-139]	tgm1l1	-0.975389	0.0299072	0.925922
ENSDARG00000012896	anosmin 1a [Source:ZFIN;Acc:ZDB-GENE-000201-9]	anos1a	0.40872	0.0299795	0.926695
ENSDARG00000105447	si:ch211-129p13.1 [Source:ZFIN;Acc:ZDB-GENE-160113-47]	si:ch211-129p13.1	-0.402264	0.0300432	0.926695
ENSDARG00000038868	engrailed homeobox 2b [Source:NCBI gene;Acc:30238]	en2b	-1.64364	0.0300645	0.926695
ENSDARG00000071103	si:dkey-222p3.1 [Source:ZFIN;Acc:ZDB-GENE-050208-374]	si:dkey-222p3.1	0.970547	0.0300656	0.926695
ENSDARG00000060085	potassium voltage-gated channel, KQT-like subfamily, member 3 [Source:ZFIN;Acc:ZDB-GENE-070912-301]	kcnq3	-0.884548	0.0304902	0.93874
ENSDARG00000009351	fibroblast growth factor 6a [Source:ZFIN;Acc:ZDB-GENE-980526-559]	fgf6a	1.07405	0.0306252	0.941852
ENSDARG00000038981	zgc:153615 [Source:ZFIN;Acc:ZDB-GENE-061110-79]	zgc:153615	-0.937412	0.0306784	0.942015
ENSDARG00000115890	si:dkey-1b17.9 [Source:ZFIN;Acc:ZDB-GENE-050208-546]	si:dkey-1b17.9	1.6954	0.0307134	0.942015
ENSDARG00000037553	interleukin 1 receptor accessory protein-like 2 [Source:ZFIN;Acc:ZDB-GENE-040219-5]	il1rapl2	-1.16425	0.0307323	0.942015
ENSDARG00000110152	histone 1, H4, like [Source:ZFIN;Acc:ZDB-GENE-070927-10]	hist1h4l	1.73689	0.0307949	0.942895
ENSDARG00000013050	ATP-binding cassette, sub-family C (CFTR/MRP), member 12 [Source:ZFIN;Acc:ZDB-GENE-050517-25]	abcc12	-1.19517	0.0311586	0.951859
ENSDARG00000104518	t-cell receptor gamma, type unspecified [Source:ZFIN;Acc:ZDB-GENE-141212-2]	tcrg	-4.07103	0.0311736	0.951859
ENSDARG00000093044	si:ch211-161h7.5 [Source:ZFIN;Acc:ZDB-GENE-091204-265]	si:ch211-161h7.5	1.35632	0.0311905	0.951859
ENSDARG00000035880	ATPase H+ transporting V1 subunit C1b [Source:NCBI gene;Acc:449655]	atp6v1c1b	-0.3969	0.0312492	0.952217
ENSDARG00000110151	ankyrin 3b [Source:ZFIN;Acc:ZDB-GENE-060621-2]	ank3b	0.399483	0.0313182	0.952217
ENSDARG00000096429		BX663606.1	1.38847	0.031325	0.952217
ENSDARG00000054447	solute carrier family 29 member 1b [Source:ZFIN;Acc:ZDB-GENE-130415-4]	slc29a1b	0.862893	0.0313394	0.952217
ENSDARG00000061120	solute carrier family 43 member 2b [Source:ZFIN;Acc:ZDB-GENE-041212-6]	slc43a2b	0.785953	0.0313801	0.952411
ENSDARG00000111916	histone deacetylase complex subunit SAP30L-like [Source:NCBI gene;Acc:103910016]	CABZ01050105.2	1.12653	0.0314217	0.952632
ENSDARG00000069619	activating transcription factor 7 interacting protein [Source:NCBI gene;Acc:558977]	atf7ip	-0.349905	0.0315603	0.955143
ENSDARG00000071596	neuropilin (NRP) and tolloid (TLL)-like 1, like [Source:ZFIN;Acc:ZDB-GENE-091207-1]	neto1l	-1.18698	0.0315733	0.955143
ENSDARG00000090690	neural EGFL like 2 [Source:HGNC Symbol;Acc:HGNC:7751]	nell2a	-0.467126	0.0316227	0.955302
ENSDARG00000069499	sperm associated antigen 1b [Source:ZFIN;Acc:ZDB-GENE-061013-512]	spag1b	0.671564	0.0316484	0.955302
ENSDARG00000018976	serine palmitoyltransferase, long chain base subunit 2a [Source:ZFIN;Acc:ZDB-GENE-050522-23]	sptlc2a	-0.431978	0.0316817	0.955302
ENSDARG00000071581	zgc:174564 [Source:ZFIN;Acc:ZDB-GENE-080219-52]	zgc:174564	0.83671	0.0317833	0.957326
ENSDARG00000109466	si:dkeyp-77c4.5 [Source:ZFIN;Acc:ZDB-GENE-131119-35]	si:dkeyp-77c4.5	1.77653	0.0319251	0.960555
ENSDARG00000116356		CU607104.1	3.98905	0.032016	0.962247
ENSDARG00000116273	trace amine associated receptor 16f [Source:ZFIN;Acc:ZDB-GENE-060413-20]	taar16f	2.58082	0.032104	0.963849
ENSDARG00000060846	calcium binding protein 7b [Source:ZFIN;Acc:ZDB-GENE-060526-366]	cabp7b	-2.04309	0.0321889	0.965355
ENSDARG00000052960	natriuretic peptide A [Source:ZFIN;Acc:ZDB-GENE-030131-95]	nppa	-2.91987	0.032338	0.96878
ENSDARG00000105071	nitric oxide synthase 1 (neuronal) adaptor protein a [Source:ZFIN;Acc:ZDB-GENE-081024-1]	nos1apa	-0.607295	0.0324789	0.971596
ENSDARG00000044976	keratin 93 [Source:ZFIN;Acc:ZDB-GENE-060421-4592]	krt93	-4.07901	0.0325222	0.971596
ENSDARG00000042683	si:dkey-15j16.3 [Source:ZFIN;Acc:ZDB-GENE-030131-4680]	si:dkey-15j16.3	2.06482	0.032537	0.971596
ENSDARG00000010602	zgc:112294 [Source:NCBI gene;Acc:553704]	zgc:112294	0.398289	0.0326753	0.973954
ENSDARG00000077470	si:dkey-193b15.8 [Source:ZFIN;Acc:ZDB-GENE-070912-416]	si:dkey-193b15.8	-0.973624	0.0326865	0.973954
ENSDARG00000101067	shortage in chiasmata 1 [Source:ZFIN;Acc:ZDB-GENE-141222-97]	shoc1	-2.62549	0.0327211	0.973954
ENSDARG00000109840	zinc finger protein 993 [Source:ZFIN;Acc:ZDB-GENE-110914-103]	znf993	2.38232	0.0327732	0.974459
ENSDARG00000079872	Rap guanine nucleotide exchange factor (GEF) 4 [Source:ZFIN;Acc:ZDB-GENE-070912-385]	rapgef4	-0.839347	0.0328239	0.974789
ENSDARG00000038052	si:ch211-149k23.9 [Source:ZFIN;Acc:ZDB-GENE-100922-15]	si:ch211-149k23.9	0.908014	0.0328545	0.974789
ENSDARG00000068247	leucine zipper protein 2 [Source:NCBI gene;Acc:100137118]	luzp2	-0.73972	0.0329238	0.975802
ENSDARG00000038974	dihydropyrimidinase like 2a [Source:NCBI gene;Acc:798555]	FO904844.1	-0.424918	0.0331022	0.980043
ENSDARG00000086569	zgc:172051 [Source:ZFIN;Acc:ZDB-GENE-080219-23]	zgc:172051	-4.0716	0.0331692	0.980981
ENSDARG00000089172	si:ch1073-391i24.1 [Source:ZFIN;Acc:ZDB-GENE-110408-69]	si:ch1073-391i24.1	0.529099	0.0335099	0.990003
ENSDARG00000035388	transmembrane protein 174 [Source:ZFIN;Acc:ZDB-GENE-080819-2]	tmem174	-3.93942	0.0336124	0.991554
ENSDARG00000052330	solute carrier family 4 member 2b [Source:ZFIN;Acc:ZDB-GENE-030429-14]	slc4a2b	0.569214	0.033638	0.991554
ENSDARG00000094653	si:dkey-149m13.5 [Source:ZFIN;Acc:ZDB-GENE-110913-74]	si:dkey-149m13.5	1.2935	0.0336695	0.991554
ENSDARG00000105882	LBH regulator of WNT signaling pathway, like [Source:NCBI gene;Acc:100000094]	CABZ01041495.1	0.660956	0.0337577	0.993098
ENSDARG00000096422		BX324146.1	0.626563	0.0338856	0.995807
ENSDARG00000069017	elastin b [Source:ZFIN;Acc:ZDB-GENE-061212-2]	elnb	-1.77132	0.0339309	0.996084
ENSDARG00000103819	Histone H3.2 [Source:UniProtKB/Swiss-Prot;Acc:Q4QRF4]	CU459186.4	2.33523	0.0340926	0.999774
ENSDARG00000091585	kinesin family member 28 [Source:ZFIN;Acc:ZDB-GENE-130530-1027]	kif28	-2.29177	0.0342063	1
ENSDARG00000114893	zinc finger protein 1038 [Source:ZFIN;Acc:ZDB-GENE-110914-24]	znf1038	1.30428	0.0342374	1
ENSDARG00000104833		CU693471.1	-1.59355	0.0343179	1
ENSDARG00000103144	protein phosphatase 1, regulatory subunit 21 [Source:NCBI gene;Acc:492333]	ppp1r21	0.344697	0.0344624	1
ENSDARG00000053746	oxysterol-binding protein-related protein 1-like [Source:NCBI gene;Acc:100331149]	CABZ01084566.1	0.567413	0.0345134	1
ENSDARG00000101992	si:dkey-238k10.3 [Source:ZFIN;Acc:ZDB-GENE-070705-401]	si:dkey-238k10.3	1.1319	0.0345961	1
ENSDARG00000055331	aldehyde dehydrogenase 9 family, member A1a, tandem duplicate 2 [Source:ZFIN;Acc:ZDB-GENE-081104-507]	aldh9a1a.2	-1.2041	0.0347457	1
ENSDARG00000103648	zinc finger protein 536 [Source:ZFIN;Acc:ZDB-GENE-030616-624]	znf536	-0.40554	0.0347943	1
ENSDARG00000087743	si:dkey-156k2.8 [Source:ZFIN;Acc:ZDB-GENE-110914-111]	si:dkey-156k2.8	2.88296	0.0348053	1
ENSDARG00000026548	cytochrome P450, family 2, subfamily U, polypeptide 1 [Source:ZFIN;Acc:ZDB-GENE-070730-1]	cyp2u1	-1.12959	0.0348194	1
ENSDARG00000008191	transmembrane protein with EGF-like and two follistatin-like domains 1a [Source:ZFIN;Acc:ZDB-GENE-070912-294]	tmeff1a	-0.991984	0.0348668	1
ENSDARG00000087426	si:ch211-151p13.8 [Source:ZFIN;Acc:ZDB-GENE-141212-230]	si:ch211-151p13.8	-0.570936	0.0349933	1
ENSDARG00000113654	uncharacterized LOC100149327 [Source:NCBI gene;Acc:100149327]	CU861574.1	4.2184	0.0350447	1
ENSDARG00000098601	olfactory receptor class A related 1 [Source:NCBI gene;Acc:553133]	ora1	-1.62825	0.0352743	1
ENSDARG00000059853	mannosidase beta like [Source:ZFIN;Acc:ZDB-GENE-161222-1]	manbal	0.397084	0.0353042	1
ENSDARG00000010008	vimentin [Source:ZFIN;Acc:ZDB-GENE-011212-3]	vim	0.524841	0.0354507	1
ENSDARG00000103119	si:dkeyp-33c10.7 [Source:ZFIN;Acc:ZDB-GENE-070705-538]	si:dkeyp-33c10.7	-4.0878	0.0355334	1
ENSDARG00000096829	biliverdin reductase B [Source:ZFIN;Acc:ZDB-GENE-030131-1516]	blvrb	0.603207	0.0355834	1
ENSDARG00000077698	radical S-adenosyl methionine domain containing 1 [Source:NCBI gene;Acc:565897]	rsad1	0.951524	0.0357022	1
ENSDARG00000099301	cell division cycle 37 homolog (S. cerevisiae) [Source:ZFIN;Acc:ZDB-GENE-040426-940]	cdc37	0.307172	0.0357359	1
ENSDARG00000100055	TOX high mobility group box family member 2 [Source:ZFIN;Acc:ZDB-GENE-040426-2095]	tox2	-0.378583	0.0358346	1
ENSDARG00000078618	inositol polyphosphate-5-phosphatase Kb [Source:ZFIN;Acc:ZDB-GENE-100408-3]	inpp5kb	0.370434	0.0358632	1
ENSDARG00000004297	interferon regulatory factor 2 binding protein-like [Source:ZFIN;Acc:ZDB-GENE-040426-1968]	irf2bpl	-0.377886	0.0359607	1
ENSDARG00000093629	si:ch211-106h4.4 [Source:ZFIN;Acc:ZDB-GENE-070705-14]	si:ch211-106h4.4	1.72653	0.0359616	1
ENSDARG00000098392	lymphocyte antigen 6 family member pge [Source:ZFIN;Acc:ZDB-GENE-141216-463]	ly6pge	0.364981	0.0362782	1
ENSDARG00000045789	SLIT-ROBO Rho GTPase activating protein 1b [Source:ZFIN;Acc:ZDB-GENE-041210-103]	srgap1b	-1.14378	0.036321	1
ENSDARG00000098788	protocadherin 2 gamma 28 [Source:ZFIN;Acc:ZDB-GENE-050610-19]	pcdh2g28	0.301401	0.036331	1
ENSDARG00000053248	internexin neuronal intermediate filament protein, alpha b [Source:ZFIN;Acc:ZDB-GENE-990415-83]	inab	-0.450723	0.036469	1
ENSDARG00000068280	growth factor receptor-bound protein 14 [Source:NCBI gene;Acc:100334415]	GRB14	1.38363	0.0364724	1
ENSDARG00000077349	sortilin related VPS10 domain containing receptor 3b [Source:ZFIN;Acc:ZDB-GENE-131121-455]	sorcs3b	-1.33666	0.0365451	1
ENSDARG00000104090	JunE proto-oncogene, AP-1 transcription factor subunit [Source:NCBI gene;Acc:767776]	june	0.496129	0.0366262	1
ENSDARG00000101206	zgc:113363 [Source:ZFIN;Acc:ZDB-GENE-050327-7]	zgc:113363	0.980161	0.0367011	1
ENSDARG00000028721	mitogen-activated protein kinase 14b [Source:NCBI gene;Acc:266756]	mapk14b	0.406091	0.0367723	1
ENSDARG00000013134	peripherin 2-like a [Source:ZFIN;Acc:ZDB-GENE-130530-548]	prph2la	0.399478	0.0369346	1
ENSDARG00000101249	zgc:165555 [Source:ZFIN;Acc:ZDB-GENE-070620-17]	zgc:165555	4.08802	0.0372276	1
ENSDARG00000114221		BX005022.2	1.97972	0.0372601	1
ENSDARG00000016480	solute carrier family 17 member 7a [Source:ZFIN;Acc:ZDB-GENE-050105-5]	slc17a7a	0.374984	0.0372677	1
ENSDARG00000113713	zinc finger protein 1103 [Source:ZFIN;Acc:ZDB-GENE-110914-45]	znf1103	3.30911	0.0373825	1
ENSDARG00000116556	im:7142702 [Source:ZFIN;Acc:ZDB-GENE-050411-48]	im:7142702	-0.830332	0.0374225	1
ENSDARG00000025338	hydroxyacylglutathione hydrolase [Source:NCBI gene;Acc:336977]	hagh	0.440545	0.0375441	1
ENSDARG00000103337	ribosomal RNA processing 1 [Source:ZFIN;Acc:ZDB-GENE-030131-9837]	rrp1	0.344695	0.0377501	1
ENSDARG00000089372	CDC-like kinase 4a [Source:ZFIN;Acc:ZDB-GENE-030131-576]	clk4a	0.391095	0.0379047	1
ENSDARG00000098444	si:dkey-3h2.4 [Source:ZFIN;Acc:ZDB-GENE-070705-466]	si:dkey-3h2.4	1.47614	0.038118	1
ENSDARG00000106138		BX855618.1	-2.32362	0.0381574	1
ENSDARG00000058861	nicalin [Source:NCBI gene;Acc:336844]	ncln	-0.312472	0.038498	1
ENSDARG00000096716	H6 family homeobox 3b [Source:ZFIN;Acc:ZDB-GENE-130603-102]	hmx3b	-2.96931	0.0385646	1
ENSDARG00000076826	dipeptidyl-peptidase 6a [Source:ZFIN;Acc:ZDB-GENE-090918-4]	dpp6a	-0.924829	0.0385697	1
ENSDARG00000023062	cellular communication network factor 1 [Source:ZFIN;Acc:ZDB-GENE-040426-3]	ccn1	-0.770943	0.0385907	1
ENSDARG00000096875		BX294110.2	1.95303	0.0387228	1
ENSDARG00000068434	H3 histone, family 3B.1 [Source:ZFIN;Acc:ZDB-GENE-050417-65]	h3f3b.1	-0.298801	0.0387524	1
ENSDARG00000112047		CT583728.14	1.81734	0.0387538	1
ENSDARG00000074697	neural proliferation, differentiation and control, 1a [Source:ZFIN;Acc:ZDB-GENE-031204-31]	npdc1a	0.407301	0.0388341	1
ENSDARG00000101212		CU681841.1	0.45906	0.0388583	1
ENSDARG00000010789	homer scaffold protein 3b [Source:ZFIN;Acc:ZDB-GENE-040426-739]	homer3b	-0.358615	0.0388825	1
ENSDARG00000074628	si:dkey-10o6.2 [Source:ZFIN;Acc:ZDB-GENE-070705-284]	si:dkey-10o6.2	1.99356	0.0388848	1
ENSDARG00000102488		FO704745.1	-4.09362	0.03895	1
ENSDARG00000007892	programmed cell death 2 [Source:ZFIN;Acc:ZDB-GENE-040426-1236]	pdcd2	0.882012	0.038965	1
ENSDARG00000115862	VAMP (vesicle-associated membrane protein)-associated protein A, like [Source:ZFIN;Acc:ZDB-GENE-040718-281]	vapal	0.364935	0.0390784	1
ENSDARG00000020814	Fas apoptotic inhibitory molecule b [Source:ZFIN;Acc:ZDB-GENE-040718-91]	faimb	0.37837	0.0391024	1
ENSDARG00000077596	PHD finger protein 24 [Source:ZFIN;Acc:ZDB-GENE-091204-154]	phf24	-0.346853	0.0392154	1
ENSDARG00000038728	cholesterol 25-hydroxylase like 2 [Source:NCBI gene;Acc:100136851]	ch25hl2	-2.73875	0.0392928	1
ENSDARG00000109649		BX571720.2	1.37225	0.0393416	1
ENSDARG00000088408	si:ch211-171h4.7 [Source:ZFIN;Acc:ZDB-GENE-120215-25]	si:ch211-171h4.7	-2.1622	0.039373	1
ENSDARG00000101967	sulfotransferase family 4A, member 1 [Source:ZFIN;Acc:ZDB-GENE-060421-2705]	sult4a1	-0.470461	0.0395101	1
ENSDARG00000098519		BX321870.1	2.43087	0.0395191	1
ENSDARG00000104142	si:dkey-15h8.10 [Source:ZFIN;Acc:ZDB-GENE-050208-706]	si:dkey-15h8.10	1.39712	0.039551	1
ENSDARG00000111046	zinc finger protein 1116 [Source:ZFIN;Acc:ZDB-GENE-110914-47]	znf1116	1.69285	0.0395568	1
ENSDARG00000004939	metadherin b [Source:ZFIN;Acc:ZDB-GENE-090929-2]	mtdhb	0.324889	0.039611	1
ENSDARG00000076434	si:dkey-191m6.4 [Source:ZFIN;Acc:ZDB-GENE-121214-182]	ARHGAP22	-0.618515	0.0398127	1
ENSDARG00000075727	microtubule-associated protein 1 light chain 3 gamma, like [Source:ZFIN;Acc:ZDB-GENE-140819-1]	map1lc3cl	1.92588	0.0398918	1
ENSDARG00000032849	N-myc downstream regulated 1a [Source:ZFIN;Acc:ZDB-GENE-030826-34]	ndrg1a	0.3184	0.0399909	1
ENSDARG00000109513		CR339054.7	0.727629	0.0400158	1
ENSDARG00000100723	zinc finger protein 1097 [Source:ZFIN;Acc:ZDB-GENE-110914-20]	znf1097	1.76537	0.0400359	1
ENSDARG00000053003	solute carrier family 35 member F1 [Source:ZFIN;Acc:ZDB-GENE-060503-463]	slc35f1	-0.841048	0.0400556	1
ENSDARG00000025106	protein phosphatase 3, catalytic subunit, beta isozyme [Source:ZFIN;Acc:ZDB-GENE-050417-406]	ppp3cb	-0.350214	0.0401404	1
ENSDARG00000098269	solute carrier family 1 member 9 [Source:ZFIN;Acc:ZDB-GENE-101111-9]	slc1a9	0.602493	0.0401742	1
ENSDARG00000060068	family with sequence similarity 98 member B [Source:ZFIN;Acc:ZDB-GENE-061201-63]	fam98b	0.42027	0.0401759	1
ENSDARG00000062720	protocadherin 1a [Source:ZFIN;Acc:ZDB-GENE-091116-32]	pcdh1a	-0.469128	0.0403122	1
ENSDARG00000104758	zgc:194981 [Source:ZFIN;Acc:ZDB-GENE-081022-170]	zgc:194981	0.923003	0.0404269	1
ENSDARG00000112015	LIM domain containing 2 [Source:HGNC Symbol;Acc:HGNC:28142]	LIMD2	-1.47915	0.0404555	1
ENSDARG00000089875	zgc:173705 [Source:ZFIN;Acc:ZDB-GENE-080212-6]	zgc:173705	1.40306	0.0405325	1
ENSDARG00000095893	si:dkey-85n7.7 [Source:ZFIN;Acc:ZDB-GENE-110408-52]	si:dkey-85n7.7	1.36551	0.0405331	1
ENSDARG00000039602	atonal bHLH transcription factor 1c [Source:ZFIN;Acc:ZDB-GENE-090805-1]	atoh1c	-1.75294	0.0406416	1
ENSDARG00000041550	Pim proto-oncogene, serine/threonine kinase, related 138 [Source:ZFIN;Acc:ZDB-GENE-041014-153]	pimr138	1.40787	0.0406433	1
ENSDARG00000079586	gamma-aminobutyric acid type A receptor beta2 subunit a [Source:ZFIN;Acc:ZDB-GENE-030131-8196]	gabrb2a	-0.640101	0.0408813	1
ENSDARG00000033950	laminin, beta 2-like [Source:ZFIN;Acc:ZDB-GENE-030131-4205]	lamb2l	-0.373182	0.0410312	1
ENSDARG00000103476	transient receptor potential cation channel, subfamily M, member 1b [Source:ZFIN;Acc:ZDB-GENE-070424-31]	trpm1b	0.334161	0.0410401	1
ENSDARG00000117619		CABZ01079804.1	2.18095	0.0411143	1
ENSDARG00000092142		BX663503.1	0.392074	0.0412042	1
ENSDARG00000104259	RAB26, member RAS oncogene family [Source:NCBI gene;Acc:101885743]	RAB26	0.944435	0.0412326	1
ENSDARG00000063126	glucuronidase, beta [Source:ZFIN;Acc:ZDB-GENE-070705-256]	gusb	0.398236	0.0413945	1
ENSDARG00000114695	heme oxygenase 2a [Source:ZFIN;Acc:ZDB-GENE-040914-13]	hmox2a	0.408038	0.0414308	1
ENSDARG00000057317	nexilin (F actin binding protein) [Source:ZFIN;Acc:ZDB-GENE-041114-92]	nexn	0.302531	0.0414449	1
ENSDARG00000071670	translation machinery associated 7 homolog [Source:NCBI gene;Acc:768290]	tma7	0.337039	0.0415188	1
ENSDARG00000095217	zgc:66156 [Source:ZFIN;Acc:ZDB-GENE-040426-1554]	zgc:66156	3.42052	0.0416579	1
ENSDARG00000100823	selenoprotein K [Source:NCBI gene;Acc:791738]	selenok	0.398208	0.04173	1
ENSDARG00000077468	si:ch73-206p6.1 [Source:ZFIN;Acc:ZDB-GENE-030131-5048]	si:ch73-206p6.1	0.385845	0.041872	1
ENSDARG00000061736	ankyrin 3a [Source:ZFIN;Acc:ZDB-GENE-060621-1]	ank3a	-0.325456	0.0419285	1
ENSDARG00000110860	si:dkey-9i5.2 [Source:ZFIN;Acc:ZDB-GENE-110914-61]	si:dkey-9i5.2	1.49519	0.0419632	1
ENSDARG00000100819		BX548164.2	1.29792	0.0420687	1
ENSDARG00000015404	ADP ribosylation factor like GTPase 3, like 2 [Source:ZFIN;Acc:ZDB-GENE-040426-1678]	arl3l2	0.421196	0.0420768	1
ENSDARG00000011273	T cell leukemia homeobox 2 [Source:ZFIN;Acc:ZDB-GENE-020208-1]	tlx2	-1.81339	0.042121	1
ENSDARG00000043465	ATPase H+ transporting V1 subunit B2 [Source:ZFIN;Acc:ZDB-GENE-030711-4]	atp6v1b2	-0.387779	0.0425133	1
ENSDARG00000043180	glycerol-3-phosphate dehydrogenase 1b [Source:ZFIN;Acc:ZDB-GENE-030131-3906]	gpd1b	0.680866	0.0425548	1
ENSDARG00000102156	si:dkey-264f17.4 [Source:ZFIN;Acc:ZDB-GENE-110913-112]	si:dkey-264f17.4	2.11538	0.0425693	1
ENSDARG00000097904	uncharacterized LOC108190093 [Source:NCBI gene;Acc:108190093]	BX927184.1	0.545108	0.0426074	1
ENSDARG00000097533		BX571880.1	1.09979	0.0427323	1
ENSDARG00000045123	5-oxoprolinase, ATP-hydrolysing [Source:ZFIN;Acc:ZDB-GENE-121214-293]	oplah	-0.416471	0.0428622	1
ENSDARG00000034883	acyl-CoA binding domain containing 5a [Source:NCBI gene;Acc:553674]	acbd5a	0.323572	0.0429278	1
ENSDARG00000096188		CT027801.2	3.31015	0.042991	1
ENSDARG00000034344	protocadherin 19 [Source:ZFIN;Acc:ZDB-GENE-030131-4218]	pcdh19	-0.342686	0.0431373	1
ENSDARG00000106601		CABZ01112344.1	0.998889	0.0432493	1
ENSDARG00000043719	complement component c3a, duplicate 6 [Source:ZFIN;Acc:ZDB-GENE-041212-2]	c3a.6	1.31691	0.0434439	1
ENSDARG00000090543	transmembrane protein 138 [Source:NCBI gene;Acc:100332440]	tmem138	0.423443	0.0435298	1
ENSDARG00000054543	SAM domain, SH3 domain and nuclear localisation signals 1a [Source:ZFIN;Acc:ZDB-GENE-030131-8639]	samsn1a	0.327071	0.043837	1
ENSDARG00000114086	zmp:0000001200 [Source:NCBI gene;Acc:566175]	DOCK9	0.390859	0.0438384	1
ENSDARG00000069356	adhesion G protein-coupled receptor L2a [Source:ZFIN;Acc:ZDB-GENE-000607-49]	adgrl2a	-0.330704	0.0438558	1
ENSDARG00000022340	ubiquitin-fold modifier conjugating enzyme 1 [Source:NCBI gene;Acc:445256]	ufc1	0.397279	0.0438781	1
ENSDARG00000113294	zinc finger protein 1146 [Source:ZFIN;Acc:ZDB-GENE-110914-152]	znf1146	-2.12739	0.043962	1
ENSDARG00000101800	L-seryl-tRNA(Sec) kinase-like [Source:NCBI gene;Acc:101884223]	CABZ01088271.1	0.596761	0.0439949	1
ENSDARG00000110836	transmembrane protein 14Ca [Source:NCBI gene;Acc:751728]	tmem14ca	0.486038	0.0440196	1
ENSDARG00000105450	si:ch211-63p21.1 [Source:ZFIN;Acc:ZDB-GENE-141216-443]	si:ch211-63p21.1	0.509959	0.0440731	1
ENSDARG00000042946	hook microtubule-tethering protein 1 [Source:NCBI gene;Acc:570393]	hook1	-0.631122	0.0441144	1
ENSDARG00000114894	zinc finger protein 1026 [Source:ZFIN;Acc:ZDB-GENE-110913-157]	znf1026	1.15023	0.0442466	1
ENSDARG00000113245		BX572627.1	2.15381	0.0442887	1
ENSDARG00000029372	RAS p21 protein activator 4 [Source:ZFIN;Acc:ZDB-GENE-060526-349]	rasa4	0.470886	0.0443113	1
ENSDARG00000077557	novel immune-type receptor 5 [Source:ZFIN;Acc:ZDB-GENE-020225-40]	nitr5	3.18147	0.0443441	1
ENSDARG00000037905	calcium channel, voltage-dependent, P/Q type, alpha 1A subunit, a [Source:ZFIN;Acc:ZDB-GENE-040724-26]	cacna1aa	-0.388586	0.0444026	1
ENSDARG00000020758	transmembrane protein 178 [Source:NCBI gene;Acc:767702]	tmem178	-0.708727	0.0447526	1
ENSDARG00000056134	C1q and TNF related 5 [Source:ZFIN;Acc:ZDB-GENE-050706-101]	c1qtnf5	-1.46226	0.0447539	1
ENSDARG00000076043	si:dkeyp-73d8.9 [Source:ZFIN;Acc:ZDB-GENE-070912-685]	si:dkeyp-73d8.9	2.12371	0.0447753	1
ENSDARG00000102385		CR774179.2	0.872945	0.0449718	1
ENSDARG00000028431	ADNP homeobox 2b [Source:ZFIN;Acc:ZDB-GENE-030131-5930]	adnp2b	-0.33533	0.0450913	1
ENSDARG00000101772		CT956002.1	3.32136	0.0451509	1
ENSDARG00000103704	corticotropin releasing hormone receptor 2 [Source:NCBI gene;Acc:100002312]	crhr2	3.07451	0.0451557	1
ENSDARG00000112370		FQ377918.1	1.13522	0.0451777	1
ENSDARG00000104864	kelch domain containing 2 [Source:ZFIN;Acc:ZDB-GENE-070410-69]	klhdc2	0.505632	0.0451906	1
ENSDARG00000070542	v-maf avian musculoaponeurotic fibrosarcoma oncogene homolog Bb [Source:ZFIN;Acc:ZDB-GENE-010605-4]	mafbb	0.723072	0.0453247	1
ENSDARG00000116500	E3 ubiquitin-protein ligase RBBP6-like [Source:NCBI gene;Acc:100536005]	BX005361.6	4.22531	0.0453303	1
ENSDARG00000110100	si:ch73-92e7.4 [Source:ZFIN;Acc:ZDB-GENE-081031-48]	si:ch73-92e7.4	0.842968	0.0453326	1
ENSDARG00000117375		BX005399.13	4.22529	0.0453435	1
ENSDARG00000113320	si:dkey-88n24.5 [Source:ZFIN;Acc:ZDB-GENE-041014-85]	si:dkey-88n24.5	1.12221	0.045444	1
ENSDARG00000074581	adducin 2 (beta) [Source:ZFIN;Acc:ZDB-GENE-080718-4]	add2	-0.327428	0.0455802	1
ENSDARG00000007396	Rho family GTPase 3b [Source:ZFIN;Acc:ZDB-GENE-040718-331]	rnd3b	-0.61048	0.0457018	1
ENSDARG00000002405	si:ch211-225b11.1 [Source:ZFIN;Acc:ZDB-GENE-060531-39]	si:ch211-225b11.1	0.617028	0.0457113	1
ENSDARG00000069295	BCL6A transcription repressor b [Source:ZFIN;Acc:ZDB-GENE-030131-7523]	bcl6ab	0.674434	0.0457442	1
ENSDARG00000103536		BX546503.1	2.488	0.0458358	1
ENSDARG00000098929	testis expressed 15 [Source:ZFIN;Acc:ZDB-GENE-091204-395]	tex15	1.53381	0.0459815	1
ENSDARG00000105444	histone cluster 1 H2A family member 11 [Source:ZFIN;Acc:ZDB-GENE-081205-1]	hist1h2a11	1.57342	0.0460181	1
ENSDARG00000097180	si:dkey-7i4.21 [Source:ZFIN;Acc:ZDB-GENE-131121-50]	si:dkey-7i4.21	2.54932	0.046037	1
ENSDARG00000002217	short coiled-coil protein b [Source:NCBI gene;Acc:791709]	scocb	0.457552	0.0462645	1
ENSDARG00000042934	cellular communication network factor 2a [Source:ZFIN;Acc:ZDB-GENE-030131-102]	ccn2a	-0.879979	0.0464315	1
ENSDARG00000074590	WD repeat containing planar cell polarity effector [Source:ZFIN;Acc:ZDB-GENE-100405-4]	wdpcp	0.732214	0.0464436	1
ENSDARG00000096461		CR382294.1	2.31222	0.0464864	1
ENSDARG00000109604	zinc finger protein 1026 [Source:ZFIN;Acc:ZDB-GENE-110913-157]	znf1026	1.42206	0.0465065	1
ENSDARG00000096867	calmin [Source:ZFIN;Acc:ZDB-GENE-131127-546]	clmn	-0.672409	0.0465735	1
ENSDARG00000102162		BX005043.1	-2.82789	0.0466553	1
ENSDARG00000057790	ankyrin repeat domain 6a [Source:ZFIN;Acc:ZDB-GENE-120525-1]	ankrd6a	0.390418	0.046794	1
ENSDARG00000096686		CT573003.1	0.894286	0.0469426	1
ENSDARG00000111362		CABZ01050062.1	0.574252	0.0473301	1
ENSDARG00000053512	crystallin, beta B2 [Source:ZFIN;Acc:ZDB-GENE-060130-1]	crybb2	-1.05311	0.0475747	1
ENSDARG00000058631		CABZ01030107.1	1.34085	0.0476381	1
ENSDARG00000102415	scinderin like a [Source:ZFIN;Acc:ZDB-GENE-030131-2005]	scinla	-0.809232	0.0476482	1
ENSDARG00000108781	chromosome 17 C14orf132 homolog [Source:NCBI gene;Acc:103909003]	C17H14orf132	-0.83258	0.0476649	1
ENSDARG00000044975	keratin 94 [Source:ZFIN;Acc:ZDB-GENE-061027-116]	krt94	-1.05788	0.0476889	1
ENSDARG00000003564	deoxyhypusine hydroxylase/monooxygenase [Source:NCBI gene;Acc:321732]	dohh	0.373026	0.0478506	1
ENSDARG00000052063	collagen, type IV, alpha 5 (Alport syndrome) [Source:ZFIN;Acc:ZDB-GENE-030131-2281]	col4a5	-0.412772	0.0479358	1
ENSDARG00000079008	si:dkey-7f3.9 [Source:ZFIN;Acc:ZDB-GENE-100922-197]	si:dkey-7f3.9	-0.49736	0.0479459	1
ENSDARG00000098368	amyloid beta (A4) precursor-like protein 1 [Source:ZFIN;Acc:ZDB-GENE-040319-1]	aplp1	-0.380919	0.0481514	1
ENSDARG00000071636	novel protein similar to vertebrate amiloride-sensitive cation channel 2 neuronal (ACCN2) [Source:NCBI gene;Acc:100151078]	BX511034.2	-3.73208	0.0481991	1
ENSDARG00000021351	neurofilament, medium polypeptide a [Source:ZFIN;Acc:ZDB-GENE-050522-205]	nefma	-1.44225	0.0482778	1
ENSDARG00000113614		CABZ01092072.2	1.00488	0.0482832	1
ENSDARG00000113254	cytochrome c oxidase subunit 5B1 [Source:NCBI gene;Acc:100002384]	COX5B	0.793006	0.0485229	1
ENSDARG00000095902	si:ch211-57m13.10 [Source:ZFIN;Acc:ZDB-GENE-110411-264]	si:ch211-57m13.10	4.16753	0.0485418	1
ENSDARG00000031600	retinal degeneration 3, GUCY2D regulator [Source:ZFIN;Acc:ZDB-GENE-040724-103]	rd3	0.335923	0.0487779	1
ENSDARG00000098407		BX936393.2	-3.73838	0.0488786	1
ENSDARG00000068288	laminin, gamma 2 [Source:ZFIN;Acc:ZDB-GENE-110222-3]	lamc2	-1.16954	0.049072	1
ENSDARG00000113481	si:ch211-113a14.19 [Source:ZFIN;Acc:ZDB-GENE-121214-198]	si:ch211-113a14.19	2.1875	0.0490897	1
ENSDARG00000070770	hairy-related 4, tandem duplicate 3 [Source:ZFIN;Acc:ZDB-GENE-081030-7]	her4.3	1.37598	0.0491101	1
ENSDARG00000095692		BX927401.1	2.35588	0.0491968	1
ENSDARG00000075791	si:dkey-79f11.5 [Source:ZFIN;Acc:ZDB-GENE-030131-9145]	si:dkey-79f11.5	-3.91013	0.0492166	1
ENSDARG00000021405	chromodomain helicase DNA binding protein 3 [Source:ZFIN;Acc:ZDB-GENE-121031-4]	chd3	-0.478887	0.0492354	1
ENSDARG00000058815	Indian hedgehog signaling molecule b [Source:NCBI gene;Acc:30299]	ihhb	-1.59507	0.0492575	1
ENSDARG00000012311	myozenin 2a [Source:ZFIN;Acc:ZDB-GENE-040426-1880]	myoz2a	-3.18848	0.0495019	1
ENSDARG00000077405	PC4 and SFRS1 interacting protein 1b [Source:ZFIN;Acc:ZDB-GENE-030131-3273]	psip1b	0.294028	0.0495755	1
ENSDARG00000029480	sperm antigen with calponin homology and coiled-coil domains 1 [Source:ZFIN;Acc:ZDB-GENE-060526-207]	specc1	-0.535113	0.04968	1
ENSDARG00000079251	neuroligin 2b [Source:ZFIN;Acc:ZDB-GENE-090918-3]	nlgn2b	-0.521215	0.0497589	1
ENSDARG00000039579	complement factor D (adipsin) [Source:ZFIN;Acc:ZDB-GENE-050522-411]	cfd	-1.4088	0.049819	1
ENSDARG00000052899		CU550714.1	3.19559	0.049865	1
ENSDARG00000096736		CR749163.2	1.1059	0.0498686	1
ENSDARG00000056605	WW domain binding protein 2 [Source:ZFIN;Acc:ZDB-GENE-050522-137]	wbp2	0.327021	0.0499048	1
ENSDARG00000004702	interferon regulatory factor 2 binding protein 2a [Source:NCBI gene;Acc:335866]	irf2bp2a	0.292577	0.0499846	1
ENSDARG00000052450	heat shock protein, alpha-crystallin-related, b2 [Source:ZFIN;Acc:ZDB-GENE-050417-260]	hspb2	2.21681	0.0500232	1
ENSDARG00000020178	NOVA alternative splicing regulator 1 [Source:ZFIN;Acc:ZDB-GENE-060526-113]	nova1	-1.22714	0.0500919	1
ENSDARG00000104403	organic solute carrier partner 1a [Source:ZFIN;Acc:ZDB-GENE-080204-2]	oscp1a	0.716213	0.0502304	1
ENSDARG00000103730	vestigial-like family member 4b [Source:ZFIN;Acc:ZDB-GENE-040426-2445]	vgll4b	0.311053	0.0502322	1
ENSDARG00000104064	si:ch211-127b6.2 [Source:ZFIN;Acc:ZDB-GENE-081103-37]	si:ch211-127b6.2	1.73289	0.0502338	1
ENSDARG00000078187	solute carrier family 12 member 5b [Source:ZFIN;Acc:ZDB-GENE-080707-1]	slc12a5b	-0.633805	0.0502575	1
ENSDARG00000097000	uncharacterized LOC101884792 [Source:NCBI gene;Acc:101884792]	BX890558.1	2.06568	0.0503358	1
ENSDARG00000017602	cyclin G2 [Source:ZFIN;Acc:ZDB-GENE-021016-1]	ccng2	0.319157	0.0504502	1
ENSDARG00000095539	si:dkeyp-82a1.8 [Source:ZFIN;Acc:ZDB-GENE-081104-479]	si:dkeyp-82a1.8	-3.75337	0.0505451	1
ENSDARG00000105345	zgc:173552 [Source:ZFIN;Acc:ZDB-GENE-080220-24]	zgc:173552	2.19244	0.0506217	1
ENSDARG00000062415	catenin (cadherin-associated protein), delta 2a [Source:ZFIN;Acc:ZDB-GENE-030616-60]	ctnnd2a	-0.385719	0.0506813	1
ENSDARG00000037588	basic helix-loop-helix family, member e23 [Source:ZFIN;Acc:ZDB-GENE-050913-22]	bhlhe23	0.297461	0.0507436	1
ENSDARG00000105088	teneurin transmembrane protein 4 [Source:NCBI gene;Acc:30156]	tenm4	-0.320238	0.0508526	1
ENSDARG00000035990	Cbp/p300-interacting transactivator, with Glu/Asp-rich carboxy-terminal domain, 4a [Source:ZFIN;Acc:ZDB-GENE-030131-7661]	cited4a	0.306707	0.0509656	1
ENSDARG00000054331	cellular communication network factor 4a [Source:ZFIN;Acc:ZDB-GENE-070705-178]	ccn4a	1.34446	0.0510191	1
ENSDARG00000004680	DnaJ heat shock protein family (Hsp40) member B6a [Source:ZFIN;Acc:ZDB-GENE-040718-45]	dnajb6a	0.324483	0.0510796	1
ENSDARG00000078324	si:ch211-263k4.2 [Source:ZFIN;Acc:ZDB-GENE-081104-207]	si:ch211-263k4.2	-0.593551	0.0511373	1
ENSDARG00000094132	insulin-like growth factor 1 [Source:ZFIN;Acc:ZDB-GENE-010607-2]	igf1	0.534659	0.051139	1
ENSDARG00000056374	NADPH oxidase organizer 1b [Source:ZFIN;Acc:ZDB-GENE-101203-1]	noxo1b	1.20831	0.0511746	1
ENSDARG00000058537	si:dkey-102c8.2 [Source:ZFIN;Acc:ZDB-GENE-050208-329]	si:dkey-102c8.2	1.09615	0.0512041	1
ENSDARG00000022139	osteoclast stimulatory transmembrane protein [Source:ZFIN;Acc:ZDB-GENE-050327-65]	ocstamp	1.94384	0.0512093	1
ENSDARG00000101201	si:dkey-207b20.2 [Source:ZFIN;Acc:ZDB-GENE-141216-467]	si:dkey-207b20.2	4.23577	0.0512839	1
ENSDARG00000087518	si:dkey-261p22.1 [Source:ZFIN;Acc:ZDB-GENE-081103-60]	si:dkey-261p22.1	1.36282	0.0512909	1
ENSDARG00000028012	thiopurine S-methyltransferase, tandem duplicate 2 [Source:ZFIN;Acc:ZDB-GENE-041010-177]	tpmt.2	0.842852	0.0513068	1
ENSDARG00000026599	engrailed homeobox 2a [Source:NCBI gene;Acc:30243]	en2a	-1.32252	0.0513175	1
ENSDARG00000069335	BCL6B transcription repressor [Source:ZFIN;Acc:ZDB-GENE-120907-1]	bcl6b	0.906925	0.0513451	1
ENSDARG00000069826	crystallin, gamma M2d15 [Source:ZFIN;Acc:ZDB-GENE-040718-322]	crygm2d15	0.321642	0.0513723	1
ENSDARG00000089794	si:dkeyp-101e12.1 [Source:ZFIN;Acc:ZDB-GENE-091113-32]	si:dkeyp-101e12.1	1.79115	0.0514346	1
ENSDARG00000096833		CR391963.1	0.77234	0.051492	1
ENSDARG00000015662	phospholipase A2, group XIIB [Source:ZFIN;Acc:ZDB-GENE-040426-2771]	pla2g12b	1.92987	0.0516491	1
ENSDARG00000095347	si:dkeyp-72h1.1 [Source:ZFIN;Acc:ZDB-GENE-050208-447]	si:dkeyp-72h1.1	-1.29125	0.0518858	1
ENSDARG00000069989	basonuclin 2 [Source:ZFIN;Acc:ZDB-GENE-030131-5784]	bnc2	-0.380205	0.0519115	1
ENSDARG00000056084	immunoglobin superfamily, member 21b [Source:ZFIN;Acc:ZDB-GENE-070424-59]	igsf21b	0.332865	0.0519945	1
ENSDARG00000078123	SLIT and NTRK-like family, member 3a [Source:ZFIN;Acc:ZDB-GENE-130226-1]	slitrk3a	-0.776512	0.0521278	1
ENSDARG00000100642	phospholipid phosphatase related 1 [Source:HGNC Symbol;Acc:HGNC:25993]	plppr1	0.416214	0.0521485	1
ENSDARG00000038076	reactive oxygen species modulator 1 [Source:NCBI gene;Acc:393770]	romo1	0.308642	0.0523655	1
ENSDARG00000069116	translocase of inner mitochondrial membrane 10 homolog (yeast) [Source:NCBI gene;Acc:436951]	timm10	0.407176	0.0524901	1
ENSDARG00000091130	potassium voltage-gated channel, KQT-like subfamily, member 2b [Source:ZFIN;Acc:ZDB-GENE-120130-1]	kcnq2b	-0.654858	0.0525653	1
ENSDARG00000091576	si:rp71-1d10.5 [Source:NCBI gene;Acc:555988]	TMEM216	0.742232	0.0526066	1
ENSDARG00000098432	PAF1 homolog, Paf1/RNA polymerase II complex component [Source:NCBI gene;Acc:553020]	paf1	0.315705	0.0527307	1
ENSDARG00000044319	follistatin-like 4 [Source:ZFIN;Acc:ZDB-GENE-070127-3]	fstl4	-0.55572	0.0528346	1
ENSDARG00000058222	membrane protein, palmitoylated 4a (MAGUK p55 subfamily member 4) [Source:ZFIN;Acc:ZDB-GENE-070912-523]	mpp4a	0.464107	0.05293	1
ENSDARG00000076872	membrane protein, palmitoylated 4-like [Source:ZFIN;Acc:ZDB-GENE-091118-7]	mpp4l	0.514452	0.0529461	1
ENSDARG00000102917		CR388095.1	1.57505	0.0529586	1
ENSDARG00000097320		CR848791.3	1.7989	0.0530127	1
ENSDARG00000026926	retinal outer segment membrane protein 1b [Source:ZFIN;Acc:ZDB-GENE-040426-1073]	rom1b	0.451849	0.0530366	1
ENSDARG00000104663	zgc:103755 [Source:ZFIN;Acc:ZDB-GENE-041010-101]	zgc:103755	0.851175	0.053058	1
ENSDARG00000044015	GDNF family receptor alpha 2b [Source:ZFIN;Acc:ZDB-GENE-091204-26]	gfra2b	-1.04288	0.0530706	1
ENSDARG00000105434	glutaredoxin and cysteine rich domain containing 1 a [Source:ZFIN;Acc:ZDB-GENE-160113-42]	grxcr1a	0.816497	0.0532569	1
ENSDARG00000092842	si:ch211-93g21.2 [Source:ZFIN;Acc:ZDB-GENE-060503-799]	si:ch211-93g21.2	4.05246	0.0532909	1
ENSDARG00000013491	mitogen-activated protein kinase kinase kinase 9 [Source:ZFIN;Acc:ZDB-GENE-081113-5]	map3k9	-0.613479	0.0533375	1
ENSDARG00000088842	si:dkey-192j17.1 [Source:ZFIN;Acc:ZDB-GENE-091113-38]	KCNB2	-1.18413	0.0536835	1
ENSDARG00000092918	corticotropin releasing hormone receptor 2 [Source:NCBI gene;Acc:100002312]	crhr2	1.32603	0.0536836	1
ENSDARG00000025903	lectin, galactoside-binding, soluble, 9 (galectin 9)-like 1 [Source:ZFIN;Acc:ZDB-GENE-030131-9543]	lgals9l1	0.876867	0.0537042	1
ENSDARG00000006603	cysteine and glycine-rich protein 1a [Source:ZFIN;Acc:ZDB-GENE-030909-4]	csrp1a	-0.707608	0.0541878	1
ENSDARG00000090901	si:ch211-256e16.11 [Source:ZFIN;Acc:ZDB-GENE-131127-41]	si:ch211-256e16.11	1.31881	0.0542407	1
ENSDARG00000078335	angiomotin [Source:ZFIN;Acc:ZDB-GENE-030131-7487]	amot	-0.712791	0.0542589	1
ENSDARG00000097448		CR925728.3	4.06043	0.0543433	1
ENSDARG00000086214	neurotrophic tyrosine kinase, receptor, type 3b [Source:ZFIN;Acc:ZDB-GENE-010126-4]	ntrk3b	-0.811289	0.054369	1
ENSDARG00000087164	crystallin, gamma M2d4 [Source:ZFIN;Acc:ZDB-GENE-060918-3]	crygm2d4	0.282669	0.0544143	1
ENSDARG00000025607	interferon phi 1 [Source:ZFIN;Acc:ZDB-GENE-030721-3]	ifnphi1	1.40147	0.0544314	1
ENSDARG00000105091	zgc:174944 [Source:ZFIN;Acc:ZDB-GENE-080207-2]	zgc:174944	1.97046	0.0545331	1
ENSDARG00000058207	abl-interactor 2a [Source:ZFIN;Acc:ZDB-GENE-060929-192]	abi2a	0.376782	0.0546463	1
ENSDARG00000060680	si:ch73-127m5.1 [Source:ZFIN;Acc:ZDB-GENE-130531-25]	si:ch73-127m5.1	-0.614076	0.0547344	1
ENSDARG00000076262	POU class 3 homeobox 2b [Source:NCBI gene;Acc:30397]	pou3f2b	-1.5424	0.0549438	1
ENSDARG00000074558	contactin associated protein like 2b [Source:ZFIN;Acc:ZDB-GENE-070912-26]	cntnap2b	-0.388863	0.0550142	1
ENSDARG00000105287	membrane protein, palmitoylated 1 [Source:ZFIN;Acc:ZDB-GENE-031113-4]	mpp1	0.457504	0.0550226	1
ENSDARG00000022303	HIG1 hypoxia inducible domain family, member 1A [Source:ZFIN;Acc:ZDB-GENE-030826-15]	higd1a	0.343654	0.0550616	1
ENSDARG00000071679	myeloid-derived growth factor [Source:ZFIN;Acc:ZDB-GENE-040718-183]	mydgf	-0.443035	0.0551032	1
ENSDARG00000109648	si:ch211-147m6.1 [Source:ZFIN;Acc:ZDB-GENE-131120-57]	si:ch211-147m6.1	1.27537	0.0551778	1
ENSDARG00000075053	saccharopine dehydrogenase a, tandem duplicate 2 [Source:ZFIN;Acc:ZDB-GENE-080212-12]	sccpdha.2	-1.49039	0.0553287	1
ENSDARG00000116857		CR933812.1	1.23454	0.0553487	1
ENSDARG00000053480	aquaporin 9b [Source:ZFIN;Acc:ZDB-GENE-070911-1]	aqp9b	-0.444831	0.0554601	1
ENSDARG00000017606	SYS1 golgi trafficking protein [Source:ZFIN;Acc:ZDB-GENE-030131-8283]	sys1	0.397777	0.0558439	1
ENSDARG00000027903	ADAMTS-like 3 [Source:ZFIN;Acc:ZDB-GENE-121030-8]	adamtsl3	-1.05708	0.0559009	1
ENSDARG00000041910	zinc finger protein 512 [Source:ZFIN;Acc:ZDB-GENE-041014-346]	znf512	-0.834957	0.0559201	1
ENSDARG00000099597	si:dkey-211i20.5 [Source:ZFIN;Acc:ZDB-GENE-120709-55]	si:dkey-211i20.5	1.47473	0.0559563	1
ENSDARG00000045601	cation/H+ exchanger protein 1 [Source:ZFIN;Acc:ZDB-GENE-030131-3044]	cax1	-0.612146	0.0559855	1
ENSDARG00000101917	polyamine modulated factor 1 binding protein 1 [Source:ZFIN;Acc:ZDB-GENE-131127-619]	pmfbp1	-1.1949	0.0560759	1
ENSDARG00000097663		BX324206.3	1.8595	0.0560958	1
ENSDARG00000060092	zgc:165481 [Source:ZFIN;Acc:ZDB-GENE-070615-21]	zgc:165481	-0.931975	0.0561038	1
ENSDARG00000074466	glycerophosphodiester phosphodiesterase domain containing 3a [Source:ZFIN;Acc:ZDB-GENE-040426-2279]	gdpd3a	-0.512893	0.0561354	1
ENSDARG00000105717		BX957362.2	2.00863	0.0561676	1
ENSDARG00000115724	Pim proto-oncogene, serine/threonine kinase, related 84 [Source:ZFIN;Acc:ZDB-GENE-071003-2]	pimr84	2.60758	0.0563058	1
ENSDARG00000104966	si:dkey-238k10.3 [Source:ZFIN;Acc:ZDB-GENE-070705-401]	si:dkey-238k10.3	1.52849	0.056328	1
ENSDARG00000113045	solute carrier family 12 member 2-like [Source:NCBI gene;Acc:100537771]	CABZ01063543.1	-3.9517	0.0563295	1
ENSDARG00000105183		CT009487.2	-1.58956	0.0563793	1
ENSDARG00000075881	si:ch211-39k3.2 [Source:ZFIN;Acc:ZDB-GENE-070705-180]	SERF2	0.715746	0.0564302	1
ENSDARG00000073998	si:ch211-23l10.3 [Source:ZFIN;Acc:ZDB-GENE-091204-25]	si:ch211-23l10.3	0.806879	0.0564783	1
ENSDARG00000103574	rhodopsin [Source:HGNC Symbol;Acc:HGNC:10012]	RHO	0.682499	0.05649	1
ENSDARG00000077782	alkaline ceramidase 2 [Source:ZFIN;Acc:ZDB-GENE-121026-1]	acer2	0.829929	0.0565644	1
ENSDARG00000069951	eukaryotic translation elongation factor 1 alpha 1, like 2 [Source:ZFIN;Acc:ZDB-GENE-050706-188]	eef1a1l2	-0.77816	0.0566258	1
ENSDARG00000101828	si:dkey-16p6.1 [Source:ZFIN;Acc:ZDB-GENE-081103-43]	si:dkey-16p6.1	1.15859	0.0567614	1
ENSDARG00000098647	ankyrin repeat and death domain containing 1A [Source:ZFIN;Acc:ZDB-GENE-070615-8]	ankdd1a	-0.535683	0.057092	1
ENSDARG00000062217	potassium inwardly rectifying channel subfamily J member 3b [Source:ZFIN;Acc:ZDB-GENE-120215-38]	kcnj3b	-0.703583	0.0571656	1
ENSDARG00000105176	zgc:174890 [Source:ZFIN;Acc:ZDB-GENE-030131-6213]	zgc:174890	0.776234	0.057168	1
ENSDARG00000042837	ATPase Na+/K+ transporting subunit beta 3b [Source:ZFIN;Acc:ZDB-GENE-001127-1]	atp1b3b	-0.315713	0.0572479	1
ENSDARG00000111026		BX927193.2	1.24779	0.057254	1
ENSDARG00000100257	zgc:174314 [Source:ZFIN;Acc:ZDB-GENE-080213-5]	zgc:174314	1.16388	0.0572908	1
ENSDARG00000099195	immediate early response 2a [Source:NCBI gene;Acc:797137]	ier2a	0.51034	0.0573898	1
ENSDARG00000076126	actin alpha cardiac muscle 1a [Source:ZFIN;Acc:ZDB-GENE-040520-4]	actc1a	3.16896	0.0574783	1
ENSDARG00000114133	histone cluster 1 H2A family member 5 [Source:ZFIN;Acc:ZDB-GENE-131121-77]	hist1h2a5	1.56321	0.0575274	1
ENSDARG00000079305	hemoglobin alpha embryonic-3 [Source:ZFIN;Acc:ZDB-GENE-990706-3]	hbae3	0.413945	0.0575833	1
ENSDARG00000041358	leucine-rich repeat LGI family, member 3 [Source:ZFIN;Acc:ZDB-GENE-060217-4]	lgi3	-1.33502	0.0577259	1
ENSDARG00000036279	laminin, gamma 1 [Source:NCBI gene;Acc:286832]	lamc1	-0.370406	0.057744	1
ENSDARG00000089814	zinc finger protein 1042 [Source:ZFIN;Acc:ZDB-GENE-120703-14]	znf1042	1.18751	0.0577804	1
ENSDARG00000070603	heat shock protein 12A [Source:ZFIN;Acc:ZDB-GENE-031001-1]	hspa12a	-0.784711	0.0579005	1
ENSDARG00000095533	si:ch211-198c19.3 [Source:ZFIN;Acc:ZDB-GENE-100922-226]	si:ch211-198c19.3	1.02035	0.0579787	1
ENSDARG00000053431	si:ch211-257p13.3 [Source:ZFIN;Acc:ZDB-GENE-110914-108]	si:ch211-257p13.3	-0.770061	0.0579854	1
ENSDARG00000092257		BX510992.1	1.39293	0.0581918	1
ENSDARG00000086669	endothelin 3b [Source:ZFIN;Acc:ZDB-GENE-090313-235]	edn3b	-2.00428	0.0582917	1
ENSDARG00000060506	son of sevenless homolog 2 (Drosophila) [Source:ZFIN;Acc:ZDB-GENE-090319-5]	sos2	-0.358988	0.0583222	1
ENSDARG00000101225	cyclic nucleotide gated channel subunit beta 3, tandem duplicate 1 [Source:ZFIN;Acc:ZDB-GENE-090611-1]	cngb3.1	0.721763	0.0583271	1
ENSDARG00000092390	si:dkey-6f10.4 [Source:ZFIN;Acc:ZDB-GENE-041210-340]	si:dkey-6f10.4	2.60025	0.0583452	1
ENSDARG00000036764	HCLS1 associated protein X-1 [Source:ZFIN;Acc:ZDB-GENE-040718-26]	hax1	0.314659	0.0584682	1
ENSDARG00000075043	si:dkeyp-123h10.2 [Source:ZFIN;Acc:ZDB-GENE-090313-376]	si:dkeyp-123h10.2	-0.655	0.0584692	1
ENSDARG00000078485	syntaphilin a [Source:ZFIN;Acc:ZDB-GENE-081104-227]	snpha	-1.66546	0.0585878	1
ENSDARG00000071331	ryanodine receptor 3 [Source:ZFIN;Acc:ZDB-GENE-041001-165]	ryr3	-0.780273	0.0586928	1
ENSDARG00000102423	kynurenine--oxoglutarate transaminase 3-like [Source:NCBI gene;Acc:103911241]	KYAT3	-1.02312	0.0587115	1
ENSDARG00000108372		LO017648.1	0.536807	0.0588372	1
ENSDARG00000004187	zgc:122979 [Source:ZFIN;Acc:ZDB-GENE-051127-45]	zgc:122979	-0.746133	0.0588641	1
ENSDARG00000039145	plasminogen activator, urokinase b [Source:ZFIN;Acc:ZDB-GENE-030619-15]	plaub	0.803445	0.0591222	1
ENSDARG00000036045	proenkephalin b [Source:ZFIN;Acc:ZDB-GENE-030729-3]	penkb	1.08121	0.0592611	1
ENSDARG00000060638	si:ch211-276c2.2 [Source:ZFIN;Acc:ZDB-GENE-121214-77]	CLSTN2	0.509078	0.0592784	1
ENSDARG00000071223	zgc:158445 [Source:ZFIN;Acc:ZDB-GENE-061215-78]	zgc:158445	-3.74997	0.059328	1
ENSDARG00000040684	phospholipase C, delta 4b [Source:ZFIN;Acc:ZDB-GENE-080512-3]	plcd4b	0.716827	0.059331	1
ENSDARG00000105478	si:ch1073-153i20.5 [Source:ZFIN;Acc:ZDB-GENE-160113-104]	si:ch1073-153i20.5	2.1448	0.0593928	1
ENSDARG00000097159		BX664738.1	-1.23872	0.0594253	1
ENSDARG00000096172	zinc finger protein 1113 [Source:ZFIN;Acc:ZDB-GENE-110913-161]	znf1113	0.760317	0.0596157	1
ENSDARG00000095777	si:ch211-218h8.3 [Source:ZFIN;Acc:ZDB-GENE-120703-51]	si:ch211-218h8.3	3.89854	0.0596586	1
ENSDARG00000075632	RAD9 checkpoint clamp component B [Source:ZFIN;Acc:ZDB-GENE-040910-3]	rad9b	-3.72501	0.0597943	1
ENSDARG00000107441	tetratricopeptide repeat, ankyrin repeat and coiled-coil containing 2b [Source:NCBI gene;Acc:335127]	TANC2	-0.693235	0.0598236	1
ENSDARG00000074073	microtubule-associated protein 6b [Source:ZFIN;Acc:ZDB-GENE-130530-741]	map6b	-0.553026	0.0598563	1
ENSDARG00000099511		CABZ01034698.2	0.551742	0.0598653	1
ENSDARG00000038147	hemoglobin beta embryonic-3 [Source:ZFIN;Acc:ZDB-GENE-980526-287]	hbbe3	0.609006	0.0599731	1
ENSDARG00000074560	si:ch211-269c21.2 [Source:ZFIN;Acc:ZDB-GENE-090313-104]	CHST8	-0.896409	0.05998	1
ENSDARG00000014201	orthopedia homeobox a [Source:ZFIN;Acc:ZDB-GENE-070216-1]	otpa	-1.49644	0.0601045	1
ENSDARG00000062182	solute carrier family 22 member 7b, tandem duplicate 3 [Source:ZFIN;Acc:ZDB-GENE-131120-103]	slc22a7b.3	1.88032	0.0601506	1
ENSDARG00000117778	uncharacterized LOC110439861 [Source:NCBI gene;Acc:110439861]	LO017716.1	-2.67731	0.0602125	1
ENSDARG00000104370	endothelial cell-specific molecule 1 [Source:ZFIN;Acc:ZDB-GENE-060929-748]	esm1	0.859436	0.0603119	1
ENSDARG00000098754	si:ch211-156p11.1 [Source:ZFIN;Acc:ZDB-GENE-070912-120]	si:ch211-156p11.1	-2.76135	0.0603454	1
ENSDARG00000068456	transmembrane protein 91 [Source:ZFIN;Acc:ZDB-GENE-060503-581]	tmem91	-0.909808	0.0604454	1
ENSDARG00000030367	meteorin, glial cell differentiation regulator [Source:ZFIN;Acc:ZDB-GENE-050102-1]	metrn	-0.328168	0.0605063	1
ENSDARG00000101776	synaptotagmin XII [Source:ZFIN;Acc:ZDB-GENE-081022-147]	syt12	-0.748928	0.0605272	1
ENSDARG00000019772	si:ch1073-280e3.1 [Source:ZFIN;Acc:ZDB-GENE-110411-261]	si:ch1073-280e3.1	1.34175	0.0605288	1
ENSDARG00000105391	stereocilin [Source:ZFIN;Acc:ZDB-GENE-160114-58]	strc	-1.70392	0.0606603	1
ENSDARG00000078502	si:ch211-150o23.3 [Source:ZFIN;Acc:ZDB-GENE-060503-479]	si:ch211-150o23.3	0.752092	0.0606715	1
ENSDARG00000057323	E2F transcription factor 8 [Source:NCBI gene;Acc:565952]	e2f8	-0.343251	0.0607583	1
ENSDARG00000010482	proteoglycan 4a [Source:ZFIN;Acc:ZDB-GENE-030131-8295]	prg4a	0.892634	0.0607658	1
ENSDARG00000069630	tyrosine aminotransferase [Source:ZFIN;Acc:ZDB-GENE-030131-1144]	tat	1.15193	0.060847	1
ENSDARG00000115007		CU862020.1	-1.26655	0.0608748	1
ENSDARG00000036295	golgin A7 family, member Ba [Source:ZFIN;Acc:ZDB-GENE-050417-14]	golga7ba	0.317471	0.0610231	1
ENSDARG00000040178	hepatitis A virus cellular receptor 1 [Source:ZFIN;Acc:ZDB-GENE-040718-131]	havcr1	0.825518	0.0611512	1
ENSDARG00000094195		CR936371.1	2.50716	0.0612191	1
ENSDARG00000095809		dlg4b	1.03724	0.0613939	1
ENSDARG00000025891	short stature homeobox [Source:ZFIN;Acc:ZDB-GENE-051030-21]	shox	-1.14913	0.0614178	1
ENSDARG00000092493	si:dkeyp-44a8.2 [Source:ZFIN;Acc:ZDB-GENE-070705-542]	si:dkeyp-44a8.2	0.308395	0.0615002	1
ENSDARG00000087349	receptor accessory protein 6 [Source:NCBI gene;Acc:447918]	reep6	0.491717	0.061573	1
ENSDARG00000090170	RAB11 family interacting protein 4 (class II) a [Source:NCBI gene;Acc:436806]	rab11fip4a	-0.326257	0.0616583	1
ENSDARG00000077115	si:ch73-44m9.1 [Source:ZFIN;Acc:ZDB-GENE-081104-289]	si:ch73-44m9.1	1.16309	0.0617313	1
ENSDARG00000043035	calpain 3b [Source:ZFIN;Acc:ZDB-GENE-041001-149]	capn3b	-3.74728	0.0618862	1
ENSDARG00000117781		CABZ01073834.1	0.988274	0.0619927	1
ENSDARG00000105373		CABZ01058277.1	2.07089	0.0620943	1
ENSDARG00000095137	si:dkey-88l16.2 [Source:ZFIN;Acc:ZDB-GENE-091113-59]	si:dkey-88l16.2	4.15734	0.0621605	1
ENSDARG00000026630	MAP/microtubule affinity-regulating kinase 3b [Source:ZFIN;Acc:ZDB-GENE-060929-80]	mark3b	-0.297095	0.0622959	1
ENSDARG00000011818	basic leucine zipper transcription factor, ATF-like [Source:NCBI gene;Acc:564589]	batf	1.38001	0.0623549	1
ENSDARG00000010385	septin 4a [Source:ZFIN;Acc:ZDB-GENE-051120-87]	sept4a	0.305328	0.0624734	1
ENSDARG00000017591	FAT atypical cadherin 1a [Source:ZFIN;Acc:ZDB-GENE-050425-1]	fat1a	-0.28963	0.0625156	1
ENSDARG00000056453	actin filament associated protein 1-like 1b [Source:ZFIN;Acc:ZDB-GENE-061013-428]	afap1l1b	0.64248	0.0625886	1
ENSDARG00000040700	NGFI-A binding protein 1b (EGR1 binding protein 1) [Source:ZFIN;Acc:ZDB-GENE-081105-85]	nab1b	-1.01435	0.0627216	1
ENSDARG00000044251	RasGEF domain family, member 1Bb [Source:NCBI gene;Acc:445085]	rasgef1bb	0.356114	0.062871	1
ENSDARG00000099757	WD repeat domain 47b [Source:ZFIN;Acc:ZDB-GENE-121114-10]	wdr47b	-0.813031	0.0630158	1
ENSDARG00000098991	zinc finger protein 1095 [Source:ZFIN;Acc:ZDB-GENE-110913-124]	znf1095	1.02927	0.0630327	1
ENSDARG00000098305	si:ch211-76m11.8 [Source:ZFIN;Acc:ZDB-GENE-041210-280]	si:ch211-76m11.8	1.439	0.0630707	1
ENSDARG00000093024	si:ch211-213a13.2 [Source:ZFIN;Acc:ZDB-GENE-050208-551]	si:ch211-213a13.2	-0.830566	0.0631839	1
ENSDARG00000053323	zgc:112285 [Source:ZFIN;Acc:ZDB-GENE-050913-132]	zgc:112285	-0.523243	0.0631962	1
ENSDARG00000014321	engrailed homeobox 1a [Source:NCBI gene;Acc:30244]	en1a	-1.34728	0.0632177	1
ENSDARG00000025859	lipase maturation factor 2b [Source:ZFIN;Acc:ZDB-GENE-070206-11]	lmf2b	-0.301086	0.0633067	1
ENSDARG00000044776	chloride intracellular channel 3 [Source:ZFIN;Acc:ZDB-GENE-010507-2]	clic3	1.74675	0.0633388	1
ENSDARG00000100149	axin 2 (conductin, axil) [Source:NCBI gene;Acc:58080]	axin2	-0.442172	0.0633695	1
ENSDARG00000097875		CR786577.1	-1.0517	0.0635464	1
ENSDARG00000033160	nuclear receptor subfamily 1, group d, member 1 [Source:ZFIN;Acc:ZDB-GENE-050105-1]	nr1d1	0.78264	0.0636149	1
ENSDARG00000054837	zgc:136870 [Source:ZFIN;Acc:ZDB-GENE-060312-1]	zgc:136870	1.52213	0.0636349	1
ENSDARG00000030972	DnaJ heat shock protein family (Hsp40) member A1 [Source:ZFIN;Acc:ZDB-GENE-030131-2642]	dnaja1	0.494219	0.0636559	1
ENSDARG00000040041	minichromosome maintenance complex component 4 [Source:ZFIN;Acc:ZDB-GENE-030131-9544]	mcm4	-0.304806	0.0636943	1
ENSDARG00000114743	si:dkey-11d20.1 [Source:ZFIN;Acc:ZDB-GENE-070705-291]	si:dkey-11d20.1	1.24532	0.0637404	1
ENSDARG00000004218	Rho family GTPase 1b [Source:ZFIN;Acc:ZDB-GENE-060315-7]	rnd1b	0.316698	0.0637551	1
ENSDARG00000030176	zgc:92429 [Source:ZFIN;Acc:ZDB-GENE-040801-194]	zgc:92429	-0.828959	0.0638188	1
ENSDARG00000097556	cytochrome P450, family 8, subfamily B, polypeptide 2 [Source:ZFIN;Acc:ZDB-GENE-080212-9]	cyp8b2	-2.63037	0.0638493	1
ENSDARG00000056036	syntaxin binding protein 1b [Source:ZFIN;Acc:ZDB-GENE-060531-166]	stxbp1b	0.264204	0.0639632	1
ENSDARG00000086650	tetratricopeptide repeat domain 41 [Source:ZFIN;Acc:ZDB-GENE-110914-190]	ttc41	-1.62521	0.063973	1
ENSDARG00000102243	si:ch211-180m24.3 [Source:ZFIN;Acc:ZDB-GENE-131119-31]	si:ch211-180m24.3	4.03882	0.064073	1
ENSDARG00000031683	v-fos FBJ murine osteosarcoma viral oncogene homolog Ab [Source:ZFIN;Acc:ZDB-GENE-031222-4]	fosab	0.80713	0.0641376	1
ENSDARG00000023272	transcription factor AP-2 delta (activating enhancer binding protein 2 delta) [Source:NCBI gene;Acc:566838]	tfap2d	-0.419346	0.0642217	1
ENSDARG00000075100	neogenin 1b [Source:ZFIN;Acc:ZDB-GENE-131121-320]	neo1b	-0.549649	0.0642506	1
ENSDARG00000094741	zgc:173425 [Source:ZFIN;Acc:ZDB-GENE-071004-51]	HTRA2	2.44887	0.0643094	1
ENSDARG00000097982		BX005375.1	-2.06842	0.0644889	1
ENSDARG00000098937	si:ch73-315f9.2 [Source:ZFIN;Acc:ZDB-GENE-131121-517]	si:ch73-315f9.2	-1.00221	0.0644983	1
ENSDARG00000103643	unc-45 myosin chaperone A [Source:ZFIN;Acc:ZDB-GENE-050417-158]	unc45a	-0.355756	0.0645263	1
ENSDARG00000035895	fibronectin type III domain containing 5b [Source:NCBI gene;Acc:555635]	fndc5b	-0.978476	0.064585	1
ENSDARG00000101872		BX842701.1	1.62988	0.0647632	1
ENSDARG00000104932	si:ch211-261d9.1 [Source:ZFIN;Acc:ZDB-GENE-141211-41]	si:ch211-261d9.1	4.04664	0.0650161	1
ENSDARG00000040257	solute carrier family 38 member 11 [Source:NCBI gene;Acc:550337]	slc38a11	-0.944991	0.0650301	1
ENSDARG00000076797	si:dkey-178o16.4 [Source:ZFIN;Acc:ZDB-GENE-131127-163]	si:dkey-178o16.4	1.25924	0.0650312	1
ENSDARG00000038153	lectin, galactoside-binding, soluble, 2b [Source:ZFIN;Acc:ZDB-GENE-040426-1590]	lgals2b	-0.993912	0.0650359	1
ENSDARG00000117588		CABZ01087564.1	0.571771	0.0650493	1
ENSDARG00000102141	protein tyrosine phosphatase non-receptor type 12 [Source:ZFIN;Acc:ZDB-GENE-040426-1441]	ptpn12	0.448738	0.0651944	1
ENSDARG00000077654	glutamate receptor, metabotropic 8a [Source:ZFIN;Acc:ZDB-GENE-110421-2]	grm8a	-0.632637	0.065207	1
ENSDARG00000098583	WW domain binding protein 1 [Source:ZFIN;Acc:ZDB-GENE-040426-1830]	wbp1	0.320925	0.0652731	1
ENSDARG00000041060	lectin, galactoside-binding, soluble, 9 (galectin 9)-like 3 [Source:ZFIN;Acc:ZDB-GENE-040718-159]	lgals9l3	0.747421	0.0653058	1
ENSDARG00000034493	glutamate receptor, ionotropic, N-methyl D-aspartate 2A, a [Source:ZFIN;Acc:ZDB-GENE-070424-129]	grin2aa	-0.364035	0.0653952	1
ENSDARG00000062956	diacylglycerol lipase, alpha [Source:ZFIN;Acc:ZDB-GENE-070619-1]	dagla	-0.414344	0.0654418	1
ENSDARG00000038288	CD151 molecule [Source:ZFIN;Acc:ZDB-GENE-041010-137]	cd151	-0.665389	0.0654745	1
ENSDARG00000079622	FERM domain containing 5 [Source:ZFIN;Acc:ZDB-GENE-060810-165]	frmd5	-0.677398	0.0655599	1
ENSDARG00000040683	si:ch73-40a17.3 [Source:ZFIN;Acc:ZDB-GENE-030131-5797]	MEP1B	0.902674	0.0656091	1
ENSDARG00000069888	claudin a [Source:ZFIN;Acc:ZDB-GENE-010328-1]	cldna	-1.17316	0.0659051	1
ENSDARG00000096816	si:dkeyp-106c3.2 [Source:ZFIN;Acc:ZDB-GENE-070705-527]	si:dkeyp-106c3.2	1.83411	0.0660413	1
ENSDARG00000068969	zgc:153759 [Source:ZFIN;Acc:ZDB-GENE-060825-148]	zgc:153759	1.80592	0.0660677	1
ENSDARG00000059466	WASP family member 3a [Source:ZFIN;Acc:ZDB-GENE-060531-55]	wasf3a	0.365574	0.0661158	1
ENSDARG00000096951		CR848812.1	-1.40698	0.0661422	1
ENSDARG00000041791	mgat4 family member C [Source:ZFIN;Acc:ZDB-GENE-091204-429]	mgat4c	-0.950665	0.0662223	1
ENSDARG00000071657	si:dkey-19a16.4 [Source:ZFIN;Acc:ZDB-GENE-050208-652]	si:dkey-19a16.4	-3.99031	0.0663244	1
ENSDARG00000103037		CR848788.1	1.41415	0.0663611	1
ENSDARG00000095446		CR383662.3	1.70106	0.0668779	1
ENSDARG00000059507	si:dkey-163m14.2 [Source:ZFIN;Acc:ZDB-GENE-120215-47]		0.910496	0.0670113	1
ENSDARG00000093026	si:ch211-222n4.2 [Source:ZFIN;Acc:ZDB-GENE-091118-110]	si:ch211-222n4.2	1.36744	0.0670395	1
ENSDARG00000093665	si:dkey-285e18.5 [Source:ZFIN;Acc:ZDB-GENE-120703-44]	si:dkey-285e18.5	2.90409	0.0670643	1
ENSDARG00000102417	proteasome 26S subunit, non-ATPase 7 [Source:ZFIN;Acc:ZDB-GENE-030131-5541]	psmd7	0.343752	0.0671199	1
ENSDARG00000010785	thrombospondin 1b [Source:ZFIN;Acc:ZDB-GENE-020708-1]	thbs1b	-0.454817	0.0671223	1
ENSDARG00000052157	interleukin 12 receptor, beta 2a [Source:ZFIN;Acc:ZDB-GENE-080107-3]	il12rb2	1.28669	0.0672979	1
ENSDARG00000018569	tumor necrosis factor receptor superfamily, member 1a [Source:ZFIN;Acc:ZDB-GENE-040426-2252]	tnfrsf1a	0.748595	0.0673232	1
ENSDARG00000112175	zgc:173552 [Source:ZFIN;Acc:ZDB-GENE-080220-24]	zgc:173552	1.1085	0.0673494	1
ENSDARG00000028163	proteoglycan 4b [Source:ZFIN;Acc:ZDB-GENE-041014-324]	prg4b	0.942422	0.0673584	1
ENSDARG00000103078	zgc:174222 [Source:ZFIN;Acc:ZDB-GENE-080220-40]	zgc:174222	0.810799	0.0675588	1
ENSDARG00000099045	calcium channel, voltage-dependent, beta 2a [Source:ZFIN;Acc:ZDB-GENE-080808-7]	cacnb2a	-0.541938	0.0676543	1
ENSDARG00000061835	zona pellucida-like domain containing 1a [Source:ZFIN;Acc:ZDB-GENE-110411-81]	zpld1a	-3.92456	0.0677019	1
ENSDARG00000105392	si:ch73-22o18.1 [Source:ZFIN;Acc:ZDB-GENE-160113-40]	si:ch73-22o18.1	0.650736	0.0677171	1
ENSDARG00000032238	dynamin 3a [Source:ZFIN;Acc:ZDB-GENE-040724-76]	dnm3a	-1.13322	0.0679274	1
ENSDARG00000086665	si:dkey-175g6.2 [Source:ZFIN;Acc:ZDB-GENE-030131-8061]	si:dkey-175g6.2	0.767374	0.0679817	1
ENSDARG00000063003	alkB homolog 5, RNA demethylase [Source:NCBI gene;Acc:570158]	alkbh5	0.510949	0.0680315	1
ENSDARG00000040439	ribosomal L24 domain containing 1 [Source:NCBI gene;Acc:406266]	rsl24d1	0.304673	0.0681726	1
ENSDARG00000011671	phosphodiesterase 6B, cGMP-specific, rod, beta [Source:ZFIN;Acc:ZDB-GENE-090421-2]	pde6b	0.479983	0.0682115	1
ENSDARG00000112168		CABZ01112387.1	-1.13083	0.0682464	1
ENSDARG00000027529	heme oxygenase 1a [Source:ZFIN;Acc:ZDB-GENE-030131-3102]	hmox1a	0.669534	0.068441	1
ENSDARG00000095963	asialoglycoprotein receptor-like 2 [Source:ZFIN;Acc:ZDB-GENE-080917-52]	asgrl2	2.19157	0.0684548	1
ENSDARG00000033999	cytochrome P450, family 26, subfamily A, polypeptide 1 [Source:NCBI gene;Acc:30381]	cyp26a1	0.463359	0.0684631	1
ENSDARG00000096375	membrane-associated ring finger (C3HC4) 7 [Source:ZFIN;Acc:ZDB-GENE-080204-121]	44262	0.461492	0.068502	1
ENSDARG00000040479	glycoprotein hormones, alpha polypeptide [Source:ZFIN;Acc:ZDB-GENE-040715-2]	cga	2.30746	0.0685161	1
ENSDARG00000054313	zona pellucida glycoprotein 3f, tandem duplicate 2 [Source:ZFIN;Acc:ZDB-GENE-030616-589]	zp3f.2	-1.48659	0.068645	1
ENSDARG00000056108	NADH:ubiquinone oxidoreductase subunit A4 [Source:NCBI gene;Acc:406298]	ndufa4	-0.393929	0.0686497	1
ENSDARG00000011770	dehydrogenase/reductase (SDR family) member 12 [Source:ZFIN;Acc:ZDB-GENE-060929-1134]	dhrs12	0.380056	0.068713	1
ENSDARG00000103636	zgc:174703 [Source:ZFIN;Acc:ZDB-GENE-080208-4]	zgc:174703	0.828442	0.0688485	1
ENSDARG00000062154	disco-interacting protein 2 homolog Ca [Source:ZFIN;Acc:ZDB-GENE-031118-39]	dip2ca	-0.370313	0.0688634	1
ENSDARG00000001913	palmdelphin a [Source:ZFIN;Acc:ZDB-GENE-070705-48]	palmda	0.321694	0.0690592	1
ENSDARG00000004836	DnaJ (Hsp40) homolog, subfamily C, member 5ab [Source:ZFIN;Acc:ZDB-GENE-081021-2]	dnajc5ab	0.258894	0.069127	1
ENSDARG00000079802	arylalkylamine N-acetyltransferase 2 [Source:ZFIN;Acc:ZDB-GENE-991019-6]	aanat2	0.314576	0.0691648	1
ENSDARG00000099953	si:dkey-202l22.3 [Source:ZFIN;Acc:ZDB-GENE-131127-471]	PRLHR	-4.2446	0.0692162	1
ENSDARG00000007531	zinc finger, CCHC domain containing 9 [Source:ZFIN;Acc:ZDB-GENE-031030-9]	zcchc9	0.453238	0.0693787	1
ENSDARG00000105005	transmembrane protein 132A [Source:ZFIN;Acc:ZDB-GENE-140106-237]	tmem132a	0.576127	0.0694182	1
ENSDARG00000117179	GTPase IMAP family member 7-like [Source:NCBI gene;Acc:100537396]	FP326649.1	1.7519	0.0694823	1
ENSDARG00000117723		LO017725.2	0.787062	0.0695295	1
ENSDARG00000095059	si:ch211-106h4.5 [Source:ZFIN;Acc:ZDB-GENE-070705-15]	si:ch211-106h4.5	1.56283	0.069545	1
ENSDARG00000079323	repulsive guidance molecule BMP co-receptor b [Source:ZFIN;Acc:ZDB-GENE-040527-2]	rgmb	-0.295626	0.0696113	1
ENSDARG00000010823	mediator of cell motility 1 [Source:NCBI gene;Acc:327360]	memo1	0.290598	0.0697071	1
ENSDARG00000091728	zgc:114046 [Source:ZFIN;Acc:ZDB-GENE-050320-24]	zgc:114046	1.26545	0.0697788	1
ENSDARG00000018061	nei-like DNA glycosylase 1 [Source:ZFIN;Acc:ZDB-GENE-040426-994]	neil1	0.411776	0.0698693	1
ENSDARG00000004672	protein tyrosine kinase 2ab [Source:ZFIN;Acc:ZDB-GENE-020114-1]	ptk2ab	-0.293277	0.0698843	1
ENSDARG00000012426	neurofilament, light polypeptide b [Source:ZFIN;Acc:ZDB-GENE-060312-44]	neflb	-1.3791	0.0700138	1
ENSDARG00000111799	zinc finger protein 1011 [Source:ZFIN;Acc:ZDB-GENE-131120-89]	znf1011	1.16035	0.0700883	1
ENSDARG00000060539	SH3 and multiple ankyrin repeat domains 1 [Source:ZFIN;Acc:ZDB-GENE-130530-691]	shank1	-0.76808	0.0701019	1
ENSDARG00000008407	tetraspanin 7b [Source:ZFIN;Acc:ZDB-GENE-040927-5]	tspan7b	-0.298919	0.0701999	1
ENSDARG00000098811		LO018021.1	0.64221	0.0702937	1
ENSDARG00000045695	MYC proto-oncogene, bHLH transcription factor a [Source:NCBI gene;Acc:30686]	myca	0.294031	0.0703378	1
ENSDARG00000019856	ATPase Na+/K+ transporting subunit alpha 1b [Source:ZFIN;Acc:ZDB-GENE-001212-5]	atp1a1b	-0.33512	0.0704256	1
ENSDARG00000052376	UDP-GlcNAc:betaGal beta-1,3-N-acetylglucosaminyltransferase 2a [Source:ZFIN;Acc:ZDB-GENE-090312-192]	b3gnt2a	-1.9611	0.0704256	1
ENSDARG00000116575		CR352265.3	-1.07169	0.0704772	1
ENSDARG00000100224		CABZ01074304.1	0.728632	0.070505	1
ENSDARG00000060246	solute carrier family 16 member 6b [Source:ZFIN;Acc:ZDB-GENE-110208-3]	slc16a6b	-0.397697	0.0705404	1
ENSDARG00000093950		BX530407.2	4.05662	0.0709569	1
ENSDARG00000101389	zgc:174180 [Source:ZFIN;Acc:ZDB-GENE-080206-1]	zgc:174180	2.26232	0.0709695	1
ENSDARG00000102401	zgc:173517 [Source:ZFIN;Acc:ZDB-GENE-071004-104]	zgc:173517	1.53621	0.0709772	1
ENSDARG00000023963	tropomyosin 4a [Source:ZFIN;Acc:ZDB-GENE-040426-2185]	tpm4a	-0.520949	0.0710517	1
ENSDARG00000093286	ankyrin repeat domain 34C [Source:NCBI gene;Acc:566743]	CABZ01039782.1	-2.49526	0.0710916	1
ENSDARG00000092139	si:dkey-247i3.6 [Source:ZFIN;Acc:ZDB-GENE-110913-83]	si:dkey-247i3.6	1.5343	0.0711333	1
ENSDARG00000098724	retinal G protein coupled receptor b [Source:ZFIN;Acc:ZDB-GENE-050522-447]	rgrb	0.473238	0.071286	1
ENSDARG00000098071	zinc finger protein 1049 [Source:ZFIN;Acc:ZDB-GENE-131118-26]	znf1049	4.03663	0.0716585	1
ENSDARG00000077467	SRY-box transcription factor 10 [Source:ZFIN;Acc:ZDB-GENE-011207-1]	sox10	-0.430916	0.0716702	1
ENSDARG00000011400	troponin C type 1a (slow) [Source:ZFIN;Acc:ZDB-GENE-030523-1]	tnnc1a	-3.26091	0.0716973	1
ENSDARG00000002241	potassium voltage-gated channel, shaker-related subfamily, member 2a [Source:ZFIN;Acc:ZDB-GENE-131113-1]	kcna2a	-1.07133	0.0718143	1
ENSDARG00000092277		BX663611.2	1.48902	0.0718584	1
ENSDARG00000099989	cysteine-rich with EGF-like domains 1a [Source:ZFIN;Acc:ZDB-GENE-120111-4]	creld1a	0.534759	0.071895	1
ENSDARG00000058771	neuron navigator 1b [Source:ZFIN;Acc:ZDB-GENE-120215-84]	nav1b	-0.600679	0.07193	1
ENSDARG00000056122	GDP dissociation inhibitor 1 [Source:ZFIN;Acc:ZDB-GENE-050522-504]	gdi1	-0.279145	0.072015	1
ENSDARG00000117621		FP016248.1	1.2529	0.0720609	1
ENSDARG00000092339	Pim proto-oncogene, serine/threonine kinase, related 61 [Source:ZFIN;Acc:ZDB-GENE-131125-26]	pimr61	4.04814	0.0721584	1
ENSDARG00000089913	calcium channel, voltage-dependent, T type, alpha 1G subunit [Source:ZFIN;Acc:ZDB-GENE-090514-2]	cacna1g	-0.651404	0.072162	1
ENSDARG00000061103	solute carrier family 19 member 3b [Source:ZFIN;Acc:ZDB-GENE-050419-166]	slc19a3b	2.22977	0.0721764	1
ENSDARG00000017811	si:ch211-210c8.6 [Source:ZFIN;Acc:ZDB-GENE-030131-3630]	si:ch211-210c8.6	0.635911	0.0722001	1
ENSDARG00000103424	si:dkey-13m3.2 [Source:ZFIN;Acc:ZDB-GENE-121214-42]	si:dkey-13m3.2	0.951865	0.0722775	1
ENSDARG00000067824	contactin associated protein like 3 [Source:ZFIN;Acc:ZDB-GENE-091113-51]	cntnap3	-0.745306	0.072584	1
ENSDARG00000041873	si:dkey-221h15.4 [Source:ZFIN;Acc:ZDB-GENE-041014-340]	si:dkey-221h15.4	1.8265	0.0728352	1
ENSDARG00000067596	FA complementation group B [Source:ZFIN;Acc:ZDB-GENE-060510-1]	fancb	0.811261	0.0735453	1
ENSDARG00000102584	copine VII [Source:ZFIN;Acc:ZDB-GENE-131125-70]	cpne7	-1.11597	0.0735608	1
ENSDARG00000011886	phosducin a [Source:ZFIN;Acc:ZDB-GENE-031023-1]	pdca	0.462037	0.0736822	1
ENSDARG00000117363		CABZ01071845.2	1.87659	0.073699	1
ENSDARG00000022772	si:ch211-106a19.1 [Source:ZFIN;Acc:ZDB-GENE-060526-3]	OSBP2	0.439176	0.0737168	1
ENSDARG00000104080	protocadherin 2 alpha b 12 [Source:ZFIN;Acc:ZDB-GENE-041118-11]	pcdh2ab12	0.634823	0.0739496	1
ENSDARG00000104985	zgc:110249 [Source:ZFIN;Acc:ZDB-GENE-050522-331]	zgc:110249	0.604516	0.0740439	1
ENSDARG00000099353	solute carrier family 25 member 13 [Source:ZFIN;Acc:ZDB-GENE-080319-2]	slc25a13	0.926389	0.0740973	1
ENSDARG00000060926	ring finger protein 19B [Source:NCBI gene;Acc:562396]	rnf19b	-0.521996	0.0742282	1
ENSDARG00000088234	si:ch211-217k17.12 [Source:ZFIN;Acc:ZDB-GENE-061207-20]	si:ch211-217k17.12	1.54442	0.0743353	1
ENSDARG00000109392		FO681393.1	4.03633	0.0744251	1
ENSDARG00000114460		CU694999.1	4.0364	0.074435	1
ENSDARG00000117077		BX321886.1	1.02961	0.0745167	1
ENSDARG00000077396	TLC domain containing 2 [Source:NCBI gene;Acc:559420]	tlcd2	0.537099	0.0745205	1
ENSDARG00000042014	cytochrome P450, family 11, subfamily C, polypeptide 1 [Source:ZFIN;Acc:ZDB-GENE-070828-1]	cyp11c1	0.453323	0.074642	1
ENSDARG00000096455		BX005275.2	1.52555	0.0746687	1
ENSDARG00000069430	tumor protein p53 inducible protein 11a [Source:ZFIN;Acc:ZDB-GENE-050306-58]	tp53i11a	-0.55871	0.0748037	1
ENSDARG00000102123	putative homeodomain transcription factor 2 [Source:ZFIN;Acc:ZDB-GENE-040711-4]	phtf2	0.505478	0.0748116	1
ENSDARG00000087651	cathepsin Lb [Source:ZFIN;Acc:ZDB-GENE-980526-285]	ctslb	2.56129	0.0748295	1
ENSDARG00000097574		CR847898.3	2.61227	0.0748833	1
ENSDARG00000062471	TAFA chemokine like family member 4b [Source:ZFIN;Acc:ZDB-GENE-061013-164]	tafa4b	-0.961315	0.0749692	1
ENSDARG00000100979	pregnancy zone protein-like [Source:NCBI gene;Acc:103909927]	CABZ01075618.1	-2.0462	0.0751004	1
ENSDARG00000009637	recoverin 3 [Source:ZFIN;Acc:ZDB-GENE-040426-1661]	rcvrn3	0.409486	0.0753728	1
ENSDARG00000099073	si:zfos-741a10.4 [Source:ZFIN;Acc:ZDB-GENE-141222-65]	si:zfos-741a10.4	1.2819	0.0753928	1
ENSDARG00000060532	ADAM metallopeptidase domain 22 [Source:ZFIN;Acc:ZDB-GENE-070810-1]	adam22	-0.453105	0.0754072	1
ENSDARG00000116216	zinc finger protein 1046 [Source:ZFIN;Acc:ZDB-GENE-030131-2092]	znf1046	1.5266	0.0756467	1
ENSDARG00000092137	si:dkey-4i23.5 [Source:ZFIN;Acc:ZDB-GENE-070912-543]	si:dkey-4i23.5	-1.63413	0.0756806	1
ENSDARG00000030326	ephrin-A1a [Source:ZFIN;Acc:ZDB-GENE-040426-1135]	efna1a	0.281866	0.075785	1
ENSDARG00000054575	Wnt-activated inhibitory factor 2 [Source:ZFIN;Acc:ZDB-GENE-120209-3]	waif2	-0.957947	0.075799	1
ENSDARG00000111796		CABZ01050238.1	1.10108	0.0758025	1
ENSDARG00000016977	sorting nexin 27b [Source:ZFIN;Acc:ZDB-GENE-040426-1529]	snx27b	0.421753	0.0759871	1
ENSDARG00000115603	calcium channel, voltage-dependent, L type, alpha 1D subunit, b [Source:ZFIN;Acc:ZDB-GENE-040525-3]	cacna1db	0.643784	0.0762617	1
ENSDARG00000110997	vimentin type intermediate filament associated coiled-coil protein [Source:NCBI gene;Acc:570934]	VMAC	2.92244	0.0763009	1
ENSDARG00000007184	zinc finger and BTB domain containing 16a [Source:NCBI gene;Acc:323269]	zbtb16a	-0.44885	0.0763602	1
ENSDARG00000068323	astrotactin 1 [Source:ZFIN;Acc:ZDB-GENE-050320-140]	astn1	-0.369995	0.0763915	1
ENSDARG00000105507	zgc:112234 [Source:NCBI gene;Acc:554097]	zgc:112234	1.37722	0.0764689	1
ENSDARG00000069139	glutamate receptor, ionotropic, kainate 1a [Source:ZFIN;Acc:ZDB-GENE-030131-6502]	grik1a	0.40553	0.0766906	1
ENSDARG00000076052	seizure related 6 homolog (mouse)-like 2 [Source:ZFIN;Acc:ZDB-GENE-091204-189]	sez6l2	-0.591454	0.0766928	1
ENSDARG00000013892	sortilin-related receptor, L(DLR class) A repeats containing [Source:ZFIN;Acc:ZDB-GENE-050208-22]	sorl1	-0.278431	0.07672	1
ENSDARG00000089138	si:ch1073-440b2.1 [Source:ZFIN;Acc:ZDB-GENE-030131-8303]	si:ch1073-440b2.1	0.333622	0.0768301	1
ENSDARG00000060601	regulator of G protein signaling 7 binding protein a [Source:NCBI gene;Acc:767669]	rgs7bpa	-0.659787	0.0770144	1
ENSDARG00000102445	si:dkey-22o22.2 [Source:ZFIN;Acc:ZDB-GENE-100922-84]	si:dkey-22o22.2	-0.365136	0.077173	1
ENSDARG00000024771	solute carrier family 24 member 5 [Source:ZFIN;Acc:ZDB-GENE-031210-1]	slc24a5	-0.353095	0.0772332	1
ENSDARG00000105353	histone 1, H4, like [Source:ZFIN;Acc:ZDB-GENE-070927-10]	hist1h4l	2.04929	0.0772515	1
ENSDARG00000103642	peptidoglycan recognition protein 6 [Source:ZFIN;Acc:ZDB-GENE-071227-2]	pglyrp6	1.27207	0.0772836	1
ENSDARG00000101481	retinol binding protein 1a, cellular [Source:ZFIN;Acc:ZDB-GENE-020320-1]	rbp5	0.272622	0.0773409	1
ENSDARG00000008212	potassium channel, subfamily K, member 13a [Source:ZFIN;Acc:ZDB-GENE-080219-46]	kcnk13a	-1.49675	0.0773521	1
ENSDARG00000078222	apoptosis-associated tyrosine kinase a [Source:ZFIN;Acc:ZDB-GENE-100812-4]	aatka	-0.681894	0.0775687	1
ENSDARG00000060457	peripheral myelin protein 22b [Source:ZFIN;Acc:ZDB-GENE-060421-4337]	pmp22b	-0.588574	0.077632	1
ENSDARG00000016311	dedicator of cytokinesis 9b [Source:ZFIN;Acc:ZDB-GENE-090916-2]	dock9b	0.321987	0.0777072	1
ENSDARG00000070289	si:ch211-113a14.22 [Source:ZFIN;Acc:ZDB-GENE-121214-203]	si:ch211-113a14.22	1.41039	0.0777163	1
ENSDARG00000088181	metallophosphoesterase domain containing 1 [Source:ZFIN;Acc:ZDB-GENE-111104-1]	mpped1	-1.30866	0.0778572	1
ENSDARG00000078875	adrenomedullin 2b [Source:ZFIN;Acc:ZDB-GENE-081104-279]	adm2b	1.04356	0.0779576	1
ENSDARG00000017261	glycerophosphodiester phosphodiesterase domain containing 1 [Source:ZFIN;Acc:ZDB-GENE-040822-22]	gdpd1	-0.327753	0.0779858	1
ENSDARG00000018809	abhydrolase domain containing 3 [Source:ZFIN;Acc:ZDB-GENE-040912-90]	abhd3	0.527198	0.0779879	1
ENSDARG00000097673		FP016235.1	1.53716	0.0780839	1
ENSDARG00000074225	si:ch211-269e2.1 [Source:ZFIN;Acc:ZDB-GENE-070912-267]	si:ch211-269e2.1	-0.423652	0.0781609	1
ENSDARG00000078890	WD repeat and FYVE domain containing 3 [Source:ZFIN;Acc:ZDB-GENE-070705-153]	wdfy3	-0.306998	0.0782318	1
ENSDARG00000105746	si:cabz01083838.1 [Source:NCBI gene;Acc:101883056]	LO018124.1	1.36678	0.0784501	1
ENSDARG00000102153	neuropilin 1a [Source:NCBI gene;Acc:353246]	nrp1a	-0.280073	0.078549	1
ENSDARG00000078155	innate immunity activator a [Source:ZFIN;Acc:ZDB-GENE-081105-161]	inavaa	-0.383267	0.0786151	1
ENSDARG00000078606	zgc:194224 [Source:ZFIN;Acc:ZDB-GENE-081022-79]	zgc:194224	0.615221	0.0787075	1
ENSDARG00000035169	layilin a [Source:ZFIN;Acc:ZDB-GENE-070705-452]	layna	1.9787	0.0787531	1
ENSDARG00000063264	protocadherin 9 [Source:ZFIN;Acc:ZDB-GENE-091015-1]	pcdh9	-0.459848	0.0787714	1
ENSDARG00000097018		CR628341.1	3.29907	0.0788333	1
ENSDARG00000096872		CU467963.1	1.75232	0.0788347	1
ENSDARG00000112049	claudin 15a [Source:ZFIN;Acc:ZDB-GENE-040426-1305]	cldn15a	1.13797	0.0789682	1
ENSDARG00000045957	G protein-coupled receptor 65 [Source:ZFIN;Acc:ZDB-GENE-120709-81]	gpr65	2.20171	0.0790343	1
ENSDARG00000115013		LO017845.1	0.676291	0.0791821	1
ENSDARG00000096772		BX510319.1	1.58294	0.0794685	1
ENSDARG00000076564	heparan sulfate proteoglycan 2 [Source:ZFIN;Acc:ZDB-GENE-080807-4]	hspg2	-0.48502	0.079509	1
ENSDARG00000079315	leupaxin [Source:ZFIN;Acc:ZDB-GENE-081105-159]	lpxn	1.20938	0.0795294	1
ENSDARG00000017653	regulator of G protein signaling 13 [Source:ZFIN;Acc:ZDB-GENE-070410-138]	rgs13	1.1035	0.0796621	1
ENSDARG00000016584	regulator of G protein signaling 7a [Source:ZFIN;Acc:ZDB-GENE-040718-276]	rgs7a	-0.434357	0.0797431	1
ENSDARG00000112493		BX088712.5	1.00472	0.0798317	1
ENSDARG00000091072	calcium and integrin binding family member 3 [Source:ZFIN;Acc:ZDB-GENE-121121-1]	cib3	1.46379	0.0798335	1
ENSDARG00000094086		CR548634.1	1.7068	0.0799031	1
ENSDARG00000094890	si:ch211-163b2.4 [Source:ZFIN;Acc:ZDB-GENE-081104-502]	si:ch211-163b2.4	1.31839	0.0799295	1
ENSDARG00000032056	ADP-ribosylation factor-like 6 [Source:NCBI gene;Acc:494134]	arl6	0.311069	0.0799773	1
ENSDARG00000010941	protein O-linked mannose N-acetylglucosaminyltransferase 2 (beta 1,4-) [Source:NCBI gene;Acc:497644]	pomgnt2	-0.485788	0.0800536	1
ENSDARG00000075113	nanog homeobox [Source:ZFIN;Acc:ZDB-GENE-030131-5486]	nanog	-1.40641	0.0800804	1
ENSDARG00000098214		CABZ01072487.1	0.972644	0.0802228	1
ENSDARG00000096578	cullin 4A [Source:ZFIN;Acc:ZDB-GENE-040426-1357]	cul4a	0.327522	0.0802897	1
ENSDARG00000104120		LO018260.1	1.21486	0.0804546	1
ENSDARG00000117317		CABZ01044022.1	1.64943	0.0806344	1
ENSDARG00000114142	si:dkeyp-4f2.1 [Source:ZFIN;Acc:ZDB-GENE-081103-33]	si:dkeyp-4f2.1	1.43686	0.0808117	1
ENSDARG00000100729	talin 1 [Source:ZFIN;Acc:ZDB-GENE-031002-48]	tln1	-0.367713	0.0808415	1
ENSDARG00000017634	phosducin b [Source:ZFIN;Acc:ZDB-GENE-031023-2]	pdcb	0.35743	0.0808598	1
ENSDARG00000001817	zmp:0000000521 [Source:ZFIN;Acc:ZDB-GENE-130530-524]	zmp:0000000521	0.873397	0.0809531	1
ENSDARG00000070951	high mobility group AT-hook 1b [Source:ZFIN;Acc:ZDB-GENE-061013-204]	hmga1b	0.246308	0.0809948	1
ENSDARG00000058008	SIX homeobox 3a [Source:ZFIN;Acc:ZDB-GENE-990415-127]	six3a	-0.265982	0.0810263	1
ENSDARG00000062849	potassium channel, subfamily K, member 10a [Source:ZFIN;Acc:ZDB-GENE-041210-291]	kcnk10a	1.05434	0.0810333	1
ENSDARG00000101369		CABZ01090890.1	0.288158	0.0810578	1
ENSDARG00000114022	WD repeat domain 1 [Source:HGNC Symbol;Acc:HGNC:12754]	WDR1	0.256155	0.0811299	1
ENSDARG00000052176	shiftless antiviral inhibitor of ribosomal frameshifting [Source:NCBI gene;Acc:797287]	shfl	-1.99867	0.0811424	1
ENSDARG00000039970	cannabinoid receptor 2 [Source:ZFIN;Acc:ZDB-GENE-040702-7]	cnr2	-1.1043	0.0812121	1
ENSDARG00000074285	si:ch73-335m24.2 [Source:ZFIN;Acc:ZDB-GENE-100922-203]	si:ch73-335m24.2	-3.5291	0.0814335	1
ENSDARG00000015567	zic family member 1 (odd-paired homolog, Drosophila) [Source:ZFIN;Acc:ZDB-GENE-000208-4]	zic1	-0.506398	0.0814747	1
ENSDARG00000009020	cannabinoid receptor 1 [Source:ZFIN;Acc:ZDB-GENE-040312-3]	cnr1	-0.917031	0.0816237	1
ENSDARG00000037746	actin, beta 1 [Source:NCBI gene;Acc:57934]	actb1	-0.254575	0.0817028	1
ENSDARG00000043902	gamma-aminobutyric acid (GABA) A receptor, rho 1 [Source:ZFIN;Acc:ZDB-GENE-040724-212]	gabrr1	0.607539	0.0817635	1
ENSDARG00000011065	calcium/calmodulin-dependent protein kinase (CaM kinase) II beta 1 [Source:ZFIN;Acc:ZDB-GENE-030131-9588]	camk2b1	-0.299381	0.0818611	1
ENSDARG00000074865	FERM and PDZ domain containing 3 [Source:ZFIN;Acc:ZDB-GENE-100316-9]	frmpd3	-0.659292	0.0818903	1
ENSDARG00000104600		CABZ01070527.1	1.48646	0.0819692	1
ENSDARG00000097099	si:ch211-108d22.1 [Source:ZFIN;Acc:ZDB-GENE-131126-61]	si:ch211-108d22.1	2.22107	0.0819859	1
ENSDARG00000087765	crystallin, gamma M2d10 [Source:ZFIN;Acc:ZDB-GENE-071004-96]	crygm2d10	-0.339983	0.0820927	1
ENSDARG00000063150	neurexin 2b [Source:ZFIN;Acc:ZDB-GENE-070206-7]	nrxn2b	-0.404427	0.0822486	1
ENSDARG00000093042	si:dkey-104n9.1 [Source:ZFIN;Acc:ZDB-GENE-081104-300]	si:dkey-104n9.1	0.840892	0.0822953	1
ENSDARG00000054186	neuronal calcium sensor 1b [Source:ZFIN;Acc:ZDB-GENE-050930-1]	ncs1b	-0.961321	0.0823762	1
ENSDARG00000101446	si:dkey-46i9.1 [Source:ZFIN;Acc:ZDB-GENE-141216-493]	si:dkey-46i9.1	-0.26806	0.0824263	1
ENSDARG00000005372	calcium/calmodulin-dependent protein kinase IV [Source:ZFIN;Acc:ZDB-GENE-050417-76]	camk4	-0.725231	0.0824606	1
ENSDARG00000035798	guanine nucleotide binding protein (G protein), gamma transducing activity polypeptide 1 [Source:ZFIN;Acc:ZDB-GENE-030131-7596]	gngt1	0.461625	0.0825763	1
ENSDARG00000092246	si:dkey-20i20.3 [Source:ZFIN;Acc:ZDB-GENE-060503-623]	si:dkey-20i20.3	0.77233	0.0825956	1
ENSDARG00000117514		LO018315.7	3.86689	0.0826041	1
ENSDARG00000114675		BX324233.1	3.86689	0.0826044	1
ENSDARG00000089477	si:ch211-132g1.3 [Source:ZFIN;Acc:ZDB-GENE-090312-148]	si:ch211-132g1.3	0.579612	0.0827073	1
ENSDARG00000101458	R3H domain containing 1 [Source:ZFIN;Acc:ZDB-GENE-030131-7119]	r3hdm1	-0.309267	0.0827367	1
ENSDARG00000057683	minichromosome maintenance complex component 6 [Source:ZFIN;Acc:ZDB-GENE-030909-6]	mcm6	-0.259668	0.0828005	1
ENSDARG00000076027	kinesin family member 5C [Source:ZFIN;Acc:ZDB-GENE-081105-14]	kif5c	-0.605461	0.082833	1
ENSDARG00000106991		CR388373.3	-1.06218	0.08284	1
ENSDARG00000086631	ribonuclease/angiogenin inhibitor 1 [Source:ZFIN;Acc:ZDB-GENE-030131-4718]	rnh1	-1.02473	0.0828424	1
ENSDARG00000057743	si:dkey-10f21.4 [Source:ZFIN;Acc:ZDB-GENE-070912-350]	si:dkey-10f21.4	-0.97312	0.0828737	1
ENSDARG00000036944	endosulfine alpha a [Source:NCBI gene;Acc:569530]	ensaa	0.583185	0.082918	1
ENSDARG00000002204	heat shock protein, alpha-crystallin-related, b11 [Source:NCBI gene;Acc:796767]	hspb11	-1.20697	0.0829673	1
ENSDARG00000101133		BX510960.1	-1.69935	0.0830956	1
ENSDARG00000102927	si:dkey-156k2.4 [Source:ZFIN;Acc:ZDB-GENE-110913-8]	si:dkey-156k2.4	-1.10857	0.0831313	1
ENSDARG00000101071	si:dkeyp-80d11.14 [Source:ZFIN;Acc:ZDB-GENE-110914-120]	si:dkeyp-80d11.14	1.33629	0.0831493	1
ENSDARG00000044613	complement component 1, q subcomponent, A chain [Source:ZFIN;Acc:ZDB-GENE-050522-86]	c1qa	-3.75964	0.0831742	1
ENSDARG00000087968	odorant receptor, family E, subfamily 122, member 2 [Source:ZFIN;Acc:ZDB-GENE-990415-192]	or122-2	-3.75964	0.0831912	1
ENSDARG00000024894	T-box transcription factor 5a [Source:NCBI gene;Acc:30071]	tbx5a	-0.605544	0.0833533	1
ENSDARG00000097984		BX323067.1	0.978698	0.0834607	1
ENSDARG00000099159	si:ch211-186j3.3 [Source:ZFIN;Acc:ZDB-GENE-141216-442]	si:ch211-186j3.3	-3.54538	0.0834699	1
ENSDARG00000112564	extracellular calcium-sensing receptor-like [Source:NCBI gene;Acc:100537475]	CABZ01032906.1	-2.80159	0.0835323	1
ENSDARG00000030758	guanylate cyclase activator 1C [Source:ZFIN;Acc:ZDB-GENE-030829-1]	guca1c	1.17964	0.0835715	1
ENSDARG00000055698	pecanex 2 [Source:ZFIN;Acc:ZDB-GENE-090312-150]	pcnx2	-0.376463	0.0836522	1
ENSDARG00000106667	zinc finger protein 977 [Source:ZFIN;Acc:ZDB-GENE-110913-138]	znf977	1.91524	0.0839997	1
ENSDARG00000019920	lefty1 [Source:ZFIN;Acc:ZDB-GENE-990630-10]	lft1	1.58205	0.0840297	1
ENSDARG00000071143	si:dkey-208m12.2 [Source:ZFIN;Acc:ZDB-GENE-060503-716]	si:dkey-208m12.2	-1.13701	0.0840476	1
ENSDARG00000016448	vitellogenin 3, phosvitinless [Source:ZFIN;Acc:ZDB-GENE-991019-2]	vtg3	1.90119	0.0841478	1
ENSDARG00000101098	lysosomal associated membrane protein family member 5 [Source:HGNC Symbol;Acc:HGNC:16097]	LAMP5	0.532874	0.084295	1
ENSDARG00000054203	neuropeptide FF receptor 1 like 1 [Source:ZFIN;Acc:ZDB-GENE-091118-18]	npffr1l1	2.08114	0.0843494	1
ENSDARG00000037997	tubulin, beta 5 [Source:ZFIN;Acc:ZDB-GENE-031110-4]	tubb5	-0.278485	0.0843654	1
ENSDARG00000090041	si:dkey-163m14.6 [Source:ZFIN;Acc:ZDB-GENE-120215-50]		2.93007	0.0843848	1
ENSDARG00000087059	selenoprotein U1b [Source:ZFIN;Acc:ZDB-GENE-060929-88]	selenou1b	0.365036	0.0844746	1
ENSDARG00000013227	glutamate-ammonia ligase (glutamine synthase) c [Source:ZFIN;Acc:ZDB-GENE-060929-540]	glulc	-1.53471	0.0846201	1
ENSDARG00000101867	si:ch1073-416d2.4 [Source:ZFIN;Acc:ZDB-GENE-131121-564]	si:ch1073-416d2.4	0.444602	0.0846766	1
ENSDARG00000026611	suppressor of cytokine signaling 3b [Source:ZFIN;Acc:ZDB-GENE-040426-2528]	socs3b	0.468501	0.0847159	1
ENSDARG00000103786	kelch-like family member 13 [Source:ZFIN;Acc:ZDB-GENE-030131-2671]	klhl13	0.571678	0.0847557	1
ENSDARG00000077304	ETS transcription factor ERG [Source:ZFIN;Acc:ZDB-GENE-041212-40]	erg	0.831266	0.0847583	1
ENSDARG00000102798	minichromosome maintenance complex component 2 [Source:ZFIN;Acc:ZDB-GENE-020419-24]	mcm2	-0.260965	0.0848746	1
ENSDARG00000117379		CABZ01088275.1	1.21647	0.0848961	1
ENSDARG00000042727	exonuclease 5 [Source:NCBI gene;Acc:641427]	exo5	0.714736	0.0849366	1
ENSDARG00000062479	vascular cell adhesion molecule 1b [Source:ZFIN;Acc:ZDB-GENE-070209-238]	vcam1b	-0.589948	0.084959	1
ENSDARG00000099108	chloride intracellular channel 6 [Source:ZFIN;Acc:ZDB-GENE-121214-172]	clic6	0.391401	0.0850113	1
ENSDARG00000109968		BX537120.1	2.21318	0.0850187	1
ENSDARG00000057098	5-hydroxytryptamine (serotonin) receptor 1A b [Source:ZFIN;Acc:ZDB-GENE-090409-2]	htr1ab	-0.941805	0.0850302	1
ENSDARG00000109597	si:dkey-194g4.1 [Source:ZFIN;Acc:ZDB-GENE-141215-40]	si:dkey-194g4.1	0.652486	0.0850791	1
ENSDARG00000086130	si:ch211-42i6.2 [Source:ZFIN;Acc:ZDB-GENE-110913-9]	si:ch211-42i6.2	1.4679	0.0851135	1
ENSDARG00000097219		CT027582.1	1.64605	0.0852715	1
ENSDARG00000053568	proline-serine-threonine phosphatase interacting protein 1b [Source:ZFIN;Acc:ZDB-GENE-051127-25]	pstpip1b	-1.35292	0.0853159	1
ENSDARG00000070266	SPARC (osteonectin), cwcv and kazal like domains proteoglycan 3 [Source:ZFIN;Acc:ZDB-GENE-090311-24]	spock3	-0.283235	0.0854091	1
ENSDARG00000114797	RAB3B, member RAS oncogene family [Source:ZFIN;Acc:ZDB-GENE-050208-660]	rab3b	-0.501873	0.0854932	1
ENSDARG00000104339	transcription activator BRG1-like [Source:NCBI gene;Acc:100535713]	SMARCA4	-0.638885	0.0855013	1
ENSDARG00000099609	trophoblast glycoprotein a [Source:ZFIN;Acc:ZDB-GENE-030827-4]	tpbga	-1.0431	0.08564	1
ENSDARG00000037079	cilia and flagella associated protein 36 [Source:NCBI gene;Acc:678564]	cfap36	0.331257	0.0857341	1
ENSDARG00000099690	vasodilator stimulated phosphoprotein a [Source:ZFIN;Acc:ZDB-GENE-070424-68]	vaspa	1.58972	0.0857445	1
ENSDARG00000069961	interleukin 21 receptor, tandem duplicate 1 [Source:ZFIN;Acc:ZDB-GENE-080108-6]	il21r.1	0.847266	0.0857916	1
ENSDARG00000036073	CCAAT enhancer binding protein gamma [Source:ZFIN;Acc:ZDB-GENE-020111-5]	cebpg	0.310858	0.0858757	1
ENSDARG00000110572		CABZ01090785.1	0.577647	0.0859041	1
ENSDARG00000015156	fibulin 2 [Source:ZFIN;Acc:ZDB-GENE-060711-1]	fbln2	-0.469778	0.0860167	1
ENSDARG00000060393	fibrinogen C domain containing 1 [Source:ZFIN;Acc:ZDB-GENE-070424-245]	fibcd1	-0.878523	0.0860686	1
ENSDARG00000078210	TUB like protein 1b [Source:ZFIN;Acc:ZDB-GENE-110411-113]	tulp1b	0.380768	0.0861733	1
ENSDARG00000105053	developing brain homeobox 2 [Source:NCBI gene;Acc:30417]	CABZ01093502.2	1.86592	0.086185	1
ENSDARG00000045230	cytochrome c oxidase subunit 6B1 [Source:ZFIN;Acc:ZDB-GENE-040718-448]	cox6b1	-0.481388	0.0862324	1
ENSDARG00000114715		CU570893.1	1.12672	0.0862516	1
ENSDARG00000111789		BX571665.1	3.85565	0.0862651	1
ENSDARG00000102318	interleukin 6 (interferon, beta 2) [Source:ZFIN;Acc:ZDB-GENE-120509-1]	il6	3.85564	0.086273	1
ENSDARG00000095908	spermidine/spermine N1-acetyltransferase 1a, duplicate 2 [Source:NCBI gene;Acc:431716]	sat1a.2	0.265038	0.086491	1
ENSDARG00000078898	protocadherin 7a [Source:ZFIN;Acc:ZDB-GENE-120206-1]	pcdh7a	-0.315221	0.0865762	1
ENSDARG00000086892	Ets2 repressor factor like 1 [Source:ZFIN;Acc:ZDB-GENE-090529-3]	erfl1	-1.20853	0.0867589	1
ENSDARG00000043342	glutathione peroxidase 3 [Source:ZFIN;Acc:ZDB-GENE-070222-3]	gpx3	0.791541	0.0867825	1
ENSDARG00000002986	guanine deaminase [Source:ZFIN;Acc:ZDB-GENE-050522-434]	gda	0.981581	0.0868124	1
ENSDARG00000094505	si:ch211-218m3.9 [Source:ZFIN;Acc:ZDB-GENE-091116-94]	si:ch211-218m3.9	-2.32455	0.086827	1
ENSDARG00000059523	regulating synaptic membrane exocytosis 4 [Source:ZFIN;Acc:ZDB-GENE-110103-1]	rims4	-0.957794	0.0870521	1
ENSDARG00000043436	si:dkey-5n18.1 [Source:ZFIN;Acc:ZDB-GENE-041014-144]	si:dkey-5n18.1	0.728437	0.087075	1
ENSDARG00000070045	CUGBP, Elav-like family member 4 [Source:NCBI gene;Acc:436835]	celf4	-0.39771	0.0871017	1
ENSDARG00000059857	biliverdin reductase A [Source:ZFIN;Acc:ZDB-GENE-060929-312]	blvra	0.552782	0.087349	1
ENSDARG00000076486	acid phosphatase 1 [Source:ZFIN;Acc:ZDB-GENE-050327-12]	acp1	0.29441	0.0876148	1
ENSDARG00000087941	phosphodiesterase 8A [Source:ZFIN;Acc:ZDB-GENE-070112-622]	pde8a	0.323534	0.087625	1
ENSDARG00000095455	si:dkey-20i20.10 [Source:ZFIN;Acc:ZDB-GENE-060503-905]	si:dkey-20i20.10	0.809297	0.0876751	1
ENSDARG00000114696		BX537118.1	-3.54233	0.0876754	1
ENSDARG00000028164	cystatin 14a, tandem duplicate 1 [Source:ZFIN;Acc:ZDB-GENE-141031-1]	cst14a.1	0.803705	0.0877197	1
ENSDARG00000088160		CABZ01056629.1	0.699515	0.0877217	1
ENSDARG00000015002	cadherin 4, type 1, R-cadherin (retinal) [Source:ZFIN;Acc:ZDB-GENE-991207-1]	cdh4	-0.423153	0.0878543	1
ENSDARG00000035899	leucine rich repeat and Ig domain containing 1b [Source:NCBI gene;Acc:447837]	lingo1b	-0.551935	0.0879634	1
ENSDARG00000014746	RNA binding fox-1 homolog 1 [Source:NCBI gene;Acc:449554]	rbfox1	-0.261808	0.0879751	1
ENSDARG00000117105		CR749775.3	-0.821636	0.0879846	1
ENSDARG00000042982	cytochrome P450, family 2, subfamily P, polypeptide 8 [Source:ZFIN;Acc:ZDB-GENE-061030-1]	cyp2p8	-1.16114	0.088092	1
ENSDARG00000095184	si:ch73-52p7.1 [Source:ZFIN;Acc:ZDB-GENE-081107-46]	si:ch73-52p7.1	2.18453	0.0883551	1
ENSDARG00000104246	exosome component 3 [Source:ZFIN;Acc:ZDB-GENE-050706-140]	exosc3	0.962858	0.0884428	1
ENSDARG00000069998	si:ch211-145b13.6 [Source:ZFIN;Acc:ZDB-GENE-090313-36]	si:ch211-145b13.6	-0.765655	0.0884447	1
ENSDARG00000097047		BX629346.1	0.696895	0.0885525	1
ENSDARG00000100725	eph receptor B4a [Source:NCBI gene;Acc:30688]	ephb4a	-0.380492	0.0886224	1
ENSDARG00000074989	SPARC-like 1 [Source:ZFIN;Acc:ZDB-GENE-060130-6]	sparcl1	-0.309633	0.0887104	1
ENSDARG00000039517	complement component 8, beta polypeptide [Source:ZFIN;Acc:ZDB-GENE-070912-163]	c8b	0.466449	0.088712	1
ENSDARG00000114520		CR354547.3	3.09891	0.088995	1
ENSDARG00000070155	tubulin, alpha 8 like 3 [Source:ZFIN;Acc:ZDB-GENE-040801-77]	tuba8l3	-0.604809	0.089006	1
ENSDARG00000009677	discs, large homolog 1 (Drosophila) [Source:NCBI gene;Acc:114446]	dlg1	-0.281101	0.0890093	1
ENSDARG00000093230	si:ch211-139n6.3 [Source:ZFIN;Acc:ZDB-GENE-041111-114]	si:ch211-139n6.3	-1.36116	0.0890649	1
ENSDARG00000096397		BX511272.1	1.36805	0.0891126	1
ENSDARG00000054271	cyclin-dependent kinase inhibitor 1Bb [Source:ZFIN;Acc:ZDB-GENE-030521-13]	cdkn1bb	0.258053	0.0891264	1
ENSDARG00000070080	neurobeachin a [Source:ZFIN;Acc:ZDB-GENE-050320-68]	nbeaa	-0.263499	0.0892128	1
ENSDARG00000060751	TAO kinase 3a [Source:ZFIN;Acc:ZDB-GENE-100921-50]	taok3a	0.356315	0.0892311	1
ENSDARG00000114874		FP236318.4	0.427241	0.0895256	1
ENSDARG00000117607		FP102158.1	1.19679	0.0897445	1
ENSDARG00000097736		CR628365.1	1.96953	0.0897885	1
ENSDARG00000102378		CABZ01003056.1	-3.72274	0.0898262	1
ENSDARG00000043722	carboxypeptidase A4 [Source:ZFIN;Acc:ZDB-GENE-040704-61]	cpa4	-1.72657	0.0898806	1
ENSDARG00000079446	si:dkey-238f9.1 [Source:ZFIN;Acc:ZDB-GENE-091204-297]	TAFA3	-0.763752	0.0899043	1
ENSDARG00000077227	F-box and leucine-rich repeat protein 6 [Source:ZFIN;Acc:ZDB-GENE-060810-162]	fbxl6	0.367592	0.0899177	1
ENSDARG00000000767	Spi-1 proto-oncogene b [Source:ZFIN;Acc:ZDB-GENE-980526-164]	spi1b	0.842231	0.0899466	1
ENSDARG00000103517		CR759810.1	3.46053	0.0900284	1
ENSDARG00000101885	si:dkey-20i20.11 [Source:ZFIN;Acc:ZDB-GENE-060503-58]	si:dkey-20i20.11	0.838982	0.0900614	1
ENSDARG00000116723		BX470259.3	0.73157	0.0901039	1
ENSDARG00000094249	wu:fc17b08 [Source:ZFIN;Acc:ZDB-GENE-030131-2746]	wu:fc17b08	0.505884	0.0901695	1
ENSDARG00000071074	RCC1 domain containing 1 [Source:ZFIN;Acc:ZDB-GENE-030131-3552]	rccd1	0.624577	0.0902094	1
ENSDARG00000101748	si:ch211-24o8.4 [Source:ZFIN;Acc:ZDB-GENE-141212-253]	si:ch211-24o8.4	1.32961	0.0902385	1
ENSDARG00000002666	potassium inwardly rectifying channel subfamily J member 1b [Source:ZFIN;Acc:ZDB-GENE-070620-9]	kcnj1b	0.51968	0.0903669	1
ENSDARG00000117385		CABZ01031868.1	0.644458	0.090409	1
ENSDARG00000096419		CU659670.1	0.425447	0.0904393	1
ENSDARG00000029830	myogenic factor 6 [Source:NCBI gene;Acc:404208]	myf6	1.53304	0.0904652	1
ENSDARG00000086706	zgc:114175 [Source:ZFIN;Acc:ZDB-GENE-050913-109]	BMERB1	0.566496	0.0904973	1
ENSDARG00000034777	thioredoxin 2 [Source:ZFIN;Acc:ZDB-GENE-040426-1795]	txn2	0.318771	0.090692	1
ENSDARG00000005332	lipase, member Ib [Source:ZFIN;Acc:ZDB-GENE-091118-47]	lipib	0.496911	0.0907358	1
ENSDARG00000045447	solute carrier family 35 member G2b [Source:ZFIN;Acc:ZDB-GENE-050320-142]	slc35g2b	-0.421249	0.0911687	1
ENSDARG00000091320	NLR family CARD domain containing 6 [Source:ZFIN;Acc:ZDB-GENE-060421-8264]	nlrc6	0.654076	0.0912268	1
ENSDARG00000075812	potassium channel, subfamily T, member 2 [Source:ZFIN;Acc:ZDB-GENE-130530-783]	kcnt2	-2.50827	0.0915267	1
ENSDARG00000068716	CUE domain containing 1a [Source:ZFIN;Acc:ZDB-GENE-061027-344]	cuedc1a	0.32815	0.0917314	1
ENSDARG00000015752	zeta chain of T cell receptor associated protein kinase 70 [Source:ZFIN;Acc:ZDB-GENE-050522-257]	zap70	-2.01516	0.0918768	1
ENSDARG00000058753	si:ch73-213k20.5 [Source:ZFIN;Acc:ZDB-GENE-120727-11]	si:ch73-213k20.5	-0.758551	0.0920349	1
ENSDARG00000075133	adhesion G protein-coupled receptor B1a [Source:ZFIN;Acc:ZDB-GENE-060607-12]	adgrb1a	-0.338352	0.0920638	1
ENSDARG00000077252	si:rp71-36a1.5 [Source:ZFIN;Acc:ZDB-GENE-091204-428]	si:rp71-36a1.5	1.01349	0.0922137	1
ENSDARG00000052012	reticulon 4 receptor-like 2 a [Source:ZFIN;Acc:ZDB-GENE-040310-4]	rtn4rl2a	1.03501	0.0922358	1
ENSDARG00000069028	relaxin family peptide receptor 3.3a1 [Source:ZFIN;Acc:ZDB-GENE-121030-1]	rxfp3.3a1	-0.917845	0.0922373	1
ENSDARG00000041340	mitochondrial ribosomal protein L51 [Source:NCBI gene;Acc:797002]	mrpl51	0.401402	0.0923553	1
ENSDARG00000095578	si:dkey-222h21.7 [Source:ZFIN;Acc:ZDB-GENE-081031-33]	si:dkey-222h21.7	-3.53507	0.0924782	1
ENSDARG00000059388	3-hydroxybutyrate dehydrogenase, type 1 [Source:ZFIN;Acc:ZDB-GENE-070410-130]	bdh1	-0.51478	0.092655	1
ENSDARG00000103538		BX571954.2	1.407	0.0927731	1
ENSDARG00000062156	ABI family, member 3 (NESH) binding protein a [Source:ZFIN;Acc:ZDB-GENE-070912-325]	abi3bpa	1.61035	0.0928457	1
ENSDARG00000070038	retinol binding protein 2a, cellular [Source:ZFIN;Acc:ZDB-GENE-020320-2]	rbp2a	0.419671	0.0928763	1
ENSDARG00000071876	RELT like 2 [Source:ZFIN;Acc:ZDB-GENE-060421-6581]	rell2	0.762698	0.0929404	1
ENSDARG00000114081	syntaxin 10 [Source:ZFIN;Acc:ZDB-GENE-041111-53]	stx10	2.33575	0.0929563	1
ENSDARG00000059725	huntingtin interacting protein K [Source:ZFIN;Acc:ZDB-GENE-080515-6]	hypk	0.282	0.0929988	1
ENSDARG00000071454	C-reactive protein 1 [Source:ZFIN;Acc:ZDB-GENE-060503-314]	crp1	-3.55633	0.093153	1
ENSDARG00000115505	mannosyl (alpha-1,6-)-glycoprotein beta-1,6-N-acetyl-glucosaminyltransferase, isozyme B [Source:NCBI gene;Acc:101884072]	MGAT5B	-1.28729	0.0931993	1
ENSDARG00000092970	thymosin beta 2 [Source:ZFIN;Acc:ZDB-GENE-070126-5]	tmsb2	0.405287	0.0932226	1
ENSDARG00000061948	angiomotin like 2b [Source:ZFIN;Acc:ZDB-GENE-061103-307]	amotl2b	-0.509215	0.0933136	1
ENSDARG00000116404		CABZ01086574.1	1.2179	0.0934283	1
ENSDARG00000100084		CABZ01084603.1	0.346546	0.0934517	1
ENSDARG00000111619	histone 1, H4, like [Source:ZFIN;Acc:ZDB-GENE-070927-10]	hist1h4l	1.103	0.0935574	1
ENSDARG00000039516	complement component 8, alpha polypeptide [Source:ZFIN;Acc:ZDB-GENE-040801-239]	c8a	0.998175	0.0935693	1
ENSDARG00000097183		CU570976.1	1.67439	0.0935933	1
ENSDARG00000025168	membrane protein, palmitoylated 7b (MAGUK p55 subfamily member 7) [Source:ZFIN;Acc:ZDB-GENE-141212-293]	mpp7b	0.919426	0.0937174	1
ENSDARG00000097750		CR854827.3	1.68976	0.0939114	1
ENSDARG00000024954	transmembrane p24 trafficking protein 4 [Source:ZFIN;Acc:ZDB-GENE-040625-140]	tmed4	0.331799	0.093978	1
ENSDARG00000077845	si:ch211-67f13.7 [Source:ZFIN;Acc:ZDB-GENE-090313-126]	si:ch211-67f13.7	1.04244	0.0939844	1
ENSDARG00000060501	deleted in primary ciliary dyskinesia homolog (mouse) [Source:NCBI gene;Acc:751660]	dpcd	0.553042	0.0940209	1
ENSDARG00000105648	si:cabz01102082.1 [Source:ZFIN;Acc:ZDB-GENE-160728-40]	si:cabz01102082.1	0.290512	0.094067	1
ENSDARG00000040427	acyl-CoA thioesterase 19 [Source:ZFIN;Acc:ZDB-GENE-041114-124]	acot19	1.6862	0.0941383	1
ENSDARG00000008209	myelin transcription factor 1-like, a [Source:ZFIN;Acc:ZDB-GENE-041001-172]	myt1la	-0.316056	0.0941641	1
ENSDARG00000024276	poly(rC) binding protein 4 [Source:ZFIN;Acc:ZDB-GENE-040426-2122]	pcbp4	-0.267583	0.0941933	1
ENSDARG00000078363	mucolipin 3a [Source:ZFIN;Acc:ZDB-GENE-121116-4]	mcoln3a	1.06327	0.0943093	1
ENSDARG00000090844	interleukin-1 receptor type 1-like [Source:NCBI gene;Acc:799279]	CABZ01054965.1	1.00505	0.0943633	1
ENSDARG00000059315	olfactory receptor class A related 3 [Source:ZFIN;Acc:ZDB-GENE-100721-3]	ora3	-2.20216	0.0945817	1
ENSDARG00000095432		BX323074.2	0.899951	0.0949302	1
ENSDARG00000031749	C3a anaphylatoxin chemotactic receptor [Source:NCBI gene;Acc:794255]	C3AR1	1.24824	0.0949614	1
ENSDARG00000061362	divergent protein kinase domain 1Ab [Source:ZFIN;Acc:ZDB-GENE-131126-27]	dipk1ab	-0.84429	0.0952267	1
ENSDARG00000094350	si:ch211-187g4.1 [Source:ZFIN;Acc:ZDB-GENE-070912-161]	si:ch211-187g4.1	-3.5542	0.0952767	1
ENSDARG00000074376	MAM domain containing glycosylphosphatidylinositol anchor 1 [Source:ZFIN;Acc:ZDB-GENE-130530-751]	mdga1	-0.894869	0.0952822	1
ENSDARG00000098164	aryl hydrocarbon receptor interacting protein like 2 [Source:ZFIN;Acc:ZDB-GENE-141216-23]	aipl2	0.375066	0.0952956	1
ENSDARG00000005482	Rap guanine nucleotide exchange factor (GEF) 2 [Source:ZFIN;Acc:ZDB-GENE-030131-6959]	rapgef2	-0.251923	0.095419	1
ENSDARG00000094206	si:ch73-191k20.3 [Source:ZFIN;Acc:ZDB-GENE-090312-62]	si:ch73-191k20.3	1.42383	0.0954446	1
ENSDARG00000092067	atrophin 1 [Source:ZFIN;Acc:ZDB-GENE-030131-426]	atn1	-0.304754	0.0955497	1
ENSDARG00000014953	cornichon family AMPA receptor auxiliary protein 3 [Source:ZFIN;Acc:ZDB-GENE-041001-180]	cnih3	-0.620215	0.0955879	1
ENSDARG00000024687	polymerase (RNA) III (DNA directed) polypeptide G [Source:ZFIN;Acc:ZDB-GENE-081104-312]	polr3g	1.62617	0.0956804	1
ENSDARG00000023694	spondin 1b [Source:ZFIN;Acc:ZDB-GENE-000427-10]	spon1b	-0.335863	0.0957839	1
ENSDARG00000052188	zinc finger protein 541 [Source:ZFIN;Acc:ZDB-GENE-060526-239]	znf541	0.697712	0.095789	1
ENSDARG00000098958	zinc finger protein 1100 [Source:ZFIN;Acc:ZDB-GENE-120215-2]	znf1100	2.09738	0.0959534	1
ENSDARG00000058995	jumonji domain containing 4 [Source:NCBI gene;Acc:767690]	jmjd4	0.714957	0.0961884	1
ENSDARG00000090814	si:dkey-18a10.3 [Source:ZFIN;Acc:ZDB-GENE-091204-174]	si:dkey-18a10.3	1.55421	0.0962904	1
ENSDARG00000018492	zinc finger protein 503 [Source:NCBI gene;Acc:324913]	znf503	-0.277268	0.0963076	1
ENSDARG00000092341		AL590150.2	1.62203	0.0963178	1
ENSDARG00000117426		CU695222.2	4.76661	0.0963636	1
ENSDARG00000076814	granzyme 3, tandem duplicate 4 [Source:ZFIN;Acc:ZDB-GENE-070912-136]	gzm3.4	0.910207	0.0965115	1
ENSDARG00000110160	somatomedin B and thrombospondin type 1 domain containing [Source:NCBI gene;Acc:100151218]	SBSPON	-0.71777	0.0965624	1
ENSDARG00000070705	zgc:64022 [Source:ZFIN;Acc:ZDB-GENE-040426-1340]	zgc:64022	-0.961579	0.0966022	1
ENSDARG00000025206	synaptotagmin IIa [Source:ZFIN;Acc:ZDB-GENE-060503-315]	syt2a	-0.582231	0.0966077	1
ENSDARG00000041911	si:ch211-245h14.1 [Source:ZFIN;Acc:ZDB-GENE-041014-350]	si:ch211-245h14.1	1.33327	0.09663	1
ENSDARG00000097700	si:dkey-23k10.2 [Source:ZFIN;Acc:ZDB-GENE-131122-52]	si:dkey-23k10.2	-3.55889	0.0966706	1
ENSDARG00000060729	tripartite motif containing 8b [Source:ZFIN;Acc:ZDB-GENE-030131-4325]	trim8b	-0.265687	0.0968092	1
ENSDARG00000055123	potassium channel, subfamily K, member 2a [Source:ZFIN;Acc:ZDB-GENE-061226-2]	kcnk2a	-0.677638	0.0968213	1
ENSDARG00000096950		BX927244.1	-1.42278	0.0968408	1
ENSDARG00000092705		BX649384.2	3.85671	0.0969488	1
ENSDARG00000028066	DIRAS family, GTP-binding RAS-like 1a [Source:ZFIN;Acc:ZDB-GENE-030131-5788]	diras1a	-0.319595	0.0970058	1
ENSDARG00000103290	amyloid beta A4 precursor protein-binding family B member 2-like [Source:NCBI gene;Acc:101883245]	LO018568.2	-0.855985	0.0970065	1
ENSDARG00000116752		CR936300.2	1.16711	0.0971451	1
ENSDARG00000001781	tetraspanin 11 [Source:ZFIN;Acc:ZDB-GENE-041210-93]	tspan11	0.721189	0.097332	1
ENSDARG00000077499	pleckstrin homology domain containing, family O member 1b [Source:ZFIN;Acc:ZDB-GENE-100609-2]	plekho1b	0.304757	0.0975083	1
ENSDARG00000109508		BX323459.1	3.86287	0.0975422	1
ENSDARG00000111188	cytidine deaminase a [Source:ZFIN;Acc:ZDB-GENE-170609-2]	cdaa	1.51535	0.0976493	1
ENSDARG00000094488		BX510923.1	0.310324	0.0977644	1
ENSDARG00000088247	si:ch1073-303k11.2 [Source:ZFIN;Acc:ZDB-GENE-141216-99]	si:ch1073-303k11.2	0.621728	0.0978061	1
ENSDARG00000041915	stum, mechanosensory transduction mediator homolog [Source:NCBI gene;Acc:562918]	stum	-0.965916	0.0978248	1
ENSDARG00000101327	zinc finger protein 1076 [Source:ZFIN;Acc:ZDB-GENE-110913-64]	znf1076	1.49509	0.0978394	1
ENSDARG00000095081		CU657976.1	3.49708	0.0979148	1
ENSDARG00000099289	ST3 beta-galactoside alpha-2,3-sialyltransferase 1, like 3 [Source:ZFIN;Acc:ZDB-GENE-100922-174]	st3gal1l3	3.49711	0.0979209	1
ENSDARG00000076106	finTRIM family, member 43 [Source:ZFIN;Acc:ZDB-GENE-090507-8]	ftr43	3.49716	0.0979361	1
ENSDARG00000097613	immunoglobulin like and fibronectin type III domain containing 1, tandem duplicate 3 [Source:ZFIN;Acc:ZDB-GENE-131122-44]	igfn1.3	-2.15556	0.0979868	1
ENSDARG00000053656	lysophospholipase 2 [Source:ZFIN;Acc:ZDB-GENE-040426-1715]	lypla2	0.235683	0.0980144	1
ENSDARG00000040274	secretory carrier membrane protein 5b [Source:ZFIN;Acc:ZDB-GENE-120215-76]	scamp5b	0.287951	0.0980291	1
ENSDARG00000011809	microtubule associated monooxygenase, calponin and LIM domain containing 1 [Source:NCBI gene;Acc:568573]	mical1	-0.72148	0.0981208	1
ENSDARG00000056027	homeobox B8a [Source:NCBI gene;Acc:30343]	hoxb8a	-1.37728	0.0981591	1
ENSDARG00000014333	ORMDL sphingolipid biosynthesis regulator 1 [Source:NCBI gene;Acc:368632]	ormdl1	0.288032	0.0981726	1
ENSDARG00000038822	mannose receptor, C type 1b [Source:ZFIN;Acc:ZDB-GENE-070705-13]	mrc1b	0.545611	0.0982683	1
ENSDARG00000011113	cholinergic receptor, nicotinic, alpha 10a [Source:ZFIN;Acc:ZDB-GENE-060503-725]	chrna10a	0.399244	0.0982698	1
ENSDARG00000112323		CU179759.2	3.4784	0.0982907	1
ENSDARG00000007807	cytohesin 3a [Source:ZFIN;Acc:ZDB-GENE-120612-1]	cyth3a	0.279177	0.0983584	1
ENSDARG00000099196	complexin 3a [Source:ZFIN;Acc:ZDB-GENE-090313-349]	cplx3a	1.28276	0.0983749	1
ENSDARG00000075694	adenosine A1 receptor b [Source:ZFIN;Acc:ZDB-GENE-081105-156]	adora1b	0.752724	0.0984354	1
ENSDARG00000005828	Fas apoptotic inhibitory molecule a [Source:ZFIN;Acc:ZDB-GENE-040718-323]	faima	0.589871	0.098651	1
ENSDARG00000009942	cell division cycle 6 homolog (S. cerevisiae) [Source:ZFIN;Acc:ZDB-GENE-050506-131]	cdc6	-0.385252	0.0986511	1
ENSDARG00000095152	si:ch211-255i3.4 [Source:ZFIN;Acc:ZDB-GENE-100922-237]	si:ch211-255i3.4	0.448219	0.0987422	1
ENSDARG00000078908	F-box protein 41 [Source:ZFIN;Acc:ZDB-GENE-090313-350]	fbxo41	-0.683936	0.0989588	1
ENSDARG00000102601	si:dkey-15h8.15 [Source:ZFIN;Acc:ZDB-GENE-050208-626]	si:dkey-15h8.15	0.563239	0.0989737	1
ENSDARG00000093048	si:ch211-158d24.4 [Source:ZFIN;Acc:ZDB-GENE-081104-141]	si:ch211-158d24.4	0.973487	0.0992431	1
ENSDARG00000021140	poly A binding protein, cytoplasmic 1 b [Source:ZFIN;Acc:ZDB-GENE-050308-1]	pabpc1b	-0.277263	0.0992846	1
ENSDARG00000076566	KN motif and ankyrin repeat domains 3 [Source:ZFIN;Acc:ZDB-GENE-081105-185]	kank3	-0.482607	0.0993352	1
ENSDARG00000095282		BX950187.1	1.0411	0.0994524	1
ENSDARG00000033126	PRKR interacting protein 1 [Source:NCBI gene;Acc:550595]	prkrip1	0.428074	0.0994832	1
ENSDARG00000060434	microtubule-associated protein 1B [Source:ZFIN;Acc:ZDB-GENE-130530-690]	map1b	-0.312912	0.0995255	1
ENSDARG00000096908	si:ch73-185c24.2 [Source:ZFIN;Acc:ZDB-GENE-131121-189]	si:ch73-185c24.2	-3.74132	0.0995738	1
ENSDARG00000077710	neuroligin 1 [Source:ZFIN;Acc:ZDB-GENE-090918-1]	nlgn1	-0.668067	0.0995995	1
ENSDARG00000045087	cyclin-dependent kinase 5, regulatory subunit 1b (p35) [Source:ZFIN;Acc:ZDB-GENE-040718-220]	cdk5r1b	-0.323063	0.0996688	1
ENSDARG00000115428	transmembrane protein 43-like [Source:NCBI gene;Acc:101882355]	CABZ01101813.1	0.477659	0.0997015	1
ENSDARG00000075597	fibronectin leucine rich transmembrane protein 1b [Source:ZFIN;Acc:ZDB-GENE-080327-6]	flrt1b	0.315643	0.0997302	1
ENSDARG00000097874		BX548170.1	1.32052	0.0997839	1
ENSDARG00000015449	fucosyltransferase 8a (alpha (1,6) fucosyltransferase) [Source:ZFIN;Acc:ZDB-GENE-031118-20]	fut8a	-0.266771	0.0997902	1
ENSDARG00000116344	L antigen family member 3 [Source:NCBI gene;Acc:100536597]	CABZ01063556.1	0.430309	0.0998048	1
ENSDARG00000117336		CU855948.1	0.92527	0.0998318	1
ENSDARG00000060504	phosphofructokinase, liver a [Source:ZFIN;Acc:ZDB-GENE-121207-1]	pfkla	-0.642034	0.0998895	1
ENSDARG00000061101	sorting nexin 19a [Source:ZFIN;Acc:ZDB-GENE-060526-204]	snx19a	0.30011	0.0999095	1
ENSDARG00000109841		BX664742.3	3.16301	0.100034	1
ENSDARG00000092558	odorant receptor, family E, subfamily 123, member 1 [Source:ZFIN;Acc:ZDB-GENE-070806-86]	or123-1	3.84449	0.100038	1
ENSDARG00000087046	si:ch211-222k6.2 [Source:ZFIN;Acc:ZDB-GENE-030131-9038]	si:ch211-222k6.2	0.705315	0.10005	1
ENSDARG00000079129	opsin 4xa [Source:ZFIN;Acc:ZDB-GENE-110622-1]	opn4xa	-0.804569	0.100054	1
ENSDARG00000068233	zgc:64051 [Source:ZFIN;Acc:ZDB-GENE-040426-1349]	zgc:64051	0.821504	0.100071	1
ENSDARG00000088171	circadian associated repressor of transcription b [Source:ZFIN;Acc:ZDB-GENE-131127-285]	ciartb	0.569533	0.100113	1
ENSDARG00000013607	sema domain, immunoglobulin domain (Ig), short basic domain, secreted, (semaphorin) 3Gb [Source:ZFIN;Acc:ZDB-GENE-050513-4]	sema3gb	-0.4873	0.100159	1
ENSDARG00000110323	zinc finger protein 986 [Source:ZFIN;Acc:ZDB-GENE-110913-135]	znf986	0.816103	0.100298	1
ENSDARG00000026281	LYR motif containing 1 [Source:NCBI gene;Acc:436779]	lyrm1	0.658621	0.100308	1
ENSDARG00000114125	si:dkey-261m9.19 [Source:ZFIN;Acc:ZDB-GENE-131121-76]	si:dkey-261m9.19	2.17911	0.100356	1
ENSDARG00000100402	FYVE, RhoGEF and PH domain containing 1 [Source:ZFIN;Acc:ZDB-GENE-081104-33]	fgd1	0.361719	0.100373	1
ENSDARG00000102375	si:ch211-204c21.1 [Source:ZFIN;Acc:ZDB-GENE-030429-35]	si:ch211-204c21.1	0.995361	0.100439	1
ENSDARG00000055026	patched 2 [Source:NCBI gene;Acc:30181]	ptch2	-0.557121	0.100502	1
ENSDARG00000060093	death-associated protein kinase 1 [Source:ZFIN;Acc:ZDB-GENE-060526-177]	dapk1	-0.326557	0.10053	1
ENSDARG00000113268		BX005397.1	-0.838628	0.101028	1
ENSDARG00000054610	coronin, actin binding protein, 1A [Source:ZFIN;Acc:ZDB-GENE-030131-9512]	coro1a	0.60597	0.101053	1
ENSDARG00000088402	rubicon like autophagy enhancer [Source:ZFIN;Acc:ZDB-GENE-070912-256]	rubcnl	-1.48671	0.101217	1
ENSDARG00000002344	tubulin, beta 4B class IVb [Source:ZFIN;Acc:ZDB-GENE-030131-8625]	tubb4b	-0.218563	0.101275	1
ENSDARG00000026784	roundabout, axon guidance receptor, homolog 1 (Drosophila) [Source:ZFIN;Acc:ZDB-GENE-000209-3]	robo1	-0.383836	0.101344	1
ENSDARG00000102639	si:dkey-29d5.2 [Source:ZFIN;Acc:ZDB-GENE-090312-83]	si:dkey-29d5.2	-4.25118	0.101382	1
ENSDARG00000094324	EGF containing fibulin extracellular matrix protein 2a [Source:ZFIN;Acc:ZDB-GENE-041212-8]	efemp2a	-1.09435	0.101869	1
ENSDARG00000115416	uncharacterized LOC101883274 [Source:NCBI gene;Acc:101883274]	BX649556.2	2.91634	0.102248	1
ENSDARG00000036272	glucagon receptor b [Source:ZFIN;Acc:ZDB-GENE-050516-2]	gcgrb	1.08327	0.102254	1
ENSDARG00000110500		CABZ01081897.1	0.768177	0.102326	1
ENSDARG00000115015	L-seryl-tRNA(Sec) kinase-like [Source:NCBI gene;Acc:103911967]		0.612632	0.102407	1
ENSDARG00000029445	eukaryotic translation initiation factor 1B [Source:ZFIN;Acc:ZDB-GENE-040426-1109]	eif1b	0.248827	0.102457	1
ENSDARG00000095175	si:dkey-78l4.12 [Source:ZFIN;Acc:ZDB-GENE-060503-364]	si:dkey-78l4.12	-3.54407	0.102623	1
ENSDARG00000111753	histone 1, H4, like [Source:ZFIN;Acc:ZDB-GENE-070927-10]	hist1h4l	2.10481	0.102682	1
ENSDARG00000074070	iroquois homeobox 5b [Source:ZFIN;Acc:ZDB-GENE-040628-5]	irx5b	-0.676315	0.102713	1
ENSDARG00000098779		BX547930.4	1.00405	0.103061	1
ENSDARG00000102873		CT956002.2	1.39765	0.103317	1
ENSDARG00000092725	si:dkey-188i13.8 [Source:ZFIN;Acc:ZDB-GENE-090312-93]	si:dkey-188i13.8	2.13234	0.103369	1
ENSDARG00000061752	RHO family interacting cell polarization regulator 2 [Source:NCBI gene;Acc:563800]	ripor2	0.264516	0.10339	1
ENSDARG00000010183	si:ch73-265h17.1 [Source:ZFIN;Acc:ZDB-GENE-131121-358]	si:ch73-265h17.1	1.1298	0.103488	1
ENSDARG00000039309	hook microtubule-tethering protein 2 [Source:ZFIN;Acc:ZDB-GENE-040426-1636]	hook2	0.63235	0.103864	1
ENSDARG00000104110	collagen, type IV, alpha 2 [Source:ZFIN;Acc:ZDB-GENE-070725-3]	col4a2	-0.662374	0.103891	1
ENSDARG00000098430	zinc finger protein 1078 [Source:ZFIN;Acc:ZDB-GENE-080218-3]	znf1078	1.48422	0.103895	1
ENSDARG00000093697	si:dkey-217m5.8 [Source:ZFIN;Acc:ZDB-GENE-041014-319]	si:dkey-217m5.8	2.01847	0.104092	1
ENSDARG00000040249	toll-like receptor 18 [Source:ZFIN;Acc:ZDB-GENE-040220-2]	tlr18	-0.665005	0.104114	1
ENSDARG00000021735	calcium channel, voltage-dependent, N type, alpha 1B subunit, a [Source:ZFIN;Acc:ZDB-GENE-060531-44]	cacna1ba	-0.550973	0.104146	1
ENSDARG00000002355	sedoheptulokinase [Source:ZFIN;Acc:ZDB-GENE-060526-357]	shpk	-0.832014	0.104213	1
ENSDARG00000013615	pre-B-cell leukemia homeobox 3b [Source:ZFIN;Acc:ZDB-GENE-000405-3]	pbx3b	-0.278431	0.104229	1
ENSDARG00000095667	zinc finger protein 1175 [Source:ZFIN;Acc:ZDB-GENE-050420-13]	znf1175	0.674049	0.104284	1
ENSDARG00000104425	purinergic receptor P2Y2, tandem duplicate 3 [Source:ZFIN;Acc:ZDB-GENE-091204-458]	p2ry2.3	-3.52966	0.104492	1
ENSDARG00000100463		BX908799.1	2.23537	0.104494	1
ENSDARG00000111822	receptor activity modifying protein 3 [Source:HGNC Symbol;Acc:HGNC:9845]	RAMP3	0.543649	0.104529	1
ENSDARG00000062752	microfibril associated protein 3 like [Source:ZFIN;Acc:ZDB-GENE-111229-2]	mfap3l	0.241732	0.104543	1
ENSDARG00000113721	4-hydroxyphenylpyruvate dioxygenase-like protein [Source:NCBI gene;Acc:110438534]	HPDL	0.696029	0.104658	1
ENSDARG00000016923	si:dkey-94f20.4 [Source:ZFIN;Acc:ZDB-GENE-121214-276]	si:dkey-94f20.4	0.621264	0.104716	1
ENSDARG00000096530		AL929396.1	1.54509	0.104728	1
ENSDARG00000100325		FQ377896.1	0.88172	0.104739	1
ENSDARG00000099943	microtubule-associated protein, RP/EB family, member 2 [Source:ZFIN;Acc:ZDB-GENE-071004-41]	mapre2	0.242702	0.104822	1
ENSDARG00000059057	ATPase H+ transporting V0 subunit e2 [Source:ZFIN;Acc:ZDB-GENE-050522-135]	atpv0e2	0.268927	0.104858	1
ENSDARG00000096635	si:ch211-122h15.4 [Source:ZFIN;Acc:ZDB-GENE-121214-340]	si:ch211-122h15.4	0.775708	0.104881	1
ENSDARG00000088753	cilia and flagella associated protein 299 [Source:NCBI gene;Acc:558475]	cfap299	-1.57124	0.104931	1
ENSDARG00000093512	si:dkey-238j22.1 [Source:ZFIN;Acc:ZDB-GENE-070705-398]	si:dkey-238j22.1	2.14774	0.104969	1
ENSDARG00000097058		CU929339.1	0.723563	0.105017	1
ENSDARG00000104974	SLAIN motif family, member 1b [Source:ZFIN;Acc:ZDB-GENE-080516-6]	slain1b	0.445491	0.105112	1
ENSDARG00000033182	ADP-ribosylation factor-like 4ab [Source:ZFIN;Acc:ZDB-GENE-030219-167]	arl4ab	-0.428606	0.1052	1
ENSDARG00000010294	fibromodulin b [Source:ZFIN;Acc:ZDB-GENE-080327-28]	fmodb	1.80469	0.105292	1
ENSDARG00000088740	3-hydroxymethyl-3-methylglutaryl-CoA lyase-like 1 [Source:NCBI gene;Acc:571388]	hmgcll1	-2.15646	0.105318	1
ENSDARG00000063229	exportin 1 (CRM1 homolog, yeast) b [Source:ZFIN;Acc:ZDB-GENE-070530-6]	xpo1b	-0.228456	0.105336	1
ENSDARG00000074723	myosin X, like 1 [Source:ZFIN;Acc:ZDB-GENE-080425-1]	myo10l1	-0.40866	0.105365	1
ENSDARG00000036587	carbonyl reductase 1 [Source:ZFIN;Acc:ZDB-GENE-030902-2]	cbr1	0.476684	0.105503	1
ENSDARG00000059175	centrosomal protein 19 [Source:NCBI gene;Acc:619252]	cep19	0.712565	0.105733	1
ENSDARG00000097433		CT027718.1	2.30358	0.105784	1
ENSDARG00000070433	VPS18 core subunit of CORVET and HOPS complexes [Source:NCBI gene;Acc:100005887]	vps18	-0.260045	0.105919	1
ENSDARG00000098402	neurexophilin 1 [Source:NCBI gene;Acc:100148066]		-2.35593	0.105961	1
ENSDARG00000054218	si:ch73-269m23.5 [Source:ZFIN;Acc:ZDB-GENE-110411-68]	si:ch73-269m23.5	2.06566	0.105971	1
ENSDARG00000094181	shroom family member 1 [Source:ZFIN;Acc:ZDB-GENE-091204-385]	shroom1	-0.691378	0.106065	1
ENSDARG00000102013		FP009765.1	2.61732	0.106145	1
ENSDARG00000068996	histone 2, H2, like [Source:NCBI gene;Acc:386920]	hist2h2l	-0.281876	0.106297	1
ENSDARG00000060471	glucosaminyl (N-acetyl) transferase 3, mucin type [Source:ZFIN;Acc:ZDB-GENE-110411-253]	gcnt3	-1.28041	0.106453	1
ENSDARG00000069264	si:ch211-196h16.5 [Source:ZFIN;Acc:ZDB-GENE-081029-8]	si:ch211-196h16.5	0.692811	0.106473	1
ENSDARG00000036549	1-acylglycerol-3-phosphate O-acyltransferase 3 [Source:ZFIN;Acc:ZDB-GENE-040426-2765]	agpat3	0.232037	0.106486	1
ENSDARG00000005026	teashirt zinc finger homeobox 1 [Source:NCBI gene;Acc:369196]	tshz1	-0.272334	0.106519	1
ENSDARG00000019507	minichromosome maintenance complex component 5 [Source:ZFIN;Acc:ZDB-GENE-021209-1]	mcm5	-0.246299	0.106592	1
ENSDARG00000105355	zgc:154164 [Source:ZFIN;Acc:ZDB-GENE-060929-1050]	zgc:154164	1.16803	0.106597	1
ENSDARG00000104468	si:dkeyp-107f9.4 [Source:ZFIN;Acc:ZDB-GENE-120709-91]	si:dkeyp-107f9.4	-3.74651	0.106682	1
ENSDARG00000100653	si:dkeyp-82b4.6 [Source:ZFIN;Acc:ZDB-GENE-110914-71]	si:dkeyp-82b4.6	-3.74651	0.10671	1
ENSDARG00000092170	apolipoprotein C-I [Source:ZFIN;Acc:ZDB-GENE-030131-1074]	apoc1	0.685886	0.106716	1
ENSDARG00000111944		CU928071.1	2.07088	0.106964	1
ENSDARG00000094799	plexin b2a [Source:ZFIN;Acc:ZDB-GENE-030131-8917]	plxnb2a	1.36686	0.107043	1
ENSDARG00000109527		BX000363.2	1.04946	0.10705	1
ENSDARG00000090870	si:ch1073-263o8.2 [Source:ZFIN;Acc:ZDB-GENE-030131-5362]	si:ch1073-263o8.2	-2.33837	0.107072	1
ENSDARG00000111528	phosphatidylinositol transfer protein membrane associated 2 [Source:HGNC Symbol;Acc:HGNC:21044]	PITPNM2	0.293754	0.107187	1
ENSDARG00000001953	6-phosphofructo-2-kinase/fructose-2,6-biphosphatase 3 [Source:ZFIN;Acc:ZDB-GENE-040426-2724]	pfkfb3	0.382338	0.107347	1
ENSDARG00000111827	recoverin b [Source:ZFIN;Acc:ZDB-GENE-120815-1]	rcvrnb	0.795737	0.107358	1
ENSDARG00000073978	cellular retinoic acid binding protein 2, a [Source:ZFIN;Acc:ZDB-GENE-020320-4]	crabp2a	-0.295995	0.107555	1
ENSDARG00000105456		FO834831.1	1.98891	0.107651	1
ENSDARG00000030161	protein phosphatase 1, regulatory (inhibitor) subunit 14Bb [Source:ZFIN;Acc:ZDB-GENE-030616-595]	ppp1r14bb	0.26906	0.107802	1
ENSDARG00000093699	si:ch73-27e22.4 [Source:ZFIN;Acc:ZDB-GENE-070705-232]	si:ch73-27e22.4	1.23963	0.107863	1
ENSDARG00000010244	ribosomal protein L22-like 1 [Source:ZFIN;Acc:ZDB-GENE-060804-3]	rpl22l1	0.285407	0.107871	1
ENSDARG00000070885		AL953867.1	2.7658	0.107948	1
ENSDARG00000104435	si:ch73-217b7.1 [Source:ZFIN;Acc:ZDB-GENE-050208-210]	si:ch73-217b7.1	0.255346	0.107958	1
ENSDARG00000097726	si:ch211-149e23.4 [Source:ZFIN;Acc:ZDB-GENE-131121-606]	si:ch211-149e23.4	2.76578	0.107959	1
ENSDARG00000079892	si:dkey-183c2.4 [Source:ZFIN;Acc:ZDB-GENE-041210-121]	si:dkey-183c2.4	-1.52488	0.107977	1
ENSDARG00000036912	endothelin 1 [Source:ZFIN;Acc:ZDB-GENE-000920-1]	edn1	-0.972104	0.107982	1
ENSDARG00000070504	transient receptor potential cation channel, subfamily C, member 5a [Source:ZFIN;Acc:ZDB-GENE-040812-1]	trpc5a	-1.71045	0.10801	1
ENSDARG00000078522	si:ch211-80h18.1 [Source:ZFIN;Acc:ZDB-GENE-070705-257]	si:ch211-80h18.1	-0.932314	0.108144	1
ENSDARG00000069324	VPS53 subunit of GARP complex [Source:ZFIN;Acc:ZDB-GENE-041114-199]	vps53	-0.275632	0.108304	1
ENSDARG00000018404	keratin 18a, tandem duplicate 1 [Source:NCBI gene;Acc:352912]	krt18a.1	-0.471129	0.108321	1
ENSDARG00000113103	growth arrest and DNA damage-inducible protein GADD45 gamma-like [Source:NCBI gene;Acc:797032]	GADD45G	0.529764	0.108354	1
ENSDARG00000005541	wnt inhibitory factor 1 [Source:NCBI gene;Acc:30476]	wif1	-0.52319	0.108449	1
ENSDARG00000028957	v-maf avian musculoaponeurotic fibrosarcoma oncogene homolog F [Source:ZFIN;Acc:ZDB-GENE-040426-1280]	maff	0.254299	0.108456	1
ENSDARG00000094736	zinc finger protein 1157 [Source:ZFIN;Acc:ZDB-GENE-070424-89]	znf1157	0.631457	0.108496	1
ENSDARG00000044098	early growth response 2a [Source:ZFIN;Acc:ZDB-GENE-030723-6]	egr2a	-0.871172	0.108531	1
ENSDARG00000110990		BX908796.2	2.07162	0.108583	1
ENSDARG00000031438	potassium inwardly rectifying channel subfamily J member 11, like [Source:ZFIN;Acc:ZDB-GENE-050222-2]	kcnj11l	0.416321	0.108699	1
ENSDARG00000030650	R3H domain containing-like [Source:ZFIN;Acc:ZDB-GENE-090313-275]	r3hdml	-1.19545	0.108739	1
ENSDARG00000104659		CABZ01109604.1	0.451567	0.108882	1
ENSDARG00000079443	vasoactive intestinal peptide b [Source:ZFIN;Acc:ZDB-GENE-080225-22]	vipb	-2.19504	0.108928	1
ENSDARG00000077249	GEM interacting protein [Source:ZFIN;Acc:ZDB-GENE-130530-823]	gmip	0.315392	0.108989	1
ENSDARG00000008398	calcium channel, voltage-dependent, L type, alpha 1C subunit [Source:ZFIN;Acc:ZDB-GENE-020129-1]	cacna1c	-0.61586	0.109007	1
ENSDARG00000051795	si:dkeyp-110c12.3 [Source:ZFIN;Acc:ZDB-GENE-131126-68]	si:dkeyp-110c12.3	2.09878	0.109165	1
ENSDARG00000076943	LHFPL tetraspan subfamily member 4b [Source:ZFIN;Acc:ZDB-GENE-110216-4]	lhfpl4b	-0.814272	0.109188	1
ENSDARG00000103834	RNA binding motif protein 14b [Source:ZFIN;Acc:ZDB-GENE-040426-2455]	rbm14b	0.298918	0.109271	1
ENSDARG00000013087	ndrg family member 3a [Source:ZFIN;Acc:ZDB-GENE-980526-124]	ndrg3a	-0.259656	0.109276	1
ENSDARG00000076624	protein tyrosine phosphatase receptor type b [Source:ZFIN;Acc:ZDB-GENE-101108-3]	ptprb	-0.459654	0.109364	1
ENSDARG00000111069	leucine-rich repeat LGI family, member 2a [Source:ZFIN;Acc:ZDB-GENE-060217-2]	lgi2a	-0.843352	0.109428	1
ENSDARG00000106062	frizzled class receptor 1 [Source:ZFIN;Acc:ZDB-GENE-990415-219]	fzd1	-0.450873	0.109534	1
ENSDARG00000104956	si:dkey-165o8.2 [Source:ZFIN;Acc:ZDB-GENE-131122-2]	si:dkey-165o8.2	-1.62865	0.109657	1
ENSDARG00000057833	GULP PTB domain containing engulfment adaptor 1b [Source:ZFIN;Acc:ZDB-GENE-120228-2]	gulp1b	0.594328	0.109804	1
ENSDARG00000096463	si:dkeyp-82h4.1 [Source:ZFIN;Acc:ZDB-GENE-120709-49]	si:dkeyp-82h4.1	2.5005	0.10981	1
ENSDARG00000002988	troponin T2d, cardiac [Source:ZFIN;Acc:ZDB-GENE-050626-97]	tnnt2d	-0.583182	0.109925	1
ENSDARG00000117617		CABZ01077121.1	1.65046	0.110025	1
ENSDARG00000052139	notch receptor 3 [Source:ZFIN;Acc:ZDB-GENE-000329-5]	notch3	-0.232586	0.110097	1
ENSDARG00000057859	homeobox D10a [Source:NCBI gene;Acc:30404]	hoxd10a	-3.49153	0.110204	1
ENSDARG00000063519	si:ch211-176g13.7 [Source:ZFIN;Acc:ZDB-GENE-030131-7664]	PLEKHB1	0.510786	0.110307	1
ENSDARG00000001559	CUB and Sushi multiple domains 2 [Source:ZFIN;Acc:ZDB-GENE-030616-39]	csmd2	-0.626957	0.110336	1
ENSDARG00000117709		CU929094.2	-3.68289	0.110358	1
ENSDARG00000074160	progestin and adipoQ receptor family member IVb [Source:ZFIN;Acc:ZDB-GENE-121214-338]	paqr4b	0.899082	0.11038	1
ENSDARG00000035578	heparan sulfate (glucosamine) 3-O-sulfotransferase 1-like 2 [Source:ZFIN;Acc:ZDB-GENE-070202-3]	hs3st1l2	-0.470779	0.110435	1
ENSDARG00000074310	RNA binding fox-1 homolog 3b [Source:ZFIN;Acc:ZDB-GENE-091204-46]	rbfox3b	-0.840582	0.11045	1
ENSDARG00000004291	HECT, C2 and WW domain containing E3 ubiquitin protein ligase 1b [Source:ZFIN;Acc:ZDB-GENE-060503-2]	hecw1b	-0.340187	0.110615	1
ENSDARG00000091230		CR450686.1	-3.58122	0.11071	1
ENSDARG00000109729		CABZ01073197.1	2.11646	0.110825	1
ENSDARG00000038283	wingless-type MMTV integration site family, member 6a [Source:ZFIN;Acc:ZDB-GENE-111114-1]	wnt6a	0.934942	0.110825	1
ENSDARG00000097868		BX294160.1	0.899186	0.110954	1
ENSDARG00000099023	SLAM family member 9-like [Source:NCBI gene;Acc:100536572]	CABZ01034698.1	0.952114	0.110955	1
ENSDARG00000100635	chitinase, acidic.1 [Source:ZFIN;Acc:ZDB-GENE-040426-1994]	chia.1	-1.104	0.111133	1
ENSDARG00000092228	si:dkey-27p18.3 [Source:ZFIN;Acc:ZDB-GENE-060526-287]	si:dkey-27p18.3	1.16556	0.111163	1
ENSDARG00000002758	death effector domain-containing 1 [Source:ZFIN;Acc:ZDB-GENE-000616-2]	dedd1	0.304741	0.111194	1
ENSDARG00000076317	procollagen-lysine, 2-oxoglutarate 5-dioxygenase 3 [Source:ZFIN;Acc:ZDB-GENE-021031-4]	plod3	-0.320661	0.111317	1
ENSDARG00000060372	plexin A2 [Source:ZFIN;Acc:ZDB-GENE-090311-6]	plxna2	-0.272966	0.111365	1
ENSDARG00000068436	si:ch1073-429i10.3 [Source:ZFIN;Acc:ZDB-GENE-120214-5]	si:ch1073-429i10.3	0.274332	0.111474	1
ENSDARG00000099874	ArfGAP with GTPase domain, ankyrin repeat and PH domain 2 [Source:ZFIN;Acc:ZDB-GENE-061103-343]	agap2	-0.549156	0.111704	1
ENSDARG00000070495	si:ch211-243g6.3 [Source:ZFIN;Acc:ZDB-GENE-121214-124]	FRMD7	0.65956	0.111742	1
ENSDARG00000076602	serine protease 16 [Source:ZFIN;Acc:ZDB-GENE-070112-732]	prss16	-0.320195	0.111774	1
ENSDARG00000019532	fatty acid desaturase 2 [Source:NCBI gene;Acc:140615]	fads2	-0.698304	0.111871	1
ENSDARG00000092533	si:ch211-133l5.4 [Source:ZFIN;Acc:ZDB-GENE-081104-114]	si:ch211-133l5.4	0.833208	0.111921	1
ENSDARG00000094064		CR788236.1	1.63558	0.111937	1
ENSDARG00000075555	ADAM metallopeptidase with thrombospondin type 1 motif, 17 [Source:ZFIN;Acc:ZDB-GENE-121030-7]	adamts17	-0.870184	0.112001	1
ENSDARG00000061918	complexin 2 [Source:ZFIN;Acc:ZDB-GENE-081113-1]	cplx2	-0.283198	0.112055	1
ENSDARG00000097853		CR792439.1	1.09626	0.11207	1
ENSDARG00000087749	coiled-coil serine-rich protein 2a [Source:ZFIN;Acc:ZDB-GENE-131121-492]	ccser2a	0.251058	0.112146	1
ENSDARG00000063588	ubiquitin-like modifier activating enzyme 5 [Source:NCBI gene;Acc:386712]	uba5	0.332399	0.112245	1
ENSDARG00000100654	si:dkey-207m2.4 [Source:ZFIN;Acc:ZDB-GENE-081103-58]	si:dkey-207m2.4	1.10791	0.112275	1
ENSDARG00000099695	si:dkey-61n16.5 [Source:ZFIN;Acc:ZDB-GENE-100922-235]	si:dkey-61n16.5	0.323112	0.112392	1
ENSDARG00000104292	cellular communication network factor 2b [Source:ZFIN;Acc:ZDB-GENE-070705-82]	ccn2b	-0.733605	0.112475	1
ENSDARG00000105414	zgc:112234 [Source:NCBI gene;Acc:554097]	zgc:112234	2.8848	0.11258	1
ENSDARG00000026248	solute carrier family 1 member 7b [Source:ZFIN;Acc:ZDB-GENE-101111-7]	slc1a7b	0.378729	0.112666	1
ENSDARG00000114937		CABZ01073033.2	0.864297	0.112676	1
ENSDARG00000111648	histone cluster 1 H2A family member 3 [Source:ZFIN;Acc:ZDB-GENE-070822-28]	hist1h2a3	1.36705	0.112715	1
ENSDARG00000076443	si:dkey-183c6.8 [Source:ZFIN;Acc:ZDB-GENE-160728-23]	si:dkey-183c6.8	-0.452494	0.112758	1
ENSDARG00000019686	fibrinogen-like 2b [Source:ZFIN;Acc:ZDB-GENE-120709-53]	fgl2b	1.31326	0.112768	1
ENSDARG00000099035	protocadherin 1 gamma 33 [Source:ZFIN;Acc:ZDB-GENE-071004-76]	pcdh1g33	0.720855	0.112787	1
ENSDARG00000044956	zgc:114123 [Source:ZFIN;Acc:ZDB-GENE-050913-53]	zgc:114123	2.32788	0.112795	1
ENSDARG00000030733	beta-1,3-glucuronyltransferase 2 (glucuronosyltransferase S) [Source:ZFIN;Acc:ZDB-GENE-040801-191]	b3gat2	-0.393245	0.112847	1
ENSDARG00000116725		CABZ01114053.1	0.295534	0.113016	1
ENSDARG00000033367	ribonucleotide reductase M2 b [Source:ZFIN;Acc:ZDB-GENE-030616-614]	rrm2b	0.290817	0.113032	1
ENSDARG00000112256	ribonuclease P and MRP subunit p25, b [Source:ZFIN;Acc:ZDB-GENE-170530-4]	rpp25b	-0.908525	0.113082	1
ENSDARG00000039256	striated muscle enriched protein kinase a [Source:NCBI gene;Acc:570504]	spega	-0.654001	0.113104	1
ENSDARG00000005840	glutamic-oxaloacetic transaminase 2b, mitochondrial [Source:ZFIN;Acc:ZDB-GENE-030131-7917]	got2b	0.237723	0.113148	1
ENSDARG00000117371		CABZ01118767.1	0.445332	0.11352	1
ENSDARG00000093835	si:ch211-165f21.4 [Source:ZFIN;Acc:ZDB-GENE-060503-200]	si:ch211-165f21.4	3.79967	0.113588	1
ENSDARG00000117424		BX855590.1	3.79984	0.113611	1
ENSDARG00000057575	purine nucleoside phosphorylase 4a [Source:ZFIN;Acc:ZDB-GENE-040625-83]	pnp4a	-0.331193	0.113633	1
ENSDARG00000098049		BX248121.1	0.363792	0.113648	1
ENSDARG00000039754	xeroderma pigmentosum, complementation group C [Source:ZFIN;Acc:ZDB-GENE-030131-8461]	xpc	0.299301	0.113774	1
ENSDARG00000056656	tetraspanin 18a [Source:ZFIN;Acc:ZDB-GENE-040718-232]	tspan18a	-0.487905	0.113817	1
ENSDARG00000001807	tumor necrosis factor receptor superfamily, member 21 [Source:ZFIN;Acc:ZDB-GENE-030131-5971]	tnfrsf21	0.284731	0.113888	1
ENSDARG00000006944	glycerophosphodiester phosphodiesterase domain containing 3b [Source:ZFIN;Acc:ZDB-GENE-121210-2]	gdpd3b	1.64967	0.114011	1
ENSDARG00000023537	aryl hydrocarbon receptor 1b [Source:ZFIN;Acc:ZDB-GENE-050922-1]	ahr1b	-0.266027	0.114146	1
ENSDARG00000003994	synaptotagmin IXa [Source:ZFIN;Acc:ZDB-GENE-031002-18]	syt9a	-0.775549	0.114249	1
ENSDARG00000096191	si:ch211-112b1.2 [Source:ZFIN;Acc:ZDB-GENE-110914-236]	si:ch211-112b1.2	-1.87666	0.114589	1
ENSDARG00000095863	antifreeze protein type IV [Source:ZFIN;Acc:ZDB-GENE-030131-5217]	afp4	1.4779	0.114653	1
ENSDARG00000077275	cysteine-rich secretory protein LCCL domain containing 1a [Source:ZFIN;Acc:ZDB-GENE-090612-1]	crispld1a	0.720484	0.114653	1
ENSDARG00000091029	paired like homeobox 2Bb [Source:ZFIN;Acc:ZDB-GENE-050407-3]	phox2bb	-1.11314	0.114832	1
ENSDARG00000098353		BX322574.1	0.855996	0.114896	1
ENSDARG00000076002	oxysterol binding protein-like 5 [Source:ZFIN;Acc:ZDB-GENE-030131-5872]	osbpl5	-0.28729	0.114926	1
ENSDARG00000069632	epithelial membrane protein 1 [Source:ZFIN;Acc:ZDB-GENE-070822-2]	emp1	0.868358	0.114938	1
ENSDARG00000055253	solute carrier family 12 member 10, tandem duplicate 3 [Source:ZFIN;Acc:ZDB-GENE-060503-518]	slc12a10.3	0.979324	0.115034	1
ENSDARG00000088255	SPARC related modular calcium binding 1 [Source:ZFIN;Acc:ZDB-GENE-110310-7]	smoc1	-1.0318	0.115069	1
ENSDARG00000104517	ubiquinol-cytochrome c reductase, complex III subunit X [Source:ZFIN;Acc:ZDB-GENE-170406-3]	uqcr10	0.280848	0.115103	1
ENSDARG00000102288	photoreceptor cilium actin regulator 1 [Source:NCBI gene;Acc:100537793]	CABZ01056321.1	0.275244	0.115117	1
ENSDARG00000095707		BX322665.2	1.79639	0.115169	1
ENSDARG00000077187	interphotoreceptor matrix proteoglycan 1a [Source:ZFIN;Acc:ZDB-GENE-070424-197]	impg1a	0.565405	0.115196	1
ENSDARG00000057649	SATB homeobox 1a [Source:ZFIN;Acc:ZDB-GENE-031010-36]	satb1a	-0.330075	0.115247	1
ENSDARG00000113106		CABZ01080371.3	1.1733	0.115414	1
ENSDARG00000012460	Ras association domain family member 4a [Source:ZFIN;Acc:ZDB-GENE-050102-3]	rassf4a	0.772735	0.11548	1
ENSDARG00000112967	si:dkey-261m9.8 [Source:NCBI gene;Acc:100329422]	CR762436.2	1.85501	0.115481	1
ENSDARG00000076480	mcf.2 cell line derived transforming sequence-like b [Source:ZFIN;Acc:ZDB-GENE-081104-416]	mcf2lb	-0.559254	0.115548	1
ENSDARG00000015623	adenosine deaminase 2b [Source:ZFIN;Acc:ZDB-GENE-041210-77]	ada2b	0.940509	0.115594	1
ENSDARG00000114950		BX005022.3	1.97166	0.11562	1
ENSDARG00000038018	peripherin 2a (retinal degeneration, slow) [Source:ZFIN;Acc:ZDB-GENE-000616-8]	prph2a	0.405001	0.115635	1
ENSDARG00000105400	si:ch73-368j24.14 [Source:NCBI gene;Acc:100000783]	CU457819.3	1.26184	0.115716	1
ENSDARG00000104326	si:dkey-183i3.9 [Source:ZFIN;Acc:ZDB-GENE-141216-302]	si:dkey-183i3.9	-0.953131	0.11576	1
[truncated: 25,772 more rows]
