# Supplementary material for: Strip1 regulates retinal ganglion cell survival by suppressing Jun-mediated apoptosis to promote retinal neural circuit formation
Source: eLife. 2022 Mar 22;11:e74650. doi: 10.7554/eLife.74650 (PMC8940179; doi:10.7554/eLife.74650)
Supplement: Figure 6—source data 2. [file elife-74650-fig6-data2.xlsx]

## Sheet: Figure 6D
Percentage of p-Jun/Zn5 area				Unpaired t test with Welch's correction
wild-type sibling	Strip1rw147			P value	0.0135
0.881756	9.17144			P value summary	*
0.794793	7.55028			Significantly different (P < 0.05)?	Yes
0.498485	9.84727			One- or two-tailed P value?	Two-tailed
2.12578	29.307			Welch-corrected t, df	t=3.686, df=5.147
3.81297	31.2568
2.53663	19.7891

## Sheet: Figure 6F
Percentage of p-Jun/Zn5 area				Unpaired t test with Welch's correction
STD-MO	MO-strn3			P value	0.0055
4.54398	8.74542			P value summary	**
5.97796	20.0815			Significantly different (P < 0.05)?	Yes
6.60248	17.7502			One- or two-tailed P value?	Two-tailed
3.88961	14.7476			Welch-corrected t, df	t=4.886, df=4.664
6.55483	14.6574

## Sheet: Figure 6H
Number of TUNEL+ cells in GCL
	wild-type sibling						strip1rw147
STD-MO	0	1	0	1	0	1	21	37	18	34	33	51
MO-jun	0	0	0	1	1	0	8	7	6	5	2	5
Tukey's multiple comparisons test	Mean Diff.	95.00% CI of diff.	Below threshold?	Summary	Adjusted P Value
STD-MO:wt vs. STD-MO:strip1rw147	-31.83	-41.61 to -22.06	Yes	****	<0.0001
STD-MO:wt vs. MO-jun:wt	0.1667	-9.607 to 9.941	No	ns	>0.9999
STD-MO:wt vs. MO-jun:strip1rw147	-5	-14.77 to 4.774	No	ns	0.4951
STD-MO:strip1rw147 vs. MO-jun:wt	32	22.23 to 41.77	Yes	****	<0.0001
STD-MO:strip1rw147 vs. MO-jun:strip1rw147	26.83	17.06 to 36.61	Yes	****	<0.0001
MO-jun:wt vs. MO-jun:strip1rw147	-5.167	-14.94 to 4.607	No	ns	0.4676

## Sheet: Figure 6J
Percentage of ath5+ area/ total retina area
	wild-type sibling							Strip1rw147
STD-MO	26.3393	26.0345	22.6318	27.5061				4.66488	11.2711	3.62263	4.33649	9.14795	11.1863	3.53239
MO-jun	25.3562	26.4455	25.5681					15.5375	18.7506	19.6668	19.6385	17.5918	18.5804
Tukey's multiple comparisons test	Predicted (LS) mean diff.	95.00% CI of diff.	Below threshold?	Summary	Adjusted P Value
STD-MO:WT vs. STD-MO:Strip1rw147	18.8	14.28 to 23.33	Yes	****	<0.0001
STD-MO:WT vs. MO-jun:WT	-0.162	-5.681 to 5.357	No	ns	0.9998
STD-MO:WT vs. MO-jun:Strip1rw147	7.334	2.669 to 12.00	Yes	**	0.0019
STD-MO:Strip1rw147 vs. MO-jun:WT	-18.97	-23.95 to -13.98	Yes	****	<0.0001
STD-MO:Strip1rw147 vs. MO-jun:Strip1rw147	-11.47	-15.49 to -7.451	Yes	****	<0.0001
MO-jun:WT vs. MO-jun:Strip1rw147	7.496	2.386 to 12.61	Yes	**	0.0034
