# Supplementary material for: Strip1 regulates retinal ganglion cell survival by suppressing Jun-mediated apoptosis to promote retinal neural circuit formation
Source: eLife. 2022 Mar 22;11:e74650. doi: 10.7554/eLife.74650 (PMC8940179; doi:10.7554/eLife.74650)
Supplement: Figure 7—source data 1. [file elife-74650-fig7-data1.xlsx]

## Sheet: Figure 7B
Number of TUNEL+ cells in GCL
	wild-type sibling			strip1rw147
Bcl2-	0	0	2	9	21	12
Bcl2+	0	1	0	1	1	0
Tukey's multiple comparisons test	Mean Diff.	95.00% CI of diff.	Below threshold?	Summary	Adjusted P Value
Bcl2-:wt vs. Bcl2-:strip1rw147	-13.33	-21.70 to -4.962	Yes	**	0.0041
Bcl2-:wt vs. Bcl2+:wt	0.3333	-8.038 to 8.704	No	ns	0.9992
Bcl2-:wt vs. Bcl2+:strip1rw147	0	-8.371 to 8.371	No	ns	>0.9999
Bcl2-:strip1rw147 vs. Bcl2+:wt	13.67	5.296 to 22.04	Yes	**	0.0035
Bcl2-:strip1rw147 vs. Bcl2+:strip1rw147	13.33	4.962 to 21.70	Yes	**	0.0041
Bcl2+:wt vs. Bcl2+:strip1rw147	-0.3333	-8.704 to 8.038	No	ns	0.9992

## Sheet: Figure 7D
Percentage of ath5+ area/ total retina area
	wild-type sibling				strip1rw147
Bcl2-	21.5444	21.2395	24.7608	25.2035	8.16001	9.25734	12.4275	9.14311
Bcl2+	21.7733	23.5337	22.5501		16.1835	17.8003	20.5744	18.8558
Tukey's multiple comparisons test	Predicted (LS) mean diff.	95.00% CI of diff.	Below threshold?	Summary	Adjusted P Value
Bcl2-:wt vs. Bcl2-:strip1rw147	13.44	9.639 to 17.24	Yes	****	<0.0001
Bcl2-:wt vs. Bcl2+:wt	0.568	-3.538 to 4.674	No	ns	0.9745
Bcl2-:wt vs. Bcl2+:strip1rw147	4.834	1.032 to 8.635	Yes	*	0.0128
Bcl2-:strip1rw147 vs. Bcl2+:wt	-12.87	-16.98 to -8.766	Yes	****	<0.0001
Bcl2-:strip1rw147 vs. Bcl2+:strip1rw147	-8.607	-12.41 to -4.805	Yes	***	0.0001
Bcl2+:wt vs. Bcl2+:strip1rw147	4.266	0.1597 to 8.371	Yes	*	0.0411
